# Supplementary material
Source: Research Square preprint supplement (doi:10.21203/rs.3.rs-8988536/v1)
Supplement: Supplementary file 1 [file 03f5bd059999fb9f4ba435db.pdf]

**Patient ID 78**

|           | Euclidean distance to D |
|-----------|-------------------------|
| F         | 6.2                     |
| 4° 30 min | 3.0                     |
| 4° 3 h    | 13.8                    |
| RT 30 min | 20.5                    |
| RT 3 h    | 22.2                    |

**Patient ID 79**

|           | Euclidean distance to D |
|-----------|-------------------------|
| F         | 21.9                    |
| 4° 30 min | 22.7                    |
| 4° 3 h    | 22.6                    |
| RT 30 min | 21.9                    |
| RT 3 h    | 17.4                    |

**Patient ID 80**

|           | Euclidean distance to D |
|-----------|-------------------------|
| F         | 6.8                     |
| 4° 30 min | 7.5                     |
| 4° 3 h    | 11.7                    |
| RT 30 min | 13.9                    |
| RT 3 h    | 11.9                    |

**Patient ID 81**

|           | Euclidean distance to D |
|-----------|-------------------------|
| F         | 8.5                     |
| 4° 30 min | 12.3                    |
| 4° 3 h    | 12.7                    |
| RT 30 min | 38.8                    |
| RT 3 h    | 25.4                    |
