# Supplementary material
Source: Research Square preprint supplement (doi:10.21203/rs.3.rs-8988536/v1)
Supplement: Supplementary file 1 [file 663d3467bb092fd5ec169756.xlsx]

## Sheet: Supplementary Table 1
Table 1: Proteins identified in different state of the art datasets, analyzing the proteome composition of the soluble urine fractionof patients with different kidney disease or healthy donors.
Abrrevations: AKD: Acute kidney disease, DKD:Diabetic kidney disease, CKD: Chronic kidney disease; PN: Pyleonephritis, 1 = found, 0 = not found
	AKD (Brasileiro-Martins et al. (2024))	DKD (Yun et al. (2025))	Control	CKD(Kohza et al. (2025))	PN (In house)
Q9Y6Z7	1	0	0	1	1
Q9Y6X5	1	1	0	0	1
Q9Y6R7	1	0	1	1	1
Q9Y6N8	1	0	0	0	0
Q9Y6N5	1	0	0	1	1
Q9Y6C2	1	1	0	1	1
Q9Y696	1	1	1	1	1
Q9Y653	1	1	1	1	1
Q9Y646	1	1	1	1	1
Q9Y625	1	0	1	0	1
Q9Y624	1	1	1	1	1
Q9Y623	1	0	0	0	0
Q9Y5Z4	1	1	1	1	1
Q9Y5Z0	1	0	0	0	1
Q9Y5Y7	1	1	1	1	1
Q9Y5Q6	1	0	0	1	0
Q9Y5I0	1	0	0	0	0
Q9Y5H8	1	1	0	0	0
Q9Y5H7	1	0	0	0	0
Q9Y5H6	1	0	0	0	0
Q9Y5H5	1	0	0	0	0
Q9Y5C1	1	1	1	1	1
Q9Y536	1	0	0	0	0
Q9Y4L1	1	0	1	1	1
Q9Y4E8	1	0	0	1	1
Q9Y490	1	1	1	1	1
Q9Y473	1	0	0	0	0
Q9Y3Q7	1	0	0	0	0
Q9Y3D6	1	0	0	0	1
Q9Y3B3	1	0	1	1	1
Q9Y394	1	0	0	1	1
Q9Y376	1	1	1	1	1
Q9Y2V7	1	0	0	0	0
Q9Y2S2	1	1	1	1	1
Q9Y2J2	1	1	1	1	1
Q9Y2G1	1	0	1	0	1
Q9Y2E5	1	1	1	1	1
Q9Y287	1	1	1	1	1
Q9Y281	1	0	1	0	1
Q9Y279	1	1	1	1	1
Q9Y275	1	1	0	0	1
Q9Y274	1	0	1	0	1
Q9Y235	1	0	0	0	0
Q9UQV4	1	0	1	0	1
Q9UQN3	1	0	1	1	1
Q9UQB8	1	0	1	0	1
Q9UPY3	1	0	0	0	0
Q9UNZ2	1	1	0	1	1
Q9UNW1	1	1	1	1	1
Q9UNN8	1	1	1	1	1
Q9UNF1	1	0	1	0	1
Q9UN75	1	0	1	0	1
Q9UN74	1	0	1	0	1
Q9UN73	1	1	1	0	0
Q9UN72	1	0	0	1	0
Q9UN70	1	1	1	1	1
Q9UN37	1	1	1	1	1
Q9UMX5	1	1	1	1	1
Q9UMR5	1	1	1	0	1
Q9UMD9	1	1	0	0	1
Q9UM47	1	1	1	0	1
Q9UM22	1	1	1	1	1
Q9ULZ3	1	1	0	1	1
Q9ULW6	1	0	0	0	0
Q9ULV1	1	1	1	0	1
Q9ULR3	1	0	0	0	0
Q9ULK6	1	1	1	1	1
Q9ULI3	1	1	1	1	1
Q9ULE0	1	0	0	0	0
Q9ULC0	1	1	1	0	1
Q9ULB4	1	0	0	0	0
Q9ULB1	1	0	0	0	0
Q9UL52	1	0	1	1	0
Q9UL46	1	0	1	1	1
Q9UKZ9	1	0	1	1	1
Q9UKY0	1	1	1	0	1
Q9UKX3	1	0	0	0	0
Q9UKX2	1	1	0	1	1
Q9UKU9	1	1	1	1	1
Q9UKU6	1	1	1	1	1
Q9UKS6	1	1	1	0	1
Q9UKR3	1	1	1	1	1
Q9UKG1	1	0	0	1	1
Q9UK55	1	0	0	1	1
Q9UK41	1	1	1	0	1
Q9UK05	1	0	0	1	0
Q9UJW2	1	0	1	0	1
Q9UJJ9	1	1	1	1	1
Q9UJ90	1	0	1	0	1
Q9UJ72	1	1	0	1	1
Q9UIV8	1	1	1	1	1
Q9UIB8	1	1	1	1	1
Q9UI15	1	0	0	0	0
Q9UI12	1	1	1	1	1
Q9UHY7	1	1	0	1	1
Q9UHL4	1	1	1	1	1
Q9UHI8	1	1	0	1	1
Q9UHI7	1	0	1	0	1
Q9UHG2	1	1	1	1	1
Q9UHF0	1	1	0	0	1
Q9UHB9	1	0	0	0	1
Q9UGT4	1	1	1	1	1
Q9UGN4	1	1	1	1	1
Q9UGM5	1	1	0	1	1
Q9UGM3	1	1	1	1	1
Q9UGJ1	1	0	0	0	0
Q9UGB7	1	0	1	0	1
Q9UEY8	1	0	0	1	1
Q9UEF7	1	1	1	1	1
Q9UBY9	1	0	0	1	0
Q9UBY0	1	0	0	0	0
Q9UBX7	1	1	1	1	1
Q9UBX5	1	0	1	1	1
Q9UBX1	1	1	1	0	1
Q9UBV8	1	1	1	1	1
Q9UBU3	1	0	0	1	0
Q9UBU2	1	0	0	0	0
Q9UBR2	1	1	1	1	1
Q9UBQ7	1	1	1	1	1
Q9UBQ6	1	1	1	1	1
Q9UBP4	1	0	1	1	1
Q9UBI6	1	1	1	1	1
Q9UBG3	1	1	1	1	1
Q9UBG0	1	1	1	0	1
Q9UBF9	1	0	0	0	0
Q9UBD6	1	1	1	1	1
Q9UBC9	1	1	1	1	1
Q9P1W8	1	0	0	0	0
Q9P1F3	1	1	1	1	1
Q9P121	1	1	1	1	1
Q9NZZ3	1	1	1	1	1
Q9NZT1	1	1	1	1	1
Q9NZP8	1	1	1	1	1
Q9NZN3	1	0	0	0	0
Q9NZH0	1	1	1	1	1
Q9NZD4	1	1	0	1	1
Q9NYQ7	1	0	0	0	0
Q9NY97	1	1	1	1	1
Q9NY84	1	0	0	0	0
Q9NY65	1	0	0	0	0
Q9NY25	1	0	1	1	1
Q9NXE8	1	0	0	0	0
Q9NWV4	1	1	1	1	1
Q9NVP1	1	0	0	0	0
Q9NUQ9	1	1	1	1	1
Q9NUM4	1	1	1	1	1
Q9NU53	1	1	1	1	1
Q9NU22	1	0	0	0	0
Q9NTK5	1	0	1	1	1
Q9NSB2	1	0	0	0	1
Q9NS71	1	1	0	1	1
Q9NRX4	1	1	1	1	1
Q9NRW1	1	0	0	0	0
Q9NRR1	1	1	0	1	1
Q9NR99	1	1	1	1	1
Q9NR12	1	0	0	0	1
Q9NQX5	1	0	0	0	1
Q9NQS3	1	1	1	1	1
Q9NQR4	1	1	1	1	1
Q9NQ84	1	0	1	1	1
Q9NQ79	1	1	1	1	1
Q9NQ76	1	0	0	0	0
Q9NQ38	1	1	1	1	1
Q9NQ36	1	1	1	1	1
Q9NPY3	1	1	1	1	1
Q9NPH3	1	1	1	1	1
Q9NPH2	1	0	0	0	1
Q9NPG4	1	1	1	1	1
Q9NPG3	1	0	0	0	0
Q9NPF0	1	1	1	1	1
Q9NP98	1	0	0	0	0
Q9NP90	1	0	0	0	0
Q9NP84	1	1	1	1	1
Q9NP79	1	0	1	1	1
Q9NP72	1	0	0	1	1
Q9NNX6	1	0	1	1	1
Q9HD89	1	1	1	1	1
Q9HD42	1	0	1	1	1
Q9HCY8	1	0	1	1	1
Q9HCU0	1	1	1	1	1
Q9HCN6	1	1	1	1	1
Q9HCC6	1	0	0	0	0
Q9HC84	1	1	1	1	1
Q9HC38	1	0	1	1	1
Q9HC10	1	1	0	0	0
Q9HBR0	1	1	1	1	1
Q9HBJ8	1	1	1	1	1
Q9HBB8	1	1	1	1	1
Q9HB40	1	1	1	1	1
Q9HAV0	1	0	0	0	1
Q9HAT2	1	1	1	1	1
Q9HAC8	1	0	0	0	0
Q9H9P2	1	1	1	0	1
Q9H9H4	1	0	1	0	1
Q9H8L6	1	1	1	1	1
Q9H8J5	1	1	1	0	1
Q9H853	1	0	0	0	0
Q9H756	1	1	1	0	1
Q9H6X2	1	1	1	1	1
Q9H6S3	1	1	1	1	1
Q9H6N6	1	0	0	1	0
Q9H6B4	1	1	1	1	1
Q9H665	1	0	1	1	1
Q9H4M9	1	0	1	1	1
Q9H4B7	1	0	0	0	0
Q9H444	1	1	1	1	1
Q9H3K6	1	0	1	1	1
Q9H3G5	1	1	1	1	1
Q9H361	1	0	0	0	0
Q9H336	1	0	0	0	1
Q9H2M3	1	0	1	1	1
Q9H2A7	1	1	0	0	1
Q9H299	1	0	1	1	1
Q9H223	1	1	1	1	1
Q9H1Z8	1	0	0	0	1
Q9H173	1	0	0	1	1
Q9H159	1	0	1	1	1
Q9H0X4	1	1	1	0	1
Q9H0W9	1	0	1	1	1
Q9H0W8	1	0	0	0	0
Q9H0V9	1	0	0	0	0
Q9H0U4	1	0	1	1	1
Q9H0E2	1	1	1	1	1
Q9H0B8	1	0	0	1	1
Q9H082	1	0	0	0	0
Q9H008	1	0	1	0	1
Q9GZX9	1	1	1	1	1
Q9GZV4	1	0	0	0	0
Q9GZP4	1	0	1	1	1
Q9GZP0	1	0	0	0	0
Q9GZM7	1	1	1	1	1
Q9GZM5	1	0	1	1	1
Q9C0H2	1	0	1	0	1
Q9C0G6	1	0	0	0	0
Q9BZZ2	1	1	1	0	1
Q9BZP6	1	0	0	0	0
Q9BZM5	1	0	1	1	0
Q9BZG1	1	0	0	0	1
Q9BYZ2	1	0	0	0	1
Q9BYX7	1	0	0	0	0
Q9BYJ0	1	1	1	0	1
Q9BYF1	1	1	1	1	1
Q9BYE9	1	1	1	1	1
Q9BYE4	1	0	0	0	0
Q9BYD5	1	0	0	0	0
Q9BY76	1	0	0	0	0
Q9BY67	1	1	1	1	1
Q9BXY5	1	0	0	0	0
Q9BXX0	1	1	0	0	0
Q9BXR6	1	1	1	1	1
Q9BXP8	1	1	1	1	1
Q9BXN2	1	1	1	1	1
Q9BXL6	1	0	0	0	0
Q9BXJ7	1	1	1	1	1
Q9BXJ1	1	0	0	0	0
Q9BX97	1	0	0	0	0
Q9BX67	1	1	1	1	1
Q9BX63	1	0	0	0	0
Q9BWD1	1	0	0	1	1
Q9BW04	1	1	1	1	1
Q9BVM4	1	1	1	1	1
Q9BVK6	1	0	1	1	1
Q9BVA1	1	0	0	0	0
Q9BUT1	1	1	1	1	1
Q9BUN1	1	1	0	0	0
Q9BUL8	1	0	1	0	1
Q9BUF5	1	0	0	1	0
Q9BUD6	1	1	0	1	1
Q9BTY2	1	1	1	1	1
Q9BTM1	1	0	0	0	0
Q9BSW2	1	0	0	0	0
Q9BSG0	1	1	1	1	1
Q9BS26	1	1	1	1	1
Q9BRK5	1	1	1	1	1
Q9BRK3	1	1	1	1	1
Q9BRA2	1	1	1	1	1
Q9BQT9	1	1	1	1	1
Q9BQE3	1	0	1	1	1
Q9BQ51	1	1	1	1	1
Q99996	1	0	0	0	1
Q99988	1	1	1	1	1
Q99983	1	1	1	1	1
Q99973	1	0	0	0	0
Q99972	1	1	0	1	1
Q99969	1	1	1	1	1
Q99880	1	0	0	0	0
Q99879	1	0	0	0	0
Q99878	1	1	0	0	0
Q99877	1	0	0	0	0
Q99816	1	0	1	1	1
Q99795	1	1	0	0	0
Q99733	1	0	0	0	1
Q99731	1	0	0	0	0
Q99715	1	0	1	1	1
Q99674	1	1	1	1	1
Q99574	1	1	1	1	1
Q99542	1	0	0	0	0
Q99538	1	1	1	1	1
Q99536	1	1	1	1	1
Q99523	1	1	1	0	1
Q99519	1	1	1	1	1
Q99497	1	1	1	1	1
Q99490	1	0	0	0	0
Q99469	1	0	0	0	0
Q99456	1	0	1	0	0
Q99075	1	1	1	0	0
Q96S96	1	1	1	1	1
Q96RW7	1	1	1	1	1
Q96QV6	1	0	0	0	0
Q96QR1	1	0	0	0	1
Q96QC0	1	0	0	0	0
Q96PX8	1	1	1	1	1
Q96PD5	1	1	1	1	1
Q96PC5	1	0	0	0	1
Q96P63	1	1	1	1	1
Q96NZ9	1	1	1	1	1
Q96NY8	1	1	1	1	1
Q96MU8	1	1	1	0	1
Q96MG2	1	1	1	1	1
Q96M60	1	0	0	0	0
Q96KV6	1	0	0	0	0
Q96KR1	1	0	0	0	0
Q96KP4	1	1	1	1	1
Q96KP1	1	0	0	0	1
Q96KN2	1	1	1	1	1
Q96KK5	1	0	0	0	0
Q96JQ0	1	1	1	1	1
Q96JD6	1	0	0	0	0
Q96J84	1	1	1	1	1
Q96IY4	1	1	0	1	1
Q96IU4	1	1	1	1	1
Q96HD9	1	1	1	1	1
Q96HC4	1	1	1	1	1
Q96GW7	1	1	1	0	1
Q96FW1	1	0	1	1	1
Q96FQ6	1	1	1	1	1
Q96FN5	1	1	1	0	1
Q96FE7	1	1	1	1	1
Q96F10	1	0	1	0	1
Q96EY5	1	0	1	0	1
Q96EK7	1	0	0	0	0
Q96EE4	1	0	0	0	1
Q96E17	1	0	0	0	0
Q96DT5	1	0	0	0	0
Q96DR8	1	0	1	0	1
Q96DG6	1	1	1	1	1
Q96DA2	1	0	0	0	0
Q96DA0	1	1	1	1	1
Q96C23	1	1	1	1	1
Q96BY6	1	0	0	0	0
Q96BA8	1	0	0	0	0
Q96B49	1	0	0	0	0
Q96AX2	1	0	0	0	0
Q96AP7	1	0	1	1	1
Q96A19	1	0	0	0	0
Q96A08	1	0	0	0	0
Q969Z4	1	1	1	1	1
Q969P0	1	0	1	1	1
Q969H8	1	1	1	1	1
Q969E1	1	1	1	1	1
Q93088	1	1	1	1	1
Q93079	1	0	0	0	0
Q93077	1	0	0	0	0
Q92956	1	0	1	0	1
Q92954	1	1	1	1	1
Q92930	1	0	1	1	1
Q92928	1	0	0	0	0
Q92896	1	1	1	1	1
Q92876	1	1	1	1	1
Q92874	1	0	0	0	0
Q92859	1	1	1	1	1
Q92820	1	1	1	1	1
Q92817	1	0	1	1	1
Q92800	1	0	0	0	0
Q92793	1	0	0	0	1
Q92743	1	1	0	1	1
Q92729	1	0	0	0	0
Q92692	1	1	1	1	1
Q92673	1	1	1	1	1
Q92597	1	1	1	1	1
Q92562	1	0	0	0	0
Q92542	1	0	1	0	1
Q92530	1	0	0	1	1
Q92520	1	1	1	1	1
Q92496	1	1	1	0	1
Q92484	1	1	1	0	1
Q8WZ79	1	0	0	0	0
Q8WZ75	1	1	1	1	1
Q8WZ42	1	1	1	1	1
Q8WY54	1	0	0	0	0
Q8WXA2	1	0	0	0	0
Q8WWB3	1	0	0	0	0
Q8WWA0	1	1	1	1	1
Q8WW59	1	0	0	1	0
Q8WW52	1	0	1	1	1
Q8WVV5	1	0	0	0	0
Q8WVQ1	1	1	1	1	1
Q8WVN6	1	0	1	1	1
Q8WV92	1	0	1	0	1
Q8WUT4	1	1	1	0	1
Q8WUM4	1	1	1	1	1
Q8WUA8	1	1	0	1	1
Q8WU39	1	1	1	0	1
Q8TF66	1	1	1	1	1
Q8TE73	1	0	0	1	1
Q8TDQ1	1	0	1	1	1
Q8TDQ0	1	1	1	1	1
Q8TDL5	1	1	1	1	1
Q8TCZ2	1	1	1	0	1
Q8TCT8	1	0	1	0	1
Q8TCD5	1	1	1	1	1
Q8TC84	1	0	0	0	0
Q8TBP5	1	1	0	0	1
Q8TB96	1	1	1	0	1
Q8TAT5	1	0	0	0	0
Q8NI99	1	0	0	1	0
Q8NI29	1	0	0	0	0
Q8NI22	1	0	0	0	0
Q8NHP8	1	1	1	1	1
Q8NHP1	1	0	0	0	0
Q8NHM4	1	0	0	0	0
Q8NHJ6	1	0	1	1	1
Q8NG11	1	0	0	0	1
Q8NFZ8	1	1	1	1	1
Q8NFU3	1	1	0	1	1
Q8NFJ5	1	1	1	1	1
Q8NF91	1	0	0	0	1
Q8NES3	1	1	0	1	1
Q8NDV1	1	0	0	0	0
Q8NDA2	1	1	1	1	1
Q8NCW5	1	1	1	1	1
Q8NCC3	1	1	1	1	1
Q8NC54	1	1	1	0	1
Q8NC42	1	1	1	1	1
Q8NBS9	1	0	1	1	1
Q8NBP7	1	0	0	0	0
Q8NBJ7	1	0	0	1	1
Q8NBJ4	1	1	1	1	1
Q8N6Q3	1	0	1	1	1
Q8N4F0	1	1	1	1	1
Q8N475	1	0	0	0	0
Q8N474	1	1	0	1	1
Q8N3J6	1	1	1	0	1
Q8N386	1	1	1	1	1
Q8N335	1	0	0	0	1
Q8N307	1	0	1	1	1
Q8N2U0	1	0	1	1	1
Q8N2S1	1	1	1	1	1
Q8N2G4	1	1	1	0	1
Q8N271	1	1	1	0	1
Q8N257	1	0	0	0	0
Q8N1N4	1	0	1	1	1
Q8N1A0	1	0	0	0	0
Q8N126	1	1	1	1	1
Q8N114	1	0	1	0	1
Q8N0Y7	1	0	0	0	0
Q8IZF2	1	1	1	0	1
Q8IZA0	1	0	1	1	1
Q8IZ41	1	0	0	0	0
Q8IYS5	1	1	1	1	1
Q8IYR2	1	0	0	0	0
Q8IXT5	1	0	0	0	0
Q8IX05	1	0	0	1	1
Q8IWU5	1	1	1	1	1
Q8IVF2	1	1	1	0	1
Q8IV08	1	1	1	1	1
Q8IUX7	1	1	0	0	1
Q8IUL8	1	0	1	1	1
Q8IUK5	1	1	1	1	1
Q8IUE6	1	0	0	0	0
Q86YW5	1	0	0	1	1
Q86YT9	1	0	1	1	1
Q86YS6	1	0	0	0	1
Q86YR7	1	0	0	0	0
Q86YQ8	1	1	1	0	1
Q86Y46	1	0	0	0	1
Q86Y38	1	1	1	0	1
Q86X29	1	0	0	1	1
Q86VB7	1	0	1	0	1
Q86V85	1	1	1	1	1
Q86UN3	1	1	1	1	1
Q86UL8	1	0	0	0	0
Q86UD1	1	1	1	1	1
Q86TD4	1	0	0	0	0
Q86T13	1	1	1	1	1
Q86SQ4	1	1	1	1	1
Q86SG5	1	1	0	1	0
Q7Z7M0	1	1	1	1	1
Q7Z7H5	1	1	1	1	1
Q7Z7D3	1	0	1	0	1
Q7Z794	1	0	1	1	1
Q7Z6P3	1	0	0	0	1
Q7Z5N4	1	0	1	1	1
Q7Z5L7	1	1	0	0	1
Q7Z5L0	1	1	1	1	1
Q7Z4W1	1	0	1	1	1
Q7Z4R8	1	1	1	0	1
Q7Z4F1	1	1	1	0	1
Q7Z3Z0	1	0	0	0	0
Q7Z3Y9	1	0	0	0	0
Q7Z3Y8	1	0	0	0	0
Q7Z3Y7	1	0	0	0	0
Q7Z3B1	1	1	1	1	1
Q7RTV2	1	0	0	1	0
Q7RTS7	1	0	1	1	0
Q7LBR1	1	1	0	1	1
Q7L7L0	1	0	0	0	0
Q7KYR7	1	0	1	1	1
Q76M96	1	1	0	0	0
Q71UI9	1	0	0	0	0
Q71U36	1	0	0	0	0
Q71DI3	1	0	0	0	0
Q70SY1	1	1	0	0	1
Q6ZSJ9	1	1	1	0	1
Q6ZQQ6	1	0	0	0	0
Q6ZNJ1	1	0	0	1	1
Q6ZMR3	1	0	0	0	0
Q6ZMJ2	1	1	1	0	1
Q6ZMH5	1	0	0	0	1
Q6YHK3	1	1	1	0	1
Q6W4X9	1	1	1	1	1
Q6V0I7	1	1	1	1	1
Q6UY14	1	1	1	1	1
Q6UXG3	1	1	1	1	1
Q6UXE8	1	0	0	0	0
Q6UXD5	1	0	1	0	1
Q6UXB8	1	1	1	1	1
Q6UXB4	1	1	0	1	1
Q6UXB3	1	1	1	0	1
Q6UX73	1	1	1	1	1
Q6UX71	1	1	1	0	1
Q6UX15	1	0	1	0	1
Q6UX06	1	1	1	1	1
Q6UWV6	1	1	1	1	1
Q6UWU2	1	0	0	0	0
Q6UWP8	1	1	1	1	1
Q6UWI2	1	0	0	0	0
Q6UWH4	1	1	0	0	1
Q6UVK1	1	1	1	1	1
Q6S8J3	1	0	0	1	0
Q6PK18	1	1	1	1	1
Q6PIW4	1	0	0	0	0
Q6PHR2	1	1	1	0	1
Q6PEY2	1	0	0	0	0
Q6PCB0	1	1	1	1	1
Q6P531	1	0	1	1	1
Q6NXT2	1	0	0	0	0
Q6NWY9	1	0	0	0	0
Q6NW40	1	0	0	0	0
Q6MZW2	1	0	0	0	0
Q6JBY9	1	0	0	0	1
Q6ISS4	1	1	0	0	1
Q6IS14	1	0	0	0	0
Q6IQ22	1	0	0	0	0
Q6GTX8	1	1	1	1	1
Q6FI13	1	0	0	0	0
Q6FHJ7	1	1	1	1	1
Q6EMK4	1	1	1	1	1
Q6EEV6	1	0	0	0	0
Q6E0U4	1	1	1	1	1
Q6DKI7	1	1	1	1	1
Q6DKI2	1	0	0	0	0
Q695T7	1	0	0	0	1
Q68D85	1	1	1	0	1
Q68CJ9	1	1	1	0	1
Q66LE6	1	0	0	0	0
Q66K79	1	1	1	1	1
Q66K74	1	0	0	0	1
Q5ZPR3	1	1	1	1	1
Q5XKE5	1	0	1	1	0
Q5VY43	1	1	1	0	1
Q5VW32	1	1	1	1	1
Q5VUB5	1	0	1	0	1
Q5VTE0	1	1	0	0	0
Q5VSP4	1	0	0	0	0
Q5UCC4	1	0	1	1	1
Q5TZA2	1	0	0	0	0
Q5TFQ8	1	1	1	0	1
Q5TEC6	1	0	1	1	1
Q5TBA9	1	0	0	0	0
Q5T2W1	1	1	1	1	1
Q5T1H1	1	0	0	0	0
Q5T013	1	0	0	0	1
Q5SZK8	1	1	1	1	1
Q5QNW6	1	0	0	0	0
Q5KU26	1	1	1	1	1
Q5JZY3	1	1	1	1	1
Q5JXA9	1	0	1	1	1
Q5JWF2	1	0	0	0	0
Q5JT25	1	0	0	0	0
Q5JS37	1	1	1	1	1
Q5JRA6	1	1	1	1	1
Q5IJ48	1	1	1	1	1
Q5DX21	1	0	0	0	0
Q58FG1	1	0	0	0	1
Q58FG0	1	0	0	0	0
Q58FF8	1	0	0	0	0
Q58FF7	1	0	0	0	0
Q58FF6	1	0	1	0	1
Q58EX2	1	0	0	0	0
Q56UQ5	1	0	0	0	0
Q562R1	1	1	0	1	1
Q53RT3	1	0	1	1	0
Q53RD9	1	1	1	1	1
Q53H76	1	0	0	0	0
Q53GG5	1	0	0	1	1
Q53GD3	1	1	1	1	1
Q4G0I0	1	0	0	0	1
Q496F6	1	1	1	1	1
Q3ZCM7	1	0	0	0	0
Q3SY84	1	0	0	1	0
Q3LXA3	1	0	1	1	1
Q3B8N2	1	0	0	0	0
Q32P51	1	0	0	0	0
Q2VIQ3	1	0	0	0	0
Q2TV78	1	0	0	0	0
Q2M2I5	1	0	0	1	0
Q2M2H8	1	0	0	0	0
Q24JP5	1	1	1	1	1
Q16851	1	0	1	1	1
Q16849	1	1	1	0	1
Q16836	1	0	0	1	1
Q16832	1	1	1	1	1
Q16819	1	0	1	1	1
Q16778	1	0	0	0	0
Q16777	1	0	0	0	1
Q16772	1	0	0	0	0
Q16769	1	1	1	1	1
Q16706	1	1	1	1	1
Q16695	1	0	0	0	0
Q16661	1	1	0	1	1
Q16651	1	1	1	1	1
Q16610	1	1	1	1	1
Q16609	1	0	1	0	1
Q16586	1	0	0	0	1
Q16581	1	1	0	0	1
Q16539	1	0	1	1	1
Q16473	1	0	0	0	0
Q16363	1	1	1	0	1
Q16270	1	1	1	1	1
Q16143	1	0	0	0	0
Q15907	1	1	0	0	1
Q15904	1	1	1	1	1
Q15848	1	1	1	1	1
Q15847	1	1	1	1	1
Q15843	1	0	1	0	1
Q15828	1	1	1	1	1
Q15819	1	0	0	0	1
Q15771	1	0	0	0	0
Q15762	1	0	1	0	0
Q15746	1	1	1	1	1
Q15582	1	1	0	1	1
Q15517	1	0	1	0	1
Q15485	1	1	1	1	1
Q15435	1	0	1	1	1
Q15375	1	1	1	0	1
Q15286	1	0	1	0	1
Q15274	1	1	1	1	1
Q15223	1	1	1	1	1
Q15195	1	0	0	0	0
Q15166	1	0	0	0	1
Q15121	1	0	0	1	1
Q15113	1	1	1	1	1
Q15084	1	1	1	1	1
Q15063	1	1	0	1	1
Q15043	1	0	1	0	1
Q14CN4	1	0	1	0	0
Q149M9	1	0	0	0	0
Q14999	1	0	0	0	0
Q14997	1	0	0	0	0
Q14982	1	1	1	1	1
Q14964	1	0	0	0	0
Q14956	1	1	0	1	1
Q14914	1	1	1	1	1
Q14894	1	1	1	1	1
Q14847	1	1	1	1	1
Q14767	1	0	1	1	1
Q14766	1	1	1	0	1
Q14703	1	0	1	0	0
Q14697	1	0	1	1	1
Q14667	1	0	0	1	1
Q14624	1	1	1	1	1
Q14574	1	1	1	1	1
Q14568	1	0	0	0	0
Q14524	1	0	0	0	0
Q14515	1	1	1	1	1
Q14508	1	1	1	1	1
Q14507	1	0	0	0	0
Q14393	1	1	1	1	1
Q14390	1	0	0	0	0
Q14344	1	1	1	1	1
Q14324	1	0	0	0	0
Q14315	1	1	1	1	1
Q14314	1	1	1	1	1
Q14247	1	1	1	1	1
Q14240	1	0	0	0	1
Q14210	1	1	1	1	1
Q14203	1	0	0	1	1
Q14137	1	0	0	0	0
Q14134	1	1	1	1	1
Q14126	1	1	1	1	1
Q14118	1	1	1	1	1
Q14112	1	1	0	1	1
Q14108	1	1	1	0	1
Q14103	1	0	1	1	1
Q14019	1	1	1	1	1
Q13885	1	0	1	1	1
Q13873	1	1	1	0	1
Q13822	1	0	1	0	1
Q13813	1	1	1	1	1
Q13790	1	1	1	1	1
Q13683	1	0	0	0	1
Q13621	1	1	1	1	1
Q13591	1	1	1	1	1
Q13510	1	1	1	1	1
Q13509	1	0	0	1	1
Q13508	1	1	1	1	1
Q13477	1	0	1	1	1
Q13449	1	0	1	1	1
Q13445	1	1	1	0	1
Q13444	1	1	0	1	0
Q13443	1	0	1	1	1
Q13438	1	0	0	0	0
Q13421	1	1	1	1	1
Q13404	1	0	1	1	1
Q13361	1	0	0	1	1
Q13332	1	1	1	1	1
Q13308	1	1	1	1	1
Q13231	1	1	1	1	1
Q13228	1	1	1	1	1
Q13201	1	1	1	0	1
Q13162	1	0	1	1	1
Q13148	1	0	0	1	1
Q13145	1	1	1	0	1
Q13113	1	1	1	0	1
Q13103	1	1	1	1	1
Q12931	1	0	0	1	1
Q12929	1	1	1	1	1
Q12923	1	1	1	0	0
Q12913	1	0	1	1	1
Q12907	1	0	1	1	1
Q12864	1	1	1	0	1
Q12860	1	1	1	1	1
Q12841	1	1	1	1	1
Q12805	1	1	1	1	1
Q12797	1	0	0	0	1
Q12794	1	1	1	1	1
Q10588	1	0	1	1	1
Q09666	1	1	1	1	1
Q09328	1	0	1	1	0
Q08ET2	1	1	0	0	1
Q08629	1	1	1	1	1
Q08554	1	1	1	1	1
Q08397	1	0	0	1	1
Q08380	1	1	1	1	1
Q08345	1	1	1	1	1
Q08334	1	0	1	1	1
Q08257	1	1	1	1	1
Q08188	1	1	1	1	1
Q08174	1	1	1	1	1
Q07954	1	1	1	0	1
Q07812	1	1	0	1	1
Q07654	1	1	1	1	1
Q07507	1	1	1	1	1
Q07075	1	1	1	1	1
Q06830	1	1	1	0	1
Q06828	1	1	1	0	1
Q06481	1	1	1	0	1
Q06418	1	1	1	0	1
Q06323	1	1	1	1	1
Q06141	1	1	0	1	0
Q06033	1	1	0	1	1
Q05707	1	1	1	1	1
Q05639	1	0	0	0	1
Q05315	1	1	1	1	1
Q04917	1	1	0	1	1
Q04760	1	1	1	1	1
Q04756	1	1	1	1	1
Q04695	1	0	1	1	1
Q03591	1	1	1	1	1
Q03405	1	1	1	1	1
Q03403	1	1	1	1	1
Q03167	1	1	1	1	1
Q03154	1	1	1	1	1
Q03113	1	0	0	0	0
Q03013	1	0	0	0	1
Q03001	1	0	0	0	0
Q02985	1	1	0	1	1
Q02952	1	1	0	0	1
Q02818	1	1	1	1	1
Q02809	1	0	0	0	0
Q02747	1	1	1	1	1
Q02539	1	0	0	0	0
Q02487	1	1	1	1	1
Q02413	1	1	1	1	1
Q02383	1	1	0	1	1
Q02325	1	0	0	1	0
Q01995	1	1	0	1	0
Q01974	1	1	1	1	1
Q01973	1	1	1	1	1
Q01546	1	0	0	0	1
Q01524	1	0	1	0	1
Q01518	1	1	1	1	1
Q01469	1	1	1	1	1
Q01459	1	1	1	1	1
Q01151	1	1	0	0	1
Q01085	1	0	0	0	1
Q008S8	1	0	0	0	0
Q00872	1	0	0	1	0
Q00796	1	1	1	1	1
Q00610	1	0	1	1	1
Q00005	1	0	0	0	0
P99999	1	0	1	0	1
P98172	1	1	1	1	1
P98164	1	1	1	1	1
P98161	1	1	1	0	1
P98160	1	1	1	1	1
P98153	1	0	0	0	0
P98095	1	1	1	1	1
P84243	1	0	0	0	0
P84077	1	1	0	0	1
P83110	1	1	1	0	1
P81605	1	1	1	1	1
P81172	1	1	1	1	1
P80748	1	1	1	1	1
P80723	1	1	1	1	1
P80370	1	1	1	1	1
P80303	1	0	0	1	1
P80188	1	1	1	1	1
P78536	1	0	0	0	0
P78417	1	1	1	1	1
P78380	1	0	1	1	1
P78332	1	0	0	0	0
P78324	1	1	1	1	1
P69905	1	1	1	1	1
P69892	1	1	0	1	1
P69891	1	1	0	1	1
P68871	1	1	1	1	1
P68431	1	0	1	1	1
P68371	1	1	1	1	1
P68366	1	0	1	1	1
P68363	1	1	1	1	1
P68133	1	1	0	1	1
P68104	1	0	1	1	1
P68032	1	0	0	1	1
P67936	1	1	1	1	1
P67809	1	0	0	0	1
P63316	1	0	0	0	0
P63313	1	1	1	0	1
P63267	1	0	0	0	0
P63261	1	1	0	1	1
P63241	1	0	1	1	1
P63208	1	0	0	1	1
P63151	1	0	0	1	1
P63104	1	1	1	1	1
P63096	1	0	1	0	1
P63092	1	1	1	1	1
P63000	1	1	1	1	1
P62993	1	1	1	1	1
P62987	1	0	0	0	0
P62979	1	0	0	0	1
P62942	1	1	1	1	1
P62937	1	1	1	1	1
P62879	1	1	1	1	1
P62873	1	1	1	1	1
P62857	1	0	1	1	1
P62834	1	1	0	1	1
P62820	1	0	0	1	1
P62807	1	0	0	0	0
P62805	1	1	1	1	1
P62736	1	0	1	1	0
P62491	1	0	1	1	0
P62424	1	0	1	1	1
P62328	1	1	1	1	1
P62258	1	1	1	1	1
P61981	1	1	1	1	1
P61978	1	0	0	1	1
P61970	1	1	1	1	1
P61960	1	1	1	0	1
P61956	1	1	0	0	1
P61916	1	1	1	1	1
P61769	1	0	1	0	1
P61626	1	1	1	0	1
P61604	1	0	1	1	1
P61457	1	1	1	1	1
P61224	1	1	1	1	1
P61204	1	0	1	1	0
P61106	1	1	1	1	1
P61088	1	1	1	1	1
P61026	1	1	1	1	1
P61020	1	1	1	1	1
P61018	1	0	0	0	1
P61006	1	0	1	1	1
P60985	1	0	0	1	0
P60983	1	0	0	1	1
P60981	1	0	1	1	1
P60903	1	0	1	1	1
P60891	1	0	0	1	1
P60842	1	0	1	1	1
P60709	1	1	1	1	1
P60660	1	0	1	1	1
P60174	1	1	1	1	1
P60022	1	1	0	1	1
P59666	1	1	1	1	1
P59665	1	0	0	1	1
P59646	1	0	0	0	0
P59190	1	0	1	0	0
P58876	1	0	1	1	0
P58546	1	0	1	1	1
P58499	1	0	1	1	1
P58400	1	0	1	0	1
P58166	1	0	0	1	1
P57053	1	0	0	0	0
P56537	1	1	1	1	1
P56159	1	1	1	0	1
P55957	1	1	1	0	1
P55854	1	0	1	1	0
P55327	1	0	1	0	1
P55291	1	1	1	1	1
P55290	1	1	1	1	1
P55287	1	1	1	1	1
P55285	1	0	1	1	1
P55268	1	1	1	1	1
P55259	1	1	1	1	1
P55107	1	0	1	0	1
P55103	1	1	0	1	1
P55083	1	0	1	1	1
P55072	1	1	1	1	1
P55017	1	1	1	1	1
P55000	1	1	1	1	1
P54826	1	1	1	0	1
P54819	1	0	1	1	1
P54802	1	1	1	1	1
P54764	1	0	1	1	1
P54760	1	0	1	1	1
P54756	1	0	0	0	0
P54753	1	1	1	1	1
P54727	1	1	1	1	1
P54725	1	1	0	0	1
P54710	1	1	1	0	1
P54652	1	1	1	1	1
P54296	1	0	0	0	0
P54289	1	1	1	1	1
P54132	1	0	0	0	0
P54108	1	0	1	1	1
P54107	1	1	0	1	0
P53990	1	1	1	1	1
P53634	1	1	1	1	1
P52907	1	1	1	1	1
P52823	1	1	1	1	1
P52799	1	1	1	0	1
P52758	1	1	1	1	1
P52746	1	0	0	0	0
P52566	1	1	1	1	1
P52565	1	0	1	1	1
P51888	1	1	1	0	1
P51884	1	1	1	1	1
P51864	1	0	0	0	0
P51857	1	0	0	0	0
P51688	1	1	1	1	1
P51654	1	1	1	1	1
P51648	1	0	0	1	0
P51460	1	0	0	1	0
P51170	1	1	1	0	1
P51161	1	1	0	1	1
P51159	1	0	0	1	1
P51149	1	1	1	1	1
P51148	1	1	1	1	1
P50995	1	1	1	1	1
P50991	1	1	1	1	1
P50897	1	1	1	1	1
P50895	1	0	1	1	1
P50552	1	1	0	1	1
P50461	1	0	0	0	0
P50453	1	1	0	1	1
P50452	1	0	1	0	1
P50395	1	1	1	1	1
P50281	1	0	0	1	0
P50120	1	1	0	1	1
P50053	1	1	1	1	1
P49913	1	0	1	1	1
P49908	1	1	1	1	1
P49788	1	1	1	1	1
P49770	1	0	0	0	0
P49767	1	1	1	0	1
P49747	1	0	1	1	1
P49418	1	0	1	0	1
P49221	1	1	0	1	1
P49190	1	0	0	0	0
P49189	1	1	1	1	1
P48960	1	1	0	1	1
P48745	1	1	1	1	1
P48741	1	0	0	0	0
P48736	1	0	0	0	0
P48735	1	0	1	1	1
P48723	1	0	1	0	1
P48668	1	0	1	1	1
P48637	1	1	1	1	1
P48595	1	1	1	1	1
P48594	1	1	1	1	1
P48551	1	1	1	1	1
P48304	1	1	0	0	1
P48061	1	1	1	1	1
P47929	1	0	1	1	1
P47914	1	0	1	0	1
P47895	1	0	0	1	1
P47755	1	1	1	1	1
P46952	1	1	1	1	1
P46531	1	1	0	0	1
P46439	1	0	0	0	0
P46109	1	1	1	1	1
P46108	1	1	0	1	1
P45877	1	1	1	1	1
P45378	1	0	0	0	0
P43652	1	1	1	1	1
P43251	1	1	1	1	1
P43121	1	1	1	1	1
P42785	1	1	1	1	1
P42704	1	0	0	0	1
P41439	1	0	1	1	0
P41271	1	0	1	1	1
P41222	1	1	1	1	1
P41217	1	0	1	1	1
P41181	1	1	1	1	1
P41159	1	1	0	0	1
P40926	1	1	1	1	1
P40925	1	1	1	1	1
P40227	1	0	1	1	1
P40199	1	1	0	1	0
P40197	1	0	1	1	0
P40189	1	1	1	1	1
P40121	1	1	1	1	1
P39060	1	1	1	1	1
P39059	1	0	1	1	1
P38606	1	1	1	1	1
P38405	1	0	0	0	0
P37840	1	0	0	1	1
P37837	1	1	1	1	1
P37802	1	1	1	1	1
P37173	1	1	1	0	1
P37088	1	0	0	0	1
P36980	1	1	1	1	1
P36957	1	1	1	1	1
P36955	1	1	1	1	1
P36941	1	1	1	0	1
P36896	1	0	1	0	1
P36871	1	1	1	1	1
P36639	1	1	1	1	1
P36578	1	0	1	1	1
P36268	1	0	0	0	0
P36222	1	1	1	1	1
P35908	1	0	1	0	1
P35900	1	0	0	1	1
P35858	1	1	1	1	1
P35754	1	1	1	1	1
P35749	1	0	0	0	0
P35712	1	0	0	0	0
P35613	1	1	1	1	1
P35609	1	0	0	0	0
P35579	1	1	1	1	1
P35556	1	0	0	0	1
P35555	1	1	1	1	1
P35542	1	0	0	1	1
P35527	1	0	1	1	1
P35443	1	0	1	1	1
P35326	1	1	1	1	1
P35325	1	1	0	0	0
P35321	1	1	1	1	1
P35318	1	0	1	0	1
P35241	1	1	1	1	1
P35237	1	0	1	1	1
P35221	1	0	1	1	1
P35052	1	1	1	1	1
P35030	1	1	1	1	1
P34931	1	1	0	0	0
P34913	1	0	1	1	1
P34896	1	1	1	1	1
P34741	1	0	0	0	1
P34096	1	1	1	1	1
P34059	1	1	1	1	1
P33908	1	1	1	1	1
P33778	1	0	0	0	0
P33151	1	1	1	1	1
P32926	1	1	1	1	1
P32119	1	1	1	1	1
P32004	1	1	1	1	1
P31997	1	0	1	1	1
P31949	1	1	1	1	1
P31947	1	1	1	1	1
P31946	1	1	1	1	1
P31944	1	1	1	1	1
P31937	1	0	0	1	1
P31431	1	1	1	0	1
P31249	1	0	0	0	0
P31151	1	1	1	1	1
P31150	1	1	1	1	1
P31146	1	1	1	1	1
P31025	1	1	1	1	1
P30740	1	1	1	1	1
P30626	1	0	1	1	1
P30530	1	1	1	1	1
P30153	1	0	1	1	1
P30101	1	1	1	1	1
P30086	1	1	1	1	1
P30048	1	1	1	1	1
P30047	1	1	1	1	1
P30046	1	1	1	1	1
P30044	1	1	1	1	1
P30043	1	1	1	1	1
P30041	1	1	1	1	1
P30039	1	1	1	1	1
P29972	1	0	1	0	1
P29966	1	0	1	1	1
P29622	1	1	1	1	1
P29508	1	1	1	1	1
P29401	1	1	1	1	1
P29373	1	1	1	1	1
P29323	1	0	1	1	1
P29279	1	1	1	1	1
P29074	1	0	0	0	0
P28907	1	0	0	1	1
P28827	1	0	1	0	1
P28799	1	1	1	1	1
P28300	1	1	0	1	1
P28161	1	0	1	0	1
P27930	1	1	1	1	1
P27824	1	1	1	1	1
P27797	1	1	1	1	1
P27487	1	1	1	1	1
P27482	1	1	1	1	1
P27348	1	1	1	1	1
P27169	1	1	0	1	1
P27105	1	1	1	1	1
P26992	1	1	1	1	1
P26927	1	0	1	1	1
P26842	1	1	1	1	1
P26572	1	1	1	1	1
P26371	1	0	0	0	0
P26038	1	1	1	1	1
P25940	1	1	1	0	1
P25815	1	1	1	1	1
P25787	1	0	1	1	1
P25774	1	1	1	1	1
P25705	1	0	1	1	1
P25325	1	0	1	1	1
P25311	1	1	1	1	1
P25054	1	0	0	0	0
P24855	1	1	1	1	1
P24821	1	1	1	1	1
P24593	1	0	1	1	1
P24592	1	1	1	1	1
P24534	1	0	1	1	1
P24530	1	1	0	0	1
P24387	1	0	0	1	1
P24158	1	1	1	1	1
P23528	1	1	1	1	1
P23527	1	0	0	1	0
P23526	1	1	1	1	1
P23508	1	0	0	0	0
P23470	1	1	1	1	1
P23434	1	0	1	0	1
P23396	1	0	1	1	1
P23327	1	0	0	0	1
P23284	1	1	1	1	1
P23142	1	1	1	1	1
P23083	1	1	1	1	1
P22891	1	1	1	1	1
P22792	1	1	1	1	1
P22735	1	0	1	1	1
P22732	1	0	1	1	1
P22692	1	1	1	1	1
P22626	1	0	1	1	1
P22532	1	0	1	1	1
P22531	1	0	1	0	0
P22528	1	1	1	1	1
P22492	1	0	0	0	0
P22455	1	0	1	0	1
P22392	1	0	1	1	1
P22352	1	0	1	1	1
P22314	1	1	1	1	1
P22304	1	1	1	0	1
P22223	1	1	1	1	1
P22105	1	1	1	1	1
P22061	1	0	1	1	1
P21964	1	0	1	1	1
P21926	1	0	1	1	1
P21810	1	1	1	1	1
P21802	1	1	1	0	1
P21796	1	1	0	1	1
P21757	1	0	1	0	1
P21709	1	1	1	1	1
P21695	1	1	1	1	1
P21439	1	0	0	0	0
P21399	1	1	1	1	1
P21333	1	1	1	1	1
P21266	1	1	1	1	1
P21108	1	0	0	0	1
P20962	1	0	1	0	1
P20936	1	0	0	0	1
P20933	1	1	1	1	1
P20930	1	0	1	1	1
P20929	1	0	0	0	1
P20848	1	0	0	0	0
P20827	1	1	1	1	1
P20810	1	0	1	1	1
P20774	1	1	1	1	1
P20742	1	1	0	1	1
P20711	1	0	1	1	1
P20671	1	0	0	0	0
P20340	1	1	1	1	1
P20339	1	0	1	0	1
P20338	1	1	1	0	1
P20337	1	0	0	0	1
P20336	1	0	0	0	0
P20333	1	0	1	1	1
P20155	1	0	0	0	0
P20151	1	0	0	1	0
P20142	1	1	0	1	1
P20138	1	1	1	1	1
P20073	1	1	1	1	1
P20062	1	0	1	1	1
P19961	1	1	1	1	1
P19957	1	1	1	1	1
P19835	1	0	1	1	1
P19827	1	1	1	1	1
P19823	1	1	1	1	1
P19801	1	1	1	1	1
P19652	1	1	1	1	1
P19440	1	1	1	1	1
P19438	1	1	1	0	1
P19320	1	1	1	1	1
P19256	1	0	1	1	1
P19087	1	0	0	0	0
P19022	1	1	1	1	1
P19021	1	1	1	1	1
P19013	1	0	1	1	1
P19012	1	0	1	1	0
P18827	1	1	1	0	1
P18669	1	1	1	1	1
P18510	1	1	1	1	1
P18428	1	1	1	1	1
P18206	1	1	1	1	1
P18065	1	1	1	1	1
P18054	1	0	1	1	0
P17936	1	0	1	1	1
P17931	1	1	1	1	1
P17900	1	1	1	1	1
P17844	1	0	0	1	1
P17813	1	1	1	1	1
P17693	1	0	0	0	0
P17405	1	1	1	1	1
P17342	1	1	1	1	1
P17174	1	1	1	1	1
P17066	1	1	0	0	0
P17050	1	1	1	1	1
P16930	1	1	1	1	1
P16870	1	1	1	1	1
P16860	1	0	0	1	0
P16520	1	0	0	0	0
P16444	1	1	1	1	1
P16403	1	1	0	1	1
P16402	1	0	1	1	1
P16401	1	1	1	1	1
P16284	1	1	1	1	1
P16278	1	1	1	1	1
P16234	1	1	1	0	1
P16157	1	0	0	1	1
P16152	1	1	1	1	1
P16112	1	0	1	1	1
P16104	1	0	0	0	0
P16083	1	0	1	0	1
P16070	1	1	1	1	1
P16035	1	1	1	1	1
P15941	1	1	1	1	1
P15924	1	1	1	1	1
P15848	1	1	1	1	1
P15814	1	1	1	1	1
P15586	1	1	1	1	1
P15531	1	1	0	1	1
P15502	1	0	0	0	0
P15328	1	1	1	1	1
P15311	1	0	1	1	1
P15309	1	1	1	1	1
P15291	1	1	1	1	1
P15289	1	1	1	1	1
P15259	1	0	0	0	0
P15169	1	1	0	1	1
P15151	1	1	1	1	1
P15144	1	1	1	1	1
P15121	1	1	1	1	1
P15104	1	1	1	1	1
P15090	1	1	0	1	1
P15086	1	1	0	1	0
P15085	1	1	0	1	0
P14927	1	0	0	0	1
P14784	1	0	1	0	1
P14780	1	1	1	1	1
P14651	1	0	0	0	0
P14649	1	0	1	0	1
P14625	1	1	1	1	1
P14621	1	0	0	0	0
P14618	1	1	1	1	1
P14550	1	1	1	1	1
P14543	1	1	1	1	1
P14410	1	0	0	0	0
P14384	1	1	1	1	1
P14314	1	0	1	1	1
P14209	1	0	1	0	1
P14174	1	1	1	1	1
P14151	1	1	1	1	1
P14138	1	0	0	0	0
P13987	1	0	1	1	1
P13942	1	1	0	0	0
P13929	1	0	0	0	0
P13805	1	0	0	1	0
P13798	1	0	1	1	1
P13797	1	1	1	1	1
P13796	1	1	1	1	1
P13747	1	0	0	1	1
P13727	1	1	1	1	1
P13693	1	0	1	1	1
P13688	1	1	1	0	1
P13671	1	1	1	1	1
P13647	1	0	1	1	1
P13646	1	0	1	1	1
P13645	1	0	1	1	1
P13639	1	1	1	1	1
P13611	1	1	1	1	1
P13598	1	0	1	1	1
P13591	1	1	1	1	1
P13535	1	0	0	1	0
P13533	1	0	0	0	0
P13521	1	1	0	0	1
P13497	1	0	1	0	0
P13489	1	1	1	1	1
P13473	1	1	1	1	1
P13385	1	0	0	0	0
P13284	1	1	1	1	1
P12955	1	1	1	1	1
P12883	1	1	0	0	1
P12882	1	0	0	0	1
P12838	1	0	1	1	1
P12830	1	1	1	1	1
P12821	1	1	1	1	1
P12814	1	1	1	1	1
P12429	1	1	1	1	1
P12277	1	1	1	1	1
P12273	1	1	1	1	1
P12259	1	1	1	0	1
P12111	1	1	1	1	1
P12110	1	1	1	1	1
P12109	1	0	1	1	1
P12104	1	1	0	1	1
P12035	1	0	1	0	0
P11940	1	0	0	1	1
P11908	1	0	0	0	1
P11766	1	1	1	1	1
P11717	1	1	1	1	1
P11684	1	1	1	1	1
P11597	1	1	1	1	1
P11586	1	0	1	1	1
P11488	1	0	0	0	0
P11362	1	1	1	1	1
P11279	1	1	1	1	1
P11234	1	1	1	1	1
P11233	1	1	0	1	1
P11226	1	1	0	1	1
P11168	1	1	0	0	0
P11142	1	1	1	1	1
P11117	1	1	1	1	1
P11055	1	0	0	0	0
P11047	1	1	1	1	1
P11021	1	1	1	1	1
P10912	1	0	1	1	1
P10909	1	1	1	1	1
P10809	1	1	1	1	1
P10768	1	1	1	1	1
P10721	1	1	1	0	1
P10646	1	0	0	0	1
P10645	1	1	1	1	1
P10643	1	1	1	1	1
P10619	1	0	1	1	1
P10599	1	1	1	1	1
P10586	1	1	1	0	1
P10451	1	1	1	1	1
P10412	1	1	1	1	1
P10321	1	0	1	1	1
P10253	1	1	1	1	1
P10153	1	1	1	1	1
P10124	1	1	1	0	1
P10109	1	1	1	1	1
P10092	1	0	0	0	0
P0DUB6	1	0	0	0	0
P0DTE8	1	0	0	0	0
P0DTE7	1	0	1	1	1
P0DSN7	1	0	0	0	0
P0DPH8	1	0	0	0	0
P0DPH7	1	0	0	1	1
P0DP57	1	0	1	1	1
P0DP25	1	0	0	0	0
P0DP24	1	0	0	0	0
P0DP23	1	0	1	1	1
P0DP09	1	0	0	0	0
P0DP08	1	0	0	0	1
P0DP07	1	0	0	0	0
P0DP06	1	0	0	0	0
P0DP04	1	0	0	0	0
P0DP03	1	0	0	0	0
P0DP02	1	0	0	0	0
P0DP01	1	0	1	0	1
P0DOY3	1	0	0	1	1
P0DOY2	1	0	1	0	1
P0DN26	1	0	0	0	0
P0DMV9	1	0	0	0	0
P0DMV8	1	0	1	1	1
P0DMQ5	1	1	1	0	1
P0DML3	1	0	0	0	0
P0DML2	1	0	0	0	0
P0DJI9	1	1	0	1	1
P0DJI8	1	1	0	1	1
P0DJD9	1	0	0	0	0
P0DJD8	1	1	1	1	1
P0DJD7	1	0	0	0	0
P0CG48	1	0	0	0	0
P0CG47	1	0	1	1	0
P0CG39	1	0	0	0	0
P0CG38	1	0	0	0	0
P0CG04	1	0	0	0	0
P0CF74	1	0	0	0	0
P0C7U0	1	1	1	1	1
P0C0S8	1	0	0	1	0
P0C0S5	1	0	1	1	1
P0C0L5	1	1	1	1	1
P0C0L4	1	1	1	1	1
P0C091	1	0	0	0	0
P09972	1	1	1	1	1
P09958	1	1	1	1	1
P09871	1	0	1	1	1
P09681	1	1	0	1	0
P09668	1	0	1	1	1
P09651	1	0	1	1	1
P09622	1	0	0	1	1
P09619	1	1	1	1	1
P09603	1	1	1	1	1
P09564	1	0	1	1	1
P09529	1	0	1	0	1
P09525	1	0	1	1	1
P09493	1	0	1	1	1
P09488	1	0	0	1	1
P09486	1	0	1	1	1
P09471	1	0	0	0	0
P09467	1	1	1	1	1
P09466	1	0	0	1	0
P09417	1	1	1	1	1
P09382	1	1	1	1	1
P09237	1	1	1	1	1
P09228	1	1	0	0	1
P09211	1	1	1	0	1
P09210	1	1	0	0	1
P09104	1	0	0	0	1
P08962	1	0	1	1	1
P08833	1	0	0	1	1
P08779	1	0	1	1	1
P08758	1	1	1	0	1
P08754	1	0	1	1	1
P08729	1	0	0	1	1
P08727	1	0	1	1	1
P08709	1	0	1	1	1
P08697	1	1	1	1	1
P08670	1	1	1	1	1
P08637	1	0	1	1	1
P08603	1	1	1	1	1
P08590	1	0	0	1	0
P08582	1	1	1	1	1
P08572	1	1	1	1	1
P08571	1	1	1	1	1
P08519	1	1	1	1	1
P08493	1	1	1	1	1
P08473	1	1	1	1	1
P08294	1	1	1	1	1
P08263	1	0	1	0	1
P08253	1	1	1	1	1
P08238	1	1	1	1	1
P08236	1	1	1	1	1
P08195	1	0	1	1	1
P08185	1	1	1	1	1
P08183	1	1	1	0	1
P08174	1	0	1	1	1
P08138	1	1	1	0	1
P08133	1	1	1	1	1
P08123	1	0	1	1	1
P08118	1	0	0	1	1
P07998	1	1	1	1	1
P07996	1	1	1	1	1
P07951	1	0	0	0	0
P07911	1	0	1	1	1
P07900	1	1	1	1	1
P07864	1	0	0	1	0
P07858	1	1	1	1	1
P07738	1	0	0	1	1
P07737	1	1	1	1	1
P07711	1	1	1	1	1
P07686	1	1	1	1	1
P07602	1	0	1	1	1
P07478	1	0	1	1	1
P07477	1	0	0	0	0
P07476	1	1	1	1	1
P07451	1	1	0	1	1
P07437	1	0	1	1	1
P07360	1	1	1	1	1
P07359	1	1	1	1	1
P07358	1	1	1	1	1
P07357	1	1	1	1	1
P07355	1	1	1	1	1
P07339	1	1	1	0	1
P07333	1	0	1	1	1
P07307	1	1	1	1	1
P07306	1	0	1	1	1
P07288	1	1	0	1	1
P07237	1	1	1	1	1
P07225	1	1	1	1	1
P07205	1	0	0	0	1
P07204	1	1	1	1	1
P07195	1	1	1	1	1
P07148	1	1	1	1	1
P07108	1	1	1	1	1
P06899	1	0	1	0	1
P06881	1	0	0	0	0
P06870	1	1	1	1	1
P06865	1	0	1	1	1
P06858	1	1	1	1	1
P06753	1	0	1	1	1
P06748	1	0	1	1	1
P06744	1	1	1	1	1
P06734	1	0	1	0	1
P06733	1	1	1	1	1
P06731	1	1	1	1	1
P06727	1	1	1	1	1
P06703	1	0	1	1	1
P06702	1	1	1	1	1
P06681	1	1	0	1	1
P06576	1	1	1	1	1
P06454	1	0	1	1	1
P06396	1	1	1	0	1
P06331	1	1	0	0	1
P06312	1	1	1	1	1
P06310	1	0	0	1	1
P06280	1	1	1	1	1
P05981	1	1	1	1	1
P05976	1	1	0	1	0
P05937	1	1	1	1	1
P05787	1	0	1	1	1
P05783	1	0	1	1	1
P05546	1	1	1	1	1
P05543	1	1	1	1	1
P05452	1	0	1	1	1
P05451	1	1	1	1	1
P05413	1	0	1	0	1
P05387	1	1	1	1	1
P05386	1	1	0	1	1
P05362	1	1	1	1	1
P05186	1	1	1	1	1
P05161	1	0	0	1	1
P05160	1	1	1	1	1
P05156	1	0	1	1	1
P05155	1	1	1	1	1
P05154	1	1	1	1	1
P05109	1	1	1	1	1
P05091	1	1	1	1	1
P05090	1	1	1	1	1
P05067	1	1	1	1	1
P05062	1	1	1	1	1
P05060	1	1	1	1	1
P05026	1	1	1	1	1
P04908	1	0	1	1	1
P04899	1	1	1	1	1
P04792	1	1	1	1	1
P04746	1	1	1	1	1
P04439	1	0	1	1	1
P04433	1	0	0	0	1
P04432	1	0	0	0	0
P04430	1	1	1	1	1
P04406	1	1	1	1	1
P04350	1	0	0	0	0
P04279	1	1	0	1	1
P04278	1	0	1	1	1
P04275	1	1	1	1	1
P04264	1	1	1	1	1
P04259	1	0	1	1	1
P04233	1	1	1	0	1
P04217	1	1	1	1	1
P04216	1	0	1	1	1
P04211	1	1	0	1	1
P04196	1	1	1	1	1
P04180	1	1	1	1	1
P04179	1	1	1	1	1
P04156	1	0	1	1	1
P04155	1	1	1	1	1
P04118	1	0	1	1	1
P04114	1	1	1	1	1
P04085	1	0	1	0	0
P04083	1	1	1	1	1
P04080	1	1	1	1	1
P04075	1	0	1	1	1
P04066	1	1	1	1	1
P04062	1	1	1	1	1
P04004	1	1	1	1	1
P04003	1	1	1	1	1
P03973	1	1	1	1	1
P03952	1	0	0	1	1
P03951	1	1	0	1	1
P03950	1	1	1	1	1
P02810	1	0	0	1	1
P02794	1	1	1	1	1
P02792	1	1	0	1	1
P02790	1	1	1	1	1
P02788	1	1	1	1	1
P02787	1	1	1	0	1
P02774	1	1	1	1	1
P02768	1	0	1	0	1
P02766	1	1	1	1	1
P02765	1	1	1	1	1
P02763	1	1	1	1	1
P02760	1	1	1	1	1
P02753	1	0	1	1	1
P02751	1	1	1	1	1
P02750	1	1	1	1	1
P02749	1	1	1	1	1
P02748	1	1	1	1	1
P02743	1	1	1	1	1
P02741	1	1	1	0	1
P02730	1	1	0	1	1
P02689	1	0	0	0	0
P02679	1	1	1	1	1
P02675	1	1	1	1	1
P02671	1	1	1	1	1
P02656	1	0	1	1	1
P02655	1	0	1	1	1
P02654	1	0	1	1	1
P02652	1	0	1	1	1
P02649	1	1	1	1	1
P02647	1	1	1	1	1
P02585	1	0	0	0	0
P02545	1	1	1	1	1
P02538	1	0	1	1	1
P02533	1	0	1	1	1
P02511	1	0	1	1	1
P02461	1	1	0	1	1
P02458	1	1	0	0	0
P02452	1	1	1	1	1
P02144	1	1	0	0	1
P02100	1	0	0	1	1
P02042	1	1	1	1	1
P02008	1	0	0	1	1
P01906	1	0	0	0	0
P01903	1	0	1	1	1
P01893	1	0	1	1	1
P01889	1	0	0	1	1
P01880	1	0	0	1	1
P01877	1	1	1	1	1
P01876	1	1	1	1	1
P01871	1	0	1	1	1
P01861	1	1	1	1	1
P01860	1	0	1	1	1
P01859	1	1	1	1	1
P01857	1	0	1	0	1
P01834	1	0	1	1	1
P01833	1	1	1	1	1
P01825	1	0	0	0	0
P01824	1	1	0	0	1
P01814	1	0	0	0	1
P01782	1	0	1	1	1
P01780	1	1	1	1	1
P01772	1	1	0	0	1
P01768	1	0	1	1	1
P01767	1	1	0	0	1
P01766	1	0	1	1	1
P01764	1	0	0	0	1
P01763	1	1	0	0	0
P01762	1	0	0	0	1
P01743	1	1	1	1	1
P01742	1	0	1	1	1
P01721	1	1	0	1	1
P01718	1	0	0	1	1
P01717	1	1	1	1	1
P01715	1	0	1	1	1
P01714	1	1	1	1	1
P01709	1	0	1	1	1
P01706	1	0	1	1	1
P01705	1	0	0	1	1
P01704	1	0	1	1	1
P01703	1	0	1	1	1
P01701	1	1	1	1	1
P01700	1	0	1	1	1
P01699	1	0	0	1	1
P01624	1	1	1	0	1
P01619	1	1	1	1	1
P01615	1	1	0	0	0
P01614	1	1	0	0	0
P01611	1	1	0	0	0
P01602	1	1	1	1	1
P01601	1	1	1	1	1
P01599	1	0	1	1	1
P01597	1	1	1	1	1
P01594	1	1	0	0	0
P01593	1	1	1	1	1
P01591	1	1	1	1	1
P01589	1	0	1	0	1
P01350	1	0	0	0	0
P01344	1	1	1	0	1
P01308	1	0	0	0	0
P01275	1	0	0	0	0
P01258	1	1	0	1	1
P01241	1	0	0	1	0
P01236	1	0	0	1	0
P01225	1	1	1	1	1
P01210	1	1	1	0	1
P01160	1	0	0	0	0
P01133	1	1	1	0	1
P01127	1	0	1	0	1
P01042	1	1	1	1	1
P01040	1	1	1	1	1
P01037	1	1	0	1	1
P01036	1	1	1	1	1
P01034	1	1	1	1	1
P01033	1	0	1	1	1
P01031	1	1	1	0	1
P01024	1	1	1	1	1
P01023	1	1	1	1	1
P01019	1	1	1	1	1
P01011	1	1	1	1	1
P01009	1	1	1	1	1
P01008	1	1	1	0	1
P00995	1	1	1	1	1
P00966	1	1	1	1	1
P00918	1	1	1	0	1
P00915	1	1	1	0	1
P00751	1	0	1	1	1
P00749	1	0	1	1	1
P00748	1	1	1	1	1
P00747	1	1	1	1	1
P00746	1	0	1	1	1
P00742	1	1	0	1	1
P00740	1	1	1	1	1
P00739	1	1	0	1	1
P00738	1	1	1	1	1
P00736	1	0	1	1	1
P00734	1	1	1	1	1
P00568	1	0	1	1	1
P00558	1	1	1	1	1
P00492	1	1	1	1	1
P00491	1	1	1	1	1
P00488	1	1	0	1	1
P00450	1	1	1	1	1
P00441	1	1	1	1	1
P00390	1	1	1	1	1
P00352	1	1	1	1	1
P00338	1	1	1	1	1
P00167	1	1	0	0	1
O96033	1	1	1	1	1
O96009	1	1	1	1	1
O95998	1	1	1	1	1
O95980	1	1	1	1	1
O95971	1	1	1	1	1
O95969	1	0	0	1	1
O95967	1	1	1	1	1
O95965	1	0	0	0	0
O95865	1	1	1	1	1
O95841	1	0	1	1	0
O95716	1	0	0	0	1
O95678	1	0	1	1	0
O95633	1	0	1	0	1
O95568	1	0	0	0	0
O95502	1	1	0	0	1
O95497	1	1	1	1	1
O95466	1	0	0	1	1
O95460	1	0	1	1	1
O95450	1	1	0	1	1
O95445	1	1	1	1	1
O95428	1	1	0	1	1
O95402	1	0	0	0	0
O95372	1	0	0	1	1
O95336	1	1	1	1	1
O95297	1	0	1	0	1
O95274	1	1	1	1	1
O95196	1	0	1	0	1
O95185	1	0	1	0	1
O95171	1	1	1	1	0
O95159	1	1	1	1	1
O95154	1	0	1	1	1
O95084	1	0	1	1	1
O94985	1	0	1	0	1
O94973	1	0	0	0	1
O94919	1	1	1	1	1
O94911	1	0	0	0	0
O94910	1	1	1	1	1
O94813	1	0	0	0	1
O94772	1	1	1	0	1
O94760	1	1	1	1	1
O76076	1	1	1	1	1
O76015	1	0	0	0	0
O75955	1	0	1	1	1
O75936	1	1	1	1	1
O75891	1	1	1	1	1
O75888	1	0	0	0	0
O75882	1	1	1	1	1
O75874	1	1	1	1	1
O75830	1	0	0	0	0
O75828	1	0	1	0	0
O75787	1	1	1	1	1
O75629	1	1	0	1	1
O75594	1	1	1	1	1
O75534	1	0	0	0	1
O75531	1	0	1	1	1
O75503	1	1	1	1	1
O75487	1	1	1	1	1
O75390	1	0	0	1	1
O75369	1	1	1	1	1
O75368	1	1	1	1	1
O75351	1	1	1	1	1
O75347	1	0	1	0	1
O75343	1	0	0	0	0
O75340	1	1	1	1	1
O75339	1	1	1	1	1
O75309	1	1	1	1	1
O75223	1	1	1	1	1
O75173	1	0	0	1	1
O75144	1	0	1	1	1
O75131	1	1	1	1	1
O75112	1	0	0	0	0
O75093	1	0	0	1	1
O75071	1	1	1	1	1
O75022	1	0	0	0	0
O75015	1	0	1	1	1
O60888	1	1	1	1	1
O60814	1	0	0	1	1
O60664	1	1	1	1	1
O60635	1	1	1	1	1
O60613	1	0	1	1	1
O60494	1	1	1	1	1
O60437	1	0	1	1	1
O60361	1	0	0	0	0
O60279	1	1	1	0	1
O60235	1	1	1	1	0
O60234	1	1	1	1	1
O60225	1	0	0	0	0
O43896	1	0	0	0	0
O43895	1	1	1	1	1
O43866	1	1	1	1	1
O43813	1	0	0	1	1
O43768	1	0	1	0	1
O43707	1	1	1	1	1
O43692	1	0	1	1	1
O43653	1	1	1	1	1
O43633	1	1	1	1	1
O43598	1	0	0	1	1
O43570	1	1	0	1	1
O43567	1	1	1	0	1
O43505	1	1	1	1	1
O43493	1	0	1	1	1
O43490	1	1	1	1	1
O43488	1	0	1	1	1
O43451	1	0	1	1	1
O43432	1	0	0	0	0
O43405	1	0	1	1	1
O43399	1	0	1	1	1
O43396	1	1	1	1	1
O43365	1	0	0	0	0
O43291	1	1	1	1	1
O43286	1	0	0	0	0
O43278	1	1	1	1	1
O43175	1	0	1	1	1
O43155	1	1	1	1	1
O15511	1	0	1	1	1
O15393	1	0	1	1	1
O15389	1	0	0	1	1
O15381	1	0	0	0	0
O15273	1	1	1	1	0
O15240	1	1	1	1	1
O15231	1	0	1	1	1
O15230	1	1	1	1	1
O15204	1	1	0	1	1
O15197	1	1	1	1	1
O15078	1	0	0	0	0
O15072	1	1	0	0	0
O14798	1	1	1	0	1
O14791	1	1	0	1	1
O14776	1	0	0	0	0
O14773	1	1	1	1	1
O14745	1	1	1	1	1
O14672	1	1	1	0	1
O14618	1	0	0	1	1
O14558	1	0	0	1	1
O14498	1	1	1	1	1
O00764	1	1	1	1	1
O00757	1	1	0	1	1
O00754	1	1	1	1	1
O00592	1	1	1	1	1
O00584	1	0	1	1	1
O00560	1	1	1	1	1
O00533	1	1	1	1	1
O00526	1	1	1	1	1
O00499	1	1	1	0	1
O00468	1	1	1	1	1
O00462	1	1	1	1	1
O00461	1	0	1	1	1
O00391	1	1	1	1	1
O00339	1	0	0	0	0
O00264	1	1	1	1	1
O00253	1	0	1	0	1
O00244	1	0	1	1	1
O00241	1	1	1	1	1
O00194	1	0	0	1	1
O00187	1	1	1	1	1
O00182	1	0	1	1	1
O00178	1	0	0	0	0
O00115	1	1	1	1	1
F5H284	1	0	0	0	0
C9JVW0	1	1	1	0	1
BATXSVSP13	1	0	0	0	0
BATXSVSP12	1	0	0	0	0
BATXCRISP1	1	0	0	0	0
B9A064	1	0	1	0	1
B5MD39	1	0	0	0	0
B3EWG6	1	0	0	0	0
B3EWG5	1	0	0	0	0
B3EWG3	1	0	1	0	1
A8MUU1	1	0	0	0	0
A8MUH7	1	0	0	0	0
A8MTJ3	1	0	0	0	0
A8K2U0	1	1	1	1	1
A7E2Y1	1	0	0	0	0
A6NNZ2	1	0	0	0	0
A6NMZ7	1	1	0	0	0
A6NMY6	1	0	0	0	0
A6NIZ1	1	0	0	0	0
A6NI73	1	1	1	1	1
A6NHG4	1	0	0	0	0
A6NGU5	1	0	0	0	0
A6H8Y1	1	0	0	0	0
A5A3E0	1	0	0	0	0
A2NJV5	1	0	0	1	0
A0M8Q6	1	0	1	1	1
A0AVF1	1	0	0	0	0
A0A2R8Y619	1	0	0	0	0
A0A0J9YXX1	1	0	0	1	1
A0A0J9YX35	1	0	1	1	1
A0A0J9YVY3	1	0	0	0	0
A0A0G2JMI3	1	0	0	0	0
A0A0C4DH73	1	0	0	1	1
A0A0C4DH72	1	0	0	0	0
A0A0C4DH69	1	0	0	0	0
A0A0C4DH68	1	0	0	0	1
A0A0C4DH67	1	0	1	1	1
A0A0C4DH55	1	0	0	0	1
A0A0C4DH42	1	0	0	0	0
A0A0C4DH41	1	0	1	1	0
A0A0C4DH39	1	0	0	0	1
A0A0C4DH38	1	0	1	1	1
A0A0C4DH36	1	0	1	1	1
A0A0C4DH35	1	0	1	1	1
A0A0C4DH34	1	0	1	1	1
A0A0C4DH33	1	0	0	0	1
A0A0C4DH32	1	0	1	0	1
A0A0C4DH31	1	0	1	1	1
A0A0C4DH30	1	0	1	0	0
A0A0C4DH29	1	0	1	1	1
A0A0C4DH26	1	0	0	0	0
A0A0C4DH25	1	0	1	1	1
A0A0C4DH24	1	0	1	1	1
A0A0B4J2H0	1	0	0	0	1
A0A0B4J2D9	1	0	1	1	1
A0A0B4J2A2	1	0	0	1	0
A0A0B4J1Z2	1	0	0	1	0
A0A0B4J1Y9	1	0	1	1	1
A0A0B4J1Y8	1	0	0	1	1
A0A0B4J1X8	1	0	0	1	1
A0A0B4J1X5	1	0	1	1	1
A0A0B4J1V7	1	0	0	0	0
A0A0B4J1V6	1	0	1	0	1
A0A0B4J1V2	1	0	0	1	1
A0A0B4J1V1	1	0	0	0	1
A0A0B4J1V0	1	0	1	1	1
A0A0B4J1U7	1	0	1	1	1
A0A0B4J1U3	1	0	1	0	1
A0A0A0MT36	1	0	1	1	1
A0A0A0MS15	1	0	1	1	1
A0A0A0MS14	1	0	1	1	1
A0A0A0MRZ8	1	0	1	1	0
A0A0A0MRZ7	1	0	0	0	0
A0A087WW87	1	0	1	1	1
A0A087WSZ0	1	1	0	1	1
A0A087WSY6	1	0	1	1	1
A0A087WSY4	1	0	0	0	1
A0A087WSX0	1	1	1	1	1
A0A075B767	1	0	0	0	0
A0A075B759	1	0	0	0	0
[truncated: 4,013 more rows]

## Sheet: Supplementary table 2 
Table 2: Normalised, imputed, relative protein abundances for pyelonephritis (PN) patient 78 (Patient 1) with ANOVA p-values. P-values < 0.05 are considered significant
Abbreviation: D: Direct freezing, F: Freezing and thawing (3 cycles), 4_30: 4°C for 30 minutes, 4_3: 4°C for 3 hours, RT_30: RT for 30 minutes, 4_3: RT for 3 hours
Gene name (Protein group)	78_D_1	78_D_2	78_D_3	78_F_1	78_F_2	78_F_3	78_4_30_1	78_4_30_2	78_4_30_3	78_4_3_1	78_4_3_2	78_4_3_3	78_RT_30_1	78_RT_30_2	78_RT_30_3	78_RT_3_1	78_RT_3_2	78_RT_3_3	P-Value(ANOVA)
TMA7B;TMA7	-5.05857	-3.94557	-3.99906	-4.58695	-3.38585	-5.06521	-5.22079	-2.64223	-3.69288	-5.01967	-4.35546	-4.79533	-4.47018	-4.39378	-3.76733	-3.98589	-3.32284	-4.36024	0.726085
IGKV3-7	0.74803	2.39765	2.32406	2.49307	2.69707	2.47488	2.43188	2.55127	2.45953	2.50881	3.02591	2.65808	2.76271	2.68872	2.57528	2.59884	2.69797	2.64071	0.135806
IGLV4-69	-0.993153	-1.63987	-0.8165	-1.24731	-1.17914	-0.833713	-1.26684	-0.525545	-0.446719	-1.39901	-0.646446	-0.689987	-0.821631	-1.03431	-0.958685	-1.02064	-0.871956	-0.694414	0.702738
IGLV8-61	2.69395	2.26478	2.87069	2.62865	2.52655	2.46586	3.00423	2.83376	2.66714	1.95111	2.21133	3.79163	3.25582	3.51175	3.48398	2.30023	3.7868	1.90327	0.518651
IGLV4-60	-3.62153	-3.1518	-3.52077	-3.17763	-1.84027	-3.12388	-2.28931	-3.33481	-3.24833	-3.25469	-2.84121	-3.25811	-3.42916	-3.30523	-3.44248	-3.59662	-2.73378	-3.41456	0.414614
IGLV10-54	-3.16073	-3.1422	-3.46825	-3.66656	-3.64411	-2.76347	-2.03213	-3.00465	-1.92384	-2.71798	-1.85764	-4.26129	-1.99814	-2.37677	-3.84318	-2.08562	-2.85932	-4.51566	0.716759
IGLV7-46	0.961447	1.09028	1.05265	1.07555	0.78199	0.98839	0.83583	0.980236	1.191	0.758193	0.989981	0.443275	0.817226	0.673395	1.09792	1.23441	1.05205	1.1581	0.151875
IGLV5-37	1.34435	-1.21058	1.02868	1.2819	1.47132	0.894664	-0.246631	0.811417	0.619225	-1.11661	1.63873	1.07645	-0.838175	-0.654902	-1.95154	-0.680344	-0.771258	1.51311	0.218239
IGLV2-18	3.80484	3.61189	3.43329	3.47565	3.48345	3.33327	4.07577	3.32927	3.71196	3.77299	3.18555	3.58591	3.44099	4.29361	3.54943	3.82041	3.71221	3.17679	0.811198
IGLV3-16	-0.894632	-0.649839	-0.616266	-0.331161	-0.805149	-0.930428	-0.811308	-0.388948	-0.623659	-0.332835	-0.706564	-0.779972	-0.0108181	-0.764935	-0.803542	-0.30086	-0.842757	-0.194664	0.878908
IGLV3-12	2.78305	2.82775	3.18965	3.07843	0.949605	2.8125	2.9609	3.24531	2.99238	2.52942	3.09437	2.97466	3.39996	2.44532	2.55855	1.42529	1.8051	3.20125	0.477532
IGLV3-10	2.6915	2.60175	2.5735	2.68499	2.65491	2.54329	2.92872	2.72341	2.75708	2.27522	3.01898	2.95477	2.7294	2.53095	2.88134	2.40103	2.68984	2.98922	0.91145
IGLV3-9	2.96482	3.25557	3.06106	3.02025	3.11598	3.18535	3.20935	3.26483	3.33973	3.10581	3.297	3.16706	3.18723	2.81061	3.31146	2.99727	3.11735	3.47592	0.755223
IGKV2-28;IGKV2D-28	3.60481	3.69731	3.26365	3.28014	3.46755	3.39729	3.61882	3.19106	3.50391	3.57178	3.60524	3.26267	3.51885	3.70026	3.62172	3.48554	3.48623	3.45174	0.620324
IGHV3-64	0.494688	0.926045	0.542984	0.911983	0.940603	0.731751	1.24165	0.967023	0.595887	0.699919	0.992886	0.567723	0.612995	1.69091	0.344309	1.06546	0.641615	0.993403	0.926573
IGHV4-4	-0.422868	-1.29146	-0.76185	-0.915065	-1.08584	-0.758621	-0.616648	-1.02164	-1.60115	-0.791938	-1.56387	-0.527666	-0.594172	-0.598267	-0.417264	-0.362619	-1.4827	-2.0432	0.58444
IGKV2D-29	5.58866	5.25591	5.26982	5.2941	5.31882	5.34544	5.70394	5.43242	5.46987	4.98651	5.30085	5.65828	5.55302	5.49404	5.54619	5.32467	5.61967	4.98307	0.591023
IGKV1-27	0.557357	-0.819861	-0.592509	-0.186716	-0.334294	0.216428	0.40879	0.457758	0.012898	-0.323232	0.423412	0.571323	-0.177978	-0.102441	1.13415	0.658981	0.50958	-0.431064	0.708253
IGKV2D-30	-1.25296	-0.802918	-1.70258	-1.62085	-1.50215	-1.39175	-1.49317	-0.542258	-1.17728	-0.877965	-1.21344	-1.29199	-0.788042	-1.55567	-1.43284	-1.50842	-1.28314	-1.47053	0.615668
IGKV1-37;IGKV1D-37	0.572571	0.0266043	0.00918692	0.364267	-0.248226	0.433983	0.154389	0.127755	-0.146708	0.313092	0.389179	-0.049178	0.286334	-0.12108	0.426609	0.290615	-0.132906	0.945879	0.920791
IGLV5-45	2.85159	2.94013	2.5946	2.66506	2.80906	2.85171	2.90973	2.63191	2.86215	2.63486	3.02424	2.79057	2.84164	2.77294	2.39985	2.7034	2.66976	3.03749	0.92756
IGHV4-30-2	-1.91143	-3.40153	-2.40533	-2.30973	-1.67528	-2.17852	-2.30656	-1.71625	-3.10811	-1.98684	-2.00415	-2.97804	-1.72664	-2.51262	-1.84528	-1.55383	-2.98315	-2.88987	0.85188
IGKV3D-15	1.49649	0.967983	2.21784	1.32357	1.41216	1.09871	1.70947	2.38652	1.40749	0.85206	1.09828	2.69243	1.78692	1.59082	2.65843	0.599135	2.74952	0.849914	0.84131
IGKV1D-8	0.328175	0.14966	-0.277759	-0.222372	0.337044	0.424163	0.211303	-0.452174	-0.0818261	0.35937	0.698786	-0.140085	-0.0159818	0.912058	0.299168	0.675597	-0.538556	0.634128	0.776143
IGKV2-40;IGKV2D-40	1.10206	1.42125	0.480397	0.804825	0.940658	1.09675	1.07387	0.917025	1.20497	1.36428	1.34565	0.360394	0.652899	1.69829	1.06905	1.24525	1.29352	0.867717	0.987194
IGHV1-45	-0.289984	-0.647767	-0.646252	-0.239113	-0.333182	-0.716643	-1.0435	0.154201	-0.545108	-0.571437	-0.448921	-0.705518	-0.372558	0.395939	-0.884556	-0.349232	-0.851057	-0.659312	0.924759
IGHV3-49	2.3371	2.58011	2.34638	2.35162	2.32062	2.38846	2.35844	2.24588	2.45612	2.29365	2.58562	2.28188	2.65131	2.46811	2.53616	2.44782	2.4654	2.57292	0.235759
IGKV6D-21	-0.886962	-0.562497	-0.331009	-0.447692	-0.349771	-0.892764	-0.598063	-0.453805	-0.189079	-0.661115	-0.294569	-0.263949	-0.00767733	-0.669567	0.0672871	-0.543604	-0.300659	-0.327789	0.563374
IGKJ1	2.64849	3.00205	2.69364	2.76121	2.84696	2.52999	2.65631	2.51806	2.70493	2.52788	2.55539	1.79612	2.38035	2.75817	1.89636	2.85268	2.50906	2.88671	0.216808
IGLV1-36	1.81035	1.4722	1.37575	1.12015	1.24021	1.62569	1.58362	1.09508	0.979461	1.709	1.7296	1.07176	1.31094	1.92723	1.35858	1.24392	0.682547	1.89481	0.808793
IGHV6-1	1.75609	1.51781	1.82101	1.59605	1.60102	1.4897	1.50167	1.83318	1.5384	1.12526	1.39528	1.58904	1.44753	0.597424	1.61666	1.10264	1.33878	1.63375	0.344642
IGHV3-15	0.143201	0.398148	0.821937	0.694531	0.331151	0.844842	0.543885	0.997764	0.206231	-0.251854	0.918137	1.13691	0.335287	0.44774	0.230946	0.185229	0.301007	0.895912	0.952188
IGHV3-21	-3.79932	-3.72391	-3.08446	-2.54907	-4.45398	-3.55441	-3.85974	-2.56202	-2.92267	-3.63488	-2.94922	-3.99623	-4.14179	-0.489058	-4.16521	-2.07539	-4.54195	-3.88675	0.973259
IGHV2-26	-0.229592	-0.532664	-0.463015	-0.508886	-0.347965	-0.258177	-0.35622	-0.793171	-0.409877	-0.431124	-0.358042	-0.727885	-0.506886	-0.168034	-0.723418	-0.0409525	-0.938739	-0.649464	0.960218
IGHV3-73	4.52108	4.66596	4.42676	4.59259	4.52831	4.3389	4.48265	4.73809	4.39189	4.4518	4.62911	4.59766	4.71089	4.62729	4.39349	4.55541	4.70378	3.98407	0.925957
IGHV3-74	3.42056	3.65281	3.44081	3.4265	3.52734	3.57589	3.59937	3.50015	3.7148	3.45519	3.82881	3.49542	3.60114	3.77589	3.5707	3.62608	3.4185	3.95052	0.758425
IGHV3-43	3.2817	3.26162	3.35174	3.11226	3.36674	3.49781	3.43893	3.39806	3.11756	3.51838	3.37365	3.8837	3.63384	3.72419	3.81729	3.65372	3.82371	3.93291	0.00765889
IGLV9-49	0.488713	0.886769	0.813943	0.663111	0.825665	0.742723	0.516589	1.06427	0.640554	0.375866	0.693727	0.697247	0.701074	0.752137	0.494107	0.344339	0.785341	0.939828	0.936392
IGHV3-72	5.74966	5.41643	4.99674	5.15653	5.29824	5.26037	5.80942	5.96027	5.17227	5.603	5.62076	5.85536	6.0803	5.70962	5.95611	5.55218	5.52329	5.83446	0.087197
GATD3B;GATD3	-0.18881	-1.28097	-0.195679	-1.42414	-1.55617	-1.32166	-0.418926	-1.24224	-0.71223	-0.992625	-0.657735	-0.266747	-1.4334	-1.05342	-0.691644	-1.09462	-1.71613	-0.826942	0.148909
IGKV1D-13;IGKV1-13	1.35058	1.09696	0.842865	1.00319	0.8867	1.31936	1.38339	0.812661	1.03066	1.10328	1.38691	1.16565	1.24541	-0.158973	1.16991	1.33348	0.861062	1.44485	0.733777
IGHV1-69D	-1.73985	-3.65688	-4.16191	-3.42923	-2.19411	-1.63012	-1.4343	-2.07977	-3.73126	-1.88721	-1.92002	-3.23581	-3.42962	-0.258885	-1.94991	-2.7894	-3.27963	-3.09748	0.697414
IGKV6-21	1.61324	1.68113	1.93352	1.79241	1.45589	1.8891	1.26909	1.69673	1.59613	1.78537	1.94466	1.10542	1.8331	1.50581	1.69983	1.88267	2.03883	2.17943	0.277003
IGKV3D-20	3.33091	2.73361	3.44022	2.88781	3.43069	3.56565	3.41312	3.53779	4.05082	2.68211	3.19358	4.27015	4.08573	4.53024	4.24946	2.93473	4.09723	2.5727	0.17112
IGHV1-3	-1.99873	-1.96802	-1.21223	-1.803	-1.7499	-1.82025	-0.754283	-1.00952	-1.93602	-1.0483	-1.70776	-1.42216	-1.33003	0.450562	-0.724147	-1.40086	-1.90069	-1.68942	0.087966
IGHV1-18	0.361939	-0.163906	-0.501385	0.314977	0.462241	0.670993	0.176847	-0.167802	-0.0787021	0.0779734	0.833927	-0.238212	0.293248	0.892667	-0.108965	0.959595	-0.501503	0.199432	0.660706
IGHV3-20	-1.72902	-2.27093	-2.62279	-1.89754	-2.49151	-1.99198	-1.60803	-2.0136	-2.74355	-2.38637	-1.52156	-2.75387	-2.08589	-2.79269	-2.17346	-2.61976	-2.53171	-1.66291	0.991585
IGHV1-24	-2.04058	-3.29579	-2.8152	-2.98476	-2.69952	-2.73378	-2.51964	-2.84934	-2.94233	-1.79928	-2.73955	-2.85573	-2.22431	-0.968973	-2.9637	-1.94384	-2.75981	-2.50625	0.60134
IGHV4-28	0.14119	0.488908	-0.326772	-0.237804	0.111276	-0.0595506	0.645376	0.677239	0.339919	0.832392	0.901207	-0.337377	0.285169	2.4935	0.539706	0.645261	-0.231082	-0.411205	0.288039
IGHV3-35	3.44921	3.38653	3.47143	3.38211	3.44744	3.44213	3.5805	3.8785	3.79751	3.47764	3.69751	4.25585	3.67467	3.86708	3.17018	3.72175	4.07956	2.83446	0.676921
IGHV3-38	2.14973	1.01823	2.04587	2.49941	2.20552	1.68184	2.59535	2.36104	2.03914	2.16226	2.41909	1.61612	1.74092	3.17789	2.01173	1.58151	2.02088	2.16263	0.678467
IGHV5-51	2.74524	2.76566	2.4601	2.62547	2.76326	2.71927	2.97349	2.65107	2.61321	2.86133	3.09291	2.8826	2.61578	2.8369	2.89185	3.007	2.69247	2.99274	0.235676
IGHV2-70D	2.2514	2.59717	2.30102	2.28241	2.38352	2.14306	2.32708	2.30669	2.29116	2.27013	2.39614	1.99394	2.3418	2.33534	2.20157	2.49175	2.39444	2.73443	0.18827
IGKV3D-7	2.6378	2.77937	2.69253	2.68335	2.64112	3.16653	2.65435	2.64948	2.63295	2.76772	3.08821	2.57869	2.74591	2.63098	2.65685	2.73061	2.70382	2.6452	0.678346
IGKV1-8	2.51796	2.38462	1.9836	2.30321	2.29014	2.50142	2.50574	2.2587	2.45581	2.25674	2.72667	2.25638	2.62428	2.72308	2.64294	2.52287	2.48509	2.48075	0.238374
IGKV2-24	4.00729	3.33125	3.58753	3.62626	3.31159	3.49801	4.02807	3.48674	3.86115	3.40288	3.86055	3.37046	3.7137	3.44517	3.14328	3.63245	3.62868	3.80214	0.536432
IGKV1-12;IGKV1D-12	2.94245	3.32562	2.87191	3.09782	3.0297	3.26528	3.26558	2.25374	3.06355	3.1823	3.22407	2.68755	3.38738	3.70243	3.01066	3.21466	2.71522	2.85151	0.517351
IGLV5-39	1.18383	0.441291	0.754108	0.404215	0.846892	0.240278	1.37325	0.692889	1.01161	0.207699	0.088501	1.47478	0.252524	0.263352	1.07587	0.611238	1.11694	0.213748	0.758252
IGHV3-64D	2.5171	2.5974	2.66583	2.70079	2.56344	2.66551	2.84538	2.80846	2.8712	2.74958	2.95788	2.82784	2.58667	3.79276	2.80084	2.87285	2.81412	2.67671	0.401891
IGHV5-10-1	-1.45168	-1.9675	-0.918923	-1.07023	-0.906919	-1.23549	-1.01003	0.104092	-1.50771	-0.629055	-0.381737	-1.56901	-1.01084	1.04322	-0.809292	-0.436203	-0.64468	-1.91484	0.553623
MMP24OS	-4.35645	-3.3178	-3.71068	-4.10665	-4.59149	-3.15513	-3.63411	-4.04657	-3.91153	-3.40984	-3.0245	-4.08013	-3.49526	-3.84716	-3.38714	-3.09014	-3.01359	-3.24196	0.294106
ERFL	1.95347	1.33123	1.89124	1.39363	1.22854	1.41078	2.59183	2.08675	1.9692	0.888105	1.16139	2.07343	1.14235	1.12047	1.51627	1.63629	0.339363	1.44968	0.095344
UBA6	-1.45603	-1.83099	-1.95292	-1.71573	-1.35564	-1.12909	-2.0213	-1.66861	-1.46869	-1.31765	-1.65108	-1.83639	-2.07652	-1.10169	-1.54508	-1.68231	-2.06377	-1.85913	0.554722
IGLC7	0.356835	0.16791	0.300911	0.21075	0.269701	0.214335	0.993911	0.570011	0.403939	-0.151181	0.443891	0.479587	0.137016	0.161057	-0.226761	0.222817	0.144822	0.821897	0.166253
SHTN1	1.47718	1.08264	-0.248792	-0.000645108	-0.369536	-0.155078	-0.150132	1.19345	0.0126625	1.35199	-0.508421	-0.442503	1.30625	2.03422	1.04786	-0.404612	-0.0948452	-0.191464	0.0761637
SLC5A10	-0.853681	-1.03698	-0.769388	-0.873913	-0.952958	-1.11641	-0.411531	-1.07145	-1.05736	-1.07529	-0.762539	-1.05267	-0.847656	-0.94766	-1.03355	-0.557195	-0.285617	-0.556812	0.0662438
SSC5D	-2.42614	-1.25202	-2.09321	-2.4297	-2.12164	-1.49601	-1.93711	-2.51728	-1.96276	-2.15136	-1.88453	-2.29878	-2.55265	-2.08191	-2.36162	-0.974326	-2.61337	-2.01747	0.879847
GSAP	-0.0458042	-0.0720128	0.115491	-1.84769	-0.530099	-2.01744	-2.467	-0.0473882	-0.554161	-0.355373	-2.3313	-2.24589	-3.5453	-1.87444	-1.49993	-2.29938	-2.10051	0.00541266	0.216682
WDR91	-0.896379	-0.691545	0.0629406	-0.743345	-1.02104	-0.345453	0.179597	-0.861638	-0.302007	0.223705	0.0123722	-0.588265	-0.664014	-0.407149	-1.04187	0.452906	0.235122	0.246112	0.0579654
FITM1	-0.883098	-0.509833	-0.874915	-1.77963	-1.08509	-1.56886	-0.613469	-0.241435	-1.15791	-0.330358	0.109858	0.340585	-0.0922826	-0.762174	-0.435431	-1.24652	0.768128	-0.559059	0.0653964
TEX52	-4.7255	-4.74325	-3.89408	-4.13014	-4.57204	-4.45704	-4.55334	-4.22668	-4.54487	-2.61737	-4.55408	-4.14058	-4.4964	-3.53115	-4.35912	-4.20874	-4.62314	-4.85444	0.519662
ASPDH	-2.25601	-3.59791	-1.90785	-3.68002	-3.48719	-3.81188	-2.01828	-3.35783	-2.08404	-3.67322	-4.23391	-3.43008	-3.81483	-3.5631	-3.45524	-2.02377	-3.6194	-3.47489	0.0932624
PGP	-0.204593	-0.568462	-0.906695	-0.909699	-0.42644	-0.38248	0.068263	-0.948991	-0.244521	-0.151405	-0.0539099	-0.64892	-1.12198	-0.0469799	-0.459044	-0.258472	-1.22921	-0.414153	0.913196
EFCAB10	0.904807	-2.29389	-2.92859	-0.812474	-3.9605	-1.00337	-3.05327	-3.49799	-0.633132	-4.3389	-0.593867	-2.67219	-0.242317	-2.80667	-0.853342	-1.98652	-2.51218	-0.834992	0.914108
GLTPD2	0.573662	-0.459389	-0.128724	-0.188947	-0.0278543	-0.312626	0.13697	-0.45676	0.298702	-0.427427	-0.335843	-0.54569	-0.16586	-0.421865	-0.593982	-0.449587	0.223443	-0.330933	0.485182
LILRA5	2.87114	2.74655	2.6551	2.70025	2.58435	2.44464	2.53481	2.86229	2.79458	2.49657	2.88686	2.70133	1.95569	2.56377	2.2231	2.4745	2.20809	2.85935	0.120604
SHISA7	-5.33001	-3.81586	-4.89026	-5.16986	-4.22002	-3.88213	-5.03809	-4.54421	-4.76786	-5.3266	-2.83801	-5.72082	-5.47716	-5.41059	-5.09497	-5.49556	-5.48538	-5.56727	0.49804
WASHC1;WASH4P;WASH3P;WASH2P;WASH6P	-2.24835	-3.21578	-2.96167	-3.12436	-3.05814	-3.1285	-2.18392	-3.0804	-3.17473	-3.22187	-2.39967	-1.95015	-3.12519	-1.91196	-3.04787	-2.17291	-2.77545	-2.98965	0.813234
A2ML1	0.0174386	0.851976	1.38231	0.390898	1.05728	1.37421	1.35053	1.2639	0.620489	1.82152	1.42869	1.67657	0.741904	1.27371	1.71044	1.22094	1.46233	0.107293	0.43282
HEPACAM2	-2.58354	-3.79883	-3.90618	-3.67299	-3.91814	-4.00359	-4.55116	-4.19126	-2.3106	-4.11911	-3.66795	-4.13021	-3.61745	-3.89195	-4.31435	-3.77845	-4.33171	-4.50666	0.741655
BTNL10P	-1.7105	-1.54939	-1.68145	-2.17416	-1.45661	-1.96119	-1.59824	-1.92065	-2.10466	-1.91618	-1.9707	-2.00654	-0.484644	-1.77016	-1.92027	-2.07566	-1.58482	-0.240873	0.577046
PHF20L1	-1.72774	-1.73107	-1.26192	-1.22958	-1.38313	-1.44704	-1.44388	-1.43154	-1.65057	-1.44624	-1.56802	-1.18202	-1.85223	-1.61344	0.0761887	-1.01718	-0.179684	-1.24786	0.505302
SNRPGP15;SNRPG	-1.98167	-1.66763	-2.02918	-1.72527	-1.88533	-1.7906	-1.78096	-1.87947	-1.48756	-1.2834	-2.07884	-1.8199	-1.72184	-0.0723439	-1.1937	-1.46121	-2.13527	-1.96969	0.175223
FAM25A;FAM25C;FAM25G	-4.92747	-4.936	-4.21003	-4.04011	-3.92966	-5.01877	-3.16658	-4.64755	-4.64978	-0.7666	-5.0611	-4.11358	-3.83302	-3.57185	-3.87575	-4.55331	-4.17252	-5.21775	0.589368
SEC14L6;SEC14L4	-1.28303	-3.99707	-4.48005	-4.54234	-2.85584	-2.548	-1.64818	-5.93815	-2.49969	-4.92829	-4.24784	-5.33844	-3.70709	2.93655	-2.82279	-4.06317	-4.60487	-4.19042	0.355053
IGLL5	6.06586	6.48548	6.05927	6.24708	6.10357	6.152	6.12353	6.41852	6.13165	6.19233	6.39084	5.9907	6.33854	6.11197	6.41696	6.32641	6.39184	5.987	0.974297
INAFM1	-0.994683	-1.52649	-0.957313	-0.41498	-1.50777	-1.12494	-0.278634	-0.964509	-1.01745	-1.06277	-0.54196	-1.80172	-0.826378	-1.21574	-0.289339	-0.908554	-1.21196	-1.21116	0.77902
NACA	0.201796	0.720582	-0.0167549	0.105989	0.245951	0.447522	-0.221433	-0.224694	0.586848	0.60497	0.248725	-0.415381	-0.0616533	0.332562	0.323601	0.260555	-0.0645648	0.679151	0.952616
PRR23D1;PRR23D2	-2.17216	-2.12269	-2.56652	-2.22777	-2.13746	-1.44362	-2.06076	-1.30563	-1.9513	-2.02369	-2.28655	-1.7937	-1.88856	-2.31464	-2.22605	-2.24976	-2.20266	-0.571387	0.662239
SUMO1P1;SUMO1	2.51785	1.74373	1.74447	2.87441	2.79664	2.68561	1.40886	2.93733	2.58426	2.0309	3.00757	2.83798	1.72338	3.06732	1.62894	1.34932	1.6571	3.0805	0.617416
GOLGA8R	-2.75595	-0.386992	-3.84208	-3.49247	-2.69062	-3.76916	-3.3859	-3.18334	-3.33712	-1.80732	-2.2829	-3.23428	-3.06947	-2.88724	-2.76218	-3.07327	-3.13931	-0.945843	0.646398
SMIM22	-5.94682	-5.68147	-3.69867	-5.68395	-5.59824	-2.82968	-5.71748	-4.93157	-5.0329	-5.47478	-5.21102	-5.10736	-5.22445	-5.15492	-5.5188	-5.36963	-4.5238	-6.12819	0.957073
DNASE2	2.15016	2.18137	2.01996	1.99855	2.06184	1.88387	2.12994	2.02087	2.12654	1.98224	2.08899	1.86559	2.10865	2.26223	2.05525	2.03032	2.14155	2.44189	0.221224
AGPS	-5.75876	-4.78073	-5.50152	-5.21133	-5.58992	-4.67092	-5.33565	-4.32573	-5.46533	-5.44296	-5.04931	-5.35918	-4.96715	-4.67984	-5.55104	-5.43347	-5.43764	-4.9413	0.938003
TK2	1.39009	1.46686	0.975144	0.813953	0.541477	0.431387	1.48141	1.29047	1.03967	1.36522	0.875091	1.09086	1.27282	1.23945	1.58327	-0.21561	0.368086	1.55242	0.127262
DDX39A	0.75231	1.13484	0.437546	0.465819	0.294935	0.290581	0.46075	0.889328	0.574124	0.0129021	0.377879	1.12944	0.76241	1.14653	0.929933	0.54851	0.754886	0.742799	0.295169
PDLIM1	1.22862	1.44112	1.00187	1.35853	1.28434	1.11034	1.61386	1.14131	1.15242	0.960128	1.3185	1.41003	1.37047	1.20932	1.60164	1.10335	1.48168	1.68865	0.826492
ACOT7	-0.815602	-1.47975	-1.98159	-1.49062	-1.77859	-1.62382	-0.876524	-1.51842	-1.67734	-1.25231	-1.04313	-1.35345	-1.89085	-1.27148	-0.94673	-1.89893	-1.72473	-1.0341	0.844406
MYO1C	-1.46818	-0.826763	-1.36782	-1.93158	-0.941785	-1.25231	-1.29531	-1.50623	-1.31237	-1.37781	-1.2127	-1.14218	-1.61528	-1.12338	-1.50232	-1.12198	-1.4357	-1.32329	0.945487
MYO1F	-1.14479	-1.17888	-1.51342	-0.930217	-1.56642	-1.78855	-0.84099	-1.38615	-0.466417	-1.34685	-1.20065	-1.95182	-0.671457	-1.85744	-1.40993	-1.2779	-1.13205	-1.86296	0.600916
SNAP23	-1.01168	-1.39142	-1.36298	-0.55641	-1.52583	-1.79686	-1.20929	-1.7906	-1.36944	-1.16631	-1.15068	-1.46451	-1.65306	-1.06408	-1.20475	0.00492419	-1.80865	-1.22339	0.934633
AIP	-0.132216	-0.943708	-0.471121	-1.20037	-0.98441	-1.06614	0.134974	-0.422319	-1.4117	0.718201	-0.539427	-1.62372	0.34779	-1.96382	-0.702003	2.59151	-1.70863	-1.45991	0.967119
KCNK1	-1.72952	-0.488935	-1.95312	-2.18257	-2.27621	-2.03606	-2.30426	-0.917674	-1.15463	-0.92571	-0.877882	-2.02847	-2.10352	0.200834	-1.16597	-1.58787	-1.83506	-1.98396	0.463986
LGALS9	0.0595545	0.256182	-0.225166	-0.0615645	-0.288957	0.00358312	-0.0786172	-0.0727708	-0.232942	0.144989	0.717158	0.320654	0.794253	0.12963	0.111781	0.227577	0.292837	1.06951	0.0785151
STXBP3	-5.1763	-5.11318	-5.1432	-5.18211	-5.15737	-5.44769	-4.62103	-5.16243	-4.73296	-3.77514	-3.43115	-4.08362	-4.86109	-4.11207	-4.97612	-5.11151	-2.90338	-3.67204	0.018847
MASP2	1.26149	1.02684	1.03015	1.49806	1.20291	1.45356	1.30343	1.11296	1.10976	1.2144	1.62239	1.01917	0.850175	0.920844	1.62146	1.70062	1.03716	1.13962	0.79678
SMAP	-5.69469	-5.16915	-5.6348	-6.89352	-5.57677	-6.90664	-0.810933	-5.64797	-5.96609	-5.59632	-6.76332	-1.87309	-6.17938	-5.50273	-6.66731	-6.27661	-7.61734	-5.31948	0.487705
RAB27B	-1.27766	-0.485914	-1.02169	-0.909405	-0.792084	-1.58896	-0.571412	-0.898193	-1.21817	-0.994683	-0.390551	-1.27508	-1.05391	-0.598832	-1.06129	-0.487087	-0.691137	-1.3863	0.979203
AP3B1	-0.925225	-1.09761	-0.789411	-1.02899	-1.11566	-1.285	-0.902133	-1.19683	-0.819878	-0.999386	-1.02944	-0.915042	-1.1088	-1.13074	-0.789455	-0.950069	-0.427161	-1.27176	0.799826
PSMD11	-0.695042	-0.874665	-1.46477	-1.3619	-1.12074	-1.41312	-0.665767	-0.682323	-1.23103	-0.654084	-0.724915	-1.13761	-1.09581	-1.81074	-1.39422	-1.29466	-1.38166	-0.90043	0.166906
PSMD12	-1.37928	-1.79318	0.486818	-0.645966	-1.25978	-2.0487	-0.930883	1.21226	-1.53569	-1.22691	-0.519282	-2.12688	-1.42185	-0.458571	-1.49902	-0.972596	-0.669308	0.0028712	0.772957
PSMD9	1.02191	1.23215	0.990066	1.12129	1.17294	0.974552	1.05416	1.23144	1.04169	0.566292	0.926531	1.22332	1.23189	1.18248	0.849931	1.14768	1.33494	1.47385	0.281975
SIRPB1	1.14778	1.39372	1.30863	1.42076	1.27572	1.50044	1.07527	1.55714	1.49485	1.32912	1.55059	0.833928	1.2823	1.32062	1.01259	1.14694	1.27991	1.50296	0.870149
ATOX1	0.887662	1.23898	0.498372	0.445257	0.718432	0.424686	0.658885	0.91927	0.956754	1.05566	0.552636	0.618606	0.884582	1.47455	0.888969	0.546441	0.377774	0.717581	0.157735
AGRP	-3.56246	-1.79196	-3.61007	-3.68097	-2.95043	-3.81569	-3.35271	-2.95518	-3.56132	-2.05881	-2.64336	-3.74926	-1.73084	-3.68252	-1.45513	-2.43073	-2.37795	-3.18035	0.521374
PGRMC1	-0.28501	0.974072	-0.846574	0.46554	-0.511048	0.483023	0.158946	0.54563	-1.62018	0.487554	0.192128	-0.472076	0.281052	0.618278	0.883226	-0.173762	0.002682	0.314886	0.744929
SUPT5H	-1.75462	-2.85809	-1.22725	-2.80262	-2.79025	-1.39842	-3.01816	-1.7909	-2.27036	-2.09796	-2.68852	-2.74333	-2.65862	-1.84636	-2.68657	-3.03363	-2.94729	-2.96637	0.474672
DFFA	-2.10176	-2.88678	-2.78434	-3.03459	-2.05312	-3.06942	-1.63036	-3.3274	-2.35734	-3.29078	-3.36736	-2.47098	-3.31367	-2.81765	-3.13513	-3.45133	-1.73576	-3.06351	0.777666
HIP1	-2.30546	-2.53389	-2.44257	-1.35563	-2.26177	-0.0701199	-2.02905	-1.74318	-2.37236	-1.6412	-2.23212	-2.41754	-1.34482	-2.63069	-2.38721	-2.23954	-0.931785	-1.94467	0.332187
LEFTY2	5.41419	5.04121	5.70296	5.80559	4.99727	5.14828	6.09692	5.8403	5.52367	5.22985	5.62378	5.92404	4.80098	4.91414	5.46972	5.08677	5.26371	5.02718	0.110807
CLIC1	2.78604	2.45634	2.49062	2.44452	2.54175	2.55668	2.63428	2.38254	2.58448	2.41974	2.59168	2.36249	2.52129	2.73751	2.56259	2.3045	2.22688	2.62425	0.491204
EIF3F	-2.02605	-1.41447	-2.31948	-1.65536	-0.627577	-1.06306	-1.50854	-1.59672	-1.98271	-1.82786	-1.52351	-1.06772	-1.94985	-1.94502	-0.730436	-2.01619	-1.70676	-0.755139	0.574721
UPK1A	-3.69005	-4.28813	-4.61387	-4.34951	-4.61645	-3.80645	-4.16226	-4.16529	-4.49724	-3.9818	-4.28664	-3.88166	-4.24931	-1.88569	-3.60116	-3.82838	-4.21317	-4.58629	0.3106
SLC28A1	-0.503979	-0.204425	-0.747847	-0.306308	-0.551201	-0.225412	-0.321984	-0.685244	-0.440202	-0.473417	-0.486743	-1.71628	-0.781552	-0.211112	-1.02453	-0.722151	-0.426914	-0.440559	0.608297
QSOX1	2.12473	2.25532	1.98258	2.12259	2.15265	2.0217	2.10854	2.17329	2.20095	2.00642	2.56495	2.13497	2.29719	2.06621	2.23545	2.20643	2.09996	2.58133	0.759502
DCTN6	0.00460901	-0.77065	-0.0192742	-0.481065	-0.194609	-0.238942	-0.327555	-0.565771	-0.0353815	-0.88577	-0.350269	0.118176	-0.575453	-0.929165	0.188563	-0.812941	-0.827056	0.0911415	0.978225
WASL	-1.61513	-0.161627	-1.70911	-1.74066	-1.7387	-0.935339	-0.697394	-1.84593	-1.77253	-1.86438	-1.62392	-1.06581	-1.88726	-1.12414	-1.96928	-1.20514	-2.00176	-1.68275	0.905021
IPO5	-1.50274	-3.02469	-2.67549	-2.14239	-2.08937	-1.80809	-2.17832	-3.30545	-2.55995	-3.03333	-1.55808	-3.01982	-2.33336	-2.80722	-2.50051	-1.98808	-2.83383	-2.74089	0.780264
DNM1L	-1.87369	-1.7719	-2.28286	-2.11067	-2.80303	-3.01421	-1.55627	-1.75952	-2.57624	-1.67669	-1.65242	-2.56919	-2.13008	-2.39974	-2.67955	-1.33053	-2.72798	-2.74436	0.507481
RTCA	-1.45482	-1.02763	-1.34563	-2.06659	-1.78705	-1.30203	-1.82231	-1.84949	-2.29617	-1.82174	-1.18763	-2.15437	-2.02266	-1.36854	-1.63853	-1.81985	-2.31097	-1.27663	0.401624
LST1	-1.37479	-0.421305	-0.648254	-0.86861	-1.18421	-1.13806	-0.582892	-0.728944	-0.983275	-0.918798	-0.710083	-1.16279	-1.30606	-1.26672	-0.928448	-0.845913	-0.643874	-1.13953	0.51825
GOLIM4	0.0567958	-1.01038	-1.56374	-0.00139492	-0.151567	-2.2354	-1.01077	-1.82426	0.300872	-1.246	-0.839235	-0.799271	-1.03173	-1.37525	-1.90221	-0.673608	-1.25244	-1.94944	0.88929
MANBA	0.231955	0.530255	0.228394	0.432355	0.248119	0.287003	0.418325	0.354485	0.132211	0.316872	0.509032	0.187401	0.204179	0.449966	0.372368	0.691841	0.450425	0.561171	0.261222
AGRN	1.69886	1.70736	1.46902	1.76082	1.45168	1.63086	1.82888	1.82522	1.61401	1.71013	1.69994	1.42566	1.90261	1.65527	1.69638	1.64078	1.83506	1.64999	0.600571
PSMD14	-1.02766	-0.366754	-0.656469	-0.965294	-0.993888	-0.717176	-0.517168	-0.833748	-0.572337	-0.784299	0.0678828	-0.61671	-0.702127	-0.270007	-0.121732	-0.798258	-0.153673	-1.18826	0.509189
BIN1	0.827733	0.404063	0.313213	-0.0987199	0.573124	0.614119	0.519426	0.396458	0.777775	0.469372	0.0694283	-0.0307139	0.462017	0.608203	0.712952	0.304905	0.776136	0.589758	0.377819
KPNA3	-2.41277	-1.44976	-2.35904	-1.94265	-2.20373	-2.95884	-1.77412	-2.51872	-1.80295	-3.00144	-1.09977	-1.68969	-2.03827	-1.45785	-1.89734	-1.54866	-1.53393	-3.05423	0.929863
USP9Y;USP9X	-4.04059	-3.98389	-4.15141	-4.22139	-4.17737	-4.27226	-3.40065	-4.40151	-3.9365	-4.14773	-3.77456	-4.25364	-4.05205	-4.23003	-4.14101	-3.33989	-3.68355	-4.14349	0.383003
LAD1	-2.05807	-2.16317	-1.81053	-2.58015	-1.53358	-2.56685	-1.00515	-2.196	-1.99617	-2.26309	-2.47955	-2.25047	-1.51866	-0.236096	-2.27019	-1.03597	-2.36262	-0.446896	0.343989
UPK2	-0.623894	-0.139475	-0.930448	-0.944909	-0.915239	-0.904094	-0.519544	-1.06483	-0.781114	-1.38941	0.281305	-0.69617	-0.876911	-0.613893	-0.118449	-0.501517	-0.353237	-0.400091	0.732712
CHL1	-0.0737738	-0.027633	-0.083672	-0.063252	-0.129443	-0.204352	-0.344932	-0.185709	-0.0296679	-0.268809	-0.082211	-0.403632	-0.495565	-0.311316	-0.416816	-0.284634	-0.0805354	-0.166541	0.0405717
VWA5A	-1.11317	-1.6245	-1.86199	-1.28278	-1.49868	-1.55958	-1.39647	-1.81796	-1.50716	-2.03921	-1.31009	-1.09766	-1.75585	-1.11519	-1.61958	-1.34779	-1.97931	-1.02817	0.997724
DLL1	-2.64408	-2.30257	-2.9708	-2.86615	-3.11368	-2.57573	-2.79445	-1.74232	-3.20169	-1.16338	-2.72775	-2.82999	-2.55414	-2.78729	-2.05689	-2.93531	-1.02623	-2.96641	0.901191
SDCBP	-0.400348	0.120245	-0.507904	-0.856763	-0.00403335	-0.223057	-0.68391	-0.750265	-0.423151	-0.128408	-0.206341	-0.408687	-0.304577	0.00448321	-0.58032	-0.031267	-0.81865	-0.205808	0.738225
DDX3X	-2.55374	-1.49957	-1.88718	-2.40853	-2.08087	-1.62312	-2.25697	-1.33333	-2.0113	-1.24572	-1.20184	-2.2193	-2.10173	-1.28745	-2.33619	-1.77162	-2.05479	-2.1631	0.831279
RNASET2	3.40051	3.58047	3.2506	3.4455	3.42717	3.44829	3.60405	3.53526	3.49726	3.32549	3.70087	3.40323	3.50898	3.88974	3.56097	3.66219	3.55596	3.80294	0.203051
PODXL	0.169166	0.359508	-0.04794	0.054116	0.244256	-0.390934	0.448764	0.401341	0.0131823	0.098013	-0.152834	0.357499	0.546911	0.328128	0.672319	0.351787	0.269517	-0.092657	0.199089
FCN1	-1.01922	-1.11609	-1.01232	-1.26623	-1.51884	-1.42359	-1.384	-1.39002	-1.15187	-1.0715	-1.05614	-1.21495	-1.46829	-0.998528	-1.49835	-1.21056	-1.69569	-0.92609	0.369054
CCN1	-3.03614	-2.1992	-2.86427	-3.35869	-2.80776	-2.59425	-2.19359	-3.0516	-1.95382	-3.23367	-2.34495	-1.8571	-3.40216	-2.2226	-3.35421	-2.77977	-3.21578	-1.00212	0.796342
PIR	-1.89707	-1.17997	-2.31756	-1.19704	-1.9338	-1.78337	-2.30154	-2.63708	-1.92669	-1.93444	-1.27859	-1.94167	-1.89039	-2.1815	-1.67588	-2.19003	-1.84757	-1.3259	0.485927
PPP6C	-0.783734	-0.698965	-1.00111	-1.12919	-0.813223	-1.14509	-0.880573	-1.05449	-1.22465	-0.817606	-0.789322	-1.34363	-0.920462	-0.647208	-1.38401	-0.72543	-0.735406	-1.67394	0.955565
MAN2B1	0.713387	0.781861	0.426469	0.625544	0.695693	0.495346	0.503277	0.751088	0.600004	0.730568	0.988489	0.551394	0.841516	0.80886	0.657802	0.8024	0.669683	0.825653	0.517964
FBP2	3.19854	3.36749	3.05558	3.14497	3.08335	3.07304	2.98827	3.22518	3.22668	2.93195	3.25603	3.16653	3.183	3.14324	2.9623	3.07997	3.26067	3.30992	0.770202
PDXK	-2.09142	-1.47857	-1.40228	-1.81939	-1.65778	-1.68304	-1.55177	-1.20416	-1.18886	-1.52559	-1.08898	-1.32802	-1.05084	-1.64059	-1.15965	-1.29195	-1.85924	-1.29443	0.273645
PLPP1	-2.39984	-2.34333	-2.33946	-2.26873	-2.37681	-2.42966	-2.37982	-2.52235	-2.42339	-2.37576	-1.85102	-2.41257	-2.46411	-2.08007	-2.31007	-2.29413	-2.45618	-2.38446	0.612017
ISLR	2.56843	2.6922	2.41554	2.4742	2.61502	2.40366	2.5501	2.29423	2.45852	2.51649	2.53299	2.31509	2.41686	2.75239	2.65343	2.58475	2.47426	2.73069	0.515008
HSPB6	-2.32287	-2.29801	-2.10207	-2.12485	-2.10993	-1.14045	-2.16263	-1.10442	-2.05323	-2.05289	-2.15529	-2.37009	-2.05689	-1.29883	-2.48034	-2.21431	-2.08525	-2.21096	0.604781
NDUFAB1	-1.70123	-1.87888	-1.96696	-1.70546	-1.87239	-1.74135	-1.65122	-1.00357	-1.49987	-1.75122	-1.73428	-1.77795	-1.6632	-1.53218	-1.78565	-1.80829	-1.78347	-1.75924	0.0478459
COPE	-1.5946	-1.87193	-0.964714	-1.65783	-2.11838	-1.96215	-2.00299	-1.36498	-1.3625	-1.07458	-1.09751	-0.815752	-0.694062	-1.84454	-1.45506	-3.54426	-1.45607	-1.61519	0.246887
NCAN	-2.94526	-2.93234	-3.00058	-2.98702	-2.92605	-2.94129	-3.04638	-2.81442	-2.94768	-2.99774	-3.00864	-2.95525	-2.97458	-2.99115	-2.94668	-3.00125	-2.9431	-3.01156	0.849236
AP3D1	-1.84135	-0.955838	-1.71215	-1.68055	-1.84551	-1.92069	-1.97583	-1.34187	-1.80455	-1.87666	-1.74017	-1.46717	-1.77488	-1.91905	-1.775	-1.46563	-0.950831	-1.36461	0.193054
CCS	1.38669	1.29623	1.587	1.15398	1.11368	1.31533	1.74217	1.60974	1.17381	1.22867	1.22862	1.79107	1.89595	1.64519	1.83165	1.38757	1.9624	1.09225	0.255756
CHD2	3.51347	3.27526	3.25655	3.41716	3.54848	3.37082	3.46739	3.33098	3.34227	3.3629	3.4775	3.38526	3.5612	3.76113	2.94443	3.57418	3.4294	3.46988	0.95672
ADAM10	-1.28027	-1.2733	-1.15028	-1.06769	-1.24903	-1.27384	-1.15236	-1.33851	-1.49439	-1.46414	-1.30251	-0.961186	-1.27311	-0.86208	-1.69339	-1.32122	-1.50311	-1.19169	0.964906
IMPA2	-2.18787	-1.06288	-1.47154	-2.08467	-1.41632	-1.95152	-1.12549	-0.633544	-1.07732	-0.693891	-1.5432	-1.81892	-1.8885	-0.322029	-1.68623	-0.813198	-0.726589	0.763339	0.112743
PDCD5	-0.241303	-1.27956	-0.414884	-0.259621	-0.404119	-0.619025	-0.809042	-0.444774	-0.240163	-1.26406	-0.13125	-0.683164	-0.597746	-1.10957	-0.66744	-1.2124	-0.708143	-0.0118536	0.922892
PRMT5	-1.25547	-1.15522	-2.23238	-2.38292	-2.48714	-2.15496	-1.39003	-2.38981	-1.64307	-1.66586	-0.853295	-2.28987	-1.89335	-1.53084	-1.39537	-1.63065	-2.25034	-2.23047	0.332678
NHERF1	0.867545	1.2374	1.06152	1.08205	1.14448	0.963835	1.03177	0.93996	1.17439	1.03806	1.16171	0.88617	1.10588	1.13219	1.28903	1.37725	1.17977	1.26469	0.195027
TPP1	0.689333	0.497761	0.408272	0.548736	0.643418	0.577135	0.809998	0.535064	0.604154	0.513181	0.941186	0.671572	0.795318	0.762008	0.871903	0.405523	0.516897	0.857917	0.365574
NRP1	-0.213782	-0.179417	-0.674991	-0.168054	-1.08619	-0.359023	-0.591614	-0.72173	-0.578221	-0.507407	0.0854475	-0.0699321	-0.164457	-0.0286222	-0.109184	-0.0957474	-0.199597	-0.0807472	0.124145
TNPO2	-4.05987	-2.26437	-3.82045	-3.79446	-2.19605	-4.79812	-2.53112	-2.96181	-1.9939	-2.32914	-2.85202	-3.89661	-3.97813	-1.78373	-2.87812	-2.26502	-2.60662	-2.69571	0.603146
APOL1	1.7889	2.11648	1.77791	1.99417	1.88761	1.90385	1.87034	2.07789	1.8471	1.92004	2.08364	1.75248	1.97162	1.96525	1.83824	1.98538	1.95394	2.01225	0.968009
TNFRSF10C	-2.72236	-3.04286	-2.85332	-2.8053	-2.65483	-2.86265	-3.53427	-3.07777	-3.02374	-2.67755	-2.5219	-1.30259	-3.00546	-1.98756	-3.08705	-2.28842	-3.23758	-2.43506	0.239329
PSMA7	1.49478	1.54268	1.44651	1.48252	1.71502	1.55867	1.39278	1.40588	1.45031	1.5576	1.81937	1.53751	1.47516	1.65713	1.33419	1.58262	1.34811	1.73917	0.430856
OPLAH	-4.49569	-4.35281	-4.69691	-4.11149	-4.48446	-4.63518	-4.77602	-4.81962	-4.57463	-3.29853	-4.92752	-4.74091	-4.47888	-4.55552	-4.60531	-4.33389	-4.83406	-4.8213	0.834872
MGST3	-2.13641	-2.34805	-2.26262	-2.31606	-2.29427	-2.30215	-2.09583	-2.18354	-2.24116	-2.15959	-1.78845	-2.2246	-2.16513	-2.31199	-2.26864	-2.06503	-2.25884	-1.44958	0.278693
IRF6	-3.8994	-4.28342	-5.07752	-4.24274	-4.5501	-4.03993	-3.21946	-4.2614	-5.04783	-3.42648	-5.13843	-4.94755	-4.53594	-3.57365	-4.84274	-4.88579	-5.03426	-4.546	0.871409
TAX1BP3	-1.16785	-1.21727	-0.858577	-1.04156	-1.30211	-0.923875	-0.781593	-1.36559	-0.790324	-0.810659	-1.08169	-0.926997	-1.39312	-1.21579	-0.453278	-1.08112	-1.06863	-0.768139	0.980067
UBE2L6	-3.34356	-2.43122	-3.25785	-3.30575	-3.48461	-2.92116	-2.38723	-3.55461	-3.62312	-2.16211	-2.41389	-3.32887	-2.97086	-3.11453	-3.40106	-3.43421	-3.2008	-1.12664	0.753611
MYL12B;MYL12A	-0.295455	0.373916	-0.0541304	0.290946	-0.039824	0.0542391	0.664484	-0.328121	0.00830982	1.00895	0.48508	-0.496951	-0.0224406	1.06981	-0.0419788	0.556118	-0.00208665	0.305997	0.938084
LECT2	-0.536852	-0.672358	-1.21192	-0.806702	-1.53622	-0.873326	-1.26824	-0.39316	-1.13276	-1.02136	-1.1012	-0.642662	-0.925059	-0.685362	-1.34472	-1.1857	-1.47331	-1.3515	0.540062
HGS	-1.34545	-1.39856	-1.86331	-1.35943	-1.75852	-1.23795	-1.58927	-1.5686	-1.69697	-1.78875	-1.0967	-2.21413	-0.698697	-1.56986	-1.99577	-1.29197	-2.08468	-1.0948	0.969201
RAB29	-3.10486	-2.23264	-2.52039	-2.43651	-2.36719	-2.36618	-2.52724	-3.0521	-1.01204	-2.50003	-1.17674	-2.5965	-2.27613	-2.96147	-2.97795	-2.79594	-3.02161	-2.22177	0.722168
PPP1R12A	-1.69477	-2.2877	-1.49958	-1.44192	-1.45112	-0.944296	-1.19305	-0.762972	-3.1633	-1.36253	-1.09709	-1.7404	-0.988076	-1.9352	-0.886306	-1.12076	-1.20035	-1.37463	0.777278
HNRNPDL	-1.0535	-0.121822	-1.08151	-0.124433	-0.559483	-0.552586	-0.329866	-0.456386	-0.74411	-0.538017	-0.433577	-0.623698	-0.468002	-0.133199	-0.887526	-0.498069	-0.0977165	-0.286763	0.639261
XPO1	-3.65113	-3.11651	-3.62088	-4.45777	-1.45241	-4.22669	-2.1585	-3.78531	-2.60701	-1.56981	-2.0807	-3.34467	-3.08718	-3.19622	-2.18614	-1.91346	-3.52013	-1.98115	0.643075
SEC16A	-0.416363	0.0137596	-0.290912	-0.327033	-0.420252	-0.420195	-0.397412	-0.281689	0.312051	-0.220535	-0.412847	-0.433952	-0.337989	-0.403949	-0.193717	-0.285246	0.0316791	-0.256124	0.568745
PLXNB2	-0.753721	-1.07489	-0.765719	-1.4315	-0.680174	-1.17012	-1.70297	-1.55883	-1.15956	-1.17216	-1.42093	-0.925958	-1.41683	-0.902433	-2.2457	-0.932783	-1.22476	-1.39454	0.326706
PFAS	-0.298766	-0.226404	0.134161	-0.426098	-0.252275	-0.195312	-0.180537	-0.405509	-0.358719	-0.0816712	0.351622	-0.230724	-0.207987	-0.185127	-0.251556	-0.1124	-0.22717	-0.0502175	0.27435
SMAD7	-3.99653	-4.59013	-5.59834	-3.11737	-3.41233	-4.19704	-4.40449	-3.80129	-3.73419	-4.2542	-3.25261	-4.45963	-3.42827	-4.98381	-4.03446	-4.84773	-5.05113	-3.7801	0.355375
LSM1	-1.68156	-1.40906	-2.35859	-1.82991	-2.1915	-2.43852	-2.62378	-2.49747	-1.97023	-1.09926	-1.37545	-2.00484	-2.2603	-1.79867	-1.604	-1.68265	-2.61577	-1.57698	0.279851
FYB1	-2.79896	-2.39787	-1.94112	-2.05216	-2.73648	-2.14266	-2.68705	-2.54881	-2.11258	-2.07821	-2.19366	-2.80914	-2.03612	-2.82131	-2.43104	-3.01545	-2.47582	-2.02261	0.992397
NPC1	-1.08398	-1.02736	-1.32496	-1.74014	-1.23229	-1.69599	-1.39538	-1.94722	-1.07089	-1.6968	-0.968867	-1.14114	-2.03032	-1.29836	-1.55319	-1.81836	-1.68695	-0.839686	0.648053
ARPC1B	-0.08853	0.437969	-0.104654	-0.0278333	0.0173844	-0.0188649	-0.214787	-0.0870604	-0.337274	0.00654091	0.598671	0.054803	-0.0430014	0.0248787	-0.0819831	0.273472	0.0674325	0.133955	0.178238
ARPC2	0.956892	1.27977	1.20476	1.00692	1.2298	1.2068	1.21182	1.10241	1.28318	1.41431	1.37848	1.16684	0.938249	1.23618	0.856146	1.01876	0.779446	0.982676	0.0694788
ARPC3	1.7	1.70544	1.68599	1.56612	1.49226	1.43494	1.54408	1.44706	1.68439	1.54813	1.63093	1.38092	1.34116	1.51342	1.24107	1.31386	1.25144	1.628	0.0732481
PLSCR1	-1.3978	-2.28835	-2.16461	-3.42825	-2.94242	-3.4854	-2.40537	-2.94206	-1.94593	-2.87233	-1.56124	-1.77636	-0.969488	-2.95586	-1.20945	-3.21093	-2.44016	-2.69407	0.0835725
PGRMC2	-1.79502	-1.25368	-0.673292	-2.29509	-1.44072	-1.57386	-1.00053	-1.2754	-1.74073	0.781235	-0.346495	-1.87038	-2.12222	-2.42078	-0.604692	-1.45998	-1.54289	-1.84382	0.361868
EPHB6	0.135043	0.557239	0.653443	0.776667	0.530291	0.493832	0.452395	0.731647	0.610714	0.320165	0.744992	0.323164	0.623981	0.555798	0.512074	0.720324	0.960341	0.3712	0.744416
SMAD9;SMAD3;SMAD2	-3.79843	-3.34211	-3.40273	-3.05148	-2.90708	-3.60985	-3.27948	-3.4587	-1.84776	-3.41055	-2.06206	-3.56979	-3.32172	-3.02553	-2.23916	-1.6883	-3.69224	-3.5304	0.873625
ADAMDEC1	-2.6371	-1.71825	-3.00026	-1.66179	-2.70465	-1.30634	-3.30072	-1.34185	-3.63946	-2.82629	-1.87731	-2.32865	-2.60883	-1.89369	-0.890022	-2.12569	-2.8583	-1.69637	0.696136
PFDN6	0.177837	-0.181989	0.0799494	-0.0962106	-0.341841	-0.026712	0.384717	0.172068	0.108419	-1.46607	0.0632057	-0.302396	-0.164414	-0.603824	-0.33588	-0.626749	-0.0879761	0.312496	0.286182
LAMA5	-0.627309	-0.711945	-0.610743	-0.500425	-0.72637	-0.854364	-0.59491	-0.696761	-0.973329	-0.663527	-0.602199	-0.265923	-0.471365	-0.838093	-0.718871	-0.570339	-0.410675	-0.395155	0.278256
ZNF185	-2.00378	-1.91954	-1.83416	-1.56398	-2.93318	-2.24717	-2.34925	-2.19657	-2.31736	-1.83813	-2.14816	-2.64101	-1.77172	-2.57794	-2.09442	-2.18395	-2.38938	-2.11521	0.85126
VGF	-0.131099	0.661451	0.103796	0.331967	0.017113	0.353076	0.313877	0.634495	-1.26982	0.171719	0.27558	-0.079107	0.108781	0.148929	0.701368	2.29003e-05	-0.0621236	0.444834	0.924345
SURF4	-1.02399	-1.06873	-1.02854	-1.07606	-0.981367	-0.864363	-1.03853	-1.06158	-1.03729	-1.03133	-1.04906	-1.01484	-1.02614	-0.982948	-1.05163	-1.02994	-1.04138	-1.02383	0.514611
ALOX15B	-1.70197	-1.26244	-1.24407	-1.42039	-1.30952	-1.10032	-0.935494	-1.17592	-0.890455	-1.33805	-1.34161	0.191669	-1.38757	-1.63371	-1.29907	-1.43068	-1.49151	-1.33239	0.346076
PMM2	-1.60687	-0.839802	-1.93179	-1.53203	-1.88675	-1.37493	-1.48028	-1.32909	-1.77783	-1.26121	-1.8232	-1.12894	-1.55906	-1.48705	-1.13366	-1.94128	-1.71257	-1.05909	0.972133
INPP4B	-4.61413	-4.63515	-4.74906	-4.8902	-5.11119	-5.236	-4.18319	-4.84052	-5.01081	-4.83944	-4.72757	-4.45896	-2.69551	-5.14105	-4.70043	-4.97901	-4.6937	-5.4472	0.508535
HMGB3	-0.359971	0.316206	0.00320139	-0.48145	0.0719519	-0.117069	0.390174	0.674691	-0.300754	0.286272	-0.181362	0.0785647	-0.0730548	1.20179	1.03816	0.204152	0.76647	0.447049	0.172054
EIF3D	-1.12656	-0.994352	-1.19219	-0.691119	-1.13387	-1.13157	-1.1037	-1.05421	-0.935496	-0.310163	-1.10322	-0.974226	-1.13295	-1.0778	-1.11709	-1.12237	0.208098	-0.496624	0.247833
BCAT2	-0.436798	0.0124493	-0.778506	-0.452828	-0.326094	-0.677465	-0.13218	-0.530885	-0.547497	-0.518341	-0.214064	-0.57052	-0.527068	0.0438194	-0.609688	-0.608795	-0.458684	0.053734	0.991939
SIGLEC5	-2.18731	-1.72993	-1.98559	-1.62015	-1.77566	-0.939764	-2.51542	-1.18239	-1.59395	-1.49904	-1.37911	-2.43326	-1.38984	-2.64849	-1.14592	-1.45265	-0.889862	-1.42258	0.657378
TMPRSS2	-2.76419	-2.83776	-1.64755	-1.26943	-0.134317	-1.73267	-1.67962	-1.3907	-2.29791	-2.12397	-1.73563	-1.2772	-0.687429	-1.47335	-0.586188	-1.27539	-0.901121	-1.43873	0.0476781
NCAM2	3.24141	2.85467	3.17689	3.15615	3.69698	3.1444	3.11466	2.9047	3.45306	3.21535	3.27209	3.21476	3.20896	3.45533	3.30138	3.2803	3.13656	3.20441	0.6635
STX7	-0.888615	-0.636589	-1.14505	-0.794024	-0.982925	-0.376588	-0.969212	-0.767849	-0.666611	-0.887457	-0.502877	-0.819493	-0.488277	-0.643259	-0.654894	-0.3592	-0.176412	0.0133629	0.0180086
SLC16A3	-2.79457	-2.85373	-2.7646	-2.81599	-2.86582	-2.84947	-2.49766	-2.78925	-2.95058	-2.89171	-2.82225	-2.87611	-2.75657	-2.83857	-2.78959	-2.80396	-2.84359	-2.88367	0.730932
SLC31A1	-2.39064	-2.32114	-2.40099	-2.25786	-2.20244	-2.28859	-2.29111	-2.28905	-2.36778	-2.20086	-2.27479	-2.29818	-1.8061	-2.26055	-2.16349	-2.12352	-2.23746	-2.14542	0.0630968
CAPN5	-0.975086	-1.18591	-2.17599	-0.976172	-1.31357	-1.18152	-1.66552	-1.59243	-1.37695	-1.60534	-1.14858	-1.41497	-0.908422	-0.930684	-1.48539	-1.43749	-1.5026	-0.861163	0.633122
YKT6	-0.231474	-0.585046	-0.348335	-0.990932	-0.49738	-1.01515	-0.869735	-1.09059	-1.02997	-1.0883	-0.236392	-0.69043	-0.913894	-0.704675	-1.06144	-0.655757	-0.743268	-0.67201	0.101776
ARPC5	1.5228	1.34737	1.49372	1.36148	1.12783	1.66099	1.14187	1.35722	1.17629	1.51968	1.52803	1.55638	1.71533	1.81003	1.86091	1.72082	1.86945	1.73869	0.00120401
MAFG	-2.26824	-2.25549	-3.19742	-3.23676	-2.872	-2.88252	-2.03844	-3.14612	-2.92649	-3.02026	-3.05895	-3.20922	-3.42335	-2.01662	-2.98152	-2.98415	-3.57559	-3.34943	0.453892
FABP7	-2.41556	0.233491	-2.70946	-2.91982	-2.74382	-2.87342	-2.66819	-0.720165	-2.16281	-0.790873	-2.34585	-3.00017	-0.462609	-2.61329	-1.43437	0.0663918	-2.12346	-0.100328	0.38535
CLDN3	-2.00505	-2.33266	-0.957642	-2.46585	-2.19858	-2.05593	-1.96579	-1.35646	-2.02107	-2.12821	-2.05309	-2.09131	-1.7377	-2.39206	-1.45837	-0.236872	-2.07304	-1.83829	0.555955
DHX15	-3.77218	-3.84128	-3.8814	-2.23729	-3.63829	-3.83699	-4.32287	-3.54921	-4.08699	-4.39509	-3.10575	-2.23564	-3.90692	-3.65631	-2.01519	-4.07377	-3.80764	-3.81592	0.569469
FLRT2	-2.63794	-1.59919	-1.42554	-2.50445	-1.59848	-2.57748	-1.44183	-1.75845	-1.09263	-1.82289	-1.82067	-1.43825	-1.69425	-2.29755	-1.50768	-1.61596	-1.88183	-1.8382	0.396063
PLXNB1	-2.74398	-2.91776	-2.24736	-2.20158	-1.91672	-2.54155	-2.79926	-1.99612	-2.77554	-2.74929	-1.07415	-1.23615	-1.69394	-2.53496	-2.51275	-2.46799	-2.83856	-1.96769	0.369309
CYB5B	-2.338	-2.5273	-2.59649	-2.52933	-2.69515	-1.86632	-1.8982	-1.87926	-2.69499	-2.56872	-2.75418	-2.70943	-2.96672	-2.68494	-2.86276	-2.7779	-2.89578	-2.78307	0.0641676
PHGDH	-1.73869	-0.928273	-1.31269	-1.39445	-1.10694	-1.16206	-1.11121	-0.759926	-1.43457	-0.784332	-0.99791	-1.35982	-1.21034	-1.12475	-1.58055	-1.02414	-0.930155	-1.45664	0.813311
NDUFS4	-2.34729	-2.85206	-2.74208	-2.98769	-2.82203	-2.85725	-2.85666	-2.87784	-2.97908	-2.16012	-2.33522	-3.09119	-3.0193	-2.07434	-2.66719	-3.0775	-2.91612	-2.81469	0.443091
IRAK2	2.96015	3.72	3.9471	3.80941	3.53716	3.74254	3.07194	3.94659	3.35115	3.63053	3.80226	3.00916	3.29188	3.2757	3.48149	3.66135	3.44636	4.04656	0.782526
DYNC1LI2	-1.74621	-0.796244	-1.4379	-1.35278	-1.25599	-0.933658	-2.07053	-1.7359	1.4751	0.0141569	-0.776873	-1.95249	-0.799276	-0.997835	-1.00152	-1.35145	-1.07173	-1.00763	0.976783
KLK10	-1.89952	-1.86332	-1.68679	-1.86532	-2.27776	-1.9886	-1.92992	-1.86297	-2.03964	-0.887486	-2.19971	-1.82017	-2.14569	-2.20554	-1.86016	-1.76514	-1.94797	-1.67348	0.532861
PSMD3	-1.48617	-1.45982	-0.267884	-0.94133	-1.71463	-2.51071	-2.0572	-2.44695	-1.77304	-1.8716	-1.51088	-2.41642	-1.39401	-1.6323	-1.73572	-1.71158	-2.60538	-1.5189	0.307558
SPINT1	1.1425	1.47844	1.07081	1.12981	1.16028	1.19647	1.22783	1.09407	1.26843	1.35953	1.37142	1.0445	1.29706	1.35561	1.14529	1.43921	1.16375	1.53877	0.618361
TREH	-0.845779	-2.6266	-2.99265	-2.58986	-2.95738	-2.70244	-0.686777	-2.81735	-2.53158	-3.01787	-3.05429	-3.04933	-1.96107	0.0522768	-1.62395	-3.65815	-2.23759	-3.36518	0.121694
SPINT2	0.386802	0.563182	-0.176559	0.0437447	0.293883	0.760231	0.594787	0.294632	-0.0581996	-0.0236769	0.136762	0.0451968	0.722131	0.561435	0.558432	-0.285982	0.329755	0.992722	0.610067
EEF1E1	1.49024	1.41408	1.7179	1.56599	0.623984	1.16117	1.6629	1.00478	0.604546	1.63465	1.41362	0.924385	1.42979	2.0915	0.835021	1.42367	1.86557	1.0955	0.747623
MSI1	-3.40587	-3.95603	-4.14488	-4.26333	-3.12848	-2.65367	-3.09302	-4.52059	-3.89881	-2.33742	-2.29595	-3.04321	-1.61782	-3.0455	-4.00716	-1.14158	-3.76605	-3.1587	0.371315
HNRNPR	0.654512	0.599998	0.366696	0.655644	0.719926	0.559401	0.700979	0.518778	0.590449	0.393192	0.785633	0.41715	0.478514	0.550089	0.48111	0.737035	0.304817	0.846934	0.868441
TXNL1	0.405047	0.752343	0.109048	0.490508	0.451455	0.649007	0.530547	0.528427	0.741607	0.706762	0.825934	0.54079	0.654257	0.570776	0.681382	0.439753	0.538045	0.868167	0.579794
TPD52L2	1.23866	1.14383	1.04178	1.05502	0.8422	1.0697	1.13266	1.02075	0.932258	0.941624	1.12874	1.17681	1.07593	1.18269	1.29532	1.1394	1.21237	0.81569	0.526315
COCH	1.26809	0.895628	0.916315	0.862287	1.18164	0.94649	1.16937	0.784053	1.14165	0.828559	0.741447	1.0134	0.761554	0.795616	0.928187	0.805895	0.568068	0.739553	0.156135
PPIH	1.17653	0.381232	1.09033	0.286306	1.18803	0.275876	1.10676	0.616801	1.02008	1.02941	-0.0564687	1.02764	1.18435	0.842325	0.507298	0.914187	0.311951	0.417969	0.836557
MGAM	3.44221	3.36996	3.06259	3.12689	3.23553	3.09982	3.40588	3.135	3.30585	3.24644	3.59938	3.17551	3.33413	3.40424	3.33094	3.29331	3.18249	3.47681	0.650145
AKR7A2	0.021275	-0.187057	-0.182199	-0.181433	-0.183636	-0.223257	0.00643938	-0.0120179	0.0387366	-0.602509	0.0931659	-0.0915547	-0.526394	-0.21034	-0.266779	-0.818273	-0.396297	-0.148727	0.217987
PROM1	-0.943034	-0.560008	-1.00246	-0.87913	-0.689697	-0.638021	-0.942779	-1.21129	-0.724984	-0.665348	-0.529443	-0.910608	-0.77002	-0.627581	-0.947229	-0.520826	-0.705065	-0.651344	0.376407
EPB41L2	-1.15806	-0.650335	-1.23728	-1.16269	-1.75233	-1.28201	-0.861201	-1.11895	-2.11408	-1.76004	-0.765056	-1.67153	-0.640378	-1.66611	-0.897948	-1.24133	-0.867185	-0.575755	0.650519
TGOLN2	-1.90011	-1.66418	-2.11137	-1.7814	-1.8926	-2.10383	-2.2004	-1.8473	-2.3034	-2.05949	-1.70588	-1.97913	-1.26684	-2.21714	-2.02204	-2.48747	-2.08689	-1.66592	0.851907
CACNA1G	-1.11943	-2.09163	-1.72846	-2.04295	-1.59572	-1.5808	-0.46428	-0.894482	-1.35313	-2.01089	-1.89964	-1.15486	-2.52466	-0.545689	0.545942	-1.48779	-2.34383	-2.14938	0.355035
LAMTOR5	-0.614977	0.102187	-1.01903	-0.477786	-0.450912	0.484689	0.5809	-1.04605	0.262842	-0.0188633	-0.281537	-0.485585	-0.0448284	0.14745	-0.271501	0.134819	-0.301172	-0.253468	0.877396
B4GAT1	0.358482	0.423652	-0.0403437	0.395098	0.314703	-0.218626	0.31777	0.117484	0.254279	0.380762	0.512738	0.188102	-0.00874268	0.450633	0.268673	0.269755	0.172875	0.660771	0.872578
SLC26A4	-2.91828	-3.19753	-2.98748	-3.30692	-3.22041	-3.26622	-3.23987	-3.41717	-3.00075	-2.18855	-3.12169	-3.11412	-3.42199	-3.09349	-3.23557	-3.1951	-3.04901	-3.07782	0.28765
WIPF1	-0.774496	-0.60785	-1.06299	-1.20611	-0.971546	-1.07949	-0.964323	-1.14972	-1.0995	-1.35443	-0.813015	-1.27429	-1.03745	-0.584175	-0.937609	-0.987239	-0.554408	-0.726391	0.175851
RGS14	-2.20582	-1.68803	-1.51632	-1.23722	-0.844612	-1.33657	-2.17196	-1.6787	-1.47035	-1.06264	-1.50522	-1.71888	-1.8715	0.00864636	-2.75044	-1.24191	-0.995476	-1.62154	0.772465
RNF13	-1.11898	-0.923933	-1.29988	-1.07138	-1.03612	-1.29807	-1.02173	-1.04327	-0.871812	-0.209082	-0.73528	-0.64166	-0.294612	-0.454479	-0.516748	-1.38767	-0.256726	-1.05559	0.0408242
CA12	-2.05164	-2.99384	-2.86542	-2.02038	-1.65424	-2.64348	-2.86639	-2.32693	-2.27295	-2.51365	-1.65284	-1.90274	-3.26787	-1.07533	-2.33948	-1.76306	-1.53254	-1.11636	0.288141
DENR	-0.734171	-0.343532	-0.588349	-0.60843	-1.0076	-0.209103	-0.995724	-0.465998	-0.981291	-0.741761	-0.831473	-0.994076	-0.95561	-0.785332	-0.249278	-0.646422	-0.624772	-0.865899	0.747141
PSTPIP1	-1.94926	-1.68608	-1.59778	-1.18322	-0.977926	-1.02003	-1.01845	-0.0852163	-1.61469	-1.72642	-0.933392	-0.219914	-0.554119	-2.20494	-0.183138	-1.25182	-0.322536	-1.88158	0.711919
DNPH1	0.5707	0.87209	0.250282	0.14115	0.409077	0.765803	0.749943	-0.0460499	0.515446	-0.152391	0.698771	0.386667	0.762456	0.592958	0.591822	0.936091	0.709591	0.70426	0.48676
SPRY1	-1.8102	0.482037	-2.99204	-2.40282	-1.45205	-2.7737	-2.36989	-0.637134	-1.16641	-0.135885	-0.929802	-2.40217	-0.0963027	0.0481308	-2.07393	-2.51642	-2.01162	-0.838973	0.692977
TRAPPC3	-1.25967	-0.371836	-1.19685	-1.04542	-1.34866	-1.24344	-1.06449	-1.14511	-0.765362	-0.869759	-0.679697	-1.34567	-0.69974	-1.00689	-1.74305	-1.06964	-0.998447	-0.778941	0.885889
CHMP2A	-0.363929	0.444335	0.356597	-0.234487	0.732741	0.0862619	0.123619	0.21617	-0.145258	0.0898451	0.654263	0.598167	0.293332	-0.369707	0.576445	-0.607255	0.120005	0.160495	0.702757
PSCA	1.00804	1.12926	0.111855	0.669631	0.559436	0.63127	0.672041	0.849274	0.784748	0.783349	1.53598	1.11854	0.993495	0.861501	1.15777	1.18919	0.944222	1.64062	0.176108
TSPAN6	-1.63658	-0.207454	-1.57482	-1.75823	-1.77643	-0.563996	-1.21938	-1.41487	-1.67202	-1.57607	-1.77048	-0.52071	-1.64404	-1.85255	-0.17513	-1.31591	-1.87915	-1.73341	0.946555
RGS10	-2.87379	-2.6747	-3.77706	-3.10174	-3.40283	-2.77805	-2.52714	-1.83497	-3.95435	-2.80358	-2.47265	-3.43368	-3.19809	-3.69993	-3.12934	-4.09258	-2.67403	-2.20005	0.93856
ZNF207	-0.563332	-0.465433	-1.25198	-0.257205	-1.41751	-0.696928	-1.77171	-0.362013	-0.564668	-0.319295	-0.778652	-1.329	-1.14303	-1.51251	-0.749289	-1.36251	-1.78042	-0.649345	0.823133
GET3	0.107396	0.154201	-0.183511	-0.31201	-0.307537	-0.245236	0.112964	0.277049	0.0372604	-0.0304834	0.413966	0.129041	-0.0709714	-0.725423	-0.393968	-0.422206	-0.472466	-0.134197	0.0111303
BUB1	-1.66046	-2.52129	-1.62793	-3.06352	-2.34344	-3.10543	-0.896637	-3.24114	-1.32698	-3.26008	-1.99482	-2.71494	-2.86384	-2.67797	-2.9224	-2.64731	-2.85299	-1.75024	0.333709
BUB3	-1.42074	-1.55836	-2.49901	-1.73026	-2.00431	-1.83568	-0.661143	0.00698248	-2.99912	-1.18209	-0.870814	-2.57915	-1.50132	-2.30738	-1.37978	-0.789655	-1.61656	-1.26308	0.861955
PI15	0.848615	1.73869	1.31665	1.43201	1.08723	1.23949	1.23173	1.71349	0.804013	1.08967	0.613316	1.2773	1.46307	1.45141	1.52916	0.743995	1.89027	0.218633	0.730268
ACTN4	1.61155	1.77592	1.52008	1.44107	1.59644	1.52661	1.65271	1.41633	1.58541	1.61899	1.75558	1.46637	1.46841	1.75563	1.55224	1.50707	1.51444	1.63302	0.841537
GSTZ1	-2.02855	-1.56507	-2.42379	-2.09412	-2.3896	-2.35269	-2.28723	-2.47665	-2.50516	-2.3613	-1.95813	-2.46473	-2.29351	-1.89716	-2.5394	-1.16536	-2.25451	-2.56326	0.741567
AP1G1	-2.31523	-0.963166	-0.887522	-0.682317	-1.9955	-2.09288	-2.08239	-1.76716	-1.50141	-0.734621	-2.15881	-2.15874	-0.747964	-0.784101	-2.03169	-1.75216	-0.897441	-0.85138	0.819298
SGTA	-0.760672	-1.2344	-0.835824	-1.05342	-1.09522	-1.35466	-1.0511	-0.742954	-0.636085	-1.03224	-0.964574	-2.16034	-0.680996	-1.14504	-1.03118	-0.692175	-0.745922	-0.786419	0.238686
ENSA	-0.926694	-0.444234	-1.55532	-1.48209	-0.979373	-0.91099	-1.01341	-0.494207	-1.1233	-0.863925	-0.844453	-1.157	-1.05012	-0.97951	-1.25742	-1.53395	-0.987742	-0.52557	0.963233
NARS1	-0.129908	0.0704827	-0.437508	-0.147796	-0.276306	-0.232558	0.120778	-0.0564779	0.024196	-0.257939	0.074622	-0.323793	-0.28805	0.0616584	-0.433702	-0.269541	-0.627874	0.132844	0.728488
KRT86	-0.126913	0.150833	-0.311174	-0.185272	0.267281	-0.361372	-0.311699	-0.153326	-0.252382	-0.699561	-0.670191	-3.4229	-0.609595	-2.49185	-2.81294	0.0554514	-2.1142	-0.308861	0.122213
NUDT21	-0.642058	-0.916939	-1.18186	-0.916963	-1.35835	-0.765065	-1.17336	-1.51733	-1.32339	-0.688834	-0.971365	-0.972114	-0.928109	-0.960078	-1.06963	-0.857384	-0.89138	-1.42011	0.269611
LANCL1	-0.269431	-0.338012	-0.746529	-0.477746	-0.523008	-0.313853	-0.15271	-0.424917	-0.679391	-0.453027	-0.16411	-0.710074	-0.519624	-0.359629	-0.305032	-0.403293	-0.458737	-0.877478	0.932011
AKAP8	-5.12164	-4.06917	-4.80518	-4.57502	-4.11037	-3.59585	-4.55249	-4.09692	-4.96654	-3.16803	-3.98501	-4.95984	-2.58698	-3.44176	-4.82568	-2.61711	-2.50473	-3.22642	0.0620884
NRDC	-2.2932	-2.55504	-2.58366	-2.39294	-2.43858	-2.48968	-2.44375	-2.54445	-2.52367	-2.47996	-2.49736	-2.51388	-2.46401	-2.15175	-2.53712	-2.42946	-2.56792	-2.53601	0.739278
CALU	-0.0777489	-0.21179	-0.281443	0.0561636	-0.311274	-0.0799115	-0.239805	-0.0471687	-0.419962	-0.44274	0.0165636	0.174834	-0.0792952	-0.6182	-0.241654	-0.00814048	-0.153053	-0.389458	0.825875
AHCYL1;AHCYL2	-3.0924	-2.72633	-2.53859	-2.36764	-3.73866	-3.59207	-1.80244	-3.64955	-3.51141	-3.08718	-3.08105	-3.68964	-3.3599	-3.37698	-2.17523	-3.695	-2.59751	-2.76013	0.941716
CD5L	3.27181	3.65466	2.99896	3.08095	3.29572	3.31927	3.66862	3.11649	3.60472	3.18157	3.37843	3.5965	3.29764	3.84121	3.7492	3.22453	3.33984	3.79453	0.577645
XPNPEP2	-1.4137	-1.18682	-1.39455	-1.28608	-1.113	-1.342	-1.31405	-1.6116	-1.12191	-1.53254	-1.19634	-1.491	-1.32685	-1.06883	-1.20772	-1.25018	-1.12992	-0.948576	0.324364
TLL1	2.82501	2.76126	3.406	3.10924	3.04093	2.91402	3.19715	3.16707	3.27114	2.69207	2.4362	1.63502	2.38655	2.69257	2.81998	2.70211	2.21245	2.9409	0.0345885
PDE6D	-1.4866	0.0232237	-1.89284	-2.17972	-0.409905	-2.45154	-1.99767	-1.48923	-1.62996	-1.72199	-1.71253	-1.79852	-1.81187	-1.54916	-1.52025	-1.40315	-1.44086	-0.0613691	0.635199
RAD21	-1.00694	-1.80176	-1.63473	-1.45261	-1.46727	-0.237074	-0.313865	-0.473903	-1.55094	-1.59139	-1.76574	-1.57865	-1.17076	-1.72416	-1.5128	-1.5045	-1.68499	-2.00367	0.167101
AKR1B10	-2.4961	0.294227	-2.24818	-1.11496	0.0877962	-1.66991	-3.0197	-2.68798	-1.98526	-1.30238	-1.8185	-2.87234	-1.80507	-2.41932	-3.38761	-2.70265	-1.2475	-1.5908	0.300472
GMFG	1.52551	1.79584	1.53433	1.75216	1.61452	1.52281	1.71394	1.76877	1.61919	1.44643	2.10363	1.46774	1.84925	1.70945	1.83464	1.6665	1.82887	1.96068	0.692326
PLIN1	-3.4929	-0.731442	-2.06109	-1.07956	-1.59029	-1.53424	-0.438291	-1.57466	-2.60401	-1.66878	-2.14603	-1.6709	-1.13831	-1.52955	0.525412	-3.0371	-1.66309	-1.7652	0.444291
ADGRB2	-2.08729	-2.03664	-2.07508	-2.04898	-2.07867	-2.06836	-2.05162	-2.04311	-2.05498	-2.05431	-2.01689	-1.85566	-2.09051	-2.09406	-2.07771	-2.07747	-2.06687	-1.99342	0.172584
PRPSAP2	-1.72635	-1.54152	-1.36335	-1.54481	-1.49621	-1.34869	-1.2866	-1.81126	-1.84264	-1.29283	-1.3871	-1.80826	-1.68071	-1.57074	-1.87562	-1.78701	-2.06657	-1.6545	0.335131
SMARCA5	-3.15361	-3.77348	-2.35311	-2.32339	-2.41983	-1.73813	-2.82033	-3.50703	-3.08506	-3.68775	-2.81715	-3.72808	-3.65167	-2.27966	-3.62758	-3.00256	-2.91194	-1.97821	0.164616
SPAG9	-2.38047	-1.55332	-2.44685	-1.85133	-3.03385	-2.20025	-1.94355	-3.14743	-1.58979	-2.28262	-2.07455	-2.4268	-2.47917	-2.87246	-2.51637	-2.75406	-2.76751	-2.20349	0.78207
SUSD5	-1.45881	-0.641004	-0.676306	-0.789746	-0.940393	-0.849531	-0.763288	-0.51927	-0.776665	-1.6345	-0.927308	-0.586225	-0.530519	-1.06884	-0.741896	-0.67457	-0.439525	-0.612892	0.544186
KIF5C	-2.44629	0.00665463	1.69812	-3.213	-2.937	1.61391	-2.47723	-2.53748	-2.74939	1.13637	0.900436	-3.06436	-2.79904	-3.39527	-1.85861	-0.0454511	-2.77092	-2.2617	0.459849
URB1	3.03414	3.6291	3.15805	3.24736	3.37092	3.05865	3.10523	2.95755	3.41127	3.29634	3.16854	2.95678	3.24222	2.86434	2.71791	3.52819	3.42719	3.39765	0.189545
FZD6	-0.916027	-0.764694	-0.971758	-0.781217	-0.935738	-1.00931	-0.813145	-0.955193	-0.663274	-0.497527	-0.408897	-1.09527	-1.02733	-0.564138	-0.981748	-0.258528	-0.717689	-0.771187	0.491335
PPL	2.28523	2.3752	2.34453	2.33378	2.3578	2.44719	2.33134	2.04874	2.30357	3.13249	2.69454	2.29914	1.82786	2.29773	2.57064	2.17711	2.39033	2.52587	0.265052
NRP2	-2.65318	-2.28797	-2.40355	-2.24752	-2.34167	-1.76527	-2.36101	-0.393218	-2.42455	-2.04855	-2.2962	-2.3756	-1.91879	-1.62237	-2.22091	-2.34924	-2.38795	-0.977082	0.734821
ACSL4	-1.99594	-1.59851	-1.36304	-0.738062	-1.98837	0.100344	-1.03049	-2.20822	-1.42954	-1.20939	-1.36824	-0.890883	-0.928259	-1.23978	-1.03139	-0.678824	-0.906822	-2.09118	0.627309
SNX3	-1.01665	-0.716688	-1.12633	-1.12623	-1.04205	-1.09506	-0.847355	-1.37701	-1.40203	-0.986701	-0.95168	-1.3214	-1.25641	-1.28074	-1.3419	-1.61748	-1.40882	-0.755986	0.593399
CUBN	2.10918	2.12888	1.94972	2.02871	2.17078	2.12252	2.11443	1.99916	2.11518	2.07512	2.32056	1.99742	2.07519	2.2928	2.10995	2.24584	1.96297	2.22919	0.897112
SYNCRIP	-1.03508	-1.58875	-1.48905	-1.27584	-0.898172	-1.0963	-1.05097	-1.24619	-0.970081	-1.32488	-1.01419	-0.946237	-1.53392	-1.42255	-1.18498	-1.18796	-1.75982	-0.986766	0.448756
TPST1	-3.75656	-3.93351	-3.82681	-4.07648	-3.92834	-3.80238	-3.39358	-3.63504	-4.36417	-4.22609	-4.23993	-3.91382	-3.86917	-3.91772	-2.46143	-3.84836	-4.03582	-3.80495	0.469533
GMDS	-1.65943	-1.61799	-1.51896	-1.40715	-1.56012	-1.89036	-1.50123	-1.49839	-1.27613	-1.82541	-2.06997	-1.67313	-2.05639	-2.39674	-2.6474	-1.91594	-1.87082	-1.56544	0.00179353
TLR2	-1.18555	-1.93467	-1.12423	-1.57151	-1.73737	-1.77336	-1.75801	-0.861367	-1.79145	-1.57232	-0.753925	-1.59432	-2.21855	-1.11007	-1.88975	-0.953215	-1.14546	0.88306	0.177435
DIAPH1	-1.4521	-1.78185	-1.63549	-1.72423	-1.58814	-1.75445	-1.5233	-1.74502	-1.48394	-1.61698	-1.4173	-2.23593	-0.920942	-1.87439	-1.9303	-1.64767	-1.62259	-1.97614	0.958649
SELENOF	-3.22866	-3.12355	-3.45515	-2.47984	-2.72328	-3.09722	-3.1122	-3.09234	-3.14919	-3.27333	-3.53487	-3.20467	-3.11501	-3.27265	-2.95834	-1.76072	-3.02611	-2.9702	0.115548
TSPAN1	2.6895	3.18668	2.20363	2.1725	2.43358	2.38772	2.52081	2.0779	2.60162	2.65832	2.70223	2.26283	3.00436	2.74037	2.36364	2.91744	2.99347	2.73436	0.267272
TSPAN3	-4.7503	-4.32079	-4.67368	-4.75843	-4.52369	-4.51611	-4.66132	-3.93586	-4.61307	-4.61416	-3.81653	-4.42865	-4.63035	-4.66372	-4.58171	-4.70659	-4.47782	-4.48391	0.599037
EXOC3	-5.2063	-2.23035	-2.62791	-5.07314	-4.64425	-5.28682	-4.73694	-4.83181	-5.53835	-4.87277	-4.36816	-5.21601	-4.3888	-4.45474	-5.32354	-4.76589	-5.32823	-5.07771	0.116438
PDE8A	-0.706251	-1.3615	-1.52224	-1.45327	-0.738604	-1.02215	-0.253149	-0.77953	-1.39658	-1.32379	-0.955442	-1.39333	-0.746001	-1.37315	-1.44495	-1.57192	-1.50929	-1.00835	0.651883
PLIN3	-0.0384287	0.655154	0.00671094	0.10602	0.198563	0.197082	0.225563	0.131495	0.178633	0.225851	-0.0024071	0.194897	0.267843	0.222028	0.286196	0.267093	0.221354	0.0079419	0.970788
FCMR	-2.04255	-1.70951	-2.8016	-2.4875	-2.49061	-2.03511	-2.32418	-2.13049	-4.12433	-2.4723	-1.93077	-2.33635	-2.99462	-2.25101	-2.95295	-2.62943	-3.05161	-2.6962	0.532214
KPNA6	-1.47908	-1.45894	-1.52916	-1.47424	-1.49211	-1.57611	-1.64261	-1.62947	-1.63924	-1.60075	-0.690505	-1.34126	-1.55457	-1.40484	-1.45105	-1.56623	-1.57258	-1.05064	0.392655
UGDH	-0.693192	-0.856691	-1.24736	-1.58635	-0.865771	-1.11521	-0.732391	-0.867168	-1.29498	-0.715462	-0.967105	-0.949575	-0.97263	-1.19916	-0.817039	-0.576689	-1.28219	-0.885424	0.800922
CTNND1	-1.33291	-0.679893	-1.76576	-0.806963	-1.78185	-1.25692	-1.83088	-1.4904	-1.70009	-1.10711	-1.75274	-1.69558	-1.22023	-1.29366	-1.20569	-1.47851	-1.13533	-0.773801	0.507414
EIF1B	-5.20346	-4.96677	-4.61381	-4.80905	-4.17362	-4.8638	-5.09455	-4.24599	-4.72541	-4.80745	-2.83523	-5.13813	-5.03139	-4.66745	-5.47526	-5.13146	-4.95323	-4.78219	0.622682
SNX2	-1.05971	-0.990499	-1.3297	-1.47584	-1.28333	-0.967719	-0.846248	-1.07379	-1.08063	-0.895754	-0.630037	-1.63298	-1.19355	-1.24102	-1.2258	-1.03013	-1.26614	-1.10115	0.845822
USO1	-2.58742	-1.8477	-1.49906	-2.99298	-1.31833	-1.90797	-1.56285	-2.56882	-2.55957	-2.4885	-2.50267	-1.18294	-2.63909	-0.203231	-0.391241	-2.56494	-1.4543	-2.27712	0.586521
TOM1	-1.20284	-2.32889	-1.8398	-1.33877	-1.36264	-1.40472	-1.68249	-3.3787	-1.9074	-1.53165	-0.877665	-1.77824	-1.78889	-1.43212	-1.50276	-1.6282	-2.82502	-0.709726	0.529585
H2BC12;H2BC12L;H2BC5;H2BC4;H2BC18;H2BC9;H2BC15;H2BC14;H2BC13	5.038	4.88895	4.80162	5.315	4.38775	5.38327	5.44026	5.10768	4.91465	5.14822	5.45372	5.37915	5.22551	5.40644	5.17217	4.94888	5.11778	5.17431	0.478174
EDF1	-1.77057	-1.23306	-1.69864	-0.782834	-1.24649	-1.57406	-1.95147	-1.17469	-0.853567	-1.94928	-1.48378	-1.86208	-1.07143	-2.26137	-1.61935	-1.86223	-1.10903	-1.27539	0.628627
DNAJA2	-1.00047	-1.34276	-1.20006	-1.39097	-0.512784	-1.31341	-0.49216	-1.27298	-1.42157	-0.43527	-0.428901	-1.13723	-1.46402	0.890263	-1.48165	-1.26652	-1.69253	-0.767666	0.837115
CUTA	1.77706	1.24972	1.09942	1.26759	2.03423	1.94614	1.57682	0.260146	0.523187	1.62036	2.36929	0.90276	1.1705	2.28181	1.61242	1.7889	0.772248	2.02735	0.414689
CTSV	-3.95238	-1.89515	-2.26766	-3.40779	-3.0606	-2.7747	-3.0041	-3.19696	-2.7027	0.361238	-2.80539	-2.65379	-3.50583	-2.55259	-3.15446	-1.87525	-3.44124	-3.16063	0.512906
PFDN1	-0.624928	-0.540597	-0.840599	-0.903935	-0.629335	-0.22456	-0.748836	-0.512949	-0.379573	-0.321387	-0.497277	-1.53799	-0.534577	-0.750614	-0.811379	-0.56129	-0.491124	-0.210785	0.809017
SCN2B	-2.309	-2.25621	-2.3271	-2.22863	-2.25887	-2.31963	-2.19616	-2.19872	-2.29727	-2.42486	-2.31204	-2.2544	-2.36512	-2.271	-2.32593	-1.66094	-2.09494	-2.42504	0.404802
FCGR3B	-0.0263599	-0.0220325	0.0133526	-0.0540748	-0.0826325	0.286577	-0.125657	-0.288459	0.390735	-0.261604	0.742697	0.312025	0.447636	-0.0852415	1.28393	0.419377	-0.430021	0.353727	0.601442
LILRB5	-1.41959	-1.62317	-0.842145	-1.76585	-1.58435	-1.6952	-1.75041	-1.6688	-1.31068	-1.39224	-1.13551	-1.59617	-1.43632	-1.22672	-1.305	-1.30937	-1.78835	-1.68084	0.310537
MITF	-2.22284	-2.25968	-2.25198	-2.35838	-2.25176	-0.962099	-1.85162	-1.1087	-2.19399	-2.10288	-1.89083	-2.54619	-1.97324	-2.34429	-2.09	-2.29374	-2.27118	-2.38034	0.492957
DENND4B	-2.04367	-3.37458	-3.43413	-1.37465	-3.14626	-3.0159	-2.85533	-3.36238	-1.53932	-1.15308	-1.27477	-1.73923	-2.83274	-3.01453	-3.016	-2.83513	-3.45707	-2.74903	0.0911361
EFCAB14	0.422117	0.894584	0.549523	0.252927	0.70021	0.438572	0.69702	0.392841	0.42829	0.554453	0.335944	0.498701	0.172937	0.789925	0.158702	0.451064	0.333847	0.560789	0.830991
LRP3	-3.12004	-3.42412	-3.373	-2.82077	-2.32544	-2.41682	-2.50275	-2.59704	-3.14917	-3.07421	-2.20347	-3.28516	-2.70749	-1.66322	-2.27466	-1.93069	-2.42955	-1.85685	0.0232536
WDR1	0.834367	0.923886	0.843592	0.624988	0.712741	0.728614	0.929445	0.612172	0.805033	0.799777	1.23377	0.735738	0.419828	0.554012	0.738197	1.09344	0.409319	0.955445	0.397643
FZD7;FZD2	0.637976	1.24166	0.663676	0.735306	0.875425	0.678662	1.01712	1.05749	0.878373	0.78919	1.06194	0.494661	0.508084	1.15357	0.978862	1.005	0.558486	1.28888	0.900071
SLIT1	-1.50678	-1.48496	-1.30825	-1.35831	-1.25472	-1.46352	-1.33892	-1.38247	-1.40531	-1.25717	-1.3474	-0.961191	-1.48557	-1.37151	-1.2432	-1.36423	-1.39257	-1.35434	0.246179
SLIT3	-1.97834	-1.44035	-1.62499	-1.53369	-1.29886	-1.55582	-1.902	-1.15146	-1.1404	-1.43902	-1.75255	-1.67592	-1.70016	-2.23574	-2.45988	-1.90866	-2.11278	-1.28535	0.169231
MEGF6	-4.98964	-4.66357	-5.33462	-5.1799	-4.67243	-4.03864	-5.3768	-4.62875	-5.54998	-4.4225	-5.75517	-4.94162	-5.38278	-5.01773	-2.15516	-3.83767	-4.55181	-5.46612	0.772327
CPNE3	1.15262	0.943701	1.20145	1.14103	1.28466	1.39581	1.28911	1.44518	1.0183	0.705882	1.41669	0.990717	1.08218	0.816103	1.18763	1.30932	1.08743	1.06815	0.602788
ICOSLG	-1.24931	-0.997882	-0.482456	-0.55213	-0.716247	0.162753	-0.309934	-1.36993	-0.484875	-0.504333	-0.465103	0.105708	-0.723987	0.601483	0.147359	-0.434441	-0.989254	-0.611411	0.254249
HIP1R	-1.53528	-1.52881	-1.54254	-1.54277	-1.53327	-1.48688	-1.54119	-1.54271	-1.55026	-1.52277	-1.54014	-1.53022	-1.53255	-1.52334	-1.53176	-1.54034	-1.53519	-1.53322	0.430197
CLUH	-1.6655	-3.41216	-3.04992	-2.98857	-3.83804	-1.70144	-3.06058	-3.22795	-1.23844	-2.54588	-3.03643	-3.41286	-3.49198	-3.2467	-3.00644	-3.08462	-3.19332	-0.982621	0.87718
DNAJC13	-0.929553	-2.88951	-2.89016	-2.12953	-2.97517	-2.81335	-2.00137	-1.76435	-2.47753	-2.68435	0.292527	-1.49687	-2.51893	-3.10829	-2.57738	-1.4405	-2.13853	-1.88858	0.343116
DNAJB6	-2.99647	-3.07517	-3.12895	-2.95506	-3.04243	-2.9377	-3.10662	-2.37025	-2.96541	-2.88813	-3.23264	-3.12779	-3.00596	-2.98853	-3.05375	-2.79089	-3.00016	-2.8543	0.461607
COQ9	-5.46465	-4.74641	-4.9633	-5.72818	-5.68297	-5.52417	-3.8219	-5.77691	-5.51185	-5.60337	-4.91041	-5.4928	-5.50612	-5.32564	-5.44609	-5.68295	-5.79319	-5.53164	0.486528
GGCT	0.432025	0.521601	0.721086	0.594999	0.605264	1.07018	0.405202	0.551388	0.586056	2.97106	0.906414	0.484111	0.445347	0.739569	0.72438	1.35265	0.776334	0.337769	0.461979
SMIM24	-2.25222	-1.56256	-2.13805	-1.42228	-1.112	-1.30025	-2.36167	-2.19314	-1.5839	-2.29349	-1.6834	-1.74722	-1.75479	-0.991466	-1.24873	-2.30414	-2.34334	-1.06365	0.170039
CDH16	-0.931459	-0.771678	-0.879349	-0.922142	-1.0338	-1.03244	-0.988474	-0.799837	-1.17442	-0.979011	-0.53287	-0.967636	-0.860654	-0.937662	-0.702215	-0.737304	-0.959409	-0.729432	0.513959
UGT2B11	-5.5966	-5.17624	-4.94743	-5.14588	-5.30413	-5.27947	-5.16649	-5.20517	-5.13388	-5.13115	-3.54192	-5.19169	-5.29304	-3.94042	-5.55328	-5.3819	-5.31003	-4.12305	0.790248
ZPR1	-1.71503	-1.91172	-2.59199	-2.94221	-3.04183	-1.89273	-2.00764	-2.7056	-1.97072	-2.6394	-2.65938	-1.70804	-2.89447	-2.26903	-2.55686	-2.63549	-2.87812	-2.11694	0.66446
SEMA7A	-1.94961	-1.25546	-2.48219	-3.62163	-1.61251	-1.43228	-1.9351	-1.40703	-1.59461	-0.889286	-2.76715	-2.94752	-2.42421	-2.23498	-2.6453	-2.64777	-2.8928	-2.97816	0.487829
CILP	-0.0679264	-0.219524	-0.110937	-0.40188	-0.129042	-0.527148	0.0554633	0.638582	-0.0792119	-0.46099	-0.196395	-0.403862	0.0477412	-0.152272	-0.665242	-0.561659	-0.380881	-0.63422	0.0490239
PDCD6	0.189961	0.44296	-0.0381888	0.121172	0.428074	0.167574	0.0808732	-0.120196	0.164289	0.233235	0.214717	-0.521014	-0.232543	0.445205	-0.18312	0.355699	-0.0732171	0.304782	0.788491
TBCA	0.68106	0.960799	0.821576	0.760404	0.81694	0.975151	0.678459	0.983727	0.90603	0.883265	0.935085	0.606938	0.94917	1.00114	-0.0211731	0.619869	0.90032	1.01241	0.928683
ATP6V1G1	0.0797867	0.622545	-0.120151	0.139367	0.00246043	-0.114141	-0.289083	0.277274	-0.0136379	0.0751126	0.624339	0.144353	-0.0479534	0.207865	0.320855	-0.34074	0.296991	0.159967	0.76435
VPS4B	-0.598302	-0.605493	-0.612235	-0.967737	-0.495019	-0.910008	-0.52582	-0.86574	-0.60658	-0.765188	-0.743966	-0.949734	-0.693424	-0.681982	-0.75742	-0.50232	-0.684125	-0.473761	0.248867
MPDU1	-3.97011	-4.12404	-4.24357	-3.92864	-3.87327	-3.85311	-4.06745	-3.9968	-4.38508	-3.90257	-3.13617	-4.26948	-4.3448	-4.11878	-3.98054	-3.36776	-4.06991	-3.96205	0.455374
ENTPD6	-4.49552	-4.5651	-4.94928	-4.28694	-3.39354	-3.04777	-3.21279	-3.40548	-3.39105	-4.16985	-4.99585	-4.12064	0.692898	-3.90717	-4.79631	-2.78266	-3.8954	-3.73246	0.454379
ENTPD5	1.8553	-1.67996	-1.04413	1.77904	-0.0509354	1.46041	-1.74385	-2.25076	-2.08078	-2.97101	-2.19182	-2.15303	-2.53068	-1.66328	-1.91406	1.83169	-1.95514	-1.61054	0.0349258
BCAS1	-0.509436	-0.384515	-0.828633	-0.980773	-0.805265	-0.746671	-1.04938	-0.324987	-0.694089	-0.739252	-0.59689	-0.914445	-0.544046	-0.671091	-0.746934	-0.402444	-0.566255	-0.0550984	0.190234
MACROH2A1	-1.11676	-1.16577	-1.19494	-1.43312	-1.62297	-1.33839	-0.840598	-1.74392	-1.64535	-1.307	-0.879868	-1.04022	-1.27452	-1.30275	-1.53248	-1.06486	-1.25154	-1.1238	0.295382
SH3BGRL	1.76994	1.73633	1.692	1.75699	1.70119	1.66387	1.79304	1.62228	1.86535	1.88709	1.76834	1.48801	1.59731	1.67077	1.63143	1.60175	1.49088	1.79748	0.707372
FLNB	1.75822	1.83346	1.73393	1.79544	1.65398	1.76966	1.78316	1.6503	1.86457	2.03177	1.8499	1.62114	1.67038	1.85513	1.72736	1.90637	1.86133	1.90533	0.541761
CS	-0.901002	-0.722492	-0.61539	-0.863378	-0.563251	-0.580799	-0.518135	-1.01149	-0.883254	-0.432315	-0.141733	-1.12788	-0.768263	-0.679931	-1.05145	-0.371065	-0.547989	-0.613759	0.624807
SPAG7	-1.62333	-1.82558	-1.68976	-2.56327	-1.24475	-1.42781	-2.14574	-2.21418	-1.33205	-2.79013	-1.98737	-2.29804	-2.29285	-2.33035	-2.20392	-1.79589	-1.79602	-1.96144	0.273569
MRPL33	0.519727	-2.78975	-2.641	-2.61351	-2.0091	-2.44844	-2.61142	-3.09059	-2.23778	-0.277578	-3.06396	-2.24843	-2.37089	-2.62596	-3.1382	-0.645134	-2.06549	-2.50109	0.713228
SEC22B	-1.01774	-2.5803	-1.41819	-0.923416	-1.54576	-0.928789	-0.560714	-1.01287	-1.10176	-0.595069	-1.2465	-1.67152	-0.961468	-1.22593	-1.21698	-0.830275	-0.555988	-1.64312	0.537833
LRCH4	-2.80332	-3.34829	-3.08467	-3.43945	-3.54803	-3.3891	-3.5493	-3.48808	-3.57671	-2.94789	-3.42109	-3.45849	-3.50457	-3.47045	-2.45689	-3.5018	-3.65894	-3.52145	0.273828
MTX2	-2.79435	-2.3922	-2.76122	-2.74632	-2.8509	-2.93508	-2.95568	-2.85386	-2.87066	-2.74036	-2.81298	-2.62755	-2.73116	-2.90775	-2.70755	-1.9655	-2.93508	-2.91115	0.715583
VPS26A	-0.613998	-0.719848	-0.859481	-0.923014	-0.404075	-1.23443	-0.230101	-0.741842	-0.428898	-0.507145	-0.32169	-0.368483	-0.943776	-0.45224	-0.75216	-0.252631	-0.978127	-0.660316	0.385754
TECTA	2.08939	2.26319	2.25531	1.87868	1.77744	1.92354	2.3855	2.56142	1.96523	1.75286	2.14704	1.88104	1.8672	2.01086	2.50864	1.72457	1.67182	2.17738	0.162953
USH2A	-0.695382	-0.764438	-0.510114	-0.640804	-1.08324	-0.777362	-0.657237	0.952774	0.144115	-1.09788	2.089	-1.19768	-1.55982	-1.16089	-0.566915	-1.33663	-0.130769	-1.366	0.504187
CRLF1	-2.17796	-2.26969	-0.535442	-2.27486	-2.26597	-2.27584	-2.52117	-2.64574	-2.33088	-3.01129	-2.41209	-2.71679	-2.28505	-2.6793	-2.10359	-0.818893	-2.40221	-2.76746	0.395398
GPC4	-2.74755	-1.67806	-2.628	-1.05204	-1.9442	-1.80394	-1.57027	-2.57451	-1.93036	-2.74429	-2.10287	-2.53981	-1.60627	-1.44966	-1.31451	-2.16063	-2.64458	-2.40765	0.0409861
CLN5	2.00892	2.0804	1.92185	1.96041	2.02768	1.91249	2.01387	1.99571	2.06503	1.85528	2.0962	1.87494	1.90209	2.14601	1.89712	1.88727	1.76556	2.04488	0.751111
HSBP1	-5.13983	-5.18565	-5.09017	-5.17165	-5.05312	-5.4064	-4.86445	-5.01368	-4.19705	-5.08871	-4.83484	-5.29331	-5.06778	-4.91308	-5.28605	-5.07662	-5.29007	-5.09549	0.16323
ECI2	-0.782019	-1.17903	0.2704	-2.0071	-1.45889	-0.891757	-1.44751	-0.891281	-2.43339	-1.50714	-1.63759	1.18183	-1.27704	-0.779063	1.45941	-1.6964	-1.6543	-1.49634	0.408482
BANF1	1.96903	1.98059	1.38565	1.73694	1.61473	1.5038	1.96491	1.72623	1.63702	1.51177	1.72767	1.69692	1.26569	1.36905	1.16683	1.43092	1.26816	1.78332	0.075031
SF3B1	-0.656497	-0.945291	-1.32229	-0.84695	-0.989373	-0.746355	-1.34222	-1.1514	-0.81099	-0.95765	-0.92535	-1.15501	-0.253678	-1.12457	-0.5846	-0.824579	-0.684378	-0.670048	0.325811
CSDE1	-2.02458	-1.8691	-3.62351	-3.21845	-3.59108	-1.89212	-2.9907	-3.03092	-3.73693	-2.94848	-1.55726	-3.8701	-2.99594	-3.04466	-3.61416	-1.27741	-3.59686	-3.15405	0.888564
SKAP2	-0.377925	-0.0260304	-0.159808	-0.488213	-0.439729	-0.262878	-0.264231	-0.226088	-0.395701	-0.559227	-0.417272	-0.487036	-0.60829	-0.293331	-0.496218	-0.279688	-0.559591	-0.295093	0.139931
MYCBP2	-1.36503	-1.81334	-1.70636	-1.65187	-1.63482	-1.64437	-0.864597	-1.85257	-2.15466	-0.77508	-1.46358	-2.32667	-0.60928	-2.36832	0.49682	-2.13461	-1.80092	-1.30842	0.697655
PGLYRP1	3.91135	4.29252	4.07206	4.0401	4.20487	4.106	4.05039	4.23752	3.93594	3.88626	4.49201	4.31409	4.57182	4.21813	4.48544	4.03901	4.36825	4.55336	0.308047
LYPLA1	1.14101	1.26137	0.940807	1.04224	1.09837	0.971506	1.08145	1.11752	0.957733	1.57048	1.4713	1.07883	1.26165	0.987535	0.990177	1.05573	1.04131	1.44464	0.245191
CREG1	-0.132388	-0.852019	-0.523773	-0.94984	-0.580185	-0.707513	-0.526378	-0.625848	-1.07442	-0.775962	-0.00794893	-1.11051	-0.238749	-0.642629	-0.442948	-0.320035	-0.723998	-0.49442	0.79352
UPK3A	-0.295046	-0.590098	-0.205815	-0.686943	-0.523428	-0.749887	-0.126261	-0.646673	-0.391161	-0.861061	0.135866	-0.809412	-0.347497	-2.004	-0.582792	0.394161	-0.265936	0.101903	0.226273
FCN3	2.21779	2.17069	1.74178	1.7264	2.08026	2.08707	2.15461	2.28988	1.94676	2.09869	2.24757	2.52733	2.59336	1.90912	2.5181	2.15059	2.5067	2.10859	0.430112
SNRNP200	-3.04937	-2.08398	-2.89289	-2.81887	-3.10482	-3.04782	-3.04873	-2.93733	-2.89603	-2.45062	-3.09321	-2.15893	-2.69056	-3.02995	-2.80625	-2.87116	-3.11136	-1.95057	0.701049
TIPRL	-1.78112	-0.0582973	-0.536624	-1.99225	-0.856755	-1.23801	-1.16746	-0.953365	-1.38072	-0.689535	-0.75056	-2.42459	-0.817832	0.130519	-1.80974	-0.902129	-0.945479	-1.03551	0.881419
PPM1B	-1.81776	-1.52027	-1.89435	-1.93347	-2.14999	-2.10977	-1.35963	-1.88848	-2.04032	-2.16768	-1.898	-1.83054	-1.38142	-1.06475	-1.89124	-2.17767	-2.27948	-1.76273	0.113078
RP2	-1.01736	-0.824279	-1.06294	-1.02786	-0.834396	-1.35848	-0.727323	-0.832978	-1.31463	-1.10661	-0.480717	-0.936988	-0.620418	-1.11745	-0.794178	-0.655547	-0.932666	-0.23145	0.472671
B3GALNT1	-1.9138	-2.46413	-2.79501	-2.04716	-2.63265	-2.94382	-2.62834	-2.64612	-2.07454	-0.199226	-2.06317	-2.75475	-2.58422	-2.50026	-2.62198	-3.1803	-2.7799	-2.16602	0.47742
ATP6AP2	-2.16914	-0.61499	-1.31903	-1.43807	-2.07136	-2.36903	-1.76749	-1.09141	-2.69062	-1.68411	-2.16503	-1.65361	-1.26827	-1.44445	-0.94353	-1.88537	-1.64556	-2.47787	0.419496
EIF3G	-0.0489819	-0.32054	-0.562342	-0.432955	-0.115886	-0.317143	-0.271007	-0.520638	-0.324281	-0.50994	-0.0369042	-0.402039	-0.676528	-0.403572	-0.954527	-0.328494	-0.431442	0.0509771	0.273942
EIF3J	-1.88947	-0.717586	-2.13544	-1.77247	-0.727	-1.8995	-1.0949	-1.00375	-1.96654	-1.02082	-1.42566	-1.37504	-2.01933	-1.75288	-1.60007	-1.17427	-1.90309	-1.82684	0.821397
PSMD10	-2.05758	-2.47782	-3.83105	-2.91196	-2.06952	-3.49487	-2.59789	-2.70919	-2.88485	-2.98749	-3.20231	-4.12941	-3.7004	-3.20365	-2.65006	-2.87148	-3.65437	-3.16318	0.63978
IDH1	2.93853	3.09589	2.91265	2.93312	2.93681	2.85475	3.01401	2.77081	2.90334	2.91969	3.26305	2.86202	2.80574	3.11157	3.01071	2.94877	2.83622	3.15397	0.893254
ATRN	2.42582	2.67179	2.57585	2.4821	2.54019	2.56176	2.3892	2.56646	2.65064	2.53106	2.81939	2.55438	2.66623	2.60967	2.57624	2.77392	2.65141	2.88888	0.158041
RBBP9	-1.65152	-1.34496	-2.30613	-2.42185	-2.02104	-2.49878	-2.48219	-2.28689	-2.18078	-1.02774	-1.16872	-1.69456	-1.31554	-2.32032	-2.58602	-1.22949	-2.26553	-2.27732	0.133754
STAM2	-1.29901	-1.57667	-1.90736	-1.62387	-1.03599	-1.6097	-1.53947	-1.76	-1.20362	-1.82572	-0.960685	-0.997876	-1.61907	-1.57012	-1.66496	-0.296052	-1.56766	-0.70323	0.24656
ALDH1L1	-0.602382	-0.458914	-0.403993	-0.747361	-0.550504	-0.585799	-0.302698	-0.620752	-0.506678	-0.554331	-0.285578	-0.717613	-0.842942	-0.358886	-0.673137	-0.566644	-0.51722	-0.500351	0.765359
CCNK	-4.19456	-4.31268	-4.36523	-4.21676	-4.32325	-3.71146	-2.93535	-4.45071	-3.39187	-4.16066	-4.25653	-4.54154	-4.13423	-4.35271	-4.38582	-4.41412	-3.71569	-4.20117	0.260492
ARL6IP5	-1.12888	-1.23973	-1.47961	-1.59789	-1.35895	-1.21326	-0.557084	-1.57973	-0.603463	-1.59473	-0.512649	-1.50127	-1.6284	-1.20578	-1.59529	-0.749205	-1.34651	-1.49203	0.631652
DYSF	-1.17775	-2.20595	-1.7563	-1.96403	-1.38135	-1.46053	-1.91764	-1.81938	-1.94539	-1.35024	-1.3243	-1.62248	-1.88324	-0.803294	-1.74321	-1.24528	-2.19158	-1.52048	0.758922
DCTN3	-0.64177	-0.682024	-0.250416	-0.251558	-0.110797	-0.454463	0.116403	-1.36927	-0.188458	-0.319954	-0.964952	-0.0808017	-0.289504	-0.226144	-0.667725	0.097434	0.202703	-0.822607	0.929642
BBOX1	-1.77441	-1.6571	-1.76975	-1.67955	-1.68047	-1.64024	-1.6724	-1.79131	-1.71567	-1.7984	-1.33876	-1.71224	-1.68959	-1.81198	-1.69682	-1.59922	-1.5893	-1.71137	0.664769
DNAJC8	-2.37604	-1.83783	-2.38555	-2.35044	-1.83819	-2.43208	-2.40953	-2.07223	-2.35219	-2.43478	-2.39639	-2.32431	-2.28843	-2.4229	-2.33901	-2.37734	-2.37483	-2.23498	0.822882
SMNDC1	-2.83017	-2.59535	-3.38998	-2.85741	-3.29607	-3.58559	-2.77177	-2.58288	-3.73896	-3.78545	-2.76147	-3.70211	-2.12437	-3.55751	-2.27585	-3.24334	-3.66682	-3.77446	0.378309
ATP5PD	-1.28582	-1.49576	-1.19948	-1.36144	-1.37583	-1.33029	-0.780648	-1.3671	-1.33749	-1.16339	-1.25324	-1.33858	-1.19231	-1.28904	-1.23337	-1.14753	-1.37052	-1.19343	0.729212
TSPAN9	-3.56478	-2.33446	-3.32919	-3.4679	-3.29911	-2.56592	-3.33129	-3.48441	-3.63508	-3.37698	-3.07351	-3.30426	-2.79419	-3.45899	-3.40341	-3.3797	-3.48589	-3.43191	0.71031
FLOT1	-0.0220772	0.104148	-0.081959	-0.0308389	-0.113945	-0.543725	-0.163477	-0.387753	0.0757166	0.0259168	0.313106	-0.0258517	-0.534065	0.166356	-0.286291	0.233329	0.112363	-0.28729	0.486311
ATP5MG	-1.74727	-1.54601	-0.401727	-1.12803	-1.76258	-1.65708	-1.95484	-2.0232	-1.75529	-1.44688	-1.82153	-1.92788	-1.58698	-2.05514	-2.24539	-1.33088	-1.72799	0.251666	0.257703
CPD	-2.5427	-2.55589	-2.82222	-1.50486	-1.99204	-1.75522	-2.10911	-1.77599	-2.03179	-1.64442	-3.27188	-2.91368	-1.73782	-1.33253	-2.25504	-1.3619	-1.48577	-2.43661	0.106928
SASH3	-0.828183	-0.503286	-0.528448	-0.665392	-0.573646	-0.758084	-1.35351	-1.00857	-1.24788	-0.867842	-0.654352	-1.40324	-0.514105	-0.572777	-0.803089	-0.401661	-0.868424	-0.414622	0.0288162
GLRX3	-0.757724	-0.989756	-0.55676	-1.11722	-0.80666	-1.10328	-1.09842	-1.16883	-0.84628	-0.968724	-0.85072	-1.25194	-0.805713	-1.62993	-0.718138	-0.916139	-0.876678	-0.804691	0.707268
CLPX	4.02374	3.67871	3.91413	4.03611	3.89534	3.89119	3.96996	3.97202	4.15761	3.49632	3.38515	3.49953	3.18167	3.50057	2.58836	3.59188	3.16037	3.19035	0.00147959
SEC14L2	-3.46324	-4.35945	-4.10877	-3.68382	-3.64009	-3.91509	-3.9844	-4.05373	-3.74126	-3.90981	-1.53073	-3.52206	-4.17026	-3.3495	-3.15009	-3.56364	-3.73728	-3.92218	0.431756
SNCG	3.49015	3.37652	3.39962	3.35214	3.21169	3.33123	3.5299	3.36009	3.53837	3.37283	3.51094	3.44006	3.62271	3.50279	3.66162	3.29168	3.56899	3.55091	0.0544706
CIAO1	-3.85075	-3.74578	-3.87406	-3.69139	-3.72666	-3.79411	-3.95878	-3.78414	-3.10967	-2.90317	-3.8497	-4.02098	-3.82209	-3.74335	-3.70318	-3.83	-3.53827	-3.68291	0.940241
CCN5	-0.146218	0.0231416	-0.331869	0.00107871	-0.256646	-0.0466634	0.0973962	0.329041	-0.0970863	-0.261073	0.136979	-0.051679	0.011212	-0.270477	0.401372	-0.0959135	0.0673522	0.238287	0.628177
SRP72	-1.33179	-3.61001	-2.47291	-3.38985	-3.48092	-2.85092	-2.87534	-2.67045	-2.8083	-3.15194	-3.21246	-3.23207	-3.30512	-1.30072	-3.24409	-2.95814	-3.58403	-3.30523	0.574601
DDAH1	2.05948	2.07922	1.79022	1.47903	1.7595	1.77587	1.55308	1.76091	1.86465	1.35615	1.82964	2.15084	1.69618	1.76422	1.79838	1.62258	1.57233	1.59339	0.355564
LY6H	-1.89948	-1.38102	-1.57771	-1.49547	-1.37228	-1.41769	-1.51656	-1.35205	-1.35035	-1.31554	-1.46511	-1.58571	-0.889391	-0.976151	-1.17828	-1.43866	-0.946791	-1.39209	0.0245152
STK10	-0.877158	-0.787487	-1.26969	-0.21688	-0.358192	-0.672855	-0.99081	0.0434836	-1.23808	-1.42816	-1.34377	-1.06646	-1.45265	-0.684535	-1.04238	-1.48139	-1.6326	-0.0292811	0.425271
SLIT2	-1.01087	-2.20363	-1.14754	-2.27349	-1.62468	-1.92406	-2.4352	-1.2236	-1.40645	-2.56692	-3.0332	-2.05949	-2.27329	-2.61825	-1.97484	-2.49609	-1.66143	-1.56948	0.18177
TOMM70	-1.67876	-1.67252	-1.67849	-1.68574	-1.68088	-1.69123	-1.69085	-1.69113	-1.69915	-1.68449	-1.66187	-1.68117	-1.69277	-1.68484	-1.69161	-1.69422	-1.6959	-1.63392	0.567484
MYO1D	-2.74037	-1.17464	-3.10167	-2.9915	-3.11065	-3.22668	-3.39671	-3.74891	-3.37018	-3.03661	-3.31048	-3.25798	-3.1763	-1.69715	-3.58338	-2.79097	-2.75975	-3.44759	0.351418
TMEM63A	-2.61676	-0.743044	-2.38328	-2.56701	-2.52037	-2.03773	-2.46937	-2.55765	-3.09156	-2.69617	-2.18411	-2.83183	-3.13856	-2.48115	-2.11527	-2.09352	-2.81687	-2.80091	0.565512
PLPBP	-0.0102341	0.225911	-0.164006	-1.13643	-1.21766	-1.48126	-1.64364	-0.496889	0.194737	-2.73588	-0.509549	-0.385266	-0.393507	0.125181	-0.447273	0.0315634	0.478386	-1.05097	0.230681
ADGRL1	-1.54167	-1.2282	-1.98049	-1.90134	-1.51895	-1.7215	-1.75073	-1.91691	-1.76094	-1.98623	-1.52936	-1.61889	-2.02752	-1.37398	-1.56114	-2.18405	-1.82085	-1.46198	0.900953
ENDOD1	2.57636	2.9327	2.39471	2.3139	2.52637	2.56269	2.62506	2.49431	2.61457	2.74596	2.58824	2.46557	2.63229	3.01043	2.34559	2.69875	2.7352	2.56184	0.829498
HAUS5	-2.21059	-2.00831	-1.02692	-0.545665	-1.97095	-2.22817	-1.94276	-0.625489	-1.01647	-1.77978	-0.443986	-1.6708	-1.7373	-2.3014	-0.582455	-1.85271	-1.96492	-0.906231	0.944422
AP2A2	-1.57885	-2.36887	-2.69866	-1.58172	-1.95011	-1.41884	-2.91034	-1.58419	-1.83379	-1.3715	-1.96405	-2.704	-2.5661	-1.44543	-3.60466	-0.712299	-2.88629	-2.61159	0.850955
SEC31A	-1.61796	-1.59056	-1.73768	-1.82252	-1.98609	-1.77152	-1.54773	-1.34413	-2.05098	-1.49015	-1.5397	-1.40136	-2.16601	-1.58755	-1.96627	-1.43813	-1.42159	-1.88154	0.2376
CLSTN1	-1.02992	-1.19191	-2.05515	-1.4276	-2.03868	-0.848104	-1.84776	-3.39171	-1.70969	-0.777568	-1.29506	-2.42646	-1.21911	-1.08687	-0.711772	-1.67132	-2.18061	-0.839283	0.371093
PRSS23	-1.56492	-1.76978	-1.4162	-2.37683	-2.55405	-2.81585	-2.62513	-2.43418	-2.62624	-1.80941	-2.74536	-2.96645	-2.71176	-1.78188	-2.45098	-1.82274	-2.57799	-2.44684	0.0584044
AKR7A3	-0.914815	-1.10207	-1.54833	-1.2711	-1.18958	-1.35706	-1.02678	-1.7435	-0.995355	-1.31214	-1.16725	-1.07342	-1.71908	-1.58483	-1.32938	-1.01674	-1.1728	-1.17169	0.394291
UNC5C	-3.89318	-3.38233	-3.44772	-3.2068	-3.67479	-3.28655	-3.11138	-3.41051	-3.59375	-2.19119	-1.86879	-0.108473	-1.87008	-2.40259	-3.59254	-2.23458	-3.56081	-2.10915	0.0202651
CSPG5	-0.502395	-0.621206	-1.22496	-1.45071	-1.18785	-2.11846	-0.955334	-1.46721	-0.828403	-1.23495	-1.06511	-1.97485	-1.75907	-2.33618	-1.0259	-1.62488	-1.66124	-0.663644	0.291965
RTN3	-3.57895	-0.870039	-3.04199	-2.88487	-3.39396	-4.01045	-2.13649	-3.14832	-3.76996	-2.70882	-2.77054	-3.5613	-3.56105	-3.92438	-2.00927	-3.0114	-4.08922	-1.00785	0.908193
KLHL2	0.0898009	0.912334	0.55489	-0.723025	0.176722	-0.92176	-0.0270684	0.331008	-0.236831	1.44488	-0.439708	-0.24951	1.79423	1.53882	2.40665	-0.0876624	-0.744214	-0.809616	0.00247441
STBD1	-2.74494	-2.26684	-2.83008	-2.85964	-2.13438	-2.57025	-2.72376	-2.41056	-2.93102	-2.72305	-2.57378	-2.21713	-2.82263	-2.75407	-2.34871	-2.96666	-2.81471	-2.86181	0.584894
LYPD3	-1.6574	-1.89284	-1.93099	-1.71826	-1.26663	-1.02281	-1.99241	-1.48255	-1.7018	-1.15388	-1.67458	-1.99312	-1.63773	-1.68314	-1.73925	-0.87434	-1.89822	-1.85675	0.623166
VAPB	-1.11161	-0.696381	-1.28153	-1.20966	-0.986289	-1.65561	-1.26752	-1.03556	-2.29355	-1.618	-0.14934	-0.487196	-0.514283	-1.79956	-0.373055	-1.76098	-0.339039	-0.353639	0.669772
MPZL1	-1.08345	0.419268	0.0434278	-1.46356	-2.65783	-2.00817	0.816583	-1.16262	-1.31413	-1.41081	-1.72179	-1.06855	-0.0770105	-1.37202	-0.733073	-1.21833	-1.21451	-1.16072	0.0731521
CELF2	-3.48701	-2.90057	-3.31063	-3.34004	-3.18795	-2.96738	-3.02465	-3.3579	-2.89024	-3.02157	-2.40756	-3.10382	-3.28998	-3.31815	-3.21383	-3.40581	-3.18069	-2.01108	0.643834
PGLS	3.05524	3.27211	2.96768	3.00137	2.8704	2.92126	3.05218	3.01038	2.98671	2.95673	3.16384	2.92681	2.82882	2.96978	3.06872	2.24773	2.50648	2.91542	0.027451
ATG7	-1.28486	-1.63754	-1.20321	-1.8563	-1.74242	-1.92863	-2.34459	-2.06662	-1.75824	-1.58724	-1.71546	-2.05324	-2.73142	-1.28747	-2.05841	-1.9116	-2.94046	-1.72283	0.330797
TRIM16	-3.46492	-2.33852	-3.43288	-3.57744	-1.51885	-3.15031	-3.46764	-3.35374	-3.03731	-2.99859	-3.08446	-3.0065	-2.73366	-2.74022	-3.37537	-3.54636	-3.20666	-1.23978	0.916153
LYPLA2	-1.49505	-1.78985	-1.77405	-1.91591	-1.86006	-2.17216	-1.79391	-1.7339	-1.82343	-1.57718	-1.87888	-1.76323	-1.87628	-0.965527	-1.79524	-1.67079	-1.86752	-1.91655	0.419472
IPO7	-4.43606	-1.33869	-3.67708	-1.57427	-3.77585	-1.32029	-3.73006	-3.98743	-2.96073	-1.7941	-3.83647	-1.26947	-3.53424	-3.28734	-2.79458	-2.78654	-4.06164	-3.56478	0.5368
TNFAIP8	-3.10166	-3.15593	-3.07244	-3.06697	-2.97815	-3.08727	-3.08338	-3.11959	-2.98089	-3.13791	-3.13304	-3.03904	-2.94945	-2.6816	-3.16629	-3.12116	-3.08488	-3.03051	0.447937
CCN4	-3.4695	-2.04387	-3.9178	-3.30091	-3.32654	-3.07775	-2.14921	-2.87865	-3.34459	-3.65463	-3.38044	-3.06461	-1.91585	-2.33028	-3.37018	-2.12124	-2.16406	-3.39336	0.502952
PGM3	-1.30903	0.241491	-1.4363	-1.79498	-0.800868	-1.18213	-0.837974	-2.69647	-1.58504	-2.88839	-0.487831	-1.02248	-2.12632	-2.08865	-1.76151	-1.37038	-0.623287	-0.84682	0.488729
SVIL	-2.68903	-2.04604	-3.18421	-3.40615	-2.87064	-1.97474	-2.10373	-3.11299	-3.01982	-2.29764	-1.94338	-2.65969	-2.80211	-2.48169	-2.93877	-3.27526	-2.9834	-2.31438	0.818317
PAPLN	-1.43836	-1.3088	-2.55244	-3.13235	-1.70864	-2.05768	-2.50688	0.293028	-2.78335	-1.45756	-1.22144	-2.60072	-3.13264	-1.04026	-2.83922	-0.691714	-2.64963	-1.35214	0.905288
AHSA1	1.01075	0.300628	0.958372	0.793719	1.06349	1.68228	1.146	0.652787	0.921302	1.78704	1.13608	-0.00126348	0.576226	1.28287	0.764275	2.0099	-0.403689	1.10336	0.984214
APOM	1.74582	1.76808	1.75395	1.77091	1.78142	1.95336	1.62575	1.6313	1.63217	1.28024	1.91125	1.52582	1.6745	1.26335	1.65169	1.58263	1.47172	1.64836	0.254971
ADAMTS2	-2.9327	-2.32159	-2.84891	-2.13561	-1.36458	-2.49083	-2.10686	-2.58347	-2.90568	-2.67478	-2.55908	-2.98661	-1.89656	-3.08465	-2.40505	-3.0149	-2.45344	-2.56734	0.341916
PARN	-0.372204	-0.606807	-0.447534	-0.148688	-0.510244	-0.665228	-0.391444	0.551404	-0.414783	-0.0699578	0.245136	-0.571468	1.62461e-05	0.0443869	-0.627397	-0.424669	-0.428747	-0.64646	0.519135
MATN4	-1.67851	-1.41658	-1.82695	-1.27421	-1.7083	-1.11863	-1.8211	-1.7084	-1.60608	-1.97998	-1.00999	-2.0865	-1.47909	-1.30341	-1.82073	-1.39665	-2.74247	-1.131	0.91258
FMNL1	-2.03927	-1.08909	-2.86019	-2.60626	-1.36918	-2.67408	-2.73882	-1.39818	-0.688249	-1.26647	-0.676271	-3.13688	-2.79598	-1.86407	-1.68259	-1.05459	-2.81002	-1.77585	0.958503
SGPL1	-3.00454	-1.57642	-2.73843	-2.01065	-2.89326	-2.61838	-2.05827	-2.76029	-2.93715	-2.97021	-2.38132	-2.52152	-1.91594	-3.1223	-0.898723	-2.58764	-1.64848	-1.1919	0.602994
H6PD	-0.255943	-0.653723	-1.3685	-1.21797	-1.19589	-1.67515	-0.345187	-1.15496	-0.0377019	-0.354342	-0.822325	-0.686012	-1.44916	-0.774307	-1.06562	-1.36952	-0.947366	-1.12616	0.129746
ADGRL2	-1.76539	-1.96227	-1.52474	-2.23079	-1.68254	-2.01573	-1.52444	-1.56528	-1.65776	-2.04021	-1.63909	-1.61183	-2.09309	-2.27402	-1.60324	-2.05149	-1.96038	-1.96466	0.214154
VNN1	0.205489	-0.0921868	-0.129926	0.109477	0.0984702	-0.206959	0.192271	0.557767	0.355401	0.000239663	0.144527	-0.124641	0.256879	0.180334	-0.335048	0.474633	0.430865	0.470484	0.0314196
VNN2	-0.277121	-0.430734	-0.0367264	-0.246395	-0.836306	-0.545492	-0.106497	-0.510791	-0.290998	-0.784294	-0.564695	-1.19305	-0.788579	-0.423721	-0.726694	-0.128086	-0.658658	-0.486551	0.101112
NPTXR	-4.67309	-2.66093	-4.74382	-4.48062	-4.81443	-4.38611	-4.68687	-4.01972	-4.6463	-4.07857	-4.67424	-4.75726	-4.47089	-4.46575	-2.98476	-4.63065	-4.22662	-4.35757	0.796265
NADK	-0.620293	-0.300116	-0.988491	-0.679899	-0.407966	-0.55972	-0.971653	-1.03535	-0.942911	-0.606095	-0.265945	-1.03515	-0.494405	-0.609291	-1.06372	-0.901331	-0.823377	-0.330159	0.541263
ETHE1	-3.44227	-3.24364	-3.56807	-3.37868	-3.42387	-3.71678	-3.45521	-3.37817	-3.06745	-3.60587	-2.6192	-3.50132	-3.44997	-3.44791	-3.50674	-3.08955	-3.02341	-1.72869	0.150617
STAMBP	-2.17595	-0.982196	-2.50081	-0.877545	-1.61818	-2.03262	-2.32143	-2.38093	-2.12649	-1.26506	-2.0489	-1.60289	-2.41433	-2.25785	-2.41878	-2.44683	-2.12893	-2.47446	0.129303
FSTL3	-1.05519	-0.915871	-0.833517	-0.947315	-1.84971	-1.4866	-0.945596	-0.519586	-2.11654	-1.61491	-0.836291	-0.833421	-0.737412	-1.4405	-1.17781	-1.1714	-0.983996	-1.94802	0.837068
PPP1R3D	-1.79142	-2.57494	-3.24009	-2.14044	-2.64712	-2.74562	-2.72483	-2.53687	-2.0641	-2.52238	-2.33153	-1.70766	-1.55007	-1.77618	-1.47571	-2.77483	-2.8482	-2.93624	0.0378211
RAB3D	-0.407928	0.0572946	-0.136024	-0.267049	-0.179371	-0.113492	-0.293173	-0.159734	0.26603	-0.066165	-0.370509	-0.608816	-0.387671	-0.247765	-0.690565	-0.124207	-0.554084	-0.445497	0.361133
SNAP29	-0.808638	-0.0910441	-0.797822	-0.923376	-0.46343	-0.39832	-0.759616	-0.768417	-0.928902	-0.505737	0.0610967	-0.929657	-0.493575	-0.697365	-0.443566	-0.710943	-0.530598	0.00759195	0.738675
OXSR1	-0.200628	-0.358536	-0.46563	-0.673491	-0.46603	-0.5364	-0.227835	-0.68656	-0.200024	-0.466656	0.0690545	-0.584221	-0.0972	-0.50886	0.00435351	-0.500722	-0.0894366	-0.00512474	0.534703
GGPS1	-2.64462	-2.54242	-2.71374	-1.94969	-1.98877	-2.74533	-2.65662	-2.72888	-2.84715	-2.53386	-2.16215	-2.02171	-2.84166	-2.33288	-2.86545	-1.81853	-2.77952	-1.68513	0.164174
HSPA4L	-2.58357	-3.92794	-3.80515	-3.94715	-3.82224	-3.01022	-3.85685	-0.454922	-4.16736	-3.56032	-2.93004	-3.90933	-3.4797	-3.51599	-3.4258	-3.36819	-3.48179	-3.48305	0.929212
LSM8	0.371878	0.125372	-0.493658	0.125592	-0.274865	-0.494626	-0.545295	-0.230885	-0.46519	-0.220073	-0.387063	-0.570321	-0.260953	0.185816	-0.575963	-0.208507	-0.52492	-0.89136	0.421293
AP2A1	-0.463906	-1.17481	1.8173	-1.62268	-1.58607	-0.814587	-0.893915	-1.34231	-1.82381	-1.08641	-1.01783	-1.15816	-2.02631	-0.926894	-1.88031	-0.428195	-1.74711	-1.23408	0.210678
STAU1	-1.29343	-1.92305	-2.53655	-1.25246	-1.76204	-0.726926	-2.22144	-1.66441	-2.46282	-2.13534	-2.49848	-2.52413	-0.491735	-2.60891	-2.47444	-1.56527	-2.15006	-0.569074	0.403782
BAG3	-1.29647	-0.841525	-1.48458	-1.64815	-1.24289	-1.33098	-0.833324	-1.54196	-1.43451	-1.15015	-0.817713	-1.24855	-1.031	-1.59852	-1.25171	-1.00761	-1.17882	-1.22684	0.720297
CRYZL1	-1.0596	-1.60215	-1.65561	-0.933746	-0.0650558	-1.02137	-0.593059	-1.45561	-0.769926	-1.80141	-1.58809	-0.787218	-1.71159	-1.15292	-1.21394	-0.948057	-2.01951	-0.865701	0.360589
AIFM1	-0.371914	-2.27056	-0.89681	-1.54539	-1.95719	-1.63897	-1.79619	-1.99976	-2.2911	-2.04027	-0.654868	-1.29567	-2.00718	-1.91622	-2.47607	-0.897915	-1.33036	-1.33183	0.16715
EML2	2.31468	2.40946	2.4177	2.28023	2.20776	2.19651	2.21165	2.3784	2.40776	2.40536	2.40882	2.02608	2.17794	2.26251	2.25962	2.2705	2.16743	2.38012	0.571179
NUDT14	-2.75388	-2.82902	-2.87198	-2.67461	-2.7225	-2.75702	-2.67437	-2.55457	-2.36179	-2.78416	-2.2328	-2.76273	-2.67861	-2.6867	-2.68295	-2.68466	-2.83352	-2.74963	0.25559
TSPAN13	-1.69376	-1.70408	-1.70971	-1.99469	-1.52133	-0.996684	-2.03726	-1.4877	-1.84824	-1.38879	-2.02379	-1.12638	-1.70445	-1.15737	-0.912041	-1.58965	-2.12454	-1.80044	0.409711
BPNT1	-0.68217	-0.840667	-1.04944	-1.09138	-0.870675	-0.598058	-1.27277	-0.77548	-0.9466	-0.974206	-0.950833	-1.49925	-1.01438	-0.937953	-1.31801	-1.09202	-0.768755	-1.03853	0.588836
FADS2	-1.11008	-1.11803	-1.34266	-2.78371	-1.44054	-1.29437	-2.32996	-2.60996	-1.97801	0.054788	-1.04235	-2.03385	-1.88188	1.69541	-1.86173	-2.36234	-2.27711	-1.19811	0.417298
DDAH2	0.571006	0.533255	0.569203	0.509095	0.246238	0.506469	0.791679	0.533226	0.402712	0.48105	0.466433	0.265165	0.429526	0.554057	0.847439	0.329356	0.52165	0.546909	0.463588
TXNDC12	-1.8553	-2.73194	-3.02312	-2.91828	-2.45498	-2.57186	-2.38638	-2.06164	-2.69546	-2.14156	-2.80048	-2.57981	-2.53886	-2.77677	-0.874492	-2.10568	-3.06626	-1.96197	0.870227
FTCD	-0.926707	-0.627151	-1.04291	-0.751767	-1.00502	-0.96378	-1.02137	-0.95196	-0.887655	-0.886658	-0.891395	-0.940185	-0.897153	-1.06113	-0.828522	-1.00281	-0.920029	-0.443422	0.873873
EFEMP2	-0.608876	-0.839439	-1.19025	-0.603665	-0.949783	-0.789465	-1.13707	-1.07772	-0.53926	-1.19546	-0.414474	-0.657061	-0.786863	-0.823694	-1.16214	-0.606901	-0.450029	-0.873032	0.796142
SCGB1D2	-2.77235	-1.87524	-3.15905	-3.48024	-3.49556	-2.22538	-2.8226	-2.80544	-3.19419	-1.7493	-2.14205	-3.15603	-3.52896	-3.37576	-2.8912	-1.34767	-3.14168	-2.82444	0.484075
CD160	-1.32982	-0.341796	-1.21082	-1.4724	-1.83911	-1.20725	-0.206509	0.0717817	-0.65242	-0.776521	-0.760082	-1.22182	-1.17095	-0.223461	-0.145526	-0.995077	-0.499778	-0.926417	0.0423336
RECK	-0.435892	0.0575961	-0.196693	0.309548	-0.253446	-0.185583	0.334539	0.719002	0.370772	0.103192	-0.166892	0.902052	-0.42982	0.441519	0.112469	0.0304189	0.598352	-0.695798	0.485331
NUDT3	-1.82395	-1.47725	-1.7272	-1.96121	-1.24014	-1.80561	-1.2041	-0.488028	-1.62488	-1.20714	-1.30759	-1.67102	-0.287119	-1.7707	-1.41795	-1.59393	-1.60149	-1.83616	0.4169
AGR2	-2.13217	-1.75661	-1.20482	-1.44546	-1.87852	1.08746	-1.74492	-1.61133	-2.18171	-1.59468	-1.20075	0.606237	-2.14099	-0.536122	-1.95328	-1.24874	-2.70597	-1.21047	0.566744
IL18BP	4.27994	4.13998	3.79314	4.21008	4.37874	4.24016	4.33857	4.11399	4.06271	4.01608	4.41992	4.38087	4.2336	4.02227	4.42331	4.26504	4.20179	4.11979	0.72906
NAPSA	3.93263	3.96101	3.60289	3.73172	3.84218	3.93278	3.91911	3.89068	3.92316	3.93947	4.08656	3.87181	3.85736	3.87637	3.77031	3.82138	3.74421	4.03606	0.702989
MOCS2	-0.301876	0.804434	0.0752698	-0.149495	-0.321954	-0.670598	-0.0601409	0.100358	-0.233935	-0.244903	-0.198866	-0.133758	-0.0561086	-0.313013	0.490749	-0.484577	-0.561323	0.0863248	0.360774
CYB5A	1.27919	1.4136	1.28243	1.28765	1.48523	1.45472	1.0855	1.18982	1.45017	1.34418	1.67104	1.1528	1.20723	1.36173	1.28534	1.38314	1.05564	1.789	0.877941
ADH1C	-0.371848	0.840254	-0.166963	0.719228	0.104559	0.307916	0.225936	0.133963	0.223439	-0.0490988	0.0853635	-0.131851	-0.604527	-0.487568	-0.14969	0.08396	0.108596	0.0359438	0.128572
LDHA	1.9242	2.05095	1.91496	1.77045	1.83991	1.74789	1.91379	2.06801	1.87115	1.98538	2.04757	1.73742	1.36945	1.6398	1.32592	1.0857	0.901357	1.2883	1.8947e-05
ALDH1A1	2.20555	2.05185	1.95619	1.96969	2.10027	2.02313	2.19649	1.93119	2.25885	2.06648	2.33306	2.16108	2.05556	1.97742	2.16926	2.03331	2.03751	2.31788	0.73859
GLUD1	-3.37577	-4.28302	-2.7567	-2.81051	-0.30504	-5.50693	-1.89625	-5.25919	-4.9978	-2.9648	-5.87603	-2.60491	-3.73296	-2.62467	-4.58011	3.0574	-4.61709	-5.33356	0.951575
CYB5R3	-1.14012	-1.03371	-1.12876	-1.18867	-1.71373	-1.56759	-0.841851	-0.955509	-0.905734	-0.393473	-0.326391	-1.54992	-0.922026	-0.703144	-1.31366	-1.22427	-1.36769	-0.920554	0.219608
GSR	1.40754	1.52036	1.34096	1.3603	1.51126	1.31526	1.29664	1.39218	1.22432	1.4088	1.63433	1.32054	1.57657	1.52864	1.38122	1.46334	1.04112	1.6818	0.806065
SOD1	5.37738	5.60009	5.077	5.04897	5.22821	5.44649	5.52461	5.46658	5.30599	5.36595	5.37874	5.60566	5.60994	6.15891	5.89785	5.68334	5.77595	4.73868	0.223235
CP	5.91137	5.90371	5.71838	5.83193	5.9967	6.03541	5.99578	5.7933	5.83963	6.05712	6.2557	5.77845	6.0319	6.38388	6.16541	6.08893	5.6784	6.04477	0.223842
F13A1	-1.79675	-1.42518	-1.33454	-1.29556	-2.10066	-1.61148	-1.76301	-1.73569	-1.47519	-2.20397	-1.98948	-1.52416	-2.13816	-1.88143	-1.52168	-1.68951	-2.52316	-2.03458	0.382093
PNP	2.74041	3.27206	2.76518	2.83126	2.75608	2.84432	3.26966	3.07307	2.94532	3.43583	3.26524	2.97177	3.04881	3.39256	3.20083	2.3531	2.49785	2.46662	0.00189505
HPRT1	2.40749	1.71642	2.21747	2.26342	2.1413	2.38419	2.35899	2.12613	2.31109	1.96121	2.33919	2.10915	2.10003	2.37991	2.22005	1.92684	2.04904	2.02345	0.50596
GOT2	-0.745225	-1.32792	-0.867357	-1.36886	-0.692689	-1.41712	-1.009	-0.891247	-0.882518	-0.702489	-0.207482	-0.921246	-1.08525	-1.01282	-1.18949	-0.944937	-1.01334	-0.639573	0.253913
EGFR	-1.31723	-1.80794	-1.97418	-1.20965	-1.48551	-1.52039	-2.10746	-1.46143	-2.32805	-1.613	-1.52617	-1.87584	-1.75593	-1.93942	-2.58279	-1.12065	-0.723058	-1.45472	0.0389241
PGK1	4.03131	4.12154	3.79755	3.86729	3.82531	3.85619	4.04893	3.9178	4.00665	4.07093	4.12513	3.74602	3.9642	4.21428	3.86862	3.81976	3.79647	3.87525	0.426841
AK1	2.70191	2.73143	2.44057	2.80656	2.83019	2.83644	2.84171	2.80088	2.65789	2.90153	2.99136	2.93272	2.86729	2.70781	2.80236	2.8544	2.75884	2.91964	0.0245851
LALBA	-0.387307	0.127112	-0.398741	-0.430803	-0.0696743	-0.398737	-0.179151	0.0498875	-0.487165	-0.293554	-0.0581253	-0.296885	-0.31092	-0.534718	-0.0675179	-0.0821793	-0.55609	0.223209	0.970842
F2	3.73218	4.01797	3.68687	3.89106	3.92639	3.55505	3.79472	3.76965	3.69497	3.75465	4.10732	3.87721	3.67084	4.09825	4.05244	3.73226	3.87717	3.99514	0.749523
C1R	0.953184	1.07621	0.838249	0.722467	1.10291	1.02269	0.820037	0.86749	0.943123	0.9573	1.24976	0.942271	0.9875	1.10635	1.18763	1.07945	0.867467	1.18464	0.486531
HP	7.71762	7.96385	7.75013	7.82678	7.8684	7.84413	7.8383	7.96831	8.02432	7.83328	7.90843	7.92416	7.91537	8.09213	7.98335	7.85294	8.06389	8.08012	0.140522
HPR	0.369784	-0.357115	1.09091	0.347547	0.224553	0.295604	0.443915	0.268507	0.168872	0.126464	0.750452	0.843776	-0.207026	0.727776	1.05861	-0.502976	-0.281321	0.609815	0.689981
F9	2.21022	2.31941	2.13566	2.14467	2.3788	2.12048	2.2358	2.35863	2.23671	1.84378	2.5259	2.29875	2.14638	1.8771	2.55173	1.97411	2.29595	2.37612	0.998408
F10	1.00717	0.934824	0.663527	0.600029	0.872797	0.864991	0.741624	1.25542	0.854752	0.859777	0.898663	0.697689	0.801651	1.36214	1.29857	0.699355	0.697566	0.860758	0.22762
CFD	0.331416	0.475093	0.208767	0.458528	0.348597	0.124214	0.325572	0.0391174	0.20064	0.184478	0.37403	0.53572	0.347576	0.760124	0.162836	0.434421	0.422893	0.480833	0.574305
PLG	4.27177	4.59324	4.28061	4.29302	4.41035	4.39053	4.41394	4.47129	4.41149	4.36153	4.64517	4.37321	4.48387	4.67634	4.55871	4.23154	4.39161	4.75528	0.649212
F12	0.305095	0.0314918	0.100233	0.244073	0.445588	0.220629	0.299782	0.471788	0.250304	0.0585386	0.633987	0.285951	0.211828	0.27475	0.233005	0.398147	-0.220225	-0.0973452	0.398517
PLAU	-1.07968	-0.620414	-0.831457	-1.08926	-0.793536	-0.874499	-0.888442	-1.03124	-0.85682	-0.765826	-0.692363	-0.590186	-0.610913	-0.894061	-1.72735	-0.853145	-1.22658	-0.646242	0.71758
PLAT	-1.65204	-1.65647	-1.65187	-1.55239	-2.21497	-2.03178	-1.58022	-1.10328	-1.80157	-1.70596	-1.76568	-0.942182	-1.74363	-2.27323	-1.66066	-1.59438	-1.80605	-2.20185	0.380884
CFB	4.71903	5.18221	4.83786	4.91265	4.93362	4.87593	4.79705	4.92098	4.89379	4.90236	5.30932	5.10385	5.06321	5.09631	5.15087	4.96825	4.94766	5.17288	0.229454
REN	-3.39241	-1.20793	-3.07167	-3.14037	-3.16584	-3.29851	-3.3908	-3.29206	-2.96613	-2.80064	-2.64541	-1.09726	-1.79331	-2.94363	-3.07719	-3.17422	-3.45875	-2.68833	0.411842
ADA	1.57698	1.82953	1.14964	1.50231	1.2224	1.43208	1.10438	1.12601	1.50259	1.10911	1.3345	0.91239	1.34895	0.615561	0.759302	1.19526	1.21411	1.61104	0.16714
CA1	6.29556	6.49057	6.19406	6.37081	6.36473	6.38998	6.40708	6.45509	6.35331	6.54543	6.79812	6.62804	6.7057	6.70948	6.86186	6.55962	6.5408	6.71906	0.00079499
CA2	4.52665	4.71763	4.35138	4.39758	4.50312	4.55557	4.63252	4.49546	4.59551	4.61718	5.05785	4.82978	4.51775	4.74926	4.82903	4.51008	4.4825	4.32576	0.053957
ASS1	0.393718	0.530985	0.479762	0.089283	0.505321	0.238511	0.640222	0.484718	0.668135	0.592993	0.747228	0.0263612	0.194835	0.613728	0.310653	0.98702	0.40635	-0.0477124	0.84395
OAS1	-1.61507	-1.58145	-1.72795	-1.43463	-1.67799	-1.58042	-1.49593	-1.63189	-1.45043	-1.61181	-1.00293	-1.67378	-1.68713	-1.63774	-1.45326	-1.49912	-1.51369	-1.67138	0.784186
SPINK1	3.07763	3.66789	3.515	3.07373	3.45726	3.53092	3.25197	3.8224	2.76892	3.34605	3.55555	3.2934	3.48207	2.77183	3.66057	3.15542	3.33875	3.71667	0.994512
SERPINC1	3.71873	3.67544	3.61125	3.78182	3.75064	3.75612	3.74485	3.68539	3.61161	3.82401	3.97826	3.93655	3.94582	4.17596	4.06024	3.60189	3.80938	3.67459	0.000282496
SERPINA1	8.55075	8.53493	8.44612	8.55055	8.60232	8.59945	8.62464	8.56066	8.62657	8.46269	8.81454	8.62795	8.53825	8.8191	8.76944	8.42407	8.42126	8.45492	0.0649819
SERPINA3	8.03649	7.96107	7.89267	8.01497	8.09446	8.04167	8.23457	7.90998	8.24787	8.08098	8.30211	8.05894	8.01931	8.86924	8.21522	7.94703	7.86089	7.67484	0.125994
AGT	5.82814	5.56329	5.20661	5.54888	5.5686	5.50188	5.3578	5.287	5.40692	5.63134	6.10028	5.63351	5.51537	5.8678	6.15633	5.55088	5.35615	5.86761	0.200854
A2M	8.27129	8.25589	7.93419	8.13187	8.25261	8.26716	8.27515	8.12705	8.19647	8.27871	8.48141	8.28612	8.28365	8.55639	8.45559	8.27893	8.15718	8.37276	0.132971
C3	7.79179	7.82658	7.63863	7.69274	7.86048	7.82239	7.92234	7.80165	7.80613	7.84793	8.12576	8.03851	7.87443	8.3148	8.0787	7.77082	7.82992	7.77642	0.03201
C5	1.86405	1.91911	1.84332	1.76955	1.78296	1.81221	1.92773	1.72526	1.81422	1.6686	2.15573	1.62026	1.15583	1.33545	1.16215	1.54793	1.03458	1.13621	0.000797771
TIMP1	2.39534	2.37707	2.52099	2.49871	2.47089	2.39037	2.60421	2.17816	2.52318	2.31602	2.77073	2.35931	2.33254	2.45851	2.37714	2.45266	2.18862	2.5353	0.978577
CST3	2.63715	3.07528	2.53549	2.93923	3.12482	2.78769	2.95363	3.1813	2.87424	3.64595	3.25306	2.57388	2.92629	4.01545	3.15695	3.25077	3.25377	3.18743	0.38839
CST4	1.5537	-1.46994	-2.50732	-1.01909	-0.959136	0.0380164	-2.47412	-1.38954	-2.56068	-1.51769	-1.6036	-1.84626	-1.72939	-0.617672	-1.30535	1.11097	-1.38341	-1.66294	0.542108
CST1	-3.23615	3.35724	-3.34284	-4.30832	-4.50033	-4.50477	-4.62225	-5.71119	-5.51801	-3.89615	-4.74075	-2.41528	-4.79789	-5.27542	-3.17293	1.54291	-4.66776	-4.20442	0.27711
CSTA	2.16924	2.03636	2.17086	2.43233	2.22752	2.17773	2.37838	2.44139	2.32509	3.65868	2.22214	2.15207	2.03845	1.91856	2.07518	2.47151	2.0759	2.20743	0.367347
KNG1	7.15761	7.32747	6.98279	7.09743	7.13934	7.14706	7.1728	7.12646	7.17587	7.09629	7.34581	7.00694	7.12275	7.46866	7.25193	7.26513	7.23838	7.35655	0.488846
NRAS	0.881172	0.783881	0.766507	0.876224	0.900561	0.733153	0.710919	0.505084	0.823904	0.588865	1.03752	0.874961	0.528316	0.222787	0.519324	0.614713	0.44872	0.746752	0.0377254
HRAS	-2.10073	-2.17101	-2.17177	-1.7319	-2.09768	-2.26457	-2.16546	-2.01044	-2.04345	-1.73505	-1.46443	-1.86759	-1.5355	-2.02614	-2.17433	-2.16429	-2.13671	-2.01169	0.132898
KRAS	-2.69447	-1.39683	-1.76378	-2.39369	-2.00919	-2.18445	-1.20033	-1.10388	-1.54635	-2.02784	-1.897	-2.33461	-1.69438	-1.35161	-1.24553	-1.08044	-1.43004	-1.07657	0.0102205
PDGFB	-0.787523	-0.346166	-0.329282	-0.332826	-0.705373	-0.00582354	-0.265126	-0.552038	-0.604057	-0.696141	-0.402521	-1.35873	-0.10539	-0.720006	-0.741391	-0.205858	-0.214832	-0.667507	0.578291
LDLR	0.439577	-0.0206431	0.147351	-0.0466495	0.315946	0.046966	0.386326	-0.040898	0.691692	-0.624206	0.315941	0.334105	0.082361	-0.0846876	-0.114827	-0.331167	0.0253327	0.103774	0.600186
EGF	2.51338	2.65347	2.38771	2.4777	2.53009	2.4098	2.50949	2.6742	2.52179	2.55888	2.79684	2.45593	2.33084	2.50352	2.27122	2.3966	2.33796	2.53844	0.220169
TGFB1	-4.37941	-4.21955	-4.46515	-4.27543	-4.35345	-3.89279	-3.60151	-2.8802	-4.25475	-4.15594	-4.01148	-4.28959	-4.40191	-4.19135	-3.95238	-4.37227	-4.62179	-4.57664	0.0621154
POMC	-0.726391	-0.144449	-1.19717	-1.26482	-1.22986	-0.629432	-1.21674	-1.15784	-1.56433	-0.449235	-0.67314	-1.9956	-0.673369	-0.928993	-1.29273	-0.910697	-1.52805	-0.683101	0.772091
PENK	0.04998	0.216341	-0.646361	-0.0713687	-0.44793	-0.250965	-0.12291	0.125944	-0.34311	-0.0668235	0.0235463	-0.399086	0.257901	-0.122885	-0.286908	-0.430323	-0.282601	0.104976	0.962723
CGA	-7.26505	-8.6257	-7.24625	-10.0503	-9.74969	-6.797	-12.0495	-6.7015	-12.5877	-8.98213	-7.71421	-7.17891	-11.6726	-8.92912	6.73898	-4.09848	-8.4092	-10.9881	0.756837
FSHB	-0.618955	-0.781275	-0.774792	-2.26155	-0.586218	-0.656099	-1.43851	-0.933449	-1.20992	-1.37124	-0.521143	-1.09847	-0.0881118	0.899928	-0.659569	-1.90183	-0.531583	-0.719929	0.206735
LHB	-0.51512	-0.28926	-0.0827604	-0.880817	-0.068836	0.0349185	-0.815395	-1.06338	-0.599582	-0.161206	-0.248613	-0.717844	-0.863501	0.0184728	-0.567056	-0.180378	-0.657364	-0.289683	0.454754
CALCA	-1.24771	-1.25692	-1.17852	-2.09674	-1.87825	-2.0644	-2.20364	-1.31841	-1.49705	-0.848449	-1.25604	-2.02914	-2.12157	-1.96918	-2.06575	-2.64315	-1.48427	-2.41937	0.065991
IGF2	0.593949	0.531879	0.213447	0.246448	0.351311	-0.551356	0.27465	0.442191	0.0144634	0.524225	-0.0512587	0.91217	0.508186	0.947606	1.12392	0.575831	0.811831	-0.113952	0.243727
IL1B	-6.07467	-5.36639	-5.79929	-6.01676	-6.13135	-6.56747	-6.22916	-6.67908	-6.11679	-6.16242	-6.04045	-3.59246	-6.31642	-6.83039	-5.96793	-5.7092	-5.81543	-6.37975	0.361001
IL2RA	0.478305	0.335801	0.885844	0.0894012	0.246855	0.0254682	1.17235	0.631344	1.27944	0.935684	0.25209	0.509786	0.333878	1.07045	0.745065	0.399627	0.469875	0.395696	0.0360207
JCHAIN	4.53307	4.4483	4.28482	4.269	4.35515	4.31602	4.60971	4.56599	4.60641	4.20919	4.28254	4.71073	4.57367	4.52341	4.82624	4.14988	4.57152	4.0313	0.130977
IGKV1D-33;IGKV1-33	4.21681	4.24244	4.34052	4.36324	5.06637	4.87002	4.53911	3.69102	3.95896	4.63015	4.5702	4.14435	4.57707	5.60909	4.80116	5.36988	4.06397	4.53972	0.17439
IGKV1-39;IGKV1D-39	2.27215	2.33961	1.52953	1.15793	1.86716	2.21658	2.1093	1.69028	2.21026	1.17761	2.06995	3.16312	2.29319	2.15348	1.79333	1.79048	2.42509	1.51027	0.959611
IGKV1-17	1.99685	2.38274	1.89566	1.69684	2.16033	1.97827	1.97579	2.01217	1.92797	1.76065	2.32989	2.09598	2.00379	2.12551	2.11197	2.04701	2.26378	2.37632	0.58677
IGKV1D-16	0.662122	0.877613	0.737603	1.03254	-0.0288182	0.547608	0.231015	0.754963	0.197805	0.733641	1.11891	0.812066	0.890891	1.06236	1.32616	0.548284	0.55065	1.34585	0.216009
IGKV1-5	3.24272	3.0984	3.03064	2.89523	2.99213	3.24517	3.15655	2.85558	3.22881	3.20499	3.31951	3.03082	3.46658	3.37846	2.93361	2.84649	3.03838	2.99648	0.447179
IGKV3-20	6.60274	6.50428	6.23594	6.41668	6.29317	6.48144	6.50922	6.40225	6.21517	6.23252	6.46294	6.41727	6.42864	6.24252	6.48081	6.28537	6.27038	6.33345	0.815792
IGKV3-15	6.02711	5.31282	5.24235	5.73721	5.80967	5.75925	5.40024	5.82109	5.90445	5.53431	5.05244	5.95848	5.53411	5.39848	5.54188	4.77991	5.50298	5.93527	0.821895
IGLV1-44	2.57899	2.89418	1.89017	1.95362	2.38631	2.54453	2.39492	2.30428	2.66997	2.8796	2.23497	2.44576	2.89099	2.66223	2.58217	2.14722	2.4279	2.62397	0.703177
IGLV1-47	2.99583	3.4598	2.49153	2.97768	2.20709	3.18178	3.33304	2.93874	2.40362	3.35929	3.85835	3.66774	3.91518	3.3867	4.39849	3.11167	3.48047	3.43541	0.0418257
IGLV1-51	3.0949	3.30884	3.0279	3.11425	3.14272	2.94781	2.99343	2.91298	3.25263	2.84649	3.51767	3.25962	3.34331	2.98411	2.89733	3.13908	2.90838	3.59326	0.925051
IGLV1-40	1.96953	2.33177	1.85595	1.8613	2.02899	2.31398	1.69645	1.56216	1.9466	2.23726	2.23404	1.49071	2.11201	2.1225	2.41624	2.43295	1.34442	2.79314	0.715732
IGLV2-14	-2.68349	-2.56942	-2.67782	-2.71357	-2.79745	-2.41512	-2.78866	-2.68598	-2.57226	-2.73175	-1.55874	-2.47722	-2.65826	-1.80428	-1.72518	-2.70261	-2.72587	-2.51498	0.201142
IGLV2-23	-1.72577	0.474683	-0.165173	0.0396133	-0.910686	-1.30914	-0.865154	-1.86997	-1.51409	-0.0197274	-1.5597	-1.4782	-2.15953	1.8882	0.0567939	-0.0615486	-0.35763	0.695919	0.55876
IGLV2-11	1.26832	1.78047	1.50804	1.42537	1.32618	1.45505	2.00765	1.80623	1.71238	2.05158	1.79449	1.57509	1.78898	2.99949	2.0363	1.81265	1.94529	1.40588	0.0808241
IGLV2-8	2.36761	2.57046	2.07618	1.65882	2.67529	2.28254	2.57525	2.40206	2.63587	3.4055	2.59694	2.52271	2.39415	1.84324	1.38412	1.59801	1.52167	2.83494	0.214931
IGLV3-19	2.55923	2.94476	2.21077	2.57187	2.6781	2.54976	2.79065	2.76783	2.49864	3.0108	2.9866	2.90708	2.90137	2.45945	2.94386	2.58027	2.85751	3.12789	0.314483
IGLV3-1	1.35263	1.70519	1.39184	1.31571	1.52768	1.49832	1.45481	1.3841	1.54581	1.44859	1.96131	1.63894	1.73079	1.87421	1.76274	1.57138	1.69356	2.00751	0.0931979
IGLV3-25	2.73498	2.90664	2.87277	2.79074	2.85579	2.8964	2.92859	3.17538	3.12959	2.88862	2.92245	2.74499	2.81631	2.71097	2.71254	3.02819	2.7878	3.15214	0.0372322
IGLV3-27	-0.324856	0.0877707	-0.372979	-0.199729	-0.22609	-0.21359	-0.529492	0.252056	-0.628359	-0.218064	-0.45838	-0.512695	0.173802	-0.462048	0.0170506	-0.0335113	0.0183678	0.222594	0.426434
IGLV6-57	-0.462117	-0.328699	-1.52096	-0.735192	-1.21245	-0.658157	-0.0933406	-1.57009	-1.47847	-0.175831	0.271818	-0.708664	0.218889	0.219009	1.37793	-0.766296	-1.00508	0.0312595	0.0551604
IGHV1-69	2.03328	1.58772	2.1687	2.04078	2.11248	1.89425	1.78799	2.15786	2.25253	2.5116	2.49974	2.47743	2.56037	2.15533	2.38043	2.35279	2.63692	2.08862	0.0386461
IGHV1-46	-1.37898	-0.568785	-1.13443	-1.08013	-1.12312	-0.303254	-0.106853	-0.549255	-0.77128	-0.1763	-0.437818	-0.926841	-0.570308	1.02667	-0.372708	-1.06758	-0.712795	-1.04707	0.165173
IGHV3-11	4.53263	5.38796	5.60818	5.69344	5.79142	5.83866	5.71582	5.75234	5.64571	5.66321	5.67012	5.49487	5.51636	6.48599	6.02107	5.92679	6.06749	5.41923	0.145587
IGHV3-23	-0.952042	-1.88595	-1.20089	-1.27435	-1.23999	-0.390798	-1.06125	-0.950265	-1.64313	-0.688042	0.129107	-1.06938	-1.52192	-0.0733253	-0.386883	-0.82684	-1.70094	-0.862625	0.458
IGHV3-13	0.765336	1.08311	1.18545	1.20746	1.10542	1.11718	0.966543	1.06084	1.22911	1.12874	1.62737	1.01697	1.22616	1.05339	0.764412	1.45998	1.58745	1.49138	0.0657887
IGHV3-53	-3.52893	-3.19265	-3.88541	-2.17737	-2.00379	-3.39355	-1.89929	-2.62655	-3.61715	-2.75462	-2.23728	-1.78507	-2.41577	-1.6233	-1.56686	-2.16841	-4.00777	-3.67986	0.0931674
IGHV3-30;IGHV3-30-5	4.36657	4.30698	4.2559	4.63681	4.47624	4.24601	4.64883	4.45839	4.64685	4.88813	4.76931	4.51559	4.52225	5.11494	4.53533	5.10793	4.66479	4.71122	0.0831297
IGHV3-33	-0.0622901	-1.61611	-1.50862	-0.548177	-0.218724	0.355717	-0.340659	-2.36475	-0.510999	-0.490556	0.119986	-0.894738	-0.610194	0.366038	-0.941108	0.50044	-1.75335	-2.06558	0.649399
IGHV3-7	4.60613	4.73882	4.66063	4.70986	4.59832	4.60155	4.66481	4.73857	4.58732	4.61386	4.95507	4.56921	4.83819	4.69261	4.77868	4.74448	4.71046	5.12667	0.421677
IGHV3-9	1.47881	1.55399	1.53365	1.73661	1.7306	1.75438	2.30962	1.71797	1.34381	1.90177	1.99408	2.31024	1.96095	3.26187	2.17451	1.95253	2.42456	1.2678	0.205914
IGHV2-70	-2.06063	-1.86779	-2.34476	-2.05661	-2.04724	-2.17269	-2.30313	-1.57943	-2.00427	-2.06326	-1.49603	-2.93252	-1.50658	-2.3382	-1.47142	-1.44872	-1.57913	-1.68773	0.477461
IGHV2-5	-0.132373	-0.258303	-0.534207	-0.308549	-0.287223	-0.226528	0.0160699	-0.0616925	-0.832667	-0.653585	-0.210232	-0.514051	-0.246239	-0.72749	-0.570766	-0.200049	-0.369459	-0.869008	0.826206
IGHV4-39	-1.0442	-3.11768	-1.79131	-0.790564	-0.735784	-0.915981	-1.76824	-2.49087	-2.35905	-1.49581	-0.85824	-2.20421	-1.0581	-1.04951	-2.03258	0.0184319	-2.62053	-1.4558	0.378523
PIGR	4.60871	4.76522	4.42629	4.6273	4.60772	4.65937	4.47307	4.56347	4.74119	4.46229	4.70321	4.54883	4.7129	4.63039	4.64234	4.81872	4.59992	4.81115	0.52689
IGKC	8.29188	8.45595	8.11324	8.13219	8.12026	8.24877	8.36425	8.29784	8.35347	8.24401	8.34645	8.46818	8.62835	8.19112	8.84271	8.31549	8.71006	8.09742	0.398304
IGHG1	8.72642	8.84832	8.7004	8.68519	8.77349	8.79588	8.91894	8.7535	8.87981	8.87227	8.92408	8.82333	8.96234	8.78953	8.92139	8.85534	8.97	8.79855	0.158527
IGHG2	8.3618	8.24943	8.24937	8.14945	8.39368	8.24451	8.4386	8.27776	8.42906	8.22314	8.37537	8.29949	8.33841	8.50684	8.42423	8.33171	8.28552	8.13221	0.210001
IGHG3	4.0473	3.65573	3.85855	3.79305	4.05256	3.88031	3.83896	3.84194	4.32114	3.54603	3.86896	3.76435	3.39941	3.86559	3.60928	3.45662	3.40817	3.97705	0.281882
IGHG4	3.45491	3.80872	3.62118	3.7354	3.66294	3.83064	3.75089	3.51033	3.51679	3.88803	3.91409	3.52138	3.73186	3.98189	3.56983	3.82295	3.45264	3.99574	0.779507
IGHM	6.10022	5.95264	5.78116	5.98407	6.06707	6.07008	6.37495	6.21271	5.92597	5.98141	6.2525	6.55291	6.41862	6.47898	6.5532	6.15732	6.45806	5.84576	0.0974124
IGHA1	7.54686	7.88091	7.58667	7.66656	7.82914	7.77768	7.88597	7.75682	7.67868	8.02748	7.84067	7.75972	7.69586	8.1699	8.02973	7.87293	7.85956	7.7484	0.293836
IGHA2	6.1598	5.94154	5.79868	6.05699	6.14568	6.13049	6.39147	5.92118	5.93067	6.04818	6.53668	6.60591	6.37024	6.34735	6.61919	6.36219	6.39074	6.38025	0.0434346
IGHD	2.40358	2.46528	2.33153	2.29572	2.34079	2.20602	2.3584	2.24695	2.47598	2.40474	2.63363	2.47755	2.58245	2.85692	2.63195	2.26446	2.32317	2.46081	0.00616731
HLA-B	-0.458933	-0.10394	-0.376176	-0.265203	-0.20948	-0.508201	-0.296989	-0.670587	-0.268553	-0.427479	-0.145527	-0.482223	-0.555118	-0.298835	-0.293939	-0.379385	-0.27322	-0.0307001	0.856319
HLA-DRA	0.759106	0.517009	0.399904	0.435546	0.55603	0.731305	0.689671	0.409959	0.331516	0.793483	0.809081	0.450607	0.577038	1.07196	0.548784	0.845521	0.149689	0.524589	0.748966
HLA-DRB1	0.547529	0.903634	0.507937	0.33404	0.645514	0.656551	0.342659	0.283888	0.69168	0.689473	1.02701	0.110562	0.484452	0.721811	0.273781	0.682782	-0.21245	0.939364	0.971136
HBZ	0.813188	0.641686	0.785474	0.932248	0.695223	0.606683	0.46389	0.957091	0.663175	0.113833	1.16808	0.240651	0.721144	0.04048	0.335021	0.194919	0.278181	1.24214	0.791433
HBD	8.98237	8.81075	9.15503	9.25196	9.22795	9.27703	9.26291	9.3043	9.03822	8.889	9.33135	9.56781	9.09503	9.40018	9.63354	9.10261	9.32354	9.11614	0.372545
HBE1	3.27435	3.36772	3.46768	3.50229	3.59571	3.00831	3.88726	3.38738	3.11402	2.8614	3.02477	3.13223	2.40249	2.5886	3.46039	3.67449	3.50995	3.33398	0.121078
MB	-0.962013	-0.342964	-1.90639	-0.923008	-0.84138	-1.30491	-1.31837	-1.27541	-0.801628	-0.398932	-1.2446	-1.63726	-1.03249	-0.541813	-1.70809	-0.675462	-1.13919	-1.2586	0.999771
COL1A1	0.866571	1.13121	1.00096	1.46748	1.06352	1.16559	1.17864	1.29358	0.269828	1.24144	1.18324	1.07494	1.15556	1.07062	1.22594	0.868304	1.02329	1.36091	0.737229
COL3A1	2.33929	2.94234	2.34125	2.43528	2.23033	2.47986	2.66135	2.99833	1.87873	2.29157	2.68322	2.46781	2.62453	2.48337	3.08515	2.32609	2.26072	2.95541	0.896009
COL4A1	5.22499	6.58774	6.041	6.57028	6.30919	6.75638	3.80714	6.55556	6.07201	5.96625	7.31563	3.37263	5.9283	5.30559	5.80456	6.52549	5.01361	7.09714	0.845662
CRYAB	-0.359242	-0.452353	-0.660355	-0.457351	-0.394233	-0.388976	-0.422761	-0.553631	0.158692	-0.306132	0.0423646	-0.394234	-0.499634	-0.895199	-0.319909	-0.350509	-0.581669	0.0117446	0.547396
KRT14	1.64659	1.6014	2.32882	1.79115	1.34536	4.92137	1.87041	1.84705	2.2587	3.66271	1.37486	0.758686	1.48132	1.48401	2.02728	3.87542	1.11157	2.05537	0.906734
KRT6A	-1.48651	-1.14697	-1.62248	-0.949618	-1.46028	0.0396071	-1.2901	-1.75826	-1.14919	-0.147499	-1.4569	-1.22455	-1.49764	-0.886691	-0.0659167	0.00109743	-1.29899	-1.43494	0.686187
LMNA	-0.417525	-0.353271	-0.348519	-0.423154	-0.277471	-0.477212	-0.0820125	-0.425656	-0.306346	0.157041	-0.311101	-0.472597	-0.208198	-0.316295	-0.354637	-0.25777	-0.438711	-0.333318	0.753576
SPTA1	0.378156	0.288163	-0.126499	-0.574523	-0.384697	-0.342607	0.38083	-0.948002	0.477876	-0.183724	1.07023	0.0242717	-0.106766	0.152053	0.680426	0.966131	0.329603	0.497616	0.257593
APOA1	8.44043	8.60242	8.59732	8.62341	8.73647	8.65655	8.65105	8.65102	8.73356	8.49234	8.75145	8.49536	8.47135	8.7716	8.79496	8.70407	8.82398	8.37945	0.788658
APOE	3.0483	3.38418	3.02913	3.13248	3.33027	3.22529	3.37506	3.34217	3.16051	3.18247	3.55215	3.30662	3.25814	3.4512	3.3516	3.19821	3.33897	3.28462	0.507265
APOA2	5.98587	6.30943	6.41327	6.58361	6.6564	6.72436	6.11028	6.37243	5.85698	6.09464	6.54204	6.35248	6.312	6.5461	6.59266	6.54568	6.46593	6.23193	0.05738
APOC1	3.67787	4.05321	3.58863	3.71862	3.68081	3.66866	3.85481	3.9086	3.67384	3.66561	3.8343	3.72755	3.80715	3.97179	3.68848	3.57232	3.72823	3.70207	0.663812
APOC2	1.13051	1.69749	1.44265	1.73645	0.987483	1.77834	1.41718	1.76326	0.803953	1.18644	1.50079	1.22512	1.3828	1.29012	3.3588	0.680019	1.02062	1.47601	0.523207
APOC3	5.08682	5.51779	5.12982	5.24861	5.15838	5.30025	5.18637	5.22371	5.10057	5.09411	5.24956	5.24337	5.24484	5.50595	5.33	5.12283	5.26166	5.4625	0.646425
FGA	7.10268	7.30208	6.94734	7.08902	7.16259	7.09923	7.30294	7.24905	7.2621	7.27871	7.19013	7.11079	7.32469	7.57575	7.56613	6.95243	7.11722	7.16313	0.00638041
FGB	7.98315	7.94701	7.89705	7.84192	7.96515	8.04501	8.20352	8.06333	7.90963	8.14424	8.01623	7.94965	8.06109	8.78233	8.36483	7.9163	7.91869	8.03188	0.0499524
FGG	6.59399	6.65755	6.70607	6.59968	6.59437	6.49569	6.93326	6.93384	6.56548	6.74474	6.86389	6.91713	6.87393	7.06776	7.08774	6.53668	6.7602	6.57439	0.00623485
GYPA	-4.18383	-3.0798	-2.79327	-4.61462	-4.42908	-4.3346	-3.6143	-4.37258	-2.7007	-4.00606	-3.07392	-3.2666	-3.19125	-2.32535	-2.30456	-5.57289	-2.88885	-2.92508	0.235715
SLC4A1	3.41322	3.00027	2.66885	2.2669	2.63198	2.47205	3.28311	2.00043	3.39445	2.77402	4.46523	2.97878	2.64863	3.25676	3.90589	3.63629	3.02792	3.6165	0.383263
CRP	5.12664	4.91272	4.79899	5.04357	5.15287	5.18381	5.22486	4.86798	5.08962	4.89998	5.1937	5.19755	5.14041	4.94755	5.1459	5.10159	4.88498	4.7233	0.456032
APCS	4.77438	4.79021	3.16062	4.79258	4.80706	4.68299	4.7092	4.82031	4.81871	4.73952	4.8531	4.78429	4.81622	4.84743	4.84904	4.77338	4.79756	4.95991	0.422223
C1QA	1.2869	0.104331	0.483294	1.24182	1.57396	1.51589	1.38377	0.635828	0.608326	1.14281	1.57756	0.191424	0.872499	1.30557	0.737537	2.29182	0.603476	0.863077	0.604706
C1QB	0.492865	0.787575	0.463416	0.588561	1.10675	0.711227	0.994998	0.786805	0.819534	0.606057	1.26228	0.44351	0.349885	0.761011	0.310793	1.28068	0.445126	0.959214	0.496673
C1QC	1.75312	2.35489	1.48852	1.76909	1.71528	1.89124	1.70523	1.94843	1.63994	2.04589	2.16539	2.03323	2.13066	1.78478	1.73966	1.78608	1.47583	2.28175	0.768354
C9	3.21737	3.61938	3.21462	3.14798	3.24068	3.23508	3.32025	3.44946	3.3525	3.11077	3.57011	3.3336	3.32776	2.95856	3.4713	3.02154	3.2279	3.26467	0.684744
APOH	5.1603	5.47301	5.30174	5.13678	5.494	5.41852	5.21114	5.22627	5.61674	4.98043	5.61673	5.28832	5.15702	5.22365	5.29357	4.91818	5.4867	5.62456	0.98567
LRG1	7.08287	6.99548	6.80389	6.94611	7.22077	7.1948	7.07054	6.89898	6.90544	7.04397	7.2827	7.14924	7.17243	7.11436	7.33156	7.30766	7.08871	7.02294	0.156836
FN1	3.90562	3.82585	3.64998	3.87773	3.89002	4.05874	3.99165	3.94501	3.84776	3.92279	4.17462	3.70853	4.01528	4.12424	4.02113	4.07444	4.07209	4.39839	0.0926984
RBP4	2.76546	2.94561	2.79772	2.51242	3.0384	3.06467	2.84151	3.16229	3.05504	2.94049	3.00396	2.75297	2.61467	3.05775	3.02229	2.73905	2.68086	2.97929	0.817871
AMBP	7.66248	8.19579	7.60193	7.87541	7.85934	7.90126	8.29851	7.9745	7.93761	8.38443	8.3632	8.20239	8.15685	8.94216	8.80113	8.05794	8.29712	8.15964	0.013251
ORM1	9.63795	9.31351	9.40639	9.43835	9.46177	9.55253	9.62773	9.46868	9.57602	9.29189	9.55255	9.81978	9.49493	9.45704	9.79415	9.66206	9.54512	9.2472	0.926795
AHSG	5.37399	5.57198	5.32802	5.42436	5.48833	5.42191	5.46947	5.61896	5.69406	5.34476	5.68378	5.48519	5.55316	5.40826	5.89965	5.49795	5.48491	5.62725	0.539518
TTR	6.97176	6.47835	6.55652	6.67076	7.10443	6.9709	6.67706	6.41556	6.60731	6.76325	7.28445	6.63805	7.14721	6.97294	7.31228	7.54924	6.80587	7.06382	0.102436
ALB	9.9888	10.1414	9.9	10.0217	10.0697	10.1096	10.1596	10.0044	10.0537	10.1364	10.4154	10.1507	10.3539	10.3676	10.7161	10.3737	10.3101	10.0992	0.0109238
GC	6.09324	6.27199	6.02166	6.09543	6.17228	6.18343	6.18502	6.0856	6.23104	6.076	6.34533	6.29891	6.18865	6.37487	6.22129	6.27189	6.28165	6.405	0.22476
PPBP	1.65835	1.75385	1.43134	1.30404	1.50275	1.28317	1.69419	1.56178	1.53282	1.66786	1.55583	1.30522	1.60079	1.59306	1.47383	1.58043	1.7582	1.61808	0.15764
PF4	0.535183	0.178347	0.0353379	0.548735	0.434028	0.244809	0.318036	0.816276	0.391904	-0.030043	0.562527	1.23222	0.725443	0.155564	0.919116	0.0364634	0.745024	0.214534	0.822916
CXCL10	-2.52731	-2.73111	-2.71862	-2.48667	-2.47968	-2.75582	-2.3508	-1.67567	-2.64107	-2.37724	-1.7787	-2.54212	-1.95041	-2.64857	-2.30047	-2.75695	-2.41804	-2.63116	0.358303
TFRC	0.0784649	0.128617	-0.030502	-0.108875	0.0891965	0.174173	0.188256	-0.106304	0.085312	0.0560152	0.317404	0.0936393	0.106218	0.188654	0.19916	0.108154	0.185602	0.371151	0.440546
TF	9.52578	9.63369	9.59775	9.65583	9.63976	9.595	9.54765	9.64347	9.70916	9.64276	9.77127	9.71592	9.79031	9.85415	9.9884	9.82654	9.89723	9.72666	0.00212489
LTF	6.26511	6.08779	5.95949	6.16104	6.29798	6.17741	6.24355	6.2509	6.30126	6.00585	6.48571	6.3726	6.18902	6.11495	6.23361	6.14044	6.12024	6.2631	0.580696
HPX	8.01819	7.92768	7.88457	8.08156	8.18505	8.1272	8.08665	7.92979	8.10651	8.14882	8.33096	8.09827	8.11003	8.50926	8.40345	8.21664	8.0331	8.07384	0.0241199
FTL	0.649522	-0.0143888	0.156428	0.249315	0.244748	0.242365	0.735796	0.209671	0.0215281	0.113725	0.680146	0.350005	0.801452	0.0694173	0.750756	0.087184	0.297845	0.461759	0.837934
FTH1	-0.0781852	-0.298844	-0.589127	-0.320449	-0.555777	-0.753266	-0.0172825	-0.346559	-0.676655	-0.55687	0.302162	-0.469431	0.310533	-0.537982	-0.190318	-0.491083	-0.331419	-0.279482	0.760495
PRH1	-1.11606	-0.737686	-2.10271	-1.44613	-1.32999	-1.10872	-1.07807	-1.3452	-0.99478	-1.45201	-1.07603	-1.2688	-1.22171	-1.64401	-0.639553	-1.32278	-1.30004	-1.50443	0.968266
SMR3B	-4.29469	-0.754606	-3.74729	-3.19485	-3.06165	-2.56446	-3.64554	-3.91069	-3.8613	-2.96963	-3.56545	-3.11374	-4.14287	-4.25949	-0.672428	-1.78727	-1.06465	-4.42796	0.886881
ANG	-2.05683	-2.81892	-1.76097	-1.36951	-1.157	-1.2448	-1.51715	-0.617976	-1.98869	-1.18311	-0.918649	-1.78057	-1.78412	-1.83046	-2.06459	-0.5995	-0.895292	-1.09684	0.0236139
F11	0.391676	0.487583	0.334993	0.45138	0.402772	0.576258	0.425954	0.599076	0.674223	0.441339	0.591284	0.357599	0.312961	0.260995	0.379575	0.444846	0.430786	0.376652	0.0864946
KLKB1	3.53686	3.78805	3.42468	3.64136	3.65119	3.52247	3.51752	3.67982	3.71574	3.47394	4.03681	3.70509	3.82346	3.56132	3.65263	3.71983	3.81097	4.02773	0.439417
MMP1	-2.01695	-1.11	-1.54178	-1.68375	-1.78272	-2.45656	-2.24208	-2.38526	-2.3372	-2.28461	-2.39735	-1.68987	-2.15727	-1.44613	-2.27839	-1.78516	-2.39973	-1.72917	0.323926
SLPI	-2.1005	-1.22655	-1.75356	-1.43183	-2.0402	-2.20002	-2.61089	-1.56746	-1.96042	-1.6643	-2.0851	-1.27377	-2.31634	-1.87968	-1.59597	-2.7905	-1.48627	-1.62605	0.912835
C4BPA	3.06732	1.9131	2.2681	2.84796	3.24852	3.06962	2.96354	2.56118	3.04019	1.78705	2.75369	1.9812	2.3785	2.88244	2.69969	2.21757	1.41889	1.99809	0.0315371
VTN	5.03136	5.07571	5.05501	5.05531	5.2174	5.2207	5.2687	5.36412	5.27431	4.81752	5.36298	5.01107	5.04847	5.11996	5.4383	5.23493	5.20461	5.34444	0.308611
CAT	5.46738	5.60399	5.37563	5.46179	5.43074	5.4123	5.4841	5.54511	5.46037	5.47658	5.74669	5.56606	5.60766	5.64786	5.62458	5.58343	5.54574	5.72622	0.0738665
GBA1	-0.184983	-0.353843	-0.621227	-0.445801	-0.342871	-0.0610197	-0.254836	-0.0849243	-0.291257	1.49111	0.00651298	-0.177656	-0.325252	-0.303767	-0.214264	-0.0180552	-0.361333	0.0869425	0.231884
FUCA1	3.44077	3.58439	3.20623	3.3448	3.30861	3.44289	3.34085	3.26634	3.34473	3.42769	3.69615	2.93106	3.46595	3.49261	3.4455	3.44749	3.20386	3.83514	0.906707
PROC	-1.01297	-1.76933	-1.52346	-1.19891	-1.23757	-1.33546	-1.39553	-1.51028	-1.04819	-1.23601	-1.34112	-1.20888	-1.28618	-1.55406	-0.909741	-1.49024	-0.806411	-1.97982	0.957934
ALDOA	4.01338	4.12228	3.82218	3.91805	3.99862	3.968	4.09892	3.94725	4.0648	4.18974	4.19346	3.99637	4.16587	4.1502	4.16265	4.06343	4.03133	4.15251	0.110021
CSTB	2.11521	2.05828	2.01962	2.19026	1.88819	2.11981	2.00231	2.04981	2.31133	1.4731	2.33395	2.37194	2.18805	2.17912	2.16139	1.83134	2.35086	2.3191	0.982723
ANXA1	2.44955	2.52778	2.15977	2.55932	2.6745	2.5977	2.69318	2.50224	2.7418	2.53865	2.99336	2.24938	2.51957	3.02087	2.59576	3.25224	2.94087	3.00783	0.0515876
APOB	4.97073	4.88827	4.76624	4.8144	4.91102	4.88723	4.97632	4.86291	4.78463	4.81027	5.14973	4.90109	4.90826	5.08867	4.92204	4.69042	4.73071	5.0695	0.764022
CLPS	-1.91203	-2.34622	-1.8056	-2.26531	-2.0231	-0.835075	-2.42091	-2.05708	-1.27014	-2.55009	-2.23919	-2.22481	-2.34915	-2.17567	-2.60934	-1.63109	-2.14003	-2.52755	0.511511
TFF1	1.30942	1.48778	1.17165	0.283843	1.67869	1.74951	1.22541	1.36338	1.40627	1.08892	1.25383	1.50278	1.19905	1.13824	1.46569	0.910405	1.2826	1.61413	0.999619
PRNP	-0.594021	0.00248136	-0.60127	0.191844	-0.261568	-0.0240375	-0.032297	0.238912	-0.318735	0.236878	0.117472	-0.355779	-0.0484986	0.602783	0.180231	-0.584949	-0.269749	0.0830275	0.240707
SOD2	0.873728	0.98192	0.536025	0.854146	0.892213	0.959945	0.824005	0.929871	0.981536	1.01749	1.30877	0.869069	0.916127	0.838578	0.666608	0.99919	1.00179	1.00172	0.24903
LCAT	2.09539	1.68848	1.89174	2.018	2.12655	2.0441	2.04292	1.84102	1.99696	2.13322	2.15345	1.95516	1.8039	2.10626	1.97697	2.0624	1.79245	2.2713	0.665286
HRG	0.508685	-0.0473101	-0.0603481	0.375525	0.835998	0.717495	1.17991	-0.114942	0.476734	0.53895	1.448	-0.0326922	0.65868	1.4003	1.49409	1.98959	0.800245	0.970943	0.18124
IGLV7-43	3.28075	3.50432	3.35054	3.30062	3.22614	3.18287	3.35252	3.47857	3.33979	3.33641	3.81677	3.62513	3.598	3.47668	3.30081	3.47448	3.55	3.84747	0.0769279
THY1	2.87425	2.60622	2.74292	2.80767	2.87744	2.7952	2.69275	2.52386	2.74988	2.56198	2.82297	2.65822	2.81102	2.6151	2.79883	3.07836	2.85445	2.96458	0.0525912
A1BG	6.1682	6.11188	5.92528	5.85705	6.16189	6.19807	6.14148	6.04494	6.04844	6.21404	6.44821	6.24915	6.42485	6.43826	6.5738	6.25439	6.15692	6.25845	0.0047127
KRT6B	3.0107	2.25434	3.52034	3.08459	1.12047	6.07368	3.14769	2.89756	4.21154	5.23866	1.88859	1.13169	2.59891	2.48224	3.06281	6.14989	1.77636	3.35163	0.958591
KRT1	3.85857	3.14441	4.64947	3.85392	2.28764	7.82531	3.76114	3.9604	4.84741	6.45685	2.14944	1.83842	3.45678	3.39099	3.83174	6.83969	2.81028	4.03224	0.945873
VWF	2.90552	2.94155	2.80859	2.8811	2.84243	2.85591	2.89043	2.87352	2.9789	2.75639	3.03338	2.83656	2.9458	3.04191	2.87277	2.79637	2.81831	3.00668	0.8156
SHBG	1.34425	1.44427	1.03414	1.38088	1.61499	1.5344	1.23127	1.25084	1.51758	1.33705	1.74873	1.27509	1.32998	1.26421	1.59632	1.54913	1.02853	1.73855	0.828444
SEMG1	-1.68151	-2.13314	-1.72457	-2.40994	-2.39045	0.225785	-2.29286	-2.68064	-2.08534	0.674355	-2.82789	-2.11475	-2.2271	-2.34592	-1.48182	-1.29842	-2.02547	0.410059	0.730436
GAPDH	6.02827	6.2761	5.75363	5.93695	6.07979	6.27708	6.17723	5.90335	6.01301	6.45425	6.45522	6.13965	6.24957	6.58715	6.23465	6.06176	5.97539	5.79869	0.0718214
ASL	-0.938963	-0.658949	-0.970361	-0.868254	-0.664465	-0.974576	-0.782756	-0.859792	-0.309589	-0.581062	-1.25099	-1.27285	-0.748153	-0.619147	-0.807707	-0.636393	-1.20394	-1.15873	0.461353
IGKV1-16	2.07258	1.91726	1.93861	1.86806	1.88729	1.92448	2.25965	2.09291	1.69767	1.88266	1.9002	1.98705	2.09415	1.84244	2.11389	1.8185	2.08203	1.66155	0.76881
IGKV3-11	5.78541	5.11951	5.14103	5.39859	5.44884	5.49903	5.68306	5.6164	5.63709	5.51065	5.82137	5.55542	5.97814	5.96096	5.81891	5.89469	5.81774	4.80282	0.331623
HLA-A	0.82064	0.703359	0.679498	0.925325	0.914052	0.619383	0.795165	1.04506	0.637765	0.733778	0.792376	0.364532	0.232164	0.815112	0.460705	0.646706	0.883148	0.659247	0.384319
CAPNS1	0.942708	1.20754	1.0237	1.14682	1.14468	0.965122	0.997428	1.1084	1.04043	1.21607	1.14868	0.864523	1.04768	1.174	0.991814	1.51341	1.27906	1.53359	0.0164548
AMY2A	3.17884	3.27788	2.99826	3.04696	3.09366	3.14671	3.2698	3.00605	3.04931	3.08885	3.40253	3.15765	3.30383	3.20826	3.30966	3.21044	3.07047	3.38652	0.503172
HSPB1	3.55301	3.60397	3.66307	3.43119	3.71979	3.28984	3.6789	3.54796	3.70311	4.00885	3.85741	3.46487	3.37414	3.40584	3.65212	3.56521	3.50327	3.63254	0.295825
CYBB	-0.314967	-0.130798	-0.167937	-0.416709	-0.117423	-0.28281	0.345783	-0.482864	-0.0514612	0.0812008	0.327426	-0.333787	-0.530919	-0.198404	-0.1781	0.193267	-0.12688	0.0204342	0.440694
RPN1	-1.67757	-1.89751	-1.55703	-1.82642	-1.81714	-1.45085	-1.69537	-1.87869	-1.87149	-1.068	-1.55858	-1.85123	-1.77322	-1.71149	-1.21049	-1.3124	-1.43986	-1.4692	0.358695
RPN2	-3.44266	-3.46268	-3.54687	-3.66552	-3.52936	-3.29397	-3.46252	-3.68788	-3.24991	-2.9354	-2.71694	-2.98857	-3.40362	-3.38409	-2.54394	-2.65314	-3.33652	-3.59989	0.158629
GNAI2	1.05877	0.933848	0.46681	0.434198	0.589383	0.595826	0.968501	0.538697	0.733157	0.849045	1.16913	0.882367	0.792578	0.602465	1.06052	0.69971	0.761406	0.875173	0.282991
H2AC4;H2AC11;H2AC7;H2AC25;H2AC6;H2AC12;H2AC14;H2AJ	2.14587	2.94299	3.34807	2.45333	1.63869	1.6007	3.06693	2.22816	1.96467	2.4487	2.3698	1.54586	2.66492	1.8367	1.09432	2.30639	0.928457	2.10711	0.361616
IGF1	-2.58514	-1.63842	-2.57845	-2.43969	-2.77596	-2.46259	-2.34772	-2.42572	-2.41237	-2.43835	-2.5917	-2.61243	-2.64782	-2.30928	-2.7073	-2.57057	-2.47771	-2.71258	0.623409
ATP1A1	-0.585565	-0.818342	-0.877557	-0.688371	-1.05787	-1.1832	-0.305468	-0.551321	-0.686574	-0.671757	-0.522189	-0.807424	-1.44783	-0.797689	-0.813581	-0.889196	-0.652221	-0.451916	0.139289
ATP1B1	0.209529	-0.47774	0.0705743	0.128993	0.121259	-0.540707	0.172232	-0.144854	0.0113631	-1.1658	0.057629	0.409006	-0.272656	-0.119191	0.212939	-0.640447	-0.368795	0.330227	0.981297
CHGB	1.51957	1.75583	1.34058	1.53383	1.13528	1.16132	1.48135	1.59088	1.08896	1.44318	1.54221	0.797901	1.43416	1.12478	1.62979	1.30318	1.29473	1.78788	0.816764
ALDOB	2.118	2.43794	1.98969	2.19476	2.08594	2.11245	2.21554	2.08367	2.29224	2.19831	2.43976	2.03531	2.12207	2.37063	2.10061	2.32322	2.22096	2.22675	0.938013
APP	0.0366291	-0.14705	-0.322293	-0.406206	-0.377867	0.0636591	-0.481225	-0.0886423	-0.0655794	-0.401929	-0.188337	0.116311	-0.351944	0.111359	-0.2635	-0.336799	-0.0626571	0.416946	0.899738
ARG1	0.836828	0.996246	0.90023	0.854429	0.940299	1.34598	0.966354	0.81337	0.760763	2.80884	1.2743	0.640834	0.869583	1.15382	0.775352	1.60032	0.640927	1.19596	0.572
APOD	7.67112	8.06071	7.85026	8.0782	7.82519	7.79492	7.75318	8.10946	7.91864	7.82949	8.00326	7.93195	8.2157	7.99061	8.16978	8.13674	8.3288	7.96028	0.190272
ALDH2	0.534619	0.267259	0.934043	0.383956	0.0867519	0.414886	-0.0651044	0.473466	0.786291	0.534412	0.23693	0.547731	0.349059	0.254994	-0.129195	0.016937	0.89843	0.0898805	0.739131
ITGB2	-0.863793	-0.71322	-0.954813	-0.84654	-1.00386	-0.92572	-0.754315	-0.784947	-0.772128	-0.921678	-0.645968	-1.19133	-0.886656	-0.947133	-0.854433	-0.482543	-0.767034	-0.604845	0.130834
S100A8	3.97013	3.89282	4.58187	3.77026	4.4037	4.3477	4.60325	3.63854	4.34073	4.62841	3.44082	3.64686	3.34016	4.46289	5.08178	3.32714	3.92323	3.74672	0.736204
HMGN1	-0.49098	-0.689602	-0.78966	-0.978084	-1.05322	-1.0131	-0.531276	-0.384418	-0.741877	-0.894744	-0.854526	-0.869324	-0.935534	-0.997818	-0.385915	-0.891805	-0.874215	-0.350128	0.182402
SLC25A5	-1.28005	-1.40925	-1.8402	-1.96805	-1.55934	-2.26735	-0.495889	-1.9391	-1.15557	-1.57887	-1.03736	-1.97676	-1.83198	-2.08205	-1.6766	-0.955965	-1.82532	-1.53812	0.392367
SERPINA5	2.82307	2.91958	2.70409	2.73658	2.76725	2.76706	2.84638	2.81329	2.91488	2.69325	3.2168	2.84963	2.8204	2.70302	2.57844	2.46296	2.53468	2.70935	0.101508
SERPING1	5.81175	6.07269	5.82869	6.12283	6.0425	6.11775	6.22325	6.31542	5.86196	6.07113	6.46358	6.35774	6.21555	6.62751	6.39597	6.08316	6.17767	6.28242	0.0477572
CFI	3.54147	3.51684	3.20989	3.4819	3.51551	3.48	3.48838	3.36192	3.34673	3.50731	3.78613	3.37493	3.54706	3.75264	3.49762	3.5969	3.37922	3.72243	0.510358
F13B	0.685415	0.578613	0.744776	0.476889	0.844797	0.924398	0.737519	0.675964	0.942289	0.270504	0.966873	0.682467	0.557835	0.535232	0.755052	0.435778	0.745495	0.995433	0.924995
ISG15	-2.80953	-2.28956	-1.23028	-2.11596	-2.3872	-2.31054	-2.72557	-2.64166	-3.16224	-3.39245	-2.44734	-2.63937	-2.69621	-3.19922	-3.14996	-2.75222	-3.48239	-2.94092	0.103947
MPO	6.14252	6.12448	5.77979	6.12919	6.30156	6.14012	6.01676	6.26351	6.04347	6.00582	6.40003	6.25673	6.29125	6.26398	5.96704	5.67209	6.21648	6.2755	0.790629
ALPL	-0.93499	-0.953344	-1.11927	-1.00365	-0.920875	-0.941763	-1.0474	-1.09689	-0.77913	-1.38209	-0.905622	-1.08744	-0.781985	-1.15395	-1.00612	-0.794967	-0.997222	-0.786799	0.518837
EIF2S1	-0.465129	0.0618458	-0.418063	-0.27492	-0.0367011	-0.324193	-0.337135	-0.242532	-0.252845	0.0604067	0.146206	-0.264858	-0.254151	-0.560023	-0.368199	0.111216	-0.255092	0.258942	0.155874
HMGN2	1.18899	0.446123	0.986855	1.06423	0.733816	0.336613	1.28264	1.40158	0.243478	0.579425	0.36447	-0.139823	0.389704	0.579702	0.850393	0.277239	0.386854	1.06671	0.429499
IL6	-3.47434	-2.667	-2.94121	-2.96565	-3.74709	-3.66134	-0.982566	-3.41783	-3.01532	-3.56293	-3.25659	-3.53108	-3.35771	-2.97478	-3.53915	-3.37093	-2.91435	-3.21368	0.409035
ICAM1	1.63115	1.4759	1.44793	1.49332	1.64688	1.60289	1.63433	1.37443	1.62466	1.54118	1.59319	1.55257	1.55558	1.62569	1.6998	1.45009	1.48409	1.6344	0.728568
RPLP1	-1.00749	-2.12708	-1.60815	-2.45415	-1.04186	-1.73399	-1.97306	-2.22673	-1.8832	-0.796123	-1.4015	-1.85896	-2.30446	-2.28031	-2.35751	-2.25217	-2.67829	-2.40801	0.067482
RPLP2	2.01384	2.01889	1.80277	1.91773	1.87221	1.99279	1.83967	1.87115	1.78926	2.61934	1.69763	1.99965	1.84956	1.71512	1.98281	1.69369	1.78753	1.96232	0.597318
RPLP0	-0.869071	-0.675701	-0.95082	-0.624652	-0.800432	-0.979201	-0.639483	-0.631586	-0.929882	-0.482188	-0.449234	-0.968824	-1.30598	-1.06102	-1.11518	-0.983347	-1.73982	-1.12762	0.0367938
SCG5	-3.04035	-1.76605	-4.73782	-2.53609	-3.49915	-2.36577	-2.90517	-4.00752	-3.96389	-2.73715	-2.35711	-3.72125	-3.60712	-3.31244	-2.60038	-3.513	-3.35494	-2.648	0.866738
FABP3	2.20672	2.19923	2.1832	2.07535	2.08675	2.07967	2.27133	2.17909	2.07657	2.04467	1.85973	2.27904	2.45197	2.24684	2.33077	2.25732	2.27322	1.93522	0.184765
REG1A	2.84407	2.92107	2.97881	2.80362	2.86935	2.819	2.79445	2.2231	2.93002	2.8127	2.94523	2.46091	2.90208	3.13215	2.69437	2.80393	2.90161	3.073	0.552146
CLEC3B	3.24491	3.47438	3.06154	3.1753	3.39577	3.20984	3.26218	3.36895	3.43184	3.1779	3.44757	3.38948	3.30754	3.09033	3.30767	3.29427	3.31741	3.65064	0.661805
SSB	-0.927065	-0.843534	-0.658062	-1.11948	-0.661101	-1.01	-0.916041	-0.762399	-0.988407	-0.0849156	-0.76577	-1.35776	-1.04286	-1.09782	-1.19581	-1.03218	-0.646442	-0.765513	0.718065
SERPINA7	4.56148	4.61234	4.43807	4.34515	4.56102	4.56974	4.61854	4.47172	4.57145	4.68601	4.86302	4.36541	4.48885	4.95302	4.57166	4.81709	4.04156	4.45941	0.806379
SERPIND1	1.75969	2.11631	1.74288	1.70723	1.92687	2.06751	2.03836	1.94166	1.63605	1.84739	2.47239	1.89152	2.14859	1.81785	1.83593	1.95514	1.73877	2.0744	0.891474
ITGB1	-0.703736	-0.325824	-0.523828	-0.721797	-0.85781	-0.5431	-0.67315	-0.062575	-0.571881	-0.64218	-0.49483	-0.767801	-0.666193	-1.05787	-0.683442	-0.621991	-0.581278	-0.28295	0.32179
PRKCB	-4.26106	-4.11906	-4.01598	-4.02249	-4.01263	-4.0001	-3.02906	-4.22106	-3.98254	-4.15177	-4.44872	-4.24589	-4.0449	-4.03208	-3.98149	-3.77961	-4.15188	-3.96292	0.356879
KRT18	0.967687	1.10833	0.947366	1.09589	0.885775	1.20288	1.23259	1.14311	1.01788	1.06272	1.42611	0.714623	0.92629	0.9353	0.961312	1.33115	0.989972	1.13045	0.743181
KRT8	2.9856	2.9482	2.8912	2.93427	2.96464	2.91572	3.23088	3.14514	3.02882	2.7204	3.11723	2.99244	2.66829	3.05988	2.63057	2.92573	2.75088	2.82958	0.123824
CALB1	0.932467	0.689892	0.491271	0.829783	0.632055	0.626425	0.426322	1.13188	1.15231	0.998105	0.760625	0.484593	0.57242	0.346122	0.253713	0.683257	0.299583	0.677711	0.267117
HPN	-1.50357	-1.1949	-1.39994	-1.71877	-1.50799	-1.51709	-1.14464	-1.08554	-1.40788	-1.65664	-0.846043	-1.46073	-1.41138	-1.50376	-1.13498	-1.7721	-1.45628	-1.66953	0.254119
COL5A2	-5.95968	-6.60618	-6.30042	-7.08845	-6.80013	-6.12659	-5.58281	-6.20555	-6.25926	-6.64128	-5.45591	-5.38139	-6.09394	-6.41094	-6.02626	-5.74399	-6.60305	-3.70154	0.405843
UROD	0.788088	1.01174	0.794067	0.922666	0.917131	0.879041	0.708507	0.846995	0.904205	0.544954	0.914617	0.817013	0.835842	0.873362	0.792932	0.982181	1.21106	0.886998	0.226394
BCHE	1.33124	1.49815	1.27166	1.27496	1.32838	1.34393	1.16374	1.18244	1.31612	1.33483	1.46093	1.31186	1.28149	1.47242	1.25198	1.4603	1.14136	1.44719	0.611522
GLA	1.27657	1.3837	1.33138	1.2615	1.2044	1.21388	1.46526	1.21802	1.40323	1.14503	1.6392	1.61689	1.07442	1.73026	1.48257	1.03083	1.48082	1.5903	0.823182
IGKV2-30	0.612069	-0.816062	0.103368	-0.277709	0.308626	0.244244	0.606793	0.341865	-0.200958	0.153292	-0.0613606	0.140826	0.419356	0.566662	0.432879	1.16557	0.0554711	0.322328	0.578749
IGKV4-1	5.87541	5.59089	5.59578	5.7732	5.70046	5.74692	5.77253	5.66903	5.67071	5.56149	6.12822	5.85992	5.7801	5.46712	5.91027	5.73886	5.76351	5.93096	0.820505
IGHV4-34	2.92658	3.04599	2.75836	2.94426	2.85027	3.07421	2.90377	3.21815	3.09766	3.0606	3.44225	2.8602	3.35259	3.10217	3.1808	3.07606	3.28646	2.74054	0.505612
GSN	5.73663	6.26278	5.65408	5.86019	5.99695	5.92042	5.85576	6.00007	5.90393	5.94343	6.25945	5.86136	6.17677	6.22662	6.1722	6.07767	6.14155	6.05961	0.250323
PTMA	1.64775	1.65817	1.83013	1.8419	1.3537	1.27639	1.4295	1.75227	1.36404	1.35864	1.54046	1.59576	2.2306	1.25147	2.09966	1.41643	2.1734	1.94072	0.501287
ATP5F1B	-0.0115946	0.2917	-0.29789	-0.292521	-0.348258	-0.268248	0.404147	-0.351324	0.0862605	0.651127	0.538815	-0.268232	-0.490553	-0.166562	-0.0849428	0.238593	-0.154076	-0.222451	0.270643
C2	1.11467	1.21085	1.08078	1.08266	1.13472	1.13649	1.07985	0.953868	1.27367	1.09477	1.40943	0.977245	1.13038	1.27763	1.03345	1.1849	1.14558	1.24635	0.963009
S100A9	4.17158	4.63919	4.31247	4.03862	4.39042	4.58333	4.67443	4.29928	4.07771	4.80478	4.38524	4.01899	4.3461	5.10628	4.98918	3.79369	4.3125	4.33834	0.306923
S100A6	2.67648	3.16619	3.43204	3.28861	2.90672	2.74667	3.3074	3.53849	2.8766	3.6325	3.26429	3.19489	3.57976	4.49977	4.43144	3.34897	3.48704	2.89391	0.0177747
APOA4	2.86082	2.87003	2.89276	2.94432	2.95135	2.94003	2.86358	3.02529	2.98151	2.69087	2.96197	2.86528	3.00001	2.80635	2.7827	2.75013	2.89472	2.79236	0.32447
EIF4E	-0.772554	-0.715169	-0.756067	-0.867768	-0.884179	-0.677525	-1.19342	-1.03627	-0.839547	-0.962715	-0.725233	-0.99646	-0.882378	-0.432026	-0.802943	-0.273009	-0.895054	-1.10315	0.57183
ENO1	5.02315	4.89915	4.97724	5.0183	4.98943	4.95772	4.96758	5.03449	5.05644	4.88814	5.09393	5.02909	4.9053	4.88164	4.92236	4.90533	4.89293	4.96394	0.159187
FCER2	-1.10819	-1.26861	-1.55452	-1.10275	-1.4414	-0.804372	-0.969155	-0.983925	-1.083	-1.48396	-1.12015	-1.20859	-0.833812	-1.91781	-1.82578	-1.17612	-1.75052	-1.10133	0.535205
PYGL	0.251656	0.309596	-0.111853	0.163617	0.229644	0.143997	0.416945	0.288591	0.0209499	0.18107	0.531824	0.358042	0.108309	0.244912	0.246502	0.178945	0.415554	0.29803	0.601938
GPI	1.949	2.10125	1.93476	1.79719	1.99931	2.01593	2.07057	2.10186	2.07316	2.07306	2.24199	1.81222	1.68941	1.79878	1.58287	1.53657	1.23922	1.68292	0.00221216
NPM1	-1.35194	-1.46345	-1.26593	-1.37556	-1.11744	-1.27745	-1.64239	-1.08474	-1.84806	-0.824354	-1.19463	-2.34875	-1.23652	-0.982747	-1.05458	-0.897201	-1.88692	-1.14944	0.849283
TPM3	3.39682	3.75778	3.29358	3.32682	3.50058	3.48096	3.71058	3.54156	3.67791	3.64305	3.95109	3.71283	3.76011	3.74947	4.26849	3.80485	3.69822	3.40455	0.0869275
ITGAV	-3.16022	-3.14631	-2.99124	-3.15002	-2.97665	-3.08245	-2.96788	-3.44434	-2.80965	-3.20273	-2.97043	-2.13559	-3.20453	-3.55962	-3.30716	-3.41934	-2.2311	-3.54403	0.683952
HEXA	2.85212	2.98234	2.54681	2.74327	2.65771	2.74817	2.86231	2.73443	2.8742	2.82452	2.93028	2.81038	2.81931	2.86994	2.97625	2.72766	2.81098	3.1047	0.639418
KLK1	1.41568	1.07112	1.36961	1.1417	1.5032	1.23407	1.34871	0.7871	0.997878	1.16606	1.86727	1.19371	1.20604	2.20564	1.24404	1.61955	0.866523	1.43599	0.673268
H2BC11;H2BC17;H2BC3;H2BC21	-1.01743	0.174561	-1.44594	-1.31326	-1.60252	-0.991587	-1.20158	0.368798	-1.46368	-1.13485	-0.491876	0.323926	-0.688611	-1.31023	-1.14469	-0.329173	-0.266281	-1.41474	0.710968
SERPINE2	-0.502358	0.542083	-0.749759	-0.63636	-1.13175	0.0897187	-0.772831	0.144785	-0.457673	-0.485765	1.70234	1.39969	0.822018	-0.509107	3.32666	-0.0600603	0.635351	0.264199	0.276837
EPHX1	-2.26168	-2.23902	-2.27724	-2.2684	-2.31449	-2.25869	-2.31538	-2.29363	-2.28375	-2.06756	-2.27856	-2.2343	-2.26761	-2.30804	-2.2775	-2.28968	-2.2816	-2.18883	0.286319
DBI	0.590413	0.584598	0.847417	0.62171	0.689829	0.513913	0.847596	0.444115	0.744356	1.57638	0.78612	0.388189	0.370544	1.0811	0.607736	0.424839	0.516216	0.225772	0.528732
FABP1	2.51299	3.17284	2.65975	2.74018	2.69648	2.73882	2.36785	3.09597	2.87246	2.70461	2.99189	2.51469	3.04521	2.57916	2.98739	2.79639	2.739	2.94787	0.980157
LDHB	4.19511	4.51829	4.24595	4.09229	4.3439	4.11392	4.2192	4.30944	4.21055	4.20162	4.71411	4.36693	4.08531	4.31234	4.4197	4.02966	4.00487	4.36736	0.45305
GPX1	0.850753	1.28349	0.749147	0.687298	0.892041	0.693804	0.807888	0.920092	0.878341	0.9479	1.17016	0.90591	0.945018	1.26742	0.890645	0.398163	0.659207	0.769412	0.0907219
THBD	0.324324	0.0876567	-0.20838	-0.162302	-0.152085	0.138891	0.222574	0.186596	-0.0121947	-0.0130227	-0.331141	-0.0351529	-0.0809282	-0.242135	-0.0457654	-0.033843	0.321271	-0.224643	0.5391
PGK2	-1.76337	-1.8581	-2.28218	-1.17188	-1.23329	-1.40635	-1.59461	-2.43676	-2.23282	-1.29706	-1.46699	-2.09837	-2.42028	-0.787369	-0.187295	-1.1484	0.0813359	-1.99651	0.349846
PROS1	1.04339	0.931508	0.674225	1.0312	1.0675	1.09384	0.905153	0.839204	0.991058	0.939368	1.20434	0.725427	0.99468	0.989391	1.43383	1.07667	0.845744	1.0523	0.499242
P4HB	1.56065	1.515	1.49603	1.50757	1.5635	1.50053	1.65191	1.55005	1.56086	1.52465	1.67807	1.34136	1.41781	1.46575	1.47541	1.68243	1.50815	1.67827	0.279984
KLK3	0.619541	1.30456	0.805638	3.39242	-0.0229244	4.03912	0.415057	0.726959	3.68485	0.272041	1.22087	1.62251	4.33704	1.31712	0.160552	0.875104	1.11599	1.33026	0.769359
H1-0	0.253625	0.945903	0.372301	0.650293	0.781672	0.597562	0.525638	0.989863	0.239575	0.779963	0.947614	0.750718	1.14729	1.00517	0.871751	1.43933	1.49352	1.52736	0.00259008
ASGR1	-0.826464	-0.618464	-0.542745	-0.706045	-0.610473	-0.646024	-0.900957	-0.767845	-0.579744	-1.03869	-0.578501	-0.91667	-0.529327	-0.77943	-0.472842	-0.643924	-0.846395	-0.501032	0.53199
ASGR2	0.100094	-0.330116	-0.0540631	-0.0724045	0.0422762	0.0356463	-0.1925	-0.44035	-0.471159	-0.165294	0.0478686	-0.922339	-0.361592	-0.172503	-0.512257	0.0275712	-0.599238	0.280151	0.54263
ACYP1	0.707178	0.697241	0.70369	0.642213	0.442677	0.638064	0.470692	0.327627	0.761355	0.552973	0.589139	0.494193	0.691454	0.775824	0.456624	0.539096	0.785106	0.691034	0.507865
CSF1R	1.14655	1.47575	1.18496	1.0223	1.26527	1.09643	1.11305	0.890737	1.24251	1.39889	1.50398	0.862335	1.2092	1.20314	0.966087	0.905884	1.4089	1.24765	0.863436
CTSD	2.96005	3.20627	2.90086	2.86821	3.15438	3.09801	3.18812	3.24536	3.20473	3.69955	3.47295	3.31594	3.12179	4.08522	3.39606	3.36237	3.41389	3.24564	0.0839292
ANXA2	1.09142	1.11065	0.742413	0.958273	0.891738	1.28707	1.24285	0.945675	1.19039	2.42375	1.17324	0.823224	0.886385	1.18155	1.1929	1.49132	1.1797	1.28815	0.623578
C8A	2.11669	2.32083	2.03837	2.09984	2.19666	2.24134	2.10588	2.37448	2.28443	2.40421	2.38457	1.99519	2.19465	2.41995	2.46252	2.30275	2.35287	2.37599	0.455453
C8B	0.49517	0.59193	0.4194	0.357179	0.537735	0.365906	0.443119	0.403378	0.514471	0.596468	0.885175	0.223607	0.319507	0.335319	0.271398	0.58085	0.302732	0.687546	0.52203
GP1BA	2.1861	2.44645	1.995	2.4029	2.08686	2.14832	2.41373	2.24033	2.18841	1.93314	2.08571	2.13803	2.13839	2.11202	2.20026	1.82807	2.50268	2.46383	0.766943
C8G	1.69652	1.82317	1.34994	1.51064	1.80413	1.69902	1.7927	1.59131	1.68196	1.6162	1.9474	1.6759	1.65048	1.7845	1.57411	1.642	1.60028	1.8939	0.957558
CAPN1	2.00294	1.9714	1.70453	1.86366	1.84542	1.78135	2.10494	1.9312	1.80664	1.99467	2.34769	2.05703	2.12786	2.19167	1.98652	2.11619	2.06897	2.22002	0.0504959
TUBB	1.25627	1.7282	0.932208	1.32987	0.88303	1.11114	1.29426	1.07781	1.02498	1.34883	1.67515	1.05654	1.17031	0.916815	1.0956	0.967708	0.945912	1.53583	0.730285
CA3	1.26473	1.21472	0.7733	0.889069	1.337	1.12567	1.14827	0.764909	1.09659	1.28801	1.66752	0.986506	1.16861	1.466	0.911791	1.08194	0.982486	0.961075	0.646873
IVL	0.10092	0.0667463	0.182141	0.126856	0.247534	0.127477	0.106765	0.151676	0.287416	0.371938	0.211502	0.0895941	0.0328818	0.106293	0.256757	0.130623	0.038246	0.42919	0.889472
PRSS2	0.420778	-0.517534	0.363804	0.00943981	0.021778	-0.372895	-0.0132476	0.110495	0.142623	-0.00101411	-0.681173	-0.327569	0.39093	-0.176755	0.866243	-0.334597	0.857271	0.246476	0.428391
DCN	-2.06839	-0.803456	-1.20998	-0.726343	-0.830742	-1.42096	-1.56193	-1.51285	-1.16699	-1.79111	-1.90462	-2.33968	-0.561774	-1.05021	0.0370428	-1.02874	-2.01829	-1.96763	0.0279855
PSAP	5.01859	5.44987	5.55117	5.14304	5.15375	5.37446	5.21183	5.43073	5.22184	5.26057	5.19626	5.11638	5.04745	5.88616	5.32289	5.24455	5.09302	5.22652	0.773672
HEXB	2.91095	2.72446	2.77611	2.5972	2.79415	2.8461	2.88747	2.81765	2.79283	2.84746	2.84435	3.00202	2.87615	3.07112	2.82497	2.87	2.89834	2.82593	0.299806
CTSL	-0.139781	-0.700486	-0.271356	-0.0437788	-0.0837987	-0.815319	-0.33531	0.201494	-0.334204	-0.487002	0.378118	0.226288	-0.809462	-0.222106	-0.279178	-0.216596	-0.845064	-0.372432	0.534489
PFN1	5.98609	6.2401	6.10142	6.10229	6.19599	6.20658	6.17041	6.14181	6.03032	6.33488	6.28947	6.07425	6.04454	6.88649	6.32673	6.35168	6.16997	6.31393	0.431355
BPGM	3.34102	3.48771	3.13274	3.06826	3.15683	3.15839	3.46844	3.1692	3.25674	3.26474	3.72552	3.37318	3.21963	2.98554	3.38146	3.42261	3.43937	3.31965	0.219311
APRT	2.01521	2.25369	2.21303	1.92409	1.94152	2.04055	2.03455	2.37808	2.40212	2.1426	2.29337	1.93806	1.98204	2.09333	2.02571	1.69036	1.77319	1.99842	0.0301249
EPRS1	-2.90922	-2.68176	-2.29918	-2.55023	-3.04118	-3.31822	-2.11152	-2.95554	-2.02571	-2.30476	-2.22267	-2.27765	-2.21462	-2.193	-2.0787	-2.02819	-2.22242	-2.08192	0.0307343
CTSB	3.98361	4.01606	4.05755	4.1289	4.22177	4.39917	4.06025	3.96617	4.05819	4.30093	4.34232	4.04378	4.12082	4.51062	4.41623	4.58775	4.05317	4.29698	0.118395
HSP90AA1	1.56686	1.75547	1.54585	1.38019	1.3934	1.43348	1.65828	1.61683	1.53439	1.50491	1.76663	1.4361	1.47269	1.43824	1.49824	1.48192	1.4439	1.56447	0.0927121
HNRNPC	1.7621	1.00937	1.46951	1.54668	1.59465	1.43497	1.63908	1.8166	1.32169	1.33096	1.76906	1.55316	1.49114	1.48338	1.75989	0.991318	1.54338	1.45268	0.753288
UMOD	3.88309	3.95563	3.526	3.82125	3.74532	3.84597	4.82005	3.71382	3.78173	4.29097	4.7408	3.87501	3.82846	4.2909	4.11327	5.10525	4.45776	4.27888	0.147615
UQCRH	-0.53021	-1.25944	-1.17043	-1.17329	-0.783239	-1.64713	-1.08604	-1.10655	-0.93832	0.248183	-0.338067	-1.81938	-0.723874	0.191516	-1.35127	-0.250165	-0.818112	-0.61948	0.707629
LAMB1	-1.03782	-1.02876	-1.38749	-1.15903	-0.921153	-1.46155	-1.03114	-1.30256	-1.07345	-1.02445	-1.57641	-1.20071	-1.28269	-0.941985	-1.42312	-1.29895	-0.851865	-0.914839	0.857878
YES1	-1.39031	-1.39875	-1.42604	-1.65842	-1.85117	-1.7079	-1.0957	-1.85115	-1.10635	-1.17554	-1.57727	-2.30431	-2.16826	-0.98486	-1.75572	-0.946383	-1.64929	-0.790418	0.50271
LYN	-1.6705	-1.43765	-1.96133	-1.58272	-0.74202	-1.57378	-1.88464	-1.96342	-2.05921	-1.67612	-1.4884	-1.76877	-2.00485	-1.95619	-1.9311	-1.31782	-1.97962	-2.09662	0.121725
FH	-0.424463	-0.199886	-0.478943	-0.323386	-0.564245	-0.457394	-0.169484	-0.511407	-0.59157	-0.501969	-0.200916	-0.540159	-0.616312	-0.389581	-0.633816	-0.827248	-1.05515	-0.559312	0.100017
SFTPB	-3.35888	-3.51061	-2.47585	-3.47778	-2.97088	-3.62782	-3.46395	-3.47361	-3.55062	-2.10269	-2.02342	-3.26781	-3.57558	-2.88572	-2.84149	-2.38525	-3.42642	-2.9514	0.200508
THBS1	1.46859	1.44713	1.29321	1.38985	1.3477	1.32512	1.14119	1.4952	1.31873	1.31574	1.45467	1.17769	1.28816	1.26532	1.11422	1.44147	1.33139	1.63282	0.304082
RNASE1	3.288	4.55103	3.2648	3.01415	3.94765	3.47581	3.67822	4.43137	3.62213	4.4006	4.70819	4.31439	4.56907	4.12386	4.52182	4.11022	4.10514	4.82014	0.0893169
MSMB	-1.90081	-2.01216	-2.62784	-2.64402	-2.13597	-2.51104	-1.97307	-2.14278	-2.402	-3.07354	-2.17831	-2.80334	-3.58377	-2.79026	-2.48658	-2.63873	-3.34662	-1.81717	0.363967
COL1A2	-0.205221	0.289848	-0.361799	0.0797009	-0.67159	-0.00463602	0.12022	-0.0682658	-0.684454	-0.159758	-0.548143	0.1535	-0.1977	-0.240046	-0.157847	-0.0641888	-0.105317	-0.0710158	0.989143
ANXA6	0.851919	0.947152	0.568202	0.511925	0.729985	0.680457	1.24162	0.728722	0.862862	0.801756	1.25931	0.458581	0.725616	0.786226	0.584475	1.184	0.925747	1.09891	0.277751
NGFR	1.32179	1.36396	1.02474	1.30515	1.13653	1.24379	1.31735	1.58812	1.5948	1.16285	1.40013	1.37643	1.30182	0.811949	1.23359	1.08911	1.19036	1.53528	0.292758
CD55	2.26051	2.62305	3.08036	2.1953	2.36039	2.88496	2.56398	2.70666	3.17595	2.09736	2.97883	2.66218	2.5144	2.63602	3.09747	2.14176	2.8712	2.78481	0.897419
ABCB1	-1.47056	-0.68157	-1.88713	-0.568126	-0.881771	-0.34232	-2.1648	-0.39134	-1.60815	-0.482072	-0.736312	-0.873823	-2.16629	-1.19972	-0.777204	-1.59957	-1.40579	-1.03356	0.321564
SERPINA6	5.12113	4.92685	4.84876	4.77892	5.09461	5.05193	5.04787	5.02267	4.91921	4.7613	5.37435	4.84164	4.75489	5.12107	5.00876	4.91171	4.67099	4.92767	0.910434
SLC3A2	1.54179	1.80929	1.38109	1.42371	1.52114	1.52514	1.57744	1.53814	1.61938	1.61468	1.81241	1.30546	1.42483	1.61596	1.27148	1.4495	1.48913	1.77436	0.860542
GUSB	3.4243	3.33343	3.03573	3.26085	3.18839	3.22657	3.33942	3.17801	3.31013	3.18242	3.29467	3.16071	3.37384	3.4941	3.09073	3.41915	3.36549	3.22398	0.836512
HSP90AB1	2.15541	2.4	2.21484	2.15652	2.09832	2.18211	2.34901	2.25866	2.19119	2.40451	2.48456	2.0941	2.1043	1.99166	2.40058	2.24417	2.13683	2.32283	0.644862
SRPRA	-2.81318	-3.05199	-3.14328	-2.78377	-2.84013	-2.764	-1.65368	-3.12588	-2.83459	-2.96473	-2.62416	-3.1074	-2.87835	-3.10484	-2.94691	-2.30214	-2.41923	-2.8635	0.454955
ASNS	-0.0418956	0.568598	0.741137	0.873936	0.727524	0.180245	0.572723	0.378908	0.585789	0.390221	0.353614	0.35925	0.638947	1.05676	0.123058	0.67635	1.00666	1.29077	0.293339
ELANE	2.49423	2.83537	2.33979	2.8927	3.11657	2.95056	2.32957	3.1838	2.58892	2.64675	2.9565	2.70882	2.97542	2.68658	2.50856	2.52564	2.80399	2.94294	0.523327
MMP2	-1.08953	-0.602706	-1.16387	-1.1465	-1.54723	-1.39214	-1.19981	-1.16978	-1.31483	-0.939312	-1.20991	-0.99827	-1.46728	-1.02627	-1.41945	-1.62416	-1.32622	-1.02275	0.232674
MMP3	-0.376267	0.31183	-2.52629	-2.1474	-0.472941	1.21585	0.750202	-0.785935	-0.881487	-0.525247	-1.54174	-0.404519	-0.517389	1.01833	-1.62797	-1.60925	-1.44461	0.218509	0.97462
GSTA1	0.306925	0.620006	0.729729	0.395064	0.172409	0.560361	0.650076	0.372213	0.525134	0.723045	0.768985	0.221819	0.725658	0.317364	0.0362674	0.523589	0.395763	0.551741	0.808487
SOD3	-0.0563726	0.600567	-0.238276	0.0404472	0.287347	-0.106728	0.0370357	-0.0342721	-0.00362156	0.242052	0.555417	0.0535628	0.573936	0.529223	0.409575	0.28848	0.222074	0.41101	0.150613
CTSG	1.4011	1.69229	1.04354	1.45871	1.59425	1.50298	1.50791	1.6892	1.43008	1.53778	2.03578	1.79691	1.90444	2.03926	2.01531	1.80198	2.38854	2.38018	0.00660917
HMBS	-0.812029	-1.21907	-0.610478	-0.904946	-1.04874	-0.99071	-0.656458	-0.787257	-0.813603	-0.810404	-0.249735	-0.635715	-1.2606	-0.878169	-0.711056	-1.01894	-0.624895	-0.767246	0.308714
MME	0.451603	0.376212	0.351419	0.215003	0.222007	0.25349	0.343534	0.215356	0.496097	0.052042	0.481531	0.268148	0.0799427	0.776565	0.200153	0.402432	0.123632	0.463349	0.918454
MGP	-4.77825	-3.58906	-4.59078	-4.22644	-4.84208	-3.71293	-4.10599	-4.95621	-4.14466	-4.71868	-2.96094	-4.35455	-5.18271	-3.13604	-1.35182	-4.72277	-4.67327	-4.78359	0.534344
LPA	0.541692	0.418877	0.639709	0.477107	0.617901	0.70722	0.512215	0.797529	0.58056	-0.0344218	0.687528	0.56117	0.544288	0.607808	0.177978	0.138919	0.549303	0.939435	0.88172
PDHA1	-5.58344	-6.81698	-6.56393	-4.88861	-6.28242	-6.94478	-2.46823	-6.17235	-6.46161	-6.27423	-4.95518	-6.64267	-6.59217	-6.13649	-5.26701	-1.48163	-5.92225	-5.9567	0.661089
PLEK	-1.06874	-1.27748	-0.65486	-1.28442	-0.359433	-0.515757	-0.744565	-0.656168	-0.572199	-0.711373	-0.779242	-0.978026	-1.21082	-1.20913	-1.08692	-0.625421	-0.939585	-0.768917	0.22188
CD14	4.63953	4.84944	4.49966	4.5922	4.88995	4.74916	4.57627	4.63893	4.60257	4.68464	5.17298	4.89782	4.63536	5.23909	4.84772	4.82792	4.77481	4.6657	0.311604
COL4A2	0.826563	1.08593	0.885945	0.986521	0.755012	0.918923	0.636356	1.1366	0.663396	0.951953	1.01412	0.58303	0.862249	0.941624	0.96118	0.94676	0.733659	1.10272	0.950987
CYC1	-2.0673	-2.19956	-1.81891	-2.1095	-1.87215	-2.0513	-2.16246	-2.12014	-1.97176	-1.76503	-1.19768	-1.9013	-1.79603	-2.04543	-2.0398	-0.957735	-1.23209	-1.90102	0.0435732
PTPRC	-0.893513	-0.413904	-0.658063	-0.767335	-0.406725	-0.833925	-0.64262	-0.432635	-0.377442	-0.738384	-0.318586	-0.526531	-0.735524	-0.684567	-0.584998	-0.56416	-0.497383	-0.392443	0.561475
MELTF	-0.164021	0.0933983	-0.163573	-0.240917	-0.517385	-0.353705	-0.189178	-0.277874	-0.172938	-0.360399	-0.199003	-0.388453	-0.259819	-0.231001	-0.184038	-0.066267	-0.278416	-0.176044	0.0632892
CFH	5.24492	5.46099	5.13457	5.16927	5.35487	5.35423	5.21693	5.32289	5.38199	5.26606	5.59484	5.31933	5.35819	5.53082	5.6155	5.054	5.30885	5.6655	0.657684
HCK	-1.84763	-1.0707	-2.09826	-2.01996	-2.5226	-2.54026	-1.77983	-1.11293	-1.84469	-2.29236	-2.32241	-2.41268	-2.62649	-2.73252	-2.14903	-2.02378	-2.15833	-2.14141	0.0201496
FCGR3A	2.73475	2.3835	2.4412	2.66629	2.72821	2.65873	2.44219	2.15454	2.64408	2.10243	3.17575	3.18314	2.78463	2.56024	2.96158	2.7463	3.01574	3.19912	0.308619
VIM	0.91733	0.998207	1.02963	1.13388	0.976811	0.956633	1.28901	1.1538	1.10885	1.21513	1.32969	0.752673	0.777455	1.27287	0.916246	1.30653	0.727014	0.837983	0.777998
SERPINF2	4.14367	4.38498	3.90161	4.12562	4.35182	4.12476	4.23613	4.1286	4.10808	4.08389	4.40233	4.09883	4.20065	4.2367	4.20972	4.13857	4.12978	4.17078	0.975021
RPS17	-2.56787	-2.49476	-2.56477	-2.41611	-1.87656	-2.56608	-2.57212	-2.56228	-2.45434	-1.71402	-2.48151	-2.52305	-2.69849	-2.5708	-2.51824	-2.26907	-2.55887	-2.15146	0.428184
F7	-0.594658	-0.777753	-1.40144	-1.30833	-1.0511	-1.01622	-0.820717	-0.860003	-1.26137	-0.480638	-1.12	-0.439483	-1.1355	-1.25068	-1.30785	-1.13918	-0.678486	-0.829931	0.285606
KRT19	1.72429	2.06755	1.86047	1.87514	1.83518	2.10772	2.23397	1.96314	1.82149	1.99604	2.09838	1.78326	1.86732	1.71066	1.812	2.05752	1.91113	1.84481	0.6503
KRT7	1.81045	2.01939	1.77295	1.8852	1.74173	1.98215	2.16076	1.86078	1.76962	1.7552	2.27551	1.63467	1.79126	1.62104	1.88788	1.9796	1.85642	1.84034	0.929391
GNAI3	-0.675358	-0.633647	-1.49485	-1.16079	-0.383977	-0.758454	-0.560191	-0.824496	-1.0353	-0.476672	-0.51619	-1.05473	-0.730974	-0.616357	-0.499773	-0.247596	-0.546918	-0.936213	0.794949
ANXA5	0.472689	0.365324	0.340781	0.336687	0.3924	-0.150077	0.663836	-0.135687	0.323563	1.07836	0.903575	0.0325877	-0.00937792	0.50575	0.454997	1.02444	0.469146	0.500195	0.465573
KRT16	-2.27562	-2.77278	-0.986025	-1.67548	0.0936406	3.66628	-1.62885	-1.62116	-1.20281	0.114266	-2.42039	-2.91705	-0.938688	-2.22617	-2.04045	-0.52101	-0.945083	-1.20508	0.244662
IGFBP1	-2.33383	-2.08459	-3.22595	-2.9886	-3.2512	-2.84285	-1.91732	-2.6353	-3.34882	-2.72568	-1.89708	-3.13785	-2.37528	-3.30664	-1.61435	-2.92767	-3.21893	-3.39027	0.59448
RPSA	0.681218	0.992096	0.257271	0.845525	0.69124	0.697464	0.433809	0.631938	0.164842	0.939723	1.10747	0.633841	0.911541	0.900624	0.714508	0.0210692	0.138326	0.18545	0.00628351
IL6R	-2.67658	-2.95777	-2.58968	-2.74126	-2.29084	-2.2962	-2.68162	-2.34803	-2.56106	-2.04029	-2.94405	-2.66478	-2.31832	-2.52229	-2.08687	-2.32369	-2.42822	-0.952187	0.295868
CD63	-2.0389	-1.94261	-1.9761	-1.73014	-1.88772	-1.43359	-1.64341	-1.89114	-1.99535	-1.65017	-1.68816	-2.07173	-1.99126	-1.0215	-1.06641	-1.94581	-2.03401	-1.55292	0.221065
SNRPA	-1.66144	-0.398332	-1.086	-0.913088	-1.29341	-1.30481	-0.798511	-0.46693	-1.65576	-1.13107	-0.583282	-0.951324	-0.522607	-1.55962	-0.75955	-0.74509	-0.855178	-0.995453	0.961383
ENO2	4.28788	4.06404	3.48417	3.76682	4.20449	4.49788	4.24291	3.30943	3.68247	4.11581	4.51096	3.98421	4.04749	4.29086	4.27715	4.41017	3.48272	4.09957	0.630808
HBQ1	0.610574	0.40988	0.443619	0.213547	0.315124	0.418088	0.846042	0.311893	0.423065	0.423936	1.17827	0.36176	0.486529	0.628732	0.397974	0.534622	0.448166	0.719635	0.658063
ACAA1	-1.54303	-1.31468	-2.02796	-2.08916	-1.53756	-1.7459	-1.51346	-1.74093	-1.85834	-1.66081	-1.19115	-1.40332	-1.76078	-1.4903	-2.60527	-0.998415	-1.19324	-1.82783	0.385661
SLC10A3	-1.65098	-2.79411	-1.39031	-3.58643	-3.59512	-4.14764	-3.46125	-3.72809	-3.44542	-3.51378	-3.25037	-2.36751	-3.12441	-3.43915	-3.42501	-3.50398	-3.76408	-3.55887	0.00231275
DBH	-0.878863	-0.783373	-1.05861	-1.21852	-0.961169	-1.60445	-0.625646	-0.820541	-1.11745	-1.03753	-1.19185	-1.29335	-0.932762	-0.887375	-1.1255	-1.27863	-0.664307	-0.919467	0.270208
GSTA2	0.449399	0.328153	0.315413	0.148338	0.224719	1.53553	0.212749	0.325186	0.421418	0.273049	0.640794	0.160287	0.529509	0.329736	0.162816	0.608007	0.112381	0.661483	0.893827
GSTP1	3.6829	3.84854	3.40405	3.54314	3.63658	3.75631	3.72052	3.08755	3.55331	3.85171	3.99431	3.60597	3.62524	4.14678	3.85342	3.85096	3.32117	3.97943	0.456374
SNRPC	-3.09287	-3.19567	-2.898	-2.95015	-3.77504	-3.274	-3.35956	-3.68794	-2.90278	-2.67444	-3.2654	-3.28213	-2.85073	-0.928191	-3.70378	-3.03533	-2.91429	-3.43286	0.665613
MMP7	2.57138	2.3046	2.49071	2.33059	2.49305	2.31743	2.5569	2.65867	2.8184	2.28039	2.61631	2.55327	2.49823	2.44248	2.47481	2.23687	2.22378	2.41111	0.0397089
CD48	-0.288966	-0.124345	0.148125	-0.369025	-0.323195	-0.0622209	0.110847	0.57352	-0.331144	-0.125583	0.0574372	-0.358312	0.131912	0.584305	0.386808	0.00102138	0.813617	-0.195916	0.261606
VIL1	-1.45174	-1.17541	-0.991198	-0.939197	-0.934278	-1.27524	-1.32598	-1.31456	-0.802163	-1.0335	-1.30662	-0.102723	-1.50848	-0.762706	-0.621847	-0.873772	-0.59982	-1.40636	0.858353
LGALS1	0.570987	0.754282	0.536042	0.540792	0.618012	0.572223	0.602706	0.356102	0.597628	0.395912	0.824591	0.378359	0.431492	0.524831	0.430268	0.474328	0.546071	0.779335	0.781692
QDPR	0.267796	0.405724	0.272952	0.0598694	0.272135	-0.0880605	0.32587	0.455294	0.272035	-0.660009	0.117243	0.173097	0.0181451	0.232589	0.0962077	0.405913	0.678398	0.235887	0.0972996
HMGB1	0.943621	1.18899	1.39722	1.16357	1.35667	1.24472	0.948709	1.75163	0.89676	1.05675	1.29856	1.20028	1.02772	1.10129	1.66174	1.25265	1.51589	1.37301	0.938618
RBP1	-0.0812506	-0.570662	0.0211386	0.0566575	-0.0514564	-0.0820194	0.20193	-0.333101	-0.496423	-0.135789	0.182622	-0.215718	-0.410505	-0.209857	-0.0881528	-0.11155	-1.09411	0.114449	0.848111
FBP1	2.35787	2.33389	1.94199	2.19195	2.26504	2.13409	2.20605	1.97437	2.29793	2.1766	2.53612	2.03916	1.97667	2.43108	2.14135	2.26902	2.04571	2.58534	0.970077
SPARC	-1.78671	-1.58925	-1.67683	-2.63931	-1.6972	-1.8708	-1.54395	-1.87784	-2.05592	-1.9288	-1.81351	-2.04185	-1.66778	-1.67689	-1.5851	-1.80863	-1.75784	-1.64064	0.314661
GSTM1	-2.02633	-2.03761	-1.97513	-1.99148	-2.14262	-2.15937	-2.16496	-2.40501	-1.50956	-0.783334	0.760263	-2.07225	-2.06041	-2.52516	-1.96079	-1.66759	-1.92888	-2.33671	0.108286
TPM1	1.14024	0.458155	1.08084	0.80729	0.839945	0.934884	1.27516	1.09778	1.23827	0.461316	1.19202	0.982534	0.54454	0.229492	1.29485	0.853442	0.281442	1.01057	0.561349
CLTA	-1.07629	-0.892235	-0.913186	-0.805156	-0.750122	-0.852641	-1.13427	-0.761366	-0.854303	-0.864803	-0.314287	-0.93406	-0.715952	-1.05163	-0.828838	-0.525998	-0.662613	-0.414165	0.134154
CLTB	-1.32574	-0.958093	-0.759649	-0.642566	-0.959205	-1.32999	-0.996195	-0.967461	-0.843275	-0.749994	-1.1722	-1.25807	-0.912934	-1.05797	-1.23363	-0.656323	-0.843058	-0.860899	0.692669
ANXA4	0.197547	0.262142	-0.288606	-0.248562	0.00270063	-0.382581	0.245223	-0.242567	-0.174298	0.210924	0.308181	-0.0079694	-0.32317	0.216226	0.0272487	0.412441	0.0970221	0.0164574	0.39129
INHBB	-0.397517	-0.257658	-0.732231	-0.612647	-0.686082	-0.901059	-0.490866	-0.688157	-0.426574	-0.0252958	-0.41396	-0.812865	-0.235799	0.371826	-0.216635	-0.825918	-0.572473	-0.122964	0.160169
CNP	-1.1557	-0.827177	-1.16427	-2.20887	-1.16001	-2.1545	-1.27681	-1.84799	-1.00854	-1.09078	-1.31681	-1.61756	-1.56846	-1.46099	-1.21373	-1.43043	-1.18055	-0.95119	0.191197
CD7	0.481157	0.887559	-0.541679	-0.692323	0.690776	0.749812	0.978085	0.110548	0.582706	0.920753	0.701671	-0.510258	0.335317	0.391082	0.630086	-0.111397	-0.351215	0.39424	0.882709
CSF1	3.23194	3.551	3.20161	3.27407	3.29833	3.26421	3.24884	3.30821	3.21057	3.13961	3.39979	3.08907	3.43229	3.23797	3.35175	3.31738	3.2641	3.56256	0.642132
PDGFRB	-0.252089	-0.0929345	-0.433366	-0.153191	-0.0938137	-0.145056	-0.0122269	-0.470521	-0.162638	-0.00896473	-0.356732	-0.375406	-0.1078	-0.500894	-0.269357	-0.0917638	-0.163645	-0.121873	0.759126
DLD	-1.04274	-1.23043	-0.81675	-1.47945	-0.804219	-1.2558	-1.32807	-1.28542	-1.347	-0.878274	-1.27741	-1.7687	-1.08178	-1.40447	-1.54356	-0.984245	-1.41367	-0.872504	0.681306
HNRNPA1	0.991391	0.965188	0.537124	0.859011	0.93844	0.873891	0.948762	0.737152	0.49239	0.937437	0.954402	0.360352	0.599382	0.987629	0.900627	1.01161	0.84587	0.905281	0.860751
SNRPA1	-0.642651	-0.43148	-0.442397	-0.62943	-0.521896	-0.594117	-0.262403	-0.747824	-0.506343	-0.768768	-0.637019	-0.967657	-0.61471	-0.824778	-0.438043	-0.655981	-0.575877	-0.640821	0.290859
CTSH	2.56431	2.95486	2.72089	2.9928	3.07491	2.86735	2.81667	3.16235	2.81063	3.05278	3.28444	2.89309	3.03105	2.92371	3.05347	3.10674	2.76101	3.26342	0.347225
COX6C	-2.61866	-2.87975	-2.57112	-2.7114	-2.8688	-2.54042	-2.68264	-2.60154	-2.56186	-2.85226	-1.76699	-2.76143	-2.63292	-2.78372	-2.41081	-2.5663	-2.75322	-2.82557	0.872245
TACSTD2	-1.37932	-0.921486	-1.05154	-1.08953	-1.26077	-1.35157	-0.922425	-0.919274	-1.16881	-0.90611	-0.788366	-0.991946	-0.849043	-1.0008	-0.898447	-0.984871	-1.10034	-0.84094	0.102403
FGR	-1.57222	-1.27206	-1.64853	-1.61373	-1.79195	-2.0089	-1.63769	-1.56221	-1.4205	-1.5793	-1.65092	-2.31182	-2.01668	-1.88859	-2.20931	-1.97343	-1.45539	-1.41274	0.139238
C1S	2.00742	2.14504	1.98497	1.80554	2.13313	2.13097	1.85928	1.97891	2.0215	1.96189	2.26651	2.0201	1.92873	2.29591	2.09675	2.1703	1.84233	2.21302	0.867182
ALOX5	-1.22945	-1.55551	-1.40868	-1.18088	-1.31453	-1.21281	-1.09695	-1.1941	-2.02626	-1.57224	-1.25574	-1.72752	-1.39723	-1.42755	-1.74014	-1.6798	-1.91834	-1.67024	0.3246
ALPI	0.669722	1.00077	0.436833	0.498225	0.854124	0.623931	0.559441	0.722299	1.04073	0.761273	1.34705	1.00887	1.10952	0.851071	0.810529	0.910754	0.729144	1.27245	0.370116
UCHL1	-0.686749	-0.501403	-1.52843	-1.50108	-0.354639	-1.40896	-1.3691	-0.559215	-0.732161	-1.64145	-0.70004	-0.782469	-1.58236	-2.31634	-1.68456	0.29501	-0.122428	-0.434418	0.0232749
FURIN	-1.77307	-0.698395	-1.40981	-0.655774	-1.99596	-1.27576	-1.30666	-1.68774	-3.36315	-1.82127	-0.92784	-1.79115	-1.29537	-2.42564	0.0188423	-1.45524	-1.52621	-1.15359	0.754021
LTA4H	1.72755	1.81803	1.6351	1.3276	1.3321	1.43479	1.57915	1.51933	1.60587	1.58664	1.85371	1.38894	1.14428	1.34856	1.03841	1.1753	1.02597	1.30786	0.00107005
ALDOC	0.677644	1.31548	0.581789	0.552405	0.563261	0.769348	1.10959	0.58414	0.38261	1.26433	0.689617	0.269754	0.856483	1.43908	0.688174	1.33258	0.708809	0.882894	0.768556
C4A	6.32024	6.40853	6.10417	6.31059	6.43828	6.36765	6.23776	6.33963	6.33284	6.31441	6.73697	6.54395	6.42276	6.65188	6.3828	6.2663	6.43526	6.41691	0.210459
C4B	3.64504	4.17455	3.3954	3.64812	3.69592	3.61765	3.84647	3.70298	3.71415	4.0023	4.23006	3.79793	3.83625	4.47594	4.19556	3.77736	3.94609	3.82178	0.138926
H2AZ1;H2AZ2	-0.663141	-0.696247	-0.664999	-0.511384	-0.206453	-0.655432	-0.769822	-0.0881322	-0.815874	-0.640304	-0.911397	0.166239	0.111143	0.208068	0.00700256	0.0411081	0.472923	-0.549555	0.119756
UQCRFS1P1;UQCRFS1	-2.65767	-2.5772	-4.01101	-1.83398	-4.28468	-3.258	-2.92398	-2.33591	-4.05003	-3.50678	-1.29778	-2.76256	-3.3196	-2.13418	-1.66272	-2.17435	-4.12222	-2.10634	0.899496
ELFN1	-2.73968	-2.84433	-2.7202	-2.75513	-2.79179	-2.95853	-2.87196	-1.65789	-1.67577	-2.55472	-2.16235	-2.77886	-2.81016	-2.90849	-2.6014	-2.70455	-2.63255	-2.27171	0.125779
GSTT2;GSTT2B	-1.80409	-0.384597	-1.51612	-1.73246	-1.11121	-0.672132	-1.74104	-0.96223	-0.476826	-2.84328	-1.06563	-0.953742	-1.26178	-1.267	-1.95164	-3.10929	-2.15354	-0.645391	0.766811
PGA3	5.49467	5.19969	5.40426	5.25553	5.57198	5.34253	5.31307	5.2007	5.55918	5.21706	5.48225	5.64295	5.26947	4.99176	5.14242	5.05828	4.91266	5.06676	0.0394115
SAA1	4.64877	4.97121	4.63641	4.94272	4.76434	4.95809	4.59032	4.80062	4.42454	4.66713	4.8852	4.30837	4.83748	4.85739	4.63905	4.68862	4.66361	5.1044	0.501121
SAA2	2.15773	2.54949	2.28337	2.63744	2.55297	2.71788	2.45938	2.61363	2.00703	2.28229	2.91912	2.80547	2.84013	2.58516	3.03062	2.22121	2.5539	2.74439	0.209646
MT1HL1	-2.90153	-3.03779	-3.0346	-3.65206	-3.80551	-2.53124	-2.67695	-3.00675	-3.91605	-4.70521	-3.08703	-2.15131	-3.30394	-2.89204	-2.27459	-3.83498	-2.28318	-2.61344	0.937646
INAFM2	2.81982	2.46293	2.3756	2.33866	2.4708	2.10882	2.80111	2.53226	2.34317	2.35952	2.08697	2.50004	2.50632	2.82533	2.74945	1.79231	2.72193	2.19147	0.29552
ATXN8OS	-6.4603	-6.10371	-5.9368	-6.34334	-6.50944	-6.20842	-6.28568	-4.65746	-6.47842	-6.09731	-6.33195	-6.34567	-4.90929	-6.22405	-6.21616	-6.17585	-5.67463	-6.02714	0.707841
HSPA1A;HSPA1B	3.69696	3.95822	3.74042	3.81867	3.87478	3.84965	3.79833	3.91507	3.79732	3.94922	4.06803	3.8665	3.82763	3.91248	3.82816	3.94249	3.9597	4.05481	0.096333
IGLC2	8.2226	8.58808	8.18774	8.25741	8.18119	8.23809	8.44601	8.25072	8.27666	8.41973	8.35497	8.55092	8.76635	8.63422	8.8511	8.50379	8.73331	8.34569	0.00933132
IGHV1-8	0.783758	-0.494669	0.275905	0.316222	0.443574	0.579121	0.572845	-0.483541	-0.0759011	0.555739	1.08657	0.0783407	0.495879	1.01664	0.124685	1.06465	-0.43061	0.293883	0.764468
IGHV4-38-2	0.30081	-0.376222	0.102141	-0.0995039	0.437955	0.545113	0.303823	-0.164835	0.407528	0.814468	0.668082	-0.342601	0.527901	1.38211	-0.308691	0.978299	-0.34707	0.476363	0.896044
CALM1;CALM2;CALM3	3.49766	3.72439	3.54774	3.49245	3.61358	3.61286	3.54222	3.56959	3.62727	3.79617	3.61751	3.27729	3.40628	3.95143	3.56845	3.94357	4.02253	3.4949	0.637988
SLURP2	2.95745	3.12081	2.56301	2.85596	2.93226	2.8504	3.00911	2.82747	2.99707	3.02009	2.94987	2.30107	3.1713	3.79294	3.36206	3.28436	3.07617	3.78932	0.0504073
TUBA3C;TUBA3D	-1.81874	-1.16729	-2.2546	-2.00519	-0.506724	-1.09121	-1.31394	0.269003	-1.3523	-0.86491	-1.00876	-1.3307	-1.11076	-0.998689	0.233208	-0.909165	0.644489	-1.26666	0.413231
IGHV3-38-3	-1.54728	-0.372429	-0.864025	-1.08921	-0.792308	-1.24411	-1.08109	-2.33157	-0.326794	-0.567402	-0.861263	-0.562953	-0.470534	-0.113586	-0.912062	-0.795612	-1.09692	-0.645891	0.590789
IGHV8-51-1	-2.43695	-2.43507	-2.42977	-2.42393	-2.37482	-2.45185	-2.44853	-2.45272	-2.44193	-2.44755	-2.4417	-2.44047	-2.44351	-2.44795	-2.43467	-2.43994	-2.46018	-2.42743	0.374882
AMY1B;AMY1C;AMY1A	-0.0181768	-0.281328	-0.232054	-0.262473	0.156839	-0.231281	0.315292	-0.0802411	-0.462994	-0.173083	0.0600573	0.460337	0.417663	0.164266	-0.0634302	-0.597401	0.0794102	0.119131	0.647926
FDX1	-0.273594	-0.940571	-1.48488	-1.15767	-1.18071	-0.917875	-1.05115	-0.671564	-0.939223	-1.00293	-0.791076	-0.620115	-0.818448	-0.979056	-0.82827	-1.02027	-0.537007	-1.06373	0.909879
SRGN	-0.161934	-1.2183	-0.939649	-0.631353	-0.3594	-0.346884	-0.88064	-0.765806	-0.33163	-0.890934	-0.640753	-0.0808025	-1.17045	-0.963372	-0.288949	-0.716352	0.259552	-0.88773	0.848405
CXCL8	-0.114545	0.178023	0.352639	-0.318236	0.207584	0.219281	-0.580179	-0.291269	0.131705	0.112604	-0.511538	-0.330696	-0.123097	-1.30405	-0.597378	0.2395	0.343739	-0.535238	0.224801
RNASE2	4.84031	5.08165	4.89883	4.58769	4.75319	4.77356	4.89734	4.80753	5.00207	4.79736	4.93556	5.10636	4.97169	5.33189	5.4865	4.86615	5.15737	4.46141	0.0916864
RO60	-2.20839	-1.97724	-2.26261	-2.78317	-2.97438	-2.48004	-1.32925	-1.56756	-2.35332	-2.04647	-1.41394	-1.74685	-2.21039	-0.673876	-0.484537	-1.46641	-0.828381	-1.46687	0.0184797
GAA	2.57837	2.54277	2.5349	2.66943	2.77216	2.79807	2.67495	2.58865	2.28283	2.62906	3.18755	2.73848	2.8278	3.14223	2.95772	2.94817	2.63386	3.05838	0.0565392
RRAS	-3.11682	-2.36311	-3.02304	-2.98437	-3.02844	-2.77215	-2.87444	-2.95614	-3.03042	-2.11539	-2.89523	-2.25831	-2.89201	-2.85624	-2.34159	-2.8866	-3.07846	-2.80364	0.242931
HLA-C	0.270071	0.104424	0.0232545	0.21276	0.294117	-0.0389228	0.544501	0.12512	0.12234	0.0753569	0.202896	-0.00392797	0.415245	0.530392	0.294946	0.0826557	-0.0205643	0.63418	0.478993
H1-4	3.40906	3.96854	3.20804	3.77345	3.59176	3.72387	3.29356	4.04777	2.70969	3.47001	4.04736	3.37636	3.85908	3.7104	3.92633	3.88202	4.25441	4.37796	0.202696
SPP1	2.69844	3.38624	2.76203	2.96774	2.80992	3.03644	3.15899	3.38192	3.20634	3.3877	3.19575	2.74998	3.18112	3.43834	3.76222	2.99373	3.1564	3.22122	0.178977
DLAT	-0.134975	-0.242597	-0.714024	-0.787882	-0.366868	-0.641257	-0.235446	-0.874809	-0.706514	-0.749669	-0.559717	-0.942943	-1.34412	-1.46038	-0.254183	-0.725226	-0.284889	-0.363991	0.353665
PTPRF	-1.30089	-0.993282	-1.38374	-1.38917	-1.101	-1.42377	-1.27698	-1.1061	-1.45189	-1.09275	-1.45489	-1.07738	-1.47262	-2.18185	-1.47859	-1.2007	-1.20471	-1.21342	0.127811
TXN	5.34795	5.26364	5.10714	5.20379	5.26277	5.2236	5.26981	5.15039	5.26086	5.28296	5.29266	4.87148	5.09047	5.42866	5.21023	5.3329	4.9762	5.2517	0.9674
COX5B	-0.66076	-0.796435	-0.561698	-0.404317	-0.657727	-0.332851	-0.248067	-0.697566	-0.185868	0.187986	-0.752063	-0.720345	-0.626373	-0.118102	-0.291621	-0.222892	-0.332226	-0.777178	0.820301
CTSA	3.43243	3.37515	3.33279	3.27735	3.40241	3.33883	3.34502	3.74686	3.64142	3.28779	3.63184	3.48587	3.24025	3.40252	3.43711	3.18255	3.23897	3.45759	0.205113
MGST1	-2.14601	-1.89328	-2.42191	-2.43672	-2.63573	-2.10229	-0.868239	-2.90938	-2.61579	-1.8067	-0.925539	-2.3958	-2.63778	-2.52197	-2.50018	-0.801494	-1.11641	-1.32825	0.0820514
C7	2.61232	2.76385	2.51181	2.5371	2.56674	2.73579	2.83077	2.72861	2.80096	2.54596	2.98876	2.87102	2.76922	2.7926	2.96936	2.59254	2.73557	2.94281	0.327966
PRKAR1A	-0.577296	-0.294533	-0.0537781	-0.414377	-0.451279	-0.394406	-0.657226	-0.190458	-0.440208	-0.282685	-0.168962	-0.407676	-0.225065	-0.470507	-0.212636	-0.212386	-0.0499295	0.0536027	0.206068
CHGA	-2.74385	-2.19976	-3.60539	-2.01426	-2.48235	-1.45065	-1.45252	-2.77065	-2.2192	-3.17011	-2.00184	-1.69099	-3.41007	-1.16854	-2.16117	-2.36935	-3.00101	-1.76165	0.804653
TFPI	-3.45439	-2.48551	-3.57505	-3.21108	-2.07382	-2.43863	-2.83935	-3.4226	-3.0894	-2.25332	-2.70419	-2.74467	-2.55183	-2.11888	-3.13946	-2.79424	-3.15393	-2.85692	0.35168
PF4V1	-2.00751	-1.24619	-1.39377	-1.97486	-1.51943	-1.73807	-2.59295	-1.12885	-2.80061	-2.51076	-0.574491	-1.22381	-1.60415	-2.75478	-1.32841	-3.01584	-1.82534	-1.75394	0.713784
KIT	-1.25964	-0.662087	-1.06284	-1.97247	-1.63048	-1.08519	-1.07425	-0.279377	-1.26485	-1.17314	-0.698761	-1.27534	-1.12601	-1.86188	-1.95597	-1.20029	-2.00446	-0.869339	0.250795
UROS	-0.24381	-0.373202	-0.278875	-0.222629	-0.832028	-0.318804	-0.546745	-0.452298	-0.371084	-0.489463	0.132458	-0.755402	0.211953	-0.537022	-0.0898552	-0.402507	-0.515369	-0.127162	0.770497
ESD	2.43466	2.64851	2.32477	2.52555	2.43155	2.74392	2.41319	2.57889	2.47283	2.53021	3.08716	2.62873	2.65773	2.54336	2.88857	2.56491	2.50604	2.97657	0.455036
HSPD1	-1.22617	-1.19174	-1.47947	-1.1428	-1.20224	-1.09386	-1.27927	-1.27634	-1.29051	-1.20067	-0.960059	-1.33432	-1.16106	-1.06276	-1.436	-0.965165	-1.43922	-1.22103	0.820869
CLU	5.20116	5.06241	5.31833	5.3727	5.25099	5.27149	5.27067	5.31687	5.57331	5.03462	5.49763	5.35221	5.16689	5.01978	5.3802	5.17802	5.2335	5.50265	0.69299
GHR	-1.71012	-1.67478	-2.43562	-2.2435	-2.36906	-2.45057	-2.49534	-1.74194	-1.1566	-1.95241	-2.38205	-1.16561	-2.17919	-2.71867	-2.83853	-2.40107	-2.78976	-2.05109	0.239553
HSPA5	1.35935	1.50763	1.36817	1.34677	1.34289	1.34415	1.28433	1.29616	1.43685	1.84164	1.53324	1.20142	1.40415	1.56712	1.41549	1.66023	1.52722	1.48714	0.395417
LAMC1	-0.556389	-0.71685	0.77557	-0.977801	-0.595141	-0.523161	-0.400027	-0.445081	-0.0158511	-0.486352	-0.953337	-0.677859	-0.809029	-1.49639	-0.413524	-0.0728057	-1.067	-0.0766609	0.458514
ACP2	4.27465	4.22789	4.08811	4.29118	4.15825	4.14254	4.3511	4.1899	4.33504	4.07855	4.24877	4.14078	4.17963	4.42046	4.03212	4.16379	4.19705	4.28348	0.77904
HSPA8	3.78164	4.01992	3.81838	3.82449	3.81652	3.73254	3.80917	3.82341	3.89852	4.062	4.04633	3.73926	3.85814	4.06464	3.9799	4.03619	3.86456	4.09994	0.270689
SLC2A1	1.31982	0.911157	1.03663	0.344941	0.55218	0.425493	1.5802	0.611799	1.26379	0.679915	2.14749	1.12966	0.567897	1.19154	1.87824	1.17497	1.23499	1.3643	0.280147
SLC2A3	-1.37152	-1.94072	-1.90977	-2.00489	-1.35072	-1.76319	-0.716683	-0.975114	-1.70223	-1.85097	-1.27526	-1.72993	-1.8866	-1.65179	-0.984446	-1.19381	-0.897551	-1.97289	0.515787
EPB41	0.164744	0.212321	-0.169203	0.0479735	-0.135031	0.0268448	0.174337	0.15292	0.047525	-0.0381923	0.652186	0.327871	0.36857	0.346545	0.834732	-0.153631	0.293603	0.32201	0.140557
PDHB	-0.508371	-1.52932	-1.46228	-1.12496	-1.93402	-0.590861	-0.27563	-1.19778	-1.63602	-1.17399	-0.91577	-0.530983	-0.0729761	-1.48954	0.265587	-0.54086	-1.32777	-0.905613	0.700393
ITGAM	3.71502	3.78898	3.50767	3.57138	3.94071	3.65294	3.71476	3.67984	3.95642	3.95934	4.07279	3.76618	3.73683	4.01832	3.70224	3.69403	3.80823	3.82739	0.444813
PYGB	-0.542256	-0.960733	-3.23893	-2.09932	-2.88985	-1.36124	-0.709431	-1.92712	1.66055	-1.97283	0.0547379	-1.19425	-0.981952	-2.28418	0.113249	-2.03009	-0.566438	0.420072	0.621595
MBL2	0.090895	-0.232751	0.109887	0.0663828	-0.207297	0.00701381	-0.0362033	0.153877	0.245491	-0.0488343	0.378749	-0.0399693	-0.0664579	0.01048	-0.345169	0.13474	0.0560278	0.0724702	0.449475
RALA	-1.76706	-1.3407	-2.11013	-1.57619	-1.9961	-1.87853	-1.44788	-1.76036	-1.67927	-1.46136	-1.76992	-1.84652	-2.04169	-1.70692	-1.76013	-2.14707	-2.04456	-1.38351	0.89504
RALB	-0.530116	-0.82116	-0.965094	-1.05703	-0.960836	-0.89131	-0.595183	-1.0892	-0.612033	-0.9811	-0.49606	-1.52598	-1.15604	-1.1321	-0.865365	-0.710807	-1.44482	-1.02218	0.718489
SPTB	0.406949	0.229285	0.0731117	-0.446289	-0.230436	-0.457896	0.608316	-0.769892	0.692217	-0.324944	1.35306	-0.051222	-0.348584	-0.00120413	0.442976	0.775912	0.229605	0.557455	0.479055
LAMP1	2.628	2.84033	2.66618	2.51101	2.79175	2.56035	2.59022	2.56753	2.73015	2.79038	2.80637	2.42796	2.64232	2.81207	2.50501	2.80751	2.5135	2.91314	0.921183
ACADM	-0.755121	-1.33018	-1.0891	-0.839892	-0.993442	-0.872138	-0.503499	-0.804164	-1.15427	-0.795966	-0.227319	-1.54483	-0.418082	-0.987505	-0.938811	-0.555475	-0.557997	-0.9088	0.850312
FGFR1	0.925111	0.180118	0.511463	1.12857	0.633395	0.806049	1.09489	1.03843	0.536072	1.18924	0.756526	0.553274	1.08066	1.47618	1.0356	0.388135	0.916365	0.718643	0.214237
G6PD	2.78145	2.82813	2.64257	2.66561	2.6017	2.69534	2.85792	2.73524	2.74401	2.68513	2.90038	2.84037	2.64434	2.78238	2.77544	2.05322	2.22078	2.14894	3.57835e-06
MTHFD1	-0.300565	-0.326502	-0.634763	-0.789497	-0.202423	-0.498284	-0.315348	-0.412117	-0.326974	-0.658617	-0.118178	-0.450409	-0.51335	-0.453346	-0.43161	-0.318543	-0.477823	-0.119	0.845719
CETP	-0.530717	-0.848876	-1.04445	-0.951296	-0.829754	-0.581451	-0.624507	-0.958535	-1.00714	-0.800506	-0.225734	-0.82933	-0.815253	-0.367728	-0.882433	-0.591618	-0.930373	-0.6731	0.85423
EPX	-1.02256	-0.61599	-0.843088	-0.905744	-0.578948	-1.133	0.128136	-1.55418	-0.550099	-0.666832	-1.29546	-1.4691	-0.970925	-1.42717	-0.888564	-0.598893	-1.07302	-1.24305	0.782507
SCGB1A1	4.09298	4.34362	4.40073	4.43345	4.21796	4.32225	4.0937	4.4728	4.31997	4.13152	4.401	3.98582	4.33622	3.97087	4.2374	4.3158	4.18722	4.65039	0.716458
IGF2R	-1.1063	-0.960113	-1.03718	-1.31224	-1.16842	-1.31948	-1.28366	-1.19009	-1.20289	-1.29151	-1.20448	-1.2246	-1.29022	-1.26298	-1.46899	-0.919811	-1.03806	-1.09278	0.00136933
ADH5	0.453605	0.475508	0.289565	0.355685	0.328661	0.222403	0.701465	0.521819	0.677783	0.298004	0.46571	0.327252	0.253927	0.49333	0.32903	0.205895	0.273559	0.35675	0.00748012
PRPS2	-1.80218	-1.267	-1.79587	-0.88934	-1.72983	-1.82208	-1.60577	-1.98711	-1.73368	-0.113923	-1.12301	-1.73177	-1.78403	-1.90565	-1.7851	-1.59107	-1.75927	-0.741963	0.34512
PABPC1	0.817644	1.02672	0.686536	0.83834	0.675548	0.803693	0.617302	0.793378	0.519474	0.760084	0.67012	0.907697	0.745999	0.486999	0.523947	0.538132	0.846459	0.827836	0.303786
PCNA	-1.14295	-1.13018	-1.42332	-1.2904	0.539265	-2.45775	-1.16441	-1.7998	-1.27306	-1.57937	-0.793672	-0.867977	-2.24425	-1.36967	-2.26677	0.318462	-2.16858	-1.1014	0.749048
HARS1	-0.0699609	0.242662	0.0139429	0.0380315	0.11709	0.0290322	0.110148	0.078661	-0.0512677	0.311141	0.0489668	-0.344266	0.0600584	0.0947492	-0.101178	0.06993	0.119285	-0.0871522	0.997255
FABP2	-2.73076	-3.74636	-2.31118	-4.31365	-4.20766	-3.74017	-2.82843	-2.16018	-2.03907	-3.58747	-2.98367	-3.43864	-4.27552	-3.80239	-3.97476	-2.80851	-4.18555	-2.42402	0.0171744
COL6A1	1.85528	1.94072	1.79693	1.83616	1.94406	1.9114	1.73785	1.80193	1.92031	1.76426	2.1415	1.87342	1.84625	2.02365	2.03455	1.92632	1.79814	2.15332	0.701861
COL6A2	-0.991904	-0.260116	-0.774431	-1.1793	-0.796521	-1.11501	-1.08371	-1.31924	-0.541993	-0.818681	-0.378237	-0.0471228	-0.422263	-0.649961	-0.808883	-0.602897	-0.742955	-0.346182	0.177669
COL6A3	3.15519	3.08313	2.98613	3.07781	3.05089	3.07697	2.86577	3.1105	3.07533	2.68312	3.23315	2.89651	2.98499	2.90823	2.89942	3.10718	2.79514	3.35364	0.784068
SLC25A6	-0.455264	-0.453315	-0.636425	0.0935546	-1.0123	-0.0934591	0.524287	-0.0603445	-0.841434	0.603146	1.304	0.0316023	0.589496	1.18119	0.550364	1.49634	0.582299	0.899655	0.0132385
F5	0.392126	0.509001	0.321876	0.217281	0.46964	0.417031	0.452231	0.469817	0.32887	0.423162	0.487425	0.454687	0.313585	0.613082	0.336924	0.252832	0.599284	0.446682	0.970469
IMPDH2	-1.20784	-0.664088	-1.44274	-1.12934	-1.45909	-0.94757	-0.666572	-2.08181	-1.31307	-0.590146	-1.08815	-1.85621	-1.75594	-1.10466	-1.82426	-1.40075	-1.73394	-1.04607	0.855393
TPR	-1.28625	-1.03285	-1.25809	-1.83687	-1.5075	-1.73207	-1.09353	-1.63122	-1.63895	-1.1306	-1.15163	-1.85438	-1.88291	-1.48376	-1.6035	-1.45784	-2.03912	-1.29605	0.331735
PIP	-0.299145	-1.01342	-1.47321	-1.27111	-1.48072	-0.219222	-1.35322	-1.17797	-1.00096	-0.653089	-1.29424	-1.14349	-1.13749	-1.12724	-0.616186	2.26851	-1.04098	-0.583024	0.408555
CKB	-0.313963	-0.471641	-1.15659	-0.9647	-1.19867	-1.30654	-0.638213	-1.1035	-0.810593	-0.743461	-0.571737	-1.04789	-1.82451	-0.252814	-0.622485	-1.01848	-1.31202	-0.53531	0.807016
FCER1A	-2.12592	-2.52209	-1.53759	-2.46542	-2.45099	-2.2532	-2.38373	-1.47295	-2.3707	-2.42511	-2.27207	-1.68304	-2.26167	-2.34896	-2.44511	-2.32226	-2.29728	-2.19385	0.749054
ANXA3	0.506722	0.620875	0.390174	0.514647	0.650902	0.545943	0.82208	0.234464	0.744229	0.534989	1.07969	0.377472	0.680864	1.09613	0.872841	1.27599	1.10226	1.15977	0.0275359
CKMT1A	-1.5484	-1.41513	-1.74737	-1.6523	-1.50889	-1.55819	-1.37297	-1.70819	-1.54894	-1.02965	-1.67702	-1.96767	-1.43088	-1.23389	-1.601	-1.53121	-1.38868	-2.10353	0.931362
RNASE3	0.580627	0.705372	0.624438	0.70948	0.836565	0.672145	0.0911569	1.02348	0.759423	-0.139981	1.1276	1.09003	0.468432	-0.120078	0.123804	-0.418327	0.624357	1.17674	0.73377
ACTN1	3.24931	3.3479	3.10673	3.25446	3.12848	3.24383	3.35206	3.02978	3.20971	3.31765	3.34132	3.07625	3.08379	3.26265	3.05019	2.86538	2.74667	2.94774	0.0167476
ACE	0.0561781	-0.098676	0.282665	-0.317772	0.148912	-0.203593	0.200764	-0.250246	0.136663	-0.312224	-0.0288335	0.83189	-0.591934	-0.260491	0.28619	-0.0409419	-0.0655641	-0.333572	0.774588
CDH1	4.54694	4.63585	4.53617	4.58141	4.62896	4.77513	4.74624	4.57311	4.51286	4.65872	4.73078	4.4821	4.68155	4.99786	4.7715	4.8084	4.68239	4.94543	0.112049
DEFA4	-1.59265	-1.0804	-1.85024	-1.48701	-1.29601	-0.684592	-1.77568	-1.63457	-3.24383	-1.14731	-0.551772	-1.60887	-1.61931	-2.23448	-0.464702	-1.29207	-2.78235	-0.751117	0.525588
MYH1;MYH4	1.18053	1.77772	1.48696	2.08241	1.39996	1.77818	2.04955	2.02866	1.74784	1.62987	2.19789	1.71728	1.90246	1.46412	2.13838	1.20229	0.745349	1.86862	0.243526
MYH7	-3.3001	-3.01703	-3.99829	-3.85427	-2.75799	-3.30492	-3.08612	-3.51593	-3.91459	-3.40874	-2.67402	-3.66223	-2.75219	-3.36952	-1.88603	-3.55157	-3.19564	-2.8622	0.482886
PEPD	0.812703	0.744342	0.509955	0.698337	0.865706	0.999283	0.959652	0.607253	0.830634	0.685818	1.06404	0.696138	0.534413	1.04153	0.835279	1.03256	0.634862	0.692804	0.941335
XRCC6	-1.29368	-1.19342	-1.48466	-1.28606	-1.31553	-1.54142	-1.25979	-1.08933	-1.49096	-0.822755	-1.12179	-1.4739	-1.25363	-1.48236	-1.17345	-1.26578	-1.02988	-1.06501	0.534322
XRCC5	-0.874571	-1.01549	-0.482823	-0.749579	-0.951141	-0.76696	-0.366503	-1.39201	-0.886282	-1.06895	-0.767505	-1.09984	-1.40882	-1.36653	-1.29206	-0.739546	-1.21823	-0.805385	0.2151
COX4I1	-2.15588	-1.54767	-2.02605	-2.27868	-2.27908	-2.04722	-2.42368	-2.32879	-2.38349	-1.50149	-1.14157	-2.34345	-2.06837	-2.26653	-1.93936	-1.50745	-1.20395	-1.67406	0.0316165
GP1BB	-2.17319	-1.91202	-1.69017	-1.29078	-2.34962	-1.29348	-2.21715	-2.04549	-2.37796	-0.267647	-2.15435	-2.0007	-2.1408	-1.91928	-1.2674	-2.00564	-0.219035	-2.20486	0.773137
IFI30	-0.684717	-1.52892	-0.801509	-0.824057	0.0363316	-0.0274462	-0.515097	-1.57967	-1.48242	-0.319861	-0.23968	-1.05701	-1.17443	0.499133	-0.638263	0.0983948	-1.38901	-0.261466	0.463839
LAMP2	4.06831	3.27585	3.29259	3.58947	3.87339	4.12689	3.97315	2.79039	3.63589	3.5618	4.02695	3.73284	3.56838	3.66445	4.29382	3.97532	2.97096	3.40381	0.708928
RNH1	0.743554	0.759342	0.644175	0.456201	0.68417	0.672837	0.863001	0.439036	0.704525	0.716313	1.24768	0.622099	0.313394	0.523828	0.596583	0.972788	0.45155	0.654476	0.422316
CYBA	-1.75468	-1.07687	-1.81438	-1.98575	-1.39262	-1.95448	-1.98551	-2.12321	-2.0942	-2.53593	-2.00838	-2.86987	-2.28667	-1.51789	-1.7331	-1.31209	-1.92856	-1.2795	0.0532203
SCG2	-3.34103	-2.28567	-3.09577	-2.67168	-3.23358	-2.70674	-2.76737	-3.11237	-3.20217	-2.69123	-2.25871	-2.94282	-3.05877	-2.93843	-3.12019	-2.38524	-3.32065	-3.49326	0.763848
NCAM1	1.38096	1.53004	1.29367	1.45721	1.33546	1.13929	1.32461	1.34125	1.35631	1.10868	1.4994	1.22242	1.38737	1.04559	1.23585	1.12772	1.23991	1.53228	0.823264
ICAM2	1.43321	1.82039	0.961774	1.45209	1.59422	1.10938	1.30321	1.17474	1.28701	0.859112	1.39279	1.20415	1.50232	0.596772	1.32838	0.219481	1.40896	0.929197	0.564338
VCAN	-0.524829	-0.266575	-0.937236	-0.207331	-0.667107	-0.728922	-0.884155	-0.183687	-0.185323	-0.689851	-0.577531	-1.02054	-0.226023	-0.768087	-0.665887	-0.587211	-0.333514	-0.230755	0.690384
EEF2	1.05746	0.978049	0.734947	0.766973	1.20309	1.02135	0.991332	1.01428	0.858289	1.08916	1.1172	0.827709	0.806755	0.775884	0.800551	0.892461	0.725989	1.04844	0.541533
MT1G	0.687373	-0.287855	-0.4002	0.210356	-0.453392	-0.635931	-0.120421	-0.0918347	0.573156	-0.61017	0.833148	-0.520025	-1.11859	0.303217	0.825378	-0.693947	0.509509	0.55184	0.975388
KRT10	2.48729	2.11471	3.06644	2.64669	1.31251	5.28235	2.02723	2.7747	3.92597	5.19318	0.814029	0.145264	1.78542	2.07497	2.98479	6.03229	1.20431	2.66876	0.94788
KRT13	-0.0184657	0.146009	0.902645	-0.0750243	0.0108629	0.609339	0.58896	0.183388	0.257033	0.704711	0.894017	0.0137043	0.131091	0.0136531	0.151439	1.71975	0.115585	0.411042	0.609831
KRT5	1.01449	1.17711	1.64138	1.1126	0.780388	3.78505	0.980557	1.22034	1.23531	3.06591	0.757211	0.23151	0.660903	0.80796	1.0958	3.22453	0.634706	1.37354	0.851354
PDIA4	-0.394535	-0.393686	-0.547055	-0.448584	-0.533523	-0.700385	-0.776721	-0.382448	-0.454779	-0.347101	-0.403944	-0.689176	-0.60604	-0.285907	-0.614893	-0.421422	-0.365726	-0.455797	0.84205
C6	2.68656	2.93085	2.65798	2.56695	2.70194	2.62898	2.7515	2.73208	2.61983	2.63684	2.95	2.79756	2.98229	2.82638	2.70429	2.7601	2.95352	3.0316	0.171705
ACP5	-2.61845	-2.08102	-1.72681	-3.21805	-2.35264	-3.26307	-1.93373	-1.56295	-2.95229	-1.71238	-1.87735	-2.92963	-2.89263	-1.99258	-3.02778	-2.81032	-3.27757	-1.68832	0.545958
CEACAM1	0.708371	1.21961	0.939271	0.822704	0.912441	1.15319	1.36054	0.126932	1.35188	0.860521	0.914732	0.923891	0.944137	0.968753	0.538238	1.0334	1.0229	0.92535	0.98852
TPT1	-0.688153	-0.689757	-0.458651	-0.340301	0.0198358	-0.514989	-1.03896	-0.237555	-0.301649	-0.389868	-0.249114	-0.49835	-0.873272	-0.569626	-0.462067	-0.250092	-0.64098	-0.23592	0.495495
ALAD	2.85558	2.79581	2.78986	3.08928	3.01242	2.87012	3.12886	3.01917	3.11715	2.84595	2.91584	2.95973	2.88993	2.99668	3.10153	2.9489	2.86465	2.57657	0.0403076
PRG2	1.1792	1.3913	0.902078	1.18678	1.48949	0.911188	0.978151	1.20338	1.13068	1.06864	1.80722	0.961692	1.25483	1.0734	0.631036	1.06785	0.967018	1.69368	0.891892
HLA-E	-5.20867	-5.44729	-3.22988	-4.66066	-5.30882	-5.54804	-5.32409	-5.02966	-5.28419	-4.97407	-5.16078	-5.59515	-5.43572	-4.71465	-4.78695	-5.53686	-5.28159	-4.97479	0.752312
LCP1	3.11659	3.08763	2.89064	3.04503	3.16225	3.12281	3.07029	3.13869	3.12709	3.11983	3.42966	3.16367	3.178	3.57357	3.23347	3.20657	3.13835	3.26774	0.137512
PLS3	-0.362394	-0.557051	-0.741591	-0.792334	-0.853122	-1.04043	-0.591488	-0.893366	-0.672373	-0.0894227	-0.55199	-0.772523	-0.762828	-0.658752	-0.825714	-1.05216	-0.845914	-0.590044	0.182759
APEH	2.74686	2.47033	2.33445	2.64578	2.58305	2.57926	2.63885	2.42494	2.63747	2.46509	2.9701	2.59792	2.6238	2.52797	2.63293	2.59903	2.43261	2.54859	0.810274
ETFA	-2.64366	-0.77544	-1.08896	2.24187	-2.13651	-3.48687	-2.00435	-1.53156	-3.73418	-1.8965	-1.39781	-2.53575	-2.59515	0.019142	-3.99193	-2.7171	-1.35304	-1.55028	0.936199
GYS1	-0.140742	0.750358	-0.342307	-0.711993	-1.1455	-1.09732	-0.443239	-1.23374	-0.287284	-0.538426	-0.576239	1.63427	0.18152	-0.816548	-1.09639	-0.466103	0.157542	-1.20736	0.385492
PRKAR2A	-1.47045	-1.28178	-1.96644	-1.85934	-1.89604	-1.24428	-1.22296	-1.59805	-1.5357	-1.53727	-1.41628	-1.97532	-1.66827	-1.39139	-1.38149	-1.25952	-1.61567	-1.34675	0.801987
SLC5A1	-1.39899	-0.971681	-0.907528	-2.67423	-1.41533	-1.63791	-1.24463	-1.49108	-1.53695	-1.45174	-1.66079	-0.890904	-0.947672	-1.23135	-0.970352	-1.06012	-1.26511	-1.13887	0.0921024
ANXA8;ANXA8L1	-3.24095	-2.75331	-3.86704	-3.82098	-2.84596	-3.94386	-3.2689	-2.566	-3.51853	-0.893988	-2.50939	-3.62652	-3.30248	-3.11838	-3.2682	-2.02911	-2.44398	-2.49771	0.220442
GTF2F2	-3.23763	-2.85445	-2.00156	-3.28133	-3.03106	-2.7315	-2.96045	-3.21329	-3.12004	-3.28299	-2.30833	-2.94005	-3.00388	-1.33595	-2.99722	-2.96931	-2.52027	-2.40444	0.688893
CD59	6.61209	6.87689	6.86392	6.83647	6.70019	6.84071	6.53047	6.87812	6.84009	6.71051	6.93871	6.68164	6.9861	6.70375	6.90077	7.03314	6.97532	6.99444	0.274778
SELL	0.288568	0.267236	0.177436	0.020767	0.194798	0.268104	0.200471	0.0130185	0.345205	-0.00230485	0.249559	0.0681872	0.283857	0.124671	0.127153	0.0753086	0.218197	0.308152	0.81206
MIF	4.93972	5.05024	5.13479	4.97906	4.96217	4.7055	5.31041	5.18446	4.66257	5.28193	5.33052	4.87322	4.33667	5.6632	5.03474	4.61804	4.56939	4.86227	0.605389
FOLR2	1.01199	0.916895	0.930795	1.00574	1.20612	0.998703	1.11868	0.853408	0.896935	0.822477	1.1101	0.77287	0.828511	0.999232	0.442135	0.839242	0.429329	1.40924	0.783048
CD99	2.31536	2.31667	1.6342	1.81823	1.10022	1.7691	2.87982	1.86267	2.20406	1.90035	1.88539	1.831	2.1401	2.06949	2.04582	1.84479	1.57497	2.04081	0.163188
PRKCSH	-0.527204	0.0659316	-0.446208	-0.31728	-0.186311	-0.0852377	-0.246476	-0.15015	-0.0770541	-0.200444	-0.0708234	-0.281949	-0.163876	0.058159	-0.151459	-0.127701	0.00887818	0.306185	0.305445
HCLS1	-0.894939	-0.296471	-0.419978	-0.087331	-0.00291015	-0.0837923	-0.355188	-0.1442	-0.208511	-0.678634	-0.843413	-1.2615	-0.0734593	-0.725311	-0.204504	-0.425761	-1.41155	-0.841913	0.0227838
FDPS	0.384337	-0.149129	0.333957	0.396605	0.0301961	0.309401	0.332219	0.226573	0.376988	0.0759813	0.0143763	0.479617	0.397827	0.53463	0.392961	0.436194	0.39311	-0.0313928	0.699134
CPM	0.287227	0.278554	0.260968	0.237032	0.147799	-0.116708	0.13707	0.249234	0.350429	0.980313	0.423872	0.148816	0.457913	0.46988	0.231619	0.614173	0.300234	0.609558	0.186958
COX7A2	-2.47599	-2.35059	-3.63323	-2.53028	-3.16022	-2.5893	-2.7601	-3.07264	-3.13261	-2.61615	-2.80009	-3.97571	-2.87599	-3.19542	-2.5654	-0.760903	-2.98104	-3.19609	0.806351
NID1	0.647642	0.331898	0.45839	0.494888	0.760707	0.725609	0.51788	0.541022	0.180041	0.824019	1.00553	0.622925	0.564996	0.750705	0.755496	0.85203	0.77539	0.821211	0.0281151
AKR1A1	-0.0440754	0.0611056	-0.148821	-0.247308	-0.400521	-0.22723	0.354484	-0.0311714	0.200698	-0.30935	0.208366	-0.148337	-0.153439	-0.0323215	0.224883	-0.518755	-0.839638	-0.164652	0.0280018
PLA2G2A	-3.8182	-3.85933	-3.68395	-3.17044	-2.6559	-2.67198	-3.71878	-2.35091	-4.42751	-3.09251	-2.35082	-3.67944	-4.22785	-3.94802	-3.95337	-2.24314	-3.56221	-3.40734	0.177243
NCF1	-2.0564	-2.1551	-2.29801	-2.52956	-2.43913	-1.91997	-1.45584	-2.73606	-2.34106	-2.02214	-1.63204	-2.34987	-2.29716	-2.36389	-1.94268	-1.99971	-1.96627	-2.20177	0.921152
PKM	3.9414	4.21301	3.91196	3.88037	3.97234	3.87556	3.94924	3.97188	4.05873	4.08722	4.40266	4.15598	3.79962	4.20753	4.01944	3.88745	3.7031	4.19693	0.331287
HSP90B1	-0.283907	-0.387479	-0.672251	-0.889802	-0.13861	-0.613481	-0.0819797	-0.358501	-0.80746	-0.0919283	-0.329717	-0.697715	0.32149	-0.77541	-0.0631951	-0.0127088	-0.558978	-0.422949	0.868673
MYL6B	0.279979	0.228739	-0.270039	0.458593	0.212393	0.129832	0.766789	1.12783	0.228434	0.318908	1.23031	0.813045	1.46034	0.384158	1.11371	0.531369	0.912999	1.27417	0.0926387
SNRPB;SNRPN	-0.976037	-1.10711	-1.19261	-0.767575	-0.955454	-0.928483	-0.869386	-0.789835	-1.10251	-1.17162	-0.97392	-0.561658	-1.06882	-0.769597	-0.791094	-1.26495	-0.997468	-0.634907	0.818613
IDE	-2.26505	-2.37273	-1.55754	-1.74815	-2.05033	-2.34993	-2.1644	-1.65898	-1.52084	-0.0586117	-1.27061	-2.39135	-2.27235	-1.20092	-2.42013	-1.45501	-1.5517	-1.26768	0.472299
IL1R1	-2.9124	-2.14417	-2.51692	-2.47696	-2.61469	-2.43719	-2.95244	-1.9122	-3.58468	-2.46226	-3.10487	-1.80399	-2.608	-3.12457	-3.2783	-2.93568	-0.172393	-3.17782	0.824869
MMP9	2.55183	2.51288	2.22003	2.3993	2.49937	2.39286	2.57503	2.49301	2.56983	2.29135	2.60322	2.54267	2.52914	2.52353	2.46127	2.44632	2.56058	2.63713	0.655958
IL2RB	-0.958296	-1.0503	-1.09376	-1.00536	-1.20946	-1.05349	-1.05039	-1.22801	-1.35581	-0.910122	-1.14495	-1.55572	-1.50474	-2.19374	-1.57706	-1.5681	-1.28341	-1.14266	0.0315687
COX6B1	0.0720253	0.180378	0.020206	0.191038	-0.119327	0.115284	0.329985	-0.0252406	-0.945415	-0.00607319	-0.146512	-0.282003	-0.15391	0.164873	-0.326394	0.0353858	-0.200344	0.352949	0.783737
HNRNPL	-1.76828	-1.50523	-2.05962	-1.2526	-1.76769	-1.37238	-1.66537	-1.30699	-1.79195	-1.60003	-1.3924	-1.53406	-1.66	-1.27375	-1.46028	-1.47125	-1.53578	-1.44907	0.453901
DARS1	-1.61795	-1.16123	-2.02144	-1.86978	-1.61556	-1.96253	-1.37886	-1.74471	-1.4503	-0.917014	-0.969384	-1.54532	-1.66912	-2.08975	-1.3684	-1.39346	-1.63569	-1.38943	0.179196
JUP	-1.88587	-2.07586	-1.79737	-1.83472	-1.96952	1.36854	-2.41761	-1.57613	-1.4881	0.418678	-1.89689	-1.84199	-1.83278	-1.93083	-1.48769	-0.205325	-1.55482	-1.69522	0.697697
UQCRB	-1.00942	-1.88062	-1.56737	-0.68705	-2.16988	-1.26152	-0.97686	-0.954542	-2.28943	-1.55682	-1.49591	-1.99719	-2.16014	-1.71527	-0.707004	-0.791481	-0.730214	-1.49324	0.815628
FABP4	1.08617	1.48343	1.16897	1.3116	1.21745	0.976182	1.10609	1.18107	1.31685	1.31298	1.02381	1.2142	1.52288	1.52798	1.40418	1.23443	1.37307	1.44546	0.120451
GLUL	-0.579818	-0.318991	-1.11724	-0.635376	-0.65027	-0.899937	-0.480012	-0.748849	-0.397752	0.729315	-0.44145	-0.347432	-0.649582	-0.45186	-0.334579	-0.351413	-0.473574	-0.418852	0.208747
AKR1B1	-0.188842	-0.0234756	-0.182016	-0.365048	-0.209918	-0.517698	-0.357673	-0.123103	-0.443785	-0.236755	0.00973304	-0.281804	-0.134451	-0.349222	-0.3223	-0.288387	-0.236381	-0.153367	0.320198
ANPEP	3.67794	3.63124	3.57539	3.62914	3.65007	3.61455	3.66234	3.64726	3.72782	3.67462	3.88383	3.54757	3.68036	3.83038	3.69004	3.53255	3.70228	3.7011	0.669808
PVR	0.654562	0.637506	0.599736	0.416799	0.519853	0.546473	0.491545	0.532	0.446445	0.532921	0.315983	0.131613	0.829971	0.527812	0.568677	0.728328	0.743392	0.0868509	0.40748
RAC2	0.574543	0.23315	0.305222	0.457769	0.235111	0.464855	0.482997	0.931978	0.358848	-0.29253	1.5224	1.22816	0.279708	-1.23643	0.323787	-1.29745	-0.58123	-0.452261	0.0565023
CPN1	0.1319	0.43133	0.0506124	-0.135087	0.468929	0.313008	0.493552	-0.0978309	0.235941	0.00589946	0.73983	0.481598	0.388673	0.680158	0.599627	0.326176	0.189096	0.705649	0.550444
GSPT1	-1.8215	-2.56671	-2.30144	-2.07224	-1.91363	-2.33767	-1.72666	-2.47907	-2.66242	-1.52871	-2.34249	-2.17535	-2.9705	-1.92581	-1.55674	-1.43439	-2.06165	-1.83896	0.788409
ARSA	1.26538	1.29341	1.00188	0.853453	1.37153	1.34181	1.25722	1.18217	1.35919	1.43962	1.54337	1.34509	1.37208	1.75768	1.50086	1.41463	1.18126	1.40342	0.149576
B4GALT1	0.74975	1.1721	0.112754	0.432788	0.570199	0.70462	0.592828	0.42227	0.598253	0.550537	1.19064	0.602749	0.51973	0.892047	0.532965	0.318052	0.292555	1.05347	0.94061
ACP3	1.83762	2.20363	1.77326	1.8452	1.97868	1.8231	1.81864	1.97386	1.80868	2.60509	2.21385	1.73219	1.86062	2.27518	1.74457	1.93465	1.59297	1.96311	0.595403
EZR	2.66064	2.77569	2.4278	2.5329	2.57624	2.33114	2.54992	2.70345	2.7314	2.63721	2.62124	2.2965	2.65577	2.82186	2.3702	2.58109	2.44053	2.54306	0.687987
ATP6V1B1	-0.662373	-0.93873	-1.21683	-1.48915	-0.93449	-1.22078	-0.653267	-1.3147	-0.952216	-0.54467	-0.725036	-0.839782	-1.49489	-0.989272	-0.701835	-0.741001	-1.77743	-1.27438	0.434409
FOLR1	2.87978	2.77995	2.6893	2.82091	2.64873	2.68431	2.81393	2.74983	2.91978	2.52925	2.82228	2.77317	2.49174	2.9248	2.45056	3.04306	2.7831	2.80485	0.414483
UCHL3	-0.000369579	-0.0188066	0.0311827	-0.14147	-0.608851	-0.414478	-0.169061	-0.427458	-0.223818	-0.368769	-0.509973	-0.779874	-0.598517	-0.414464	-0.230506	-0.244717	-0.732787	-0.136813	0.0883032
HPGD	1.95193	1.94811	1.74236	1.68873	1.8269	1.67057	1.97951	1.76045	1.76387	1.72128	1.92169	1.66821	1.70007	1.9962	1.62451	1.71291	1.56686	1.70434	0.425112
VAV1	-1.49933	-1.4996	-1.55457	-1.49892	-1.51448	-1.46307	-1.49025	-1.3942	-1.62051	-1.61412	-1.49159	-1.40904	-1.48534	-1.56669	-1.56901	-1.00699	-1.62962	-0.976706	0.195536
CD46	-0.800722	-0.753797	-0.707049	-1.1837	-0.741909	-0.745385	-0.4005	-0.829685	-0.783392	-1.28656	-1.38006	-0.577032	-0.83672	-0.737201	-0.172524	-2.11645	-0.836582	-0.0877095	0.795694
NME1	1.54761	1.26327	1.57072	1.74515	1.64169	1.4938	1.58946	1.9094	1.82582	0.878698	2.08155	1.74717	1.29638	1.30626	1.16638	1.04225	1.41127	1.93521	0.547648
NQO1	-4.76284	-3.28364	-3.44695	-3.5382	-3.76731	-2.79295	-3.28471	-3.33979	-3.65365	-3.40201	-3.45641	-3.34181	-3.52422	-4.23429	-4.06416	-3.69128	-3.34738	-0.959068	0.410521
GNS	4.57373	4.40489	4.46518	4.55705	4.66026	4.54636	4.66262	4.54248	4.54377	4.77361	4.82104	4.58793	4.3732	5.46579	4.66696	4.55367	4.61415	4.74807	0.590506
IGLL1	5.61139	5.60244	5.25474	5.35225	5.46648	5.38392	5.60051	5.11946	5.51902	5.40842	5.54997	5.21511	5.15626	5.49208	5.25406	5.42197	5.17611	5.70062	0.910583
ARSB	0.694062	1.01737	0.668949	0.727733	0.727073	0.827788	0.719606	0.772379	0.841936	0.86827	0.909338	0.623495	0.941243	1.20074	0.386589	1.03402	0.726844	0.888973	0.979711
RPS2	-1.56831	-1.96547	-1.01437	-1.93017	-1.26626	-1.99753	-1.81849	-1.20308	-1.58432	-1.27818	-1.48119	-2.15432	-1.88851	-2.19061	-1.56227	-1.90782	-0.829776	-1.45353	0.778201
ST6GAL1	-1.3279	-1.82198	-2.6277	-1.64059	-2.23287	-1.27361	-1.40463	-1.09901	-1.93628	-1.58815	-1.63295	-1.74337	-1.38166	-1.66442	-1.34331	-2.24771	-1.34007	-1.77277	0.749294
DSP	-0.344947	-0.200567	0.121227	-0.345794	-0.58356	1.99754	0.21239	-0.413861	-0.164423	2.06112	-0.679312	0.164062	0.287248	0.159741	-0.425445	0.955589	0.0124922	-0.0169422	0.904223
RPA2	-3.96776	-3.83543	-3.85854	-3.89119	-3.75727	-3.83618	-3.96358	-3.95086	-3.3494	-3.24537	-3.28943	-2.7149	-3.81139	-3.04735	-3.88648	-3.76138	-3.60789	-3.73695	0.0396235
MUC1	1.41258	1.33986	0.891785	0.974433	0.956081	0.94471	1.61821	1.16577	1.37381	1.59733	1.3316	1.77748	1.2639	1.54665	1.90021	0.762553	1.26082	1.04197	0.0299405
TIMP2	-0.931401	-0.188701	-0.687313	-0.688022	-0.240571	-0.404299	-0.719363	-0.785411	-0.396253	-0.306216	-0.0673092	-0.867445	-0.462522	-0.000662657	-0.734894	-0.318326	-0.620281	-0.0809536	0.833888
ALOX15	-3.16008	-3.02377	-3.5357	-3.62636	-3.15862	-3.59886	-3.44581	-3.50878	-3.46995	-3.55515	-3.06733	-3.66752	-3.16272	-1.97205	-3.45219	-3.47668	-3.50917	-3.40279	0.35657
NPR1	-2.10265	-1.2485	-2.54047	-2.37369	-1.51871	-2.33169	-1.82495	-2.42138	-2.47536	-2.41898	-2.55759	-2.15389	-2.28735	-2.48014	-2.04184	-2.50414	-2.33898	-2.39494	0.693883
CD44	5.38279	5.80924	5.24926	5.42622	5.31519	5.3791	5.46857	5.47228	5.47287	5.41972	5.63709	5.46517	5.59729	5.52857	5.30773	5.55897	5.53832	5.59459	0.735091
NQO2	0.573346	0.641638	0.508875	0.547046	0.682362	0.540434	0.526993	0.455774	0.397059	0.609954	0.748731	0.43927	0.673252	0.477053	0.185152	0.518429	0.596044	0.693169	0.519506
ACAN	-1.00255	-0.745546	-0.478878	-0.726736	-1.02997	-0.867946	-0.857432	-0.386396	-0.69066	-0.818672	-1.17351	-0.709349	-0.998078	-1.06049	-0.224597	-1.11449	-0.690088	-0.861647	0.838268
CBR1	0.0922892	0.380896	-0.175372	-0.0465024	0.0112608	-0.0604618	0.240375	-0.252414	0.0224939	-0.015806	0.182055	0.0863369	0.114301	0.154849	-0.121285	-0.190907	-0.103127	0.218507	0.927146
ANK1	1.2352	1.5224	1.00406	0.956116	1.16034	0.807838	1.30336	0.605872	1.58926	1.03609	2.05935	1.0355	1.12202	1.32111	1.107	1.66241	1.29397	1.75725	0.48163
PDGFRA	-5.0766	-5.6249	-5.98151	-5.16499	-6.18638	-0.749064	-6.08836	-6.75597	-6.27137	-6.57592	-7.03082	-6.55865	-5.35826	-4.73463	-4.84522	-6.23778	-4.26956	-5.88826	0.211436
GLB1	4.39056	4.34772	4.07075	4.21148	4.34573	4.19267	4.31488	4.10649	4.32148	3.99869	4.41372	4.23271	4.20252	4.16246	4.15143	4.1259	4.17133	4.50029	0.965107
PECAM1	0.970339	1.12711	1.14145	1.27657	1.17434	0.805002	1.32571	1.45143	1.0037	1.09771	1.1886	0.875908	1.3124	0.515416	1.02605	1.21222	1.39807	1.69074	0.273636
PPP3CB	-4.05215	-4.17728	-4.202	-4.01504	-4.04207	-4.10679	-3.47936	-4.05167	-3.18237	-3.78777	-2.739	-3.97445	-3.76304	-4.0844	-3.98902	-3.61306	-4.0582	-3.2511	0.235032
NCK1	-1.62489	-0.863059	-0.435692	-1.02069	-1.27206	-0.800003	-0.926415	-1.01205	-0.663212	-1.1377	-0.69207	-1.44575	-1.23896	-0.36158	-1.14584	-0.409143	-0.772304	-0.536677	0.63408
H1-5	1.45879	1.07911	1.22498	1.5059	1.365	1.49994	1.77994	1.74959	0.569779	0.827016	1.44347	1.15968	1.45562	1.79662	2.24703	1.46756	1.90182	1.66879	0.264778
H1-3	2.10181	2.1097	1.33098	2.30306	2.24559	2.07479	2.21946	1.91183	1.8167	1.99663	2.26219	0.773255	1.52332	2.18608	2.03638	2.76902	2.41788	2.81182	0.140291
H1-2	1.71396	1.08432	1.35269	1.91389	1.2171	1.61944	1.25394	2.44852	0.422793	0.331485	1.66203	1.55047	1.32249	0.364615	2.74293	0.357665	1.39994	1.68499	0.980483
EPCAM	-2.21289	-1.64153	-0.854607	-2.09913	-2.48365	-2.18427	-2.50517	-2.26741	-2.52684	-1.22599	-2.40966	-2.38049	-1.35402	-2.42931	-1.04126	-1.45378	-2.5551	-2.68498	0.376192
POR	-1.11067	-1.18255	-1.14207	-0.251676	-1.04376	-1.20815	-1.0646	-0.887026	-1.34769	-1.10535	-1.11829	-1.23647	-1.14047	-1.15297	-1.41542	-1.07958	-1.3092	-1.11465	0.468995
DPEP1	0.0531547	-0.425174	-0.0211835	-0.593113	-0.34227	0.0122826	-0.257437	-0.197151	-0.22727	-0.0912166	-0.328852	-0.0408037	0.457506	0.0433883	0.0412323	0.41874	-0.197858	0.0491484	0.168588
EPB42	1.15249	1.16851	0.88753	0.403009	0.463821	0.500767	1.07915	0.597927	1.20598	0.306887	1.9297	0.779817	0.424507	0.492646	1.06614	1.19286	0.670792	1.22121	0.431639
ATP2A2	-2.48572	-2.68363	1.14529	-2.82643	-2.23218	-3.05708	-2.46191	-2.36333	-2.50613	-2.51026	-0.330232	-1.68523	-2.44309	-0.00356793	-2.44962	-2.20444	-2.5609	-1.54241	0.665818
CPE	0.0438568	0.0843132	-0.171041	-0.106764	0.127706	0.448487	0.0259113	-0.165912	-0.0951258	0.486573	0.338156	-0.107878	-0.0970583	0.392976	0.0762974	0.481701	0.0953225	0.220486	0.400634
PLCG2	-1.44711	-0.0360423	-1.07459	-0.685613	-1.22793	-0.358957	-0.333009	-1.50255	-1.34773	0.0210605	-1.16477	0.256942	-1.55869	-1.28147	-0.59789	0.316551	-0.146803	0.0933295	0.145738
FAH	1.99917	2.27551	1.59083	1.95688	2.05528	2.00748	1.8774	2.02815	1.64382	1.93254	2.28324	2.35818	2.01794	2.19493	2.06762	2.01052	1.99255	2.42091	0.435458
STMN1	1.12679	1.02417	1.02048	1.17333	1.32572	0.836604	1.00363	1.20102	1.20419	0.904046	1.35867	0.990756	0.877539	1.36267	1.0824	1.29179	1.28379	0.867216	0.994539
YBX3	-0.600308	-0.451998	-0.526253	-0.308908	-0.438315	-0.118518	-0.61982	-0.735296	-1.11617	-0.356927	-0.160879	-1.23739	-0.711304	-0.580512	-0.869583	-0.718897	-0.797811	-0.043213	0.463625
NAGA	2.94024	2.99167	2.87365	3.0078	3.1278	3.06082	3.02446	2.81805	3.07146	3.0299	3.43709	3.16929	3.20376	2.78815	3.11941	3.01467	3.02826	3.07992	0.290356
GOT1	0.695363	0.819636	0.613067	0.591364	0.547428	0.636873	0.816008	0.807268	0.42497	1.14282	0.988012	1.04554	0.815731	1.06042	1.02349	0.686741	0.768707	0.98531	0.00881427
IFNAR1	-1.09604	-2.23583	-1.06259	-1.99528	-0.431385	-2.12486	-1.51422	-1.75574	-1.14129	-2.13859	-0.876018	-2.4055	-2.03915	-2.05266	-1.78779	-1.81485	-1.85195	-2.38438	0.757061
BPI	3.1782	3.05196	2.92549	3.5439	3.22896	3.29902	3.2003	3.29634	2.99196	2.85209	3.4762	3.11927	3.12808	3.26013	3.13266	2.7746	2.78851	3.25536	0.286302
NPR3	-1.51712	-0.868037	-2.45536	-0.854343	-1.62753	-1.2347	-0.0563543	-1.2788	-1.55411	-1.14654	-1.15742	-1.01759	-0.0465173	-0.433607	-1.46354	-1.24975	-1.42825	-1.36919	0.455205
SMPD1	1.48441	1.51674	1.23473	1.27593	1.26279	1.33754	1.4684	1.32143	1.56849	1.45177	1.75681	1.21143	1.2272	0.993168	1.118	1.11183	1.42563	1.47071	0.164366
PRKACA	-2.43555	-1.91297	-2.36047	-2.53377	-2.2694	-2.72441	-2.63569	-2.13269	-2.6614	-2.34314	-1.21589	-2.49171	-1.73509	-1.8143	-1.34676	-2.31098	-2.23779	-2.32593	0.0893165
CAPN2	-0.805546	1.64272	0.239906	0.378726	-0.301577	-0.0966526	-0.122452	-0.0731605	-0.382633	0.350103	-0.302883	0.710198	1.0278	0.395833	0.362731	0.0643229	0.420534	-0.317564	0.665041
GAP43	-6.11806	-5.69267	-5.69589	-5.80025	-5.76351	-4.87821	-6.03588	-5.95628	-5.96678	-5.74694	-5.96098	-6.15678	-5.64709	-4.83759	-5.97711	-5.61801	-5.67388	-4.74021	0.29613
CTPS1	-1.89325	-2.61853	-3.18267	-2.10269	-2.66731	-3.24698	-2.11939	-2.84463	-2.51509	-2.98185	-0.945505	-3.12326	-2.9418	-2.17517	-2.11534	-1.819	-2.76771	-2.47358	0.989164
ENG	0.104291	0.704935	0.205509	0.0385021	0.313424	0.031885	0.342099	-0.569219	0.301116	0.103168	0.103602	-0.558145	0.0997831	-0.173639	0.0835602	0.136433	-0.0351625	0.699252	0.604652
DDX5	-2.28561	-2.12271	-2.21202	-2.26546	-2.17351	-1.98194	-0.948447	-2.35379	-2.26371	-1.0287	-1.24344	-1.7225	-2.14843	-0.728767	-2.30934	-1.41036	-1.69806	-1.57376	0.321621
PFKL	-0.751892	-0.380081	-0.829587	-0.608167	-0.708084	-0.785952	-0.475958	-1.06987	-0.483556	-0.777052	-0.279172	-0.757009	-1.11685	-0.817774	-1.23303	-0.349463	-0.997101	-0.880812	0.40615
GM2A	6.25024	6.46232	6.62239	6.5735	6.65233	6.62902	6.71975	6.5939	6.55646	6.66991	6.62271	6.94429	6.47657	6.80443	6.95161	6.71302	6.74392	6.99168	0.147058
CR1	-0.116415	-0.640235	-0.841236	-0.648822	-0.564773	-0.681976	-0.456573	-0.725947	-0.824295	-0.991637	-0.20644	-0.727677	-0.870248	-0.999151	-0.581367	-0.837657	-0.976174	-0.1826	0.921972
LGALS3	1.16585	0.999188	0.971993	0.877624	0.847696	1.06459	1.12615	0.830743	1.19593	0.955176	0.899867	1.15784	1.09312	0.732363	0.858269	0.998036	1.02847	0.664944	0.69796
IGFBP3	1.52294	1.87136	1.27405	1.28533	1.77646	1.58277	1.65008	1.51638	1.72749	1.53899	1.729	1.22252	1.6667	1.64688	1.70321	1.729	1.30277	1.74434	0.935156
PSMC3	-0.50415	-0.82175	-1.08072	-0.883811	-0.655706	-0.772758	-0.498053	-1.68847	-0.560216	-0.385855	-0.129718	-1.174	-0.77403	-0.716363	-0.726839	-0.364076	-0.910976	-0.336107	0.837842
TCP1	0.49074	0.558397	0.253332	0.124684	0.280952	0.326662	0.391576	0.235782	0.429271	0.361018	0.752379	0.259211	0.149853	-0.0759533	0.263551	0.143778	0.172955	0.0879285	0.073295
IGFBP2	0.852467	1.09393	0.941131	0.981996	1.07632	0.994169	1.01191	1.25483	0.964203	0.786503	0.951657	0.974495	1.11368	1.23746	1.18891	0.788927	1.02017	1.43433	0.433649
ARF4	-0.654361	-0.169543	-0.67049	-0.511254	-0.670577	-0.801896	-0.0221191	-0.151009	-0.736681	-0.244803	-0.149092	-0.535402	-0.30332	0.0600903	-0.290636	-0.690226	-0.771453	-0.669717	0.0914403
RPL7	-0.220031	1.34625	0.280062	0.293031	-0.123663	1.39927	0.818015	0.0367614	-0.0106212	0.22567	0.795278	0.73948	0.780554	-0.0028478	0.121859	0.0137046	0.0326749	0.752607	0.964784
VCL	0.527499	0.526287	0.558804	0.580137	0.563151	0.486587	0.593542	0.670792	0.561786	0.532488	0.583263	0.53885	0.603565	0.747072	0.396142	0.503671	0.516463	0.66841	0.914375
GPX2	-0.02497	-0.175181	0.229064	0.0470381	0.0545593	-0.112237	0.196863	-0.000432066	0.500731	-0.316464	0.27486	0.0437199	0.00779988	0.208846	-0.028225	-0.162438	0.194474	-0.0781437	0.679804
LBP	4.80446	4.17696	4.79803	4.92012	4.56704	5.08709	4.91254	4.74927	4.64971	4.88493	5.1446	4.90082	4.9402	5.28088	4.83031	5.0049	4.83913	4.83638	0.29164
IL1RN	1.88823	1.84205	1.77463	1.71497	1.81894	1.73806	1.45808	1.41111	1.70052	1.60378	1.69056	1.23143	1.4288	1.97823	1.35425	1.96467	1.49688	1.82139	0.316683
ITGB6	-3.04393	-3.26265	-3.18644	-2.23312	-3.38099	-3.2528	-3.28833	-3.0003	-3.20424	-3.51606	-1.95296	-3.04128	-3.11854	-3.41733	-3.23307	-3.26818	-3.34123	-3.09489	0.80075
RHCE;RHD	-1.34306	-1.02144	-2.29624	-2.2762	-2.39489	-1.77229	-0.945087	-1.73846	-1.70008	-2.26931	-0.535025	-0.936831	-1.47849	-0.597404	0.0120932	-1.25819	-0.461957	-1.34014	0.16884
RPL17	-3.41013	-3.74356	-3.60078	-3.25476	-3.47156	-3.69681	-2.39682	-3.43949	-3.49993	-1.91982	-3.74251	-3.8135	-3.88151	-2.41139	-2.7973	-3.64794	-1.97197	-1.58225	0.500875
PGAM1	3.67159	3.84777	3.50343	3.66921	3.59338	3.65402	3.75754	3.6341	3.74248	3.89912	3.82787	3.38101	3.45962	3.98227	3.57322	3.84355	3.63982	3.68992	0.992616
RCC1	-1.50233	-1.69306	-1.58413	0.786364	-2.36045	-1.57958	-1.52877	-2.32346	0.33405	-1.61382	-1.80661	-2.91512	-2.10317	-2.47345	-2.28432	-1.04886	0.63619	0.554872	0.127479
SDC1	1.60042	2.63238	1.3004	2.0248	1.79472	2.16567	1.74355	0.839752	0.878323	1.68091	2.33148	1.64486	1.43171	1.81669	3.12954	2.41038	1.62067	2.82155	0.322046
ATP5PF	-2.88678	-3.05198	-3.5777	-3.18018	-2.87681	-3.13549	-2.79684	-3.57294	-3.46824	-3.46586	-2.90613	-3.70519	-3.31113	-3.61179	-3.40473	-2.5453	-2.08494	-2.39095	0.0108467
KRT4	-2.01599	-2.23234	-0.815267	-1.47293	-1.59989	-1.39347	-1.96772	-1.72168	-1.63351	-1.63509	-1.62543	-2.14559	-1.84622	-2.12914	-2.05168	-0.846477	-1.70139	-1.61788	0.483216
PAM	-0.575663	-0.13451	-0.733543	-0.374066	-0.483361	-0.671025	-0.516039	-0.533502	-0.413973	-0.492206	-0.573453	-0.372719	-0.274304	-0.222404	-0.382677	-0.414757	-0.299227	-0.892876	0.725683
CDH2	0.863114	0.486429	0.669659	0.434409	0.786234	0.881092	0.834757	0.483418	0.62499	0.670134	0.824428	0.361476	0.466487	0.788199	0.81982	0.934362	0.615884	0.766163	0.953654
CD58	0.394814	0.728111	0.420954	0.445663	0.217674	0.487666	0.319508	0.50731	0.404158	0.354207	0.626133	0.215402	0.732908	0.693452	0.868831	0.63413	0.795289	0.658509	0.0237988
VCAM1	4.20402	4.05983	3.99858	3.98535	4.0283	3.97256	4.1453	4.03381	4.12534	4.04582	4.23677	3.98769	4.09269	4.32477	4.24026	3.93694	3.90449	4.37768	0.567775
NCL	0.837788	0.631805	0.52116	0.603499	0.706964	0.740935	0.71312	0.528984	0.531662	0.596372	0.882779	0.288688	0.744145	0.956535	0.7361	0.878872	0.667816	0.954514	0.365798
HK1	-2.06643	-2.13292	-2.06358	-2.31961	-2.15388	-1.13606	-1.70364	-1.45985	-0.808661	-1.71874	-1.28808	-1.33412	-1.16351	-2.28458	-1.43466	-1.21479	-0.799141	-1.92198	0.320284
CD53	0.22414	0.121177	-0.228456	-0.0968915	-0.160896	-0.333266	-0.243625	0.39591	-0.383173	0.239736	0.70266	-0.39804	0.35064	-0.292	-0.375789	0.0445527	-0.172117	0.212433	0.821299
NDUFV2	-1.33234	-1.76275	-2.48922	-2.1364	-2.25791	-1.7713	-1.80064	-2.7316	-2.17435	-2.14292	-1.80066	-1.30842	-2.22799	-1.9024	-3.13146	-2.07635	-1.79298	-1.40341	0.44786
TNFRSF1A	-1.73599	-1.26251	-1.79102	-1.86706	-1.71648	-1.51462	-1.47964	-1.22194	-1.66781	-1.70175	-1.57401	-1.79956	-1.31947	-1.4226	-1.48855	-2.12577	-1.57559	-1.27867	0.601034
GGT1	2.4094	2.63572	2.31652	2.42828	2.64815	2.39187	2.50345	2.47701	2.52019	2.24941	2.85077	2.5627	2.42111	2.56646	2.43822	2.61078	2.62434	2.76502	0.617988
TRIM21	-2.85394	-2.46078	-1.09813	-2.49779	-2.07962	-2.06674	-2.28678	-2.50261	-2.4657	-2.31036	-2.15917	-2.33677	-2.1849	-2.47673	-1.98023	-2.32655	-2.66058	-2.20563	0.950756
EIF2AK2	-1.17488	-1.52045	-1.92928	-0.788456	-1.98121	-1.86815	-2.1523	-1.28511	-1.85534	-0.843083	-1.32392	-1.87451	-0.596769	-1.99113	-1.08746	-1.40143	-1.87914	-1.48272	0.836291
SRM	-1.12579	-0.748731	-0.569249	-0.960303	-0.743268	-1.16806	-0.904089	-1.06556	-1.15759	-0.860214	-1.02199	-0.856576	-1.14997	-0.954627	-1.02965	-1.12555	-1.24905	-1.12345	0.229677
ORM2	2.57265	2.1626	2.45331	2.53236	2.45992	2.79897	2.70013	2.62902	2.29675	2.74652	2.6663	2.38401	2.37206	3.27871	2.97733	3.18764	2.93472	2.51378	0.3043
AOC1	1.94279e-05	-0.224614	-0.366509	-0.645841	-0.640781	-0.655663	-0.0364422	-0.597908	-0.559495	-0.434768	-0.274167	-0.646193	-0.581395	-0.616236	-0.49042	-0.921044	-0.70446	-1.07299	0.0105211
ITIH2	4.62889	4.89632	4.52231	4.73325	4.65927	4.76128	4.62564	4.81329	4.44738	4.7389	5.15607	4.84864	4.99107	5.00334	5.01538	4.60251	4.88724	4.90314	0.0890041
ITIH1	1.94506	1.74	1.69913	1.84928	2.05295	2.06413	1.96567	1.65862	1.85755	1.79817	2.17554	1.90408	1.64426	2.18287	1.92353	1.87067	1.30884	1.5948	0.245837
CEL	-0.223291	-0.262615	-0.265668	-0.494675	-0.312667	-0.340714	-0.238674	-0.366701	-0.183799	-0.299185	-0.154913	-0.219659	-0.311993	-0.0655819	-0.615453	-0.171897	-0.303239	-0.0604443	0.537824
NFKB1	-1.88183	-1.58944	-1.56943	-2.17019	-2.13035	-2.40848	-2.07445	-2.37244	-1.02687	-0.816293	-1.33886	-2.51494	-2.12813	-1.74688	-2.15403	-1.27341	-0.919247	-1.81368	0.367246
NCF2	-0.0356629	0.0790447	-0.306452	-0.116441	-0.194365	0.0259996	0.214531	-0.0968424	0.118975	0.0137929	0.21518	-0.241905	-0.219562	0.0583328	-0.1155	-0.320142	-0.476853	-0.393593	0.0552301
PI3	-3.02944	-1.62498	-3.00155	-3.02238	-2.05634	-2.62506	-3.03519	-2.97648	-2.99682	-1.11818	-2.10339	-2.30531	-1.64331	-3.01549	-1.05412	-2.7581	-2.54847	-1.88823	0.29456
AMY2B	0.319014	0.680626	-0.306124	0.212055	-0.0591185	0.517801	0.351775	-0.546369	0.0625282	0.129009	1.40823	-0.502847	0.337578	0.724554	0.551936	0.318446	-0.424326	0.451169	0.837284
TYMP	-0.413533	-0.222443	-0.085177	-0.27002	-0.350588	-0.27656	-0.226472	-0.331054	-0.188083	0.304014	-0.113015	-0.222705	-0.113874	0.000699167	0.201112	-0.79973	-0.167632	-0.819846	0.0406903
HLA-DPA1	-1.4662	-2.49488	-2.61236	-2.56066	-2.44599	-2.19282	-1.6331	-2.45941	-2.70595	-3.05634	-1.2305	-1.42316	-1.73911	-2.25122	-1.91414	-2.33465	-2.74535	-3.45371	0.472959
EIF2S2	-0.0826035	-0.160291	0.01497	-0.340292	-0.138077	-0.19881	-0.0289787	0.0168132	-0.113824	-0.164411	-0.303589	-0.295952	-0.400399	-0.0283359	-0.304789	-0.353472	-0.0746247	0.0890192	0.309414
TCN1	-0.0142683	0.156134	-0.289461	-0.367538	-0.172117	0.228802	0.349408	-0.586728	-0.0927519	0.137089	0.0976957	-0.473632	-0.290229	0.451894	-0.31827	0.0587966	-0.450612	0.160378	0.9999
TCN2	-1.22666	-1.36741	-1.99796	-2.22473	-2.33877	-1.26178	-1.37203	-2.05695	-1.50154	-1.25108	-2.29151	-1.68096	-2.51656	-1.47976	-2.29249	-2.79566	-1.22533	-1.24654	0.859629
ANXA7	0.865924	0.608312	0.72705	0.64028	0.761461	0.326682	0.91167	0.496677	0.953097	0.608618	1.04108	0.200319	0.442302	0.879067	0.59133	1.1723	0.843905	0.790633	0.568311
CD33	0.14862	0.6863	-0.145345	0.111319	-0.0664528	0.190589	-0.347118	0.428279	0.146537	0.464064	0.270013	-0.601503	-0.161604	-0.137561	0.0912026	0.0292436	0.175923	0.148858	0.934254
PGC	1.22401	1.45074	0.97913	0.505511	1.39067	0.591227	1.1492	0.608846	0.925071	0.0600058	1.0415	0.497365	0.128531	1.48461	0.438257	1.15284	1.18725	0.72516	0.513185
AZU1	4.33481	3.98829	4.16601	3.79712	4.40878	4.24969	4.39914	4.52292	4.25561	3.4144	5.06511	4.97282	4.89295	3.09826	4.67907	3.80445	4.87104	4.88936	0.953453
ALOX5AP	-0.794301	-0.801391	-0.881812	-0.765793	-0.95282	-0.822887	-0.437925	-0.766868	-0.915615	-0.633854	-0.147281	-0.668554	-0.862571	-0.708659	-0.754132	-0.440082	-0.807222	-0.721925	0.224604
TNFRSF1B	2.09162	2.2934	2.00649	1.79579	2.00917	1.76116	2.0832	2.01439	1.71696	1.82671	1.98876	1.90166	1.90554	2.02859	2.03886	1.6469	1.6056	1.99213	0.119431
RAB4A	-2.5708	-2.72132	-2.70503	-2.73156	-2.79401	-3.03464	-2.83628	-2.79608	-2.71871	-2.88699	-2.82206	-2.68489	-2.00259	-2.85176	-2.72632	-2.70746	-2.03967	-2.81472	0.536907
RAB5A	2.20989	2.27203	2.14758	2.13942	2.10885	2.02695	2.37437	2.01613	2.19022	2.30863	2.34214	1.95913	2.23564	2.2424	2.166	2.12776	2.10042	1.94717	0.521992
RAB6A	0.634422	0.507293	0.351001	0.417702	0.597054	0.352906	0.546765	0.917548	0.890787	0.305487	1.07424	0.668623	0.957061	0.407398	0.921779	0.649633	0.95441	0.0906537	0.650787
PVALB	-2.60619	-0.829635	-0.30888	-1.93543	-1.04017	-3.11694	-4.00624	-1.34088	-3.7481	-0.449583	-1.08491	-1.84268	-3.39866	0.276123	-1.76266	-4.10478	-4.24796	-1.05485	0.38213
MX1	-2.9137	-3.14861	-3.21358	-3.11043	-2.44783	-2.87154	-2.47278	-2.6701	-2.89217	-2.27661	-2.58749	-2.96821	-2.93084	-3.4108	-3.06339	-0.314142	-1.14769	-1.65632	0.000159706
PSMB1	0.896978	0.468418	0.650538	0.42934	0.444351	1.01803	0.705041	1.078	0.744459	0.538649	1.27076	1.33572	0.672893	0.82263	0.766533	1.06509	1.1653	1.12397	0.191742
COX5A	-1.43748	-0.353602	-1.20639	-0.747775	-1.23272	-0.599974	-1.54554	-0.367372	-0.484738	-0.353264	-1.0934	-1.397	-0.768098	-1.45768	-1.33706	-1.30167	-1.65551	-0.594877	0.902818
LMNB1	-1.00723	-1.25217	-1.23322	-0.677842	-0.839539	-0.745935	-0.741026	-0.704725	-1.17914	-0.223312	-0.329513	-1.12405	-1.18735	-0.924684	-1.1599	-0.217286	-0.8686	-0.344309	0.060446
ITGAL	0.467659	0.158894	0.539501	0.420534	-0.342241	0.0860663	0.418819	0.396796	0.201232	0.16476	0.407538	0.0186959	0.465973	0.331785	-0.110836	-0.185992	-0.116288	-0.0913153	0.15315
DDC	0.197275	-0.424336	-0.6472	-2.12082	-0.554785	-0.0545246	0.626263	0.22626	-0.0816931	0.370231	0.632642	0.93117	0.587417	-0.0780407	-0.456836	0.106105	1.18174	-0.221432	0.109767
PZP	2.59891	2.77751	2.5086	2.47362	2.59434	2.60554	2.44372	2.54695	2.54875	2.67849	2.78709	2.53474	2.6243	2.59207	2.562	2.66164	2.54455	2.79655	0.394264
OGN	-1.74499	-1.99432	-1.79542	-2.22004	-1.77305	-1.42353	-2.11537	-1.83147	-1.76795	-1.25625	-1.62025	-1.4861	-1.71852	-1.07442	-1.38356	-1.2212	-1.50239	-1.51517	0.0704284
CAST	1.91005	1.92423	1.72494	1.60376	1.77579	1.72105	1.82839	1.74734	1.89524	1.82326	1.87944	1.52419	1.7665	1.78316	1.74155	1.77858	1.66224	1.67778	0.433699
EFNA1	0.950852	1.03065	1.26782	1.04001	0.860111	0.594232	0.816671	0.874178	0.875753	0.818408	1.18137	1.00524	0.833999	0.322706	0.521922	1.35837	0.861894	1.22432	0.0399988
IMPDH1	2.12475	-1.44798	-1.49528	-1.75688	-1.26156	0.836784	-0.394633	-0.389206	1.3499	0.448925	0.369552	0.465788	-2.07311	-2.0916	-2.24208	-1.07746	-2.37856	-0.351003	0.151008
C4BPB	0.10584	-0.668163	-0.905754	-0.0719231	0.0596396	0.186375	-0.155533	-0.350061	-0.0970964	-0.653928	-0.150769	-0.737789	-0.272908	0.436298	0.0685049	-0.483358	-0.682766	-0.729025	0.0533125
MAG	-4.75939	-4.81421	-3.07505	-3.69866	-2.96791	-3.98522	2.42925	-3.67057	-3.02636	-3.98446	-0.544764	-3.38061	-3.70204	-3.24813	-2.80415	-1.89447	-1.84976	-4.07847	0.491237
NEB	-1.50316	-1.35046	-2.06977	-1.45593	-2.26416	-1.43093	-1.25954	-0.78775	-1.60238	-1.19625	-1.96434	-2.22264	-0.829751	-2.09321	-0.369608	-0.99842	-2.24424	-1.22075	0.639101
FLG	-3.90901	-3.05274	-2.19171	-2.42482	-3.56717	-0.586291	-3.9943	-3.8185	-2.07862	1.06883	-4.53159	-3.45759	-3.98487	-2.2859	-4.22062	1.37234	-2.80593	-2.83845	0.725974
AGA	-1.41231	-2.60196	3.22611	-2.78808	-1.93348	-3.36489	-2.90453	-2.63367	-2.98168	-0.236286	-0.475533	-2.16742	-0.471236	-1.45688	-3.34709	-2.89858	-3.78448	-2.52088	0.209658
RASA1	-2.64517	-2.75549	-2.7142	-2.73618	-2.77399	-2.73624	-2.82544	-2.83839	-2.73282	-2.77071	-2.38929	-2.64253	-2.70475	-2.76865	-2.75713	-2.79534	-2.81724	-2.71351	0.183198
PTMS	-1.5759	-0.97761	-1.80985	-1.68517	-1.61033	-1.73273	-1.63488	-0.901829	-1.79876	-1.47317	-1.5407	-1.82594	-1.20324	-1.7656	-0.12767	-1.57982	-1.31049	-1.24175	0.580568
PRPS1L1	0.994728	0.833276	0.555188	0.810813	0.880952	0.815836	0.978594	0.848669	0.791259	0.59526	1.37465	1.17524	0.509397	0.296336	0.525957	0.421635	0.490107	0.944892	0.0908483
FUT3;FUT6;FUT5	-2.53634	-2.46441	-3.31473	-2.58753	-3.03855	-3.31276	-2.73783	-2.86686	-2.56603	-2.2733	-2.93643	-2.89108	-2.70105	-0.938983	-2.52044	-3.25537	-2.94343	-2.60174	0.334084
GSTM3	-0.842096	-0.842793	-1.47575	-1.38556	-0.731436	-1.42372	-1.0877	-1.1959	-1.08366	-0.664136	-0.931626	-0.895515	-1.49712	-0.96001	-1.25098	-0.659217	-1.07053	-1.13304	0.507223
ATP6V1B2	0.61741	0.738675	0.600343	0.383044	0.844749	0.400233	0.781175	0.478112	0.558648	0.542473	0.761449	0.410783	0.576654	0.192893	0.124276	0.476137	0.0469388	0.412581	0.200457
ATP6V1C1	-1.13347	-1.16497	-1.48662	-1.35422	-1.15247	-0.917302	-1.03708	-1.84553	-1.33177	-1.07599	-0.873447	-1.90243	-1.59536	-1.13533	-1.52258	-1.03875	-1.83746	-1.2404	0.928389
CSRP1	-0.75882	-1.56169	-1.56597	-0.983579	-2.3574	-2.38545	-2.91091	-2.48577	-1.23859	-1.53305	-1.26596	-1.00039	-1.75386	-2.10657	-2.23871	-1.38455	-1.04992	-1.29611	0.15791
FLNA	2.31665	2.38142	2.14081	2.34832	2.20579	2.32212	2.46911	2.25733	2.37738	2.45202	2.30734	2.11353	2.38862	2.32219	2.07795	2.58186	2.50905	2.59613	0.083809
MAOA	-2.44663	-2.43803	-2.5937	-2.82696	-1.28608	-0.477471	-1.52344	-2.42895	-2.54909	-2.3364	-2.25747	-2.31504	-2.20992	-2.65038	-2.36716	-1.14772	-2.00423	-2.34584	0.392611
ACO1	-0.331499	-0.248678	-0.304685	-0.621533	-0.448037	-0.490004	-0.30424	-0.602643	-0.507792	-0.486474	-0.0852191	-0.030587	-0.350932	-0.506233	-0.624146	-0.633982	-0.545902	-0.984143	0.0324628
S1PR1	-2.86623	-3.15648	-2.24487	-2.8876	-2.95371	-1.55926	-3.00039	-3.09024	-3.03482	-3.06214	-1.46064	-3.13062	-2.7032	-2.12321	-1.93188	-2.49752	-2.99935	-2.29435	0.67436
KITLG	0.106353	0.423058	0.0215339	-0.227464	-0.103269	0.0335986	0.0584069	0.182154	0.338258	-0.0571717	-0.229166	-0.115503	-0.549595	0.240704	-0.0271078	-0.461724	-0.617848	-0.384344	0.0182292
NT5E	-1.45765	-1.47485	-1.23149	-1.42983	-1.14464	-1.6637	-2.02179	-1.86929	-1.0673	-1.75601	-0.760019	-2.18277	-1.87301	-1.81562	-2.05765	-1.03638	-1.88397	-1.37807	0.650582
GPD1	0.189443	0.167723	-0.236546	0.136816	0.179368	-0.0480901	0.288771	0.373594	0.189673	0.118233	-0.131429	-0.0254855	-0.35675	-0.593225	-0.326839	-0.0357784	-0.162084	0.133196	0.0027966
EPHA1	-1.54048	-1.76616	-1.57012	-1.4578	-0.678492	-0.628431	-1.00905	-0.954526	-1.70007	-0.840511	-1.44627	-1.46972	-1.23709	-0.488203	-1.08447	-1.87155	-1.38749	-1.07772	0.225125
C5AR1	-3.23476	-0.917469	-2.80149	-2.32904	-2.09567	-2.35637	-2.8001	-0.517105	-2.4371	3.51189	-0.672238	-2.37516	-0.819725	-2.44527	-1.63982	-1.2886	-1.50474	-2.53699	0.398778
MSR1	-2.14858	-1.62072	-0.751336	-0.911993	-1.48185	-0.964012	-2.16455	-1.18017	-1.57509	-1.1588	-1.55474	-1.92045	-2.16936	-3.26959	-2.05226	-2.03132	-2.00346	-1.01035	0.137446
VDAC1	-1.51215	-1.55251	-1.61578	-1.55913	-1.57588	-1.89726	-1.02159	-2.5287	-1.08836	-1.34608	-0.883351	-1.84019	-1.67286	-1.37406	-1.22578	-0.799268	-1.37156	-1.53535	0.851334
FGFR2	-2.33436	-1.00656	-0.998155	-1.90784	-1.84068	-1.92294	-1.58753	-3.31311	-1.65686	-0.832503	-1.79542	-1.77632	-1.91608	-2.0758	-2.30291	-1.20252	-2.68218	-1.4179	0.643046
BGN	1.3446	-2.38798	-1.13494	-2.4547	-2.25355	-2.20875	-1.79169	-2.54997	-0.703925	0.531277	-2.51286	-2.1474	-3.24249	-1.69995	-1.92401	-2.8123	1.61972	-2.94628	0.80546
SDHB	-0.887092	-1.83956	-1.64861	-1.52031	-2.27658	-1.71955	-1.26712	-2.13107	-0.99532	-2.02362	-2.04023	-1.53508	-1.66854	-1.96942	-1.84833	-0.97098	-2.04174	-0.610721	0.487841
CD9	-0.92609	-0.917468	-1.00559	-1.45842	-0.922048	-1.2047	-0.775954	-0.965319	-1.12179	-0.923368	-0.579857	-1.17148	-0.948521	-1.28152	-1.24595	-1.06368	-0.930065	-0.572516	0.34784
COMT	-1.70285	-1.43394	-1.917	-1.45587	-1.26569	-1.47589	-1.70528	-1.36467	-1.39649	-1.481	-1.18642	-2.06154	-1.65539	-1.0966	-1.78699	-1.67862	-2.52747	-1.7666	0.363744
TGM2	0.923627	1.15089	0.627879	0.750348	0.428191	0.654405	0.893157	0.799932	0.86543	0.905178	1.18451	0.746463	0.83086	0.623762	0.882516	0.930759	1.07654	0.778298	0.259444
OSBP	-1.76517	-1.1659	-1.86621	-1.92042	-2.0343	-2.17186	-1.90641	-1.31368	-1.75841	-1.31639	-1.79514	-1.44235	-1.51366	-1.33969	-1.45548	-1.28169	-1.4369	-1.32574	0.0446666
PCMT1	1.4137	1.61069	1.55918	1.55273	1.62988	1.12158	1.34663	1.37603	1.4073	1.5282	1.54307	1.18701	1.04557	1.88323	1.54839	1.7767	0.982804	1.56561	0.98794
FBL	-1.77204	-1.41849	-1.76876	-1.89814	-1.44367	-1.05039	-1.52882	-1.49802	-1.57039	-1.56779	-1.99074	-1.84945	-1.62398	-0.996339	-1.80742	-1.78868	-1.66996	-1.89212	0.518833
GART	-0.1853	-0.412234	-1.29061	-1.19834	-0.943721	-0.594707	-0.570173	-0.344421	-0.618167	-1.06747	-0.329282	-1.15612	-0.322458	-0.651956	-1.38186	-0.494972	-0.552835	-0.874622	0.825145
TNXB	0.75695	0.981269	0.648689	0.78014	0.77723	0.804861	0.739258	0.91117	0.761376	0.77661	0.920032	0.727048	0.826457	0.887598	0.859434	0.772471	0.801118	1.03632	0.898012
CDH3	0.534487	0.674966	0.406445	0.12935	0.276601	0.0216381	0.295102	0.0175082	0.529944	-0.0270498	0.506494	0.302736	0.34718	0.0448866	0.681504	0.248418	0.47013	0.704993	0.375912
PAICS	0.530849	0.686674	0.124735	0.447412	0.478055	0.605854	0.566592	0.244453	0.400995	0.460226	0.716799	0.292504	0.460232	0.588089	0.358316	0.403704	0.332993	0.584823	0.981287
IDS	-1.6471	-2.3216	-2.00304	-2.07606	-1.4175	-1.47455	-1.38207	-2.27816	-1.5489	-1.11564	-0.99525	-1.94352	-1.30979	-0.881486	-1.66866	-1.18893	-1.70058	-1.1542	0.287265
SCP2	-0.880171	-0.6112	-0.865011	-0.602348	-0.637652	-0.971608	-0.928253	-1.06569	-0.740359	-0.630596	-0.841239	-0.982573	-0.900363	-0.404757	-1.23634	-0.822706	-0.880871	-0.586013	0.946159
UBA1	1.4731	1.59695	1.19547	1.2431	1.4456	1.34555	1.36692	1.25594	1.53703	1.3531	1.61299	1.20311	1.265	1.43873	1.32139	1.12533	1.00078	1.25744	0.276941
GPX3	3.65411	3.60667	3.29671	3.51896	3.55447	3.48477	3.65538	3.36538	3.61242	3.71518	3.53845	3.54113	3.65007	4.33988	3.45609	3.5814	3.27128	3.54596	0.526563
NME2	2.82795	2.72706	2.72784	2.73697	2.94238	2.83026	2.65483	2.97938	2.9224	2.7331	3.05935	2.81208	2.80896	2.73856	2.16348	2.5763	2.7088	3.07179	0.55537
SPRR1B	0.00159524	0.309643	0.296531	0.280417	0.313628	0.913654	0.451975	0.213439	0.479694	1.27399	0.682194	0.322908	0.0602715	0.38109	-0.125466	1.01529	0.440562	0.620664	0.123529
SPRR2D;SPRR2B	-3.01258	-2.57123	-2.77169	-2.13033	-2.93833	-2.59916	-2.53918	-2.95909	-2.6087	-0.915397	-2.58062	-2.38825	-2.24314	-2.24539	-2.44353	-2.60375	-2.67313	-3.06467	0.226555
HNRNPA2B1	1.51414	1.35181	1.53437	1.70568	1.57739	1.38279	1.65756	1.51985	1.47727	1.59463	1.66402	1.4345	1.56398	1.47078	1.8043	1.7085	1.55502	1.4391	0.851103
CBL	-1.72375	-1.53221	-1.32889	-1.69148	-1.75005	-1.72125	-1.86468	-1.64201	-1.73345	-2.27094	-1.59304	-1.58264	-1.67274	-2.20131	-2.09194	-1.77598	-1.87053	-1.29696	0.388238
IGFBP4	-0.251938	-0.806634	-0.61206	-0.543095	-0.769924	-0.564022	-0.268261	-0.87984	-0.346006	-0.606828	-1.12376	-0.645778	-0.371451	-0.772111	-0.661325	-0.920892	-0.477444	-0.763929	0.737806
UQCRC2	-2.95102	-2.89377	-2.9453	-2.81968	-2.94784	-2.94444	-2.93261	-2.93737	-2.45055	-2.45802	-2.54901	-2.98501	-2.86221	-2.91495	-2.95782	-2.15961	-2.88457	-2.9442	0.579667
SLC2A5	-0.0753344	-0.111457	-0.916297	-0.378601	-0.521994	-1.09856	-0.204421	-0.229506	-0.47799	-0.480676	-0.245616	-0.862886	-0.0258517	-0.211736	-1.01578	-0.422839	-0.0790467	-0.342531	0.781408
TGM1	0.749741	0.688644	0.403349	0.708955	0.207467	1.06371	1.15259	0.472107	0.589641	1.06862	0.541376	0.365819	0.225222	0.680579	0.498588	0.567463	0.351674	2.11357	0.839993
CA4	-1.44197	-1.13049	-1.3498	-1.19218	-2.04635	-1.26173	-1.52368	-1.21893	-1.08985	-1.23321	-1.36096	-1.60201	-1.30046	-1.058	-1.368	-1.24558	-1.43057	-1.16256	0.808883
CPN2	3.81584	3.70031	3.57774	3.81733	3.81929	3.91993	3.81507	3.58198	3.85616	3.73718	4.07982	3.73294	3.88528	3.88688	3.77251	3.7572	3.73675	3.87418	0.553712
EVI2A	-3.21646	-4.16767	-4.05612	-4.21031	-4.05726	-4.17477	-3.9659	-4.14983	-3.91078	-3.97473	-4.15426	-4.30908	-4.08682	-4.10015	-4.04971	-4.22082	-4.14881	-3.29975	0.710282
PROZ	0.647726	0.762247	0.461437	0.372134	0.470147	0.484456	0.669673	0.51379	0.517774	0.605545	0.39502	0.265718	0.327101	0.688512	0.512101	0.394962	0.480785	0.43209	0.357878
MMP8	3.79496	3.78428	3.53366	3.46922	3.68773	3.7058	3.67331	3.35006	3.60325	3.6526	3.95651	3.52434	3.59753	3.85615	3.46991	3.70557	3.43092	3.93504	0.877983
MRC1	0.0818373	0.371373	-0.0569242	0.135374	0.026977	0.204322	0.151027	0.289791	-0.0883941	0.0177946	0.13923	-0.205977	-0.0649379	0.182349	-0.16745	-0.33944	-0.151281	0.256597	0.700002
IGHV1-2	1.88675	2.14897	2.07688	2.18753	2.00856	2.25363	2.27311	2.18269	2.32962	2.58704	2.58872	2.45202	2.24601	2.74402	2.15228	2.71029	2.49323	2.60878	0.00705101
CES1	-0.712038	-0.661372	-0.0845046	-1.07065	-0.667166	-0.649943	-1.1189	-0.300081	-0.484352	-0.952322	-0.377317	-1.59715	-1.40261	-2.12134	-0.967113	-1.04662	-0.894777	-0.860088	0.144415
FBLN1	2.68943	2.83926	2.47565	2.5733	2.63659	2.71768	2.66563	2.85555	2.74198	2.74266	2.8308	2.72113	2.89432	2.746	2.6558	2.78229	2.69367	2.76288	0.587175
SFPQ	-0.025275	-0.27598	-0.146977	-0.427781	-0.382299	-0.114581	-0.228608	-0.305075	-0.0800638	0.111279	-0.0391373	-0.653139	0.0437175	0.0633471	0.0221378	0.0662351	-0.0558005	-0.210953	0.407248
PPIB	1.45422	1.93329	1.42151	1.51634	1.47604	1.41076	1.21673	1.50775	1.37469	1.49648	2.07395	1.40007	1.29113	1.9053	0.805363	1.43738	1.66579	1.86112	0.673964
S100A1	-1.71721	-2.21018	-1.56724	-2.28801	-2.21097	-1.7453	-2.55352	-1.09905	-1.62586	0.829724	-2.625	-2.01704	-2.21511	-1.96697	-1.97455	-1.79461	-2.3303	-1.70099	0.858038
HRC	-2.6102	-1.91593	-2.2863	-2.424	-1.69942	-2.48826	-2.43321	-1.86311	-2.40614	-1.40657	-0.843103	-2.49238	-2.19535	-2.36477	-1.8011	-1.91548	-2.52123	-1.64753	0.544087
ME2	-1.32464	-1.42262	-1.80567	-1.60636	-1.20353	-1.16052	-0.942621	-1.46537	-1.12662	-1.23242	-1.22362	-0.579279	-1.01938	-0.967766	-1.533	-1.2734	-0.904396	-1.02961	0.327643
WARS1	-0.336398	0.180627	-0.298641	-0.290401	-0.294257	-0.012909	-0.183041	-0.398107	0.205203	-0.39356	0.22919	-0.0644556	-0.330956	-0.670253	-0.371413	-0.0365805	-0.19365	0.0799715	0.405207
RPS3	1.20116	1.31106	1.08542	1.5503	1.44148	1.28782	1.40648	1.48755	1.30994	1.19708	1.28855	1.35514	1.20709	1.25503	1.19903	0.929692	1.01002	1.22521	0.0104549
GCSH	-0.34427	0.333569	-0.152092	-0.039172	-0.109156	-0.0811321	-0.0363819	-0.291723	0.184779	-0.362273	0.332574	0.0413934	0.107553	0.407972	0.593175	0.114708	0.475094	0.211493	0.217459
PTPRG	2.56471	2.83089	2.5437	2.61484	2.57577	2.58089	2.6824	2.5102	2.67314	2.56327	2.7047	2.15645	2.47822	2.81799	2.53242	2.74358	2.49545	2.63919	0.830173
PTPRZ1	-2.01212	-2.03846	-2.09234	-2.12301	-2.11566	-2.17739	-1.78207	-1.91995	-1.9739	-2.19891	-2.12082	-2.053	-1.95684	-2.05153	-2.05347	-2.08118	-1.69498	-1.64434	0.0233117
SP100	-1.97186	-0.481618	-2.0155	-2.13175	-0.297142	-1.62244	-2.57083	-1.70913	-1.72557	-2.081	-2.14951	-2.16268	-2.09885	-0.797625	-1.87178	-2.0263	-2.1096	-1.05478	0.701397
AHCY	2.37939	2.3596	2.33247	2.35425	2.15188	2.23919	2.29749	2.4512	2.42737	2.34513	2.58469	2.4383	2.31525	2.33809	2.45046	2.07733	2.05235	2.26455	0.0122152
CFL1	4.19098	3.74634	4.08204	4.20055	4.12262	4.1338	3.95266	4.12436	3.87324	3.64379	4.44086	4.30138	4.08381	3.72755	4.23463	3.72823	3.76988	3.88132	0.51031
EIF4B	-0.630901	-0.162058	-0.964219	-0.639409	-0.657421	-0.0347695	-0.254552	-0.313032	-0.87053	-0.447623	-0.58933	-0.896012	-0.0881693	-0.366877	-0.142589	-0.431617	-0.657393	-0.155054	0.569745
DTYMK	-2.12984	-1.32767	-2.46969	-2.1951	-1.54256	-1.87163	-1.93192	-2.39743	-2.41685	-1.66118	-1.66691	-2.88256	-2.20936	-1.35292	-1.23353	-2.2842	-1.37504	-2.44421	0.751517
LAMA2	-1.28858	-1.22062	-1.4963	-1.4592	-1.47022	-2.57178	-1.60809	-2.1318	-2.30651	-1.71889	-1.63993	-2.01395	-2.53594	-2.06555	-1.51884	-1.57455	-1.8463	-1.01242	0.286474
FCAR	-1.1819	-1.21666	-1.50579	-0.832779	-1.40072	-1.28657	-0.890802	-1.14886	-0.839016	-1.73827	-1.32749	-1.0269	-1.10814	-1.60444	-0.84533	-1.16414	-0.717835	-1.36139	0.619834
PRTN3	4.92717	5.1141	4.4631	4.78454	4.88714	4.96965	4.8367	4.83039	4.75822	4.89685	5.14583	5.00555	5.16695	5.22978	4.81304	4.6081	4.93138	4.91363	0.455194
GPT	0.118464	0.400556	-0.201786	0.0392101	0.588555	0.195825	0.217489	-0.066089	0.291795	0.303377	0.264182	0.0107014	0.199541	0.797515	-0.239628	0.242807	-0.504738	0.15206	0.874854
MMP11	-1.72652	-1.92537	-1.32915	-1.90967	-1.43569	-1.92827	-1.91712	-1.47499	-1.78435	-1.80354	-1.89142	-1.8945	-1.71306	-1.86214	-1.82127	-1.95888	-1.95149	-1.92998	0.562994
CRHBP	-1.25067	-0.97699	-1.85315	-1.77556	-1.36292	-1.34003	-1.79468	-1.23566	-0.934267	-0.894253	-1.15444	-1.47413	-1.0811	-1.13451	-1.64333	-1.08893	-1.43501	-0.838311	0.809549
EDNRB	-0.974133	-1.31326	-2.15658	-2.43144	-1.69922	-2.05115	-0.562132	-0.709828	-1.50595	-1.66904	-1.02128	-0.833663	-2.00675	-1.9843	-0.933893	-1.83505	-0.958691	-1.72977	0.195478
EEF1B2	0.0305104	0.244782	0.00626062	0.212429	0.148058	0.059778	-0.299019	-0.589749	0.356565	0.248947	0.387729	0.0521761	-0.33597	-0.126294	0.163626	-0.142518	-0.668796	-0.0829784	0.218014
IGFBP6	-0.571268	-0.900764	-0.743732	-1.0951	-0.536816	-0.689011	-1.08179	-0.516356	-0.439418	-0.539523	-0.760034	-0.757658	-0.20484	-0.695746	-0.586621	-1.06033	-0.73154	-0.68553	0.663812
IGFBP5	-3.5922	-3.59165	-3.79656	-3.33987	-2.54718	-3.75156	-3.90936	-3.36173	-3.87985	-2.88596	-3.97044	-3.97448	-4.07049	-2.10925	-1.85407	-2.90558	-3.77641	-3.44616	0.416645
ACP1	2.25311	2.35029	1.87983	1.97709	2.18565	1.93696	2.00236	1.67354	2.16819	1.74938	2.08	1.53971	1.59842	1.88357	1.85939	1.92907	1.84885	2.25303	0.302492
ACAT1	-0.329548	-2.01841	-0.616914	-0.756267	-1.84696	-1.68682	-2.10568	-0.967266	-1.28922	-1.39138	-1.36068	-1.35208	-1.33334	-0.638755	-1.49389	-1.01663	-2.25622	-2.32812	0.623541
TNC	-0.568807	-0.383361	-0.461377	-0.570547	-0.558255	-0.550191	-0.713698	-0.49041	-0.314404	-0.565702	-0.634081	-0.697201	-0.565806	-0.499681	-0.714356	-0.554169	-0.657113	-0.53452	0.506764
DNASE1	3.33835	3.3621	3.17862	3.11868	3.25599	3.25335	3.49316	3.22352	3.22888	3.31393	3.46988	3.08465	3.37971	3.52501	3.49968	3.37753	3.3112	3.57269	0.236271
CXCR1	-0.72883	-0.763259	-0.229928	-0.983196	-0.689836	-0.785035	-0.929919	-0.848108	-0.610648	-0.214202	-0.083375	-0.715304	-0.553418	-0.750036	-0.947436	-0.740043	-0.694149	-0.711534	0.140493
GRK2	-1.13804	-0.684112	-1.58394	-1.08686	-1.89301	-1.34123	-1.19312	-1.49922	-1.46465	-0.799307	-1.18025	-1.57861	-1.24487	-1.11059	-1.75541	-0.873151	-1.55175	-1.57477	0.893487
F2R	-1.92264	-2.03195	-1.83286	-2.06851	-1.79507	-1.99316	-2.09928	-1.23208	-2.08148	-1.10098	-2.01599	-1.32922	-1.19705	-1.97038	-1.75039	-1.9675	-1.93662	-1.9599	0.439776
MCM3	-2.68517	-0.637883	-1.71357	-1.0184	-2.23021	-1.9273	-2.24539	-2.54517	-0.665424	-0.801421	-0.604796	-2.16757	-2.34647	-2.12697	-2.23275	-2.24441	-2.43354	-0.860978	0.75787
AZGP1	5.56886	6.09544	6.24348	6.18353	6.40344	6.47115	6.1115	6.37039	6.57304	6.25127	6.40291	6.38274	6.11442	6.2971	6.13586	6.22522	6.63494	6.04903	0.30761
MPST	0.912445	0.522049	0.838166	0.884754	1.05634	0.912005	1.10803	0.944661	0.998758	0.452235	1.02656	0.824419	0.425616	1.12632	0.98057	1.22949	0.748559	0.696015	0.760205
LAMA1	1.97138	2.00636	1.88434	2.34016	1.87906	1.99722	2.12266	2.48216	2.11487	1.69954	2.17632	1.66433	1.60123	1.56086	1.55157	1.44038	1.21056	2.71779	0.387867
RPS12	0.174943	0.673183	0.33225	0.462378	0.294639	0.335159	0.278438	0.522224	0.179617	0.256123	0.344929	-0.219137	0.319689	0.187951	0.316024	0.378365	0.339817	0.30598	0.564033
DNAJB1	-0.444774	-0.358029	-0.827581	-0.581278	-0.590493	-0.874499	-0.380631	-0.966972	-0.470837	-0.624664	-0.373097	-0.934366	-0.732936	-0.461978	-0.737775	-0.565704	-0.841738	-0.31876	0.98287
ATP5F1A	0.13022	-0.294668	-0.650569	-0.301938	-0.626867	-0.441432	0.399436	0.0481396	-0.354983	0.180738	0.456485	-0.451804	-0.524943	-0.117249	-0.112952	0.760076	-0.186104	-0.0451965	0.345403
CTSS	1.0239	1.48707	1.13058	1.22248	1.25145	1.3671	1.09843	1.32081	1.11493	1.08405	1.77299	1.17185	1.45377	0.803338	1.48845	1.18126	1.39829	1.77573	0.850678
PSMA1	1.94466	2.54132	1.98359	2.15061	2.12394	2.07292	1.8179	2.23976	2.06356	2.29997	2.75957	2.10944	2.41678	2.11803	2.24166	2.11303	2.25423	2.69201	0.515401
PSMA2	1.31915	0.666148	0.451075	1.25647	1.45986	1.42524	0.977483	0.625038	0.534889	1.1261	1.34034	0.778011	0.895903	0.91398	1.03249	1.35751	0.196128	1.29556	0.345462
PSMA3	1.6877	1.89032	1.76148	1.62393	1.78918	1.6994	1.62181	1.66892	1.65185	1.97078	1.77411	1.47547	1.7074	1.93905	1.96361	1.89097	1.71359	2.12276	0.344577
PSMA4	0.894873	1.24282	0.966715	1.3776	1.39195	1.2919	1.60183	1.37047	0.853167	1.1743	1.73688	1.61848	1.36355	1.29133	1.85015	1.52718	1.65998	1.2606	0.25682
S100P	4.63186	4.60472	4.69088	4.68822	4.89594	4.34611	4.67561	4.61529	4.86602	4.46141	4.68141	4.33093	4.68829	4.87338	4.68656	4.80769	4.78711	5.21873	0.153216
COL5A3	-1.52587	-0.506075	-1.71969	-1.02988	-0.697009	-0.924739	-1.3982	-1.05883	-0.979254	-1.10923	-1.02965	-0.835765	-1.61458	-0.826666	-0.628189	-1.12878	-1.169	-0.882889	0.869777
CD40	0.69803	0.418415	0.603674	0.475147	0.614287	0.639552	0.236732	0.322335	0.299825	0.641164	0.431476	0.480423	0.734457	0.498571	0.714697	0.354756	0.335555	0.292584	0.00385333
PTX3	-0.983325	-0.489664	-0.7722	-0.6983	-0.443677	-0.344205	-0.0156671	-1.08568	-0.200161	-1.08167	-0.756479	-1.02798	-0.572742	-0.339245	-0.686473	-0.463552	-0.691908	-0.287036	0.28961
MSN	2.1932	2.27898	2.24737	2.20898	2.23599	2.17984	2.24172	2.25869	2.16776	2.22551	2.25919	2.0901	2.22017	2.44263	2.13171	2.16628	2.08631	2.1072	0.403887
DDX6	-0.704815	-0.390049	-0.423285	-0.585505	-0.432845	-0.442957	-0.501886	-0.651242	-0.517985	-0.477373	-0.516154	-0.716634	-0.501132	-0.85697	-0.847883	-0.813214	-0.402087	-0.616532	0.46076
U2AF2	0.737991	0.701155	0.666224	0.684569	0.410812	0.946091	1.0059	0.739735	0.789061	0.788389	0.899586	0.592451	0.677027	0.655218	0.665172	0.807389	0.604634	1.07249	0.69146
RPL13	-1.2514	-0.260993	-1.75309	-0.589792	-0.276946	-0.468448	-1.4171	-0.057379	-1.34767	-0.248641	-0.405431	-1.19129	-0.284924	-0.612082	-0.846458	0.368173	-0.149811	0.530257	0.10015
IVD	2.72297	2.95807	2.57929	4.70486	2.87401	3.82643	4.4148	4.98017	3.03495	3.44812	3.88772	5.88074	2.39904	3.68236	3.23565	3.83411	2.8085	4.32431	0.254542
S100A4	4.07781	4.03437	3.87464	4.15746	3.97193	3.91946	4.09414	3.94073	4.15339	3.6588	4.09758	3.81796	3.82612	4.28366	3.78344	3.94959	3.85582	4.16798	0.80886
MGAT1	-1.24222	-1.26365	-1.33063	-1.5644	-1.0171	-0.85998	-1.81108	-1.37854	-0.976225	-0.893249	-1.23737	-1.17349	-1.12145	-1.60757	-0.696101	-1.11693	-1.61249	-0.883616	0.905685
HMGB2	1.54089	2.02886	1.95236	1.57125	2.23031	1.57595	1.46215	1.94396	1.68405	1.6975	1.84628	1.7157	1.49662	1.56991	2.34822	1.80781	2.29318	2.19718	0.683796
PTBP1	-0.934199	-0.493712	-0.97936	-0.855354	-0.752837	-0.685323	-0.636872	-0.921431	-0.825065	-0.780935	-0.489256	-0.795698	-1.25486	-0.742852	-1.11879	-0.629914	-0.46499	-0.669673	0.164802
TARS1	-1.42088	-0.76918	-0.942599	-0.724656	-1.51896	-2.12924	-1.37197	-0.188195	-1.53067	-1.34401	-1.11837	-1.02193	-0.277375	-1.63111	-0.649493	-1.26942	-1.42507	-1.34547	0.7477
VARS1	-1.19394	-0.714352	-1.88487	-1.03985	-1.51115	-1.115	-1.25326	-1.35341	-1.1974	-1.10184	-1.25912	-1.14868	-1.42509	-1.61436	-1.16917	-1.17835	-1.48694	-0.966042	0.949156
EEF1G	-0.0674784	0.118854	-0.135285	-0.0815391	0.0273108	0.00861653	0.0307255	0.0167235	-0.034466	0.0518872	-0.0659649	-0.461479	-0.0803436	0.0799749	-0.317814	-0.0737744	-0.356224	-0.282186	0.437744
KLRK1	-0.321363	-0.13913	-0.434084	-0.586277	-0.291644	-0.320396	0.137257	-0.502681	-0.394172	-0.251632	-0.379783	-0.0974185	-0.129801	-0.627575	-0.493628	-0.381401	-0.060439	-0.429205	0.880502
CD27	2.38439	2.45958	2.4471	2.58214	2.80871	2.24858	2.42369	2.62093	2.77435	2.4273	2.50012	2.46181	2.23122	3.01896	2.83381	2.93203	2.65376	2.21752	0.825144
FKBP2	0.777664	0.76711	0.097066	0.356842	0.745826	0.575378	0.925687	0.230863	0.528851	0.789511	0.559083	0.552193	0.303302	0.971301	0.167577	0.624823	0.590294	1.49722	0.756989
MST1	1.44544	1.66298	1.29147	1.55992	1.67758	1.49848	1.44552	1.4909	1.59541	1.39961	1.70674	1.34722	1.5403	1.58293	1.30443	1.50237	1.48679	1.58515	0.917968
CNTFR	-0.415477	-0.734461	-0.669979	-0.677264	-0.352797	-0.272353	-0.694963	-0.799697	-0.918061	-0.165871	-0.355924	-0.842808	-0.54698	-0.28544	-0.72052	-0.55079	0.00417117	-0.402089	0.260956
STOM	0.534876	0.392394	0.232318	0.00668282	0.175101	0.202375	0.720275	-0.270566	0.496272	0.504641	1.08494	-0.0277383	-0.171245	0.364671	0.868811	0.72819	0.444979	0.549859	0.770097
PON1	3.86705	3.84911	3.73888	3.72275	3.79348	3.78086	4.01043	3.6726	3.84575	3.39898	4.08586	3.90664	3.84654	3.502	4.05571	3.60714	3.72444	3.85208	0.986432
YWHAQ	0.589098	0.654094	0.703117	0.588734	0.800121	0.475832	0.760412	1.06572	0.653624	0.763363	1.12558	0.563505	0.304659	0.190392	0.509158	0.718694	0.106616	1.02442	0.280293
MAPK3	0.82124	1.23759	0.883629	0.648248	0.50151	0.995349	1.04618	1.31578	1.02155	0.933445	1.05258	0.729145	0.877031	0.99793	0.280456	1.05558	0.736079	1.10593	0.321734
CALML3	3.2692	3.45228	3.24389	3.37646	3.43045	3.29085	3.52513	3.25949	3.11448	4.56593	3.4671	3.03261	3.40755	3.38151	3.19949	3.25473	3.39245	3.45778	0.742691
DPP4	3.04407	3.11326	2.87908	2.94886	2.9325	2.96604	3.07203	2.99622	3.09057	2.92566	3.11452	3.07655	3.18679	3.01941	2.9708	3.15518	3.05708	3.14035	0.324638
RPL10	-1.51702	-2.52951	-2.19605	-1.42661	-1.22829	-1.15741	-0.874721	-1.35221	-2.03208	-1.06945	-0.810577	-1.03743	-1.02534	-2.07119	-2.2765	-1.20984	-1.34074	-1.33643	0.080725
RPA1	0.122608	-0.0589151	-0.0290767	-0.170265	0.1058	-0.159391	-0.538897	0.275597	-0.741905	-0.363225	-0.254007	-0.212323	0.0244548	-0.383947	-0.484793	0.312231	0.0786375	0.386409	0.124399
APEX1	1.52268	1.60754	1.66187	1.36935	1.63588	1.55919	1.55555	1.74154	1.4445	1.52322	1.75735	1.37505	1.45151	1.52499	1.1957	1.58694	1.45683	1.8684	0.544286
CALR	2.12317	2.25299	2.03174	2.02135	1.96245	2.10532	2.21711	2.21913	2.10658	2.10938	2.21651	1.97261	2.11242	1.91019	2.10106	2.09423	2.04667	2.20907	0.432121
MAP4	0.408398	0.836584	0.781574	0.7398	0.394119	0.845802	0.185707	0.507613	0.698737	0.642097	0.669275	0.295805	0.492723	0.39921	0.540222	0.581926	0.513588	0.957291	0.656942
CANX	-0.128553	0.00184305	-0.605128	-0.162689	-0.240457	-0.356217	0.161094	-0.221514	-0.273907	-0.105212	0.252712	-0.411196	-0.0373218	-0.0938181	0.277216	0.147326	-0.185019	0.0608889	0.567108
CFP	0.27177	0.900086	0.376308	0.327798	0.703006	0.205396	0.184874	0.787787	0.393795	0.444279	0.639022	0.377465	0.515962	0.416638	0.29006	0.413224	0.731301	0.613353	0.931923
IL1R2	-3.62294	-1.96005	-2.20607	-2.34948	-1.9454	-1.66494	-2.08499	-1.94405	-2.07943	-2.30699	-1.48312	-2.09546	-2.28285	-2.15791	-1.00251	-2.53042	-2.28538	-0.736785	0.721791
PSMB8	-0.851249	-0.501815	-0.366604	-0.599097	-0.741541	-0.648896	-0.907286	-0.181119	-0.214402	-0.503209	-0.31402	-0.780288	-0.561084	-0.571732	-0.452049	-0.624822	-0.475047	-0.450357	0.883042
PSMB9	-0.421354	-0.528473	-0.598609	-0.313649	-0.467506	-1.12934	-0.361569	-0.499718	-0.289879	-0.326536	-0.63267	-0.541945	-0.501889	-0.192559	-0.415295	-0.139651	-0.271215	-0.0222635	0.172121
PSMA5	-0.0128834	0.0630257	0.173803	-0.012239	0.0337014	-0.0512388	0.280956	-0.043472	-0.168259	0.140395	-0.0730126	-0.252629	0.0978023	0.38394	0.21843	0.286128	0.611964	-0.357163	0.677054
PSMB4	-0.254156	0.252477	-0.114769	-0.384918	-0.105261	-0.0917529	-0.180876	0.43961	-0.149924	0.0528308	0.194565	0.304245	-0.187544	0.148826	-0.119339	-0.431512	-0.103727	0.152856	0.51627
PSMB6	1.90014	2.12147	1.76126	1.97203	2.08609	1.95524	2.07437	2.15771	2.07528	2.03772	2.23859	2.04022	2.10204	1.9372	2.08049	1.96988	2.10381	2.23069	0.378559
PSMB5	-0.0386303	-0.0766403	0.159635	-0.257581	-0.0188205	-0.0875764	-0.1865	0.0085815	-0.0349183	-0.135727	0.258722	-0.0669986	-0.163679	-0.0490698	-0.0689199	0.247195	-0.0693884	0.475911	0.216344
GSTM2	-0.375281	0.103959	-0.50788	-0.416517	-0.322865	-0.266131	-0.551075	-0.350561	0.0841986	0.0976903	0.164303	-0.154091	-0.279008	-0.410376	-0.538143	-0.531527	-0.385057	0.109575	0.403304
TMOD1	-0.165426	0.265947	-0.122744	-0.10964	-0.0676017	0.0275833	-0.195359	-0.00935297	-0.158946	0.216255	0.35035	-0.13214	0.119778	0.475752	-0.0170379	0.439544	0.0605579	0.425351	0.154471
LOX	-1.43215	0.679985	-1.46271	-0.0824201	-1.10255	-0.0625105	0.239617	0.9399	-0.551597	0.501489	0.617112	1.33833	1.28137	-0.482044	1.62206	-0.143177	1.33848	-0.308774	0.251458
NDUFS1	-2.73036	-1.62158	-3.19268	-3.05529	-3.03003	-2.72427	-2.2799	-2.76857	-2.97481	-2.86743	-3.04415	-2.76773	-2.77677	-2.96613	-1.988	-2.81482	-2.83548	-2.7449	0.785933
ADH6	-4.10671	-4.71957	-4.40241	-4.45659	-4.69127	-4.78644	-4.54866	-4.67579	-2.95124	-4.75145	-4.75922	-4.67469	-4.52497	-4.05261	-4.37821	-4.80763	-5.05301	-4.30072	0.44816
MAPK1	-0.208307	0.122456	-0.130093	0.166065	0.0802513	-0.103221	0.384062	0.171401	-0.094594	-0.126932	0.238438	0.841394	0.0401116	-0.420856	-0.0691343	-0.48499	0.106606	-0.0730483	0.341809
GCA	1.90739	2.38888	1.8727	1.99817	2.15268	1.87427	2.25994	2.0096	2.07755	1.72645	2.36643	1.93274	1.93831	2.09868	1.71722	1.81444	1.82673	2.0824	0.838646
GRN	1.68832	1.99162	1.79674	1.7154	2.02374	2.03895	1.98017	2.18579	2.21538	1.59981	1.94638	1.86452	1.66769	1.63734	2.23145	1.77987	1.76042	2.15658	0.489952
PTPRM	-2.07864	-0.55582	-1.9202	-1.28768	-1.92128	-0.787122	-0.94817	-1.85843	-1.29228	-0.4903	-1.60003	-0.950298	-1.22296	-1.05795	-0.985823	0.837246	-1.53292	-1.68597	0.865529
LAP3	-0.281429	-0.42667	-0.272766	-0.467242	-0.394922	-0.435357	-0.42697	-0.405073	-0.234271	-0.497697	-0.246668	-1.07359	-0.861662	-0.325818	-0.563995	-0.626678	-0.972	-0.443411	0.403782
CD38	-2.04053	-1.88466	-1.10669	-1.90453	-1.803	-1.87325	-1.44999	-2.09019	-1.18234	-1.98294	-0.457633	-1.58671	-1.32811	-2.17011	-1.78136	-0.977059	-2.06766	-1.56016	0.851746
S100A2	0.767175	0.962332	0.815465	1.05696	1.054	0.820926	0.745387	1.24628	1.09559	0.750332	0.892389	0.781548	-0.0732838	0.83223	0.765533	1.05392	0.684786	0.857186	0.24967
TPP2	-1.89845	-1.45668	-1.71132	-1.30821	-2.16361	-1.87317	-1.44983	-1.33159	-1.58583	-1.49999	-1.46496	-1.82214	-1.6654	-1.88446	-1.61046	-2.2761	-1.67825	-1.97935	0.298334
IMPA1	-0.306419	-0.0746081	-0.426273	-0.292184	-0.376689	-0.356101	-0.0971142	-0.175633	-0.207407	-0.438179	0.122126	-0.206822	-0.229338	-0.520522	-0.297413	-0.139835	-0.0541393	-0.135607	0.333997
CCN2	0.738581	0.826538	0.6378	0.670149	0.936338	0.597837	0.722895	0.668375	0.890634	0.509279	1.05996	0.61911	0.714708	0.589342	0.813404	0.480767	1.05609	0.855635	0.994835
EPHA2	0.0202161	1.61858	0.49848	0.849228	1.95997	0.42741	1.62738	1.61547	0.845625	1.5693	0.423181	1.28987	0.625295	0.683215	0.112293	0.526036	0.317685	0.241029	0.289254
EPHB2	-1.02266	-0.901355	-1.02039	-1.37846	-1.38941	-1.03438	-0.865682	-1.30283	-0.923337	-0.996327	-1.14537	-1.71133	-1.21045	-0.804246	-1.14714	-0.832586	-0.742172	-0.798087	0.134233
PTPN6	-1.70254	-1.81652	-1.47248	-1.50379	-1.5385	-2.04318	-1.68583	-1.31947	-2.12753	-1.83651	-1.40314	-1.64976	-2.17859	-1.84807	-1.71989	-1.15507	-1.92871	-1.30062	0.639399
SHC1	-4.97962	-4.38676	-5.74977	-5.3483	-5.00204	-5.91531	-5.15367	-3.88067	-5.2856	-5.3273	-2.08872	-5.29724	-5.10588	-5.52584	-4.81404	-4.89919	-3.57558	-5.15228	0.703581
CRABP2	0.126373	0.272282	0.0376103	0.145266	0.0699725	0.107939	-0.0517262	0.114277	-0.045642	0.387056	0.137944	-0.388872	-0.00850024	0.130254	-0.0175127	0.121539	0.42833	0.226497	0.610067
COL4A5	-1.91205	-1.68633	-2.75888	-1.76628	-3.02471	-0.800818	-2.58391	-2.62246	-2.54144	-2.14216	-1.85458	-2.43666	-2.97075	-1.24671	-2.32151	-0.669687	-1.77268	-2.09644	0.588484
TKT	1.73962	1.98545	1.71873	1.71112	1.77946	1.7391	1.77202	1.66761	1.7345	1.79974	2.03791	1.68889	1.71435	1.87209	1.5442	1.88595	1.44102	1.82325	0.843932
CASP1	-0.499506	-0.700527	-0.657957	-0.572701	-0.514114	-0.531209	-0.435394	-0.575109	-0.743955	-0.58236	-0.361415	-0.54556	-0.924017	-0.136364	-0.666071	-0.70506	-0.428089	-0.366939	0.965348
SERPINB3	1.66518	1.76014	1.51755	1.55444	1.47424	1.62578	1.455	1.51922	1.69123	5.5696	1.77532	1.60938	1.70144	1.53183	1.09209	2.31093	1.494	2.04164	0.393283
LMOD1	-2.67035	-2.73855	-2.74385	-2.72141	-2.69609	-2.62039	-2.72113	-2.70648	-2.69168	-2.72812	-2.72485	-2.72434	-2.52362	-2.65305	-2.69973	-2.7077	-2.73381	-2.70259	0.165438
PML	-1.66805	-1.92495	-1.91873	-1.58441	-1.72901	-2.03571	-2.14853	-1.85892	-0.756522	-2.18791	-1.80203	-2.00027	-1.67484	-1.97873	-2.10895	-1.41347	-2.02532	-2.12475	0.830724
SERPINA4	2.35912	2.35963	2.27784	2.3033	2.4525	2.33102	2.34185	2.33467	2.52435	2.09775	2.66931	2.44978	2.33305	2.28091	2.14051	2.04474	1.94234	2.29806	0.204239
EEF1D	-0.49979	-0.289289	-0.629431	-0.731862	-0.557195	-0.526178	-0.325922	-0.467433	-0.449585	-0.300331	-0.457284	-0.595454	-0.445327	-0.647722	0.0717493	-0.196495	-0.512463	-0.589329	0.737591
MARCKS	1.27038	1.53073	1.10623	1.57354	1.09439	1.54792	1.43017	1.40753	1.40396	1.43519	1.47448	1.35912	1.39498	1.27402	1.53534	1.32978	1.06527	1.8492	0.984397
AQP1	-1.65514	-1.214	-2.53666	-2.17089	-2.1282	-2.08931	-1.6695	-2.15704	-2.29775	-2.25572	-1.13518	-3.0345	-1.62701	-1.03681	-1.12257	-1.94305	-1.57499	-1.31735	0.329171
GNA11	-0.411295	-0.385723	-0.161841	-0.424753	0.538952	-0.679914	-0.482302	-0.268421	-0.428471	-0.448214	-0.540443	0.232396	-0.700331	-1.1465	-0.275248	-0.0404703	-0.549817	-0.345481	0.644898
ALDH4A1	-1.35389	-1.66202	-2.12354	-1.5382	-1.34987	-1.54161	-1.24319	-1.51413	-1.6244	-1.29432	-1.00964	-1.4117	-1.34721	-1.33264	-1.40081	-1.46822	-1.1741	-1.71123	0.293709
PBLD	-0.515781	-0.89755	-0.917331	-1.03455	-0.909827	-0.961586	-0.997563	-0.880883	-0.985804	-0.86372	-0.447326	-1.23751	-1.19171	-0.697873	-1.52198	-0.752989	-1.52842	-0.58603	0.825161
ERP29	1.42005	1.80889	1.37229	1.44462	1.51349	1.22709	1.47075	1.43343	1.38145	1.36791	1.58067	1.28367	1.3786	1.51786	1.3818	1.71619	1.52811	1.63065	0.356888
PRDX6	3.32932	3.40434	3.17508	3.23318	3.27452	3.2262	3.45197	3.23804	3.33347	3.40757	3.68848	3.30716	3.20042	3.5032	3.22427	3.14387	2.74342	3.1177	0.0558086
BLVRB	4.21854	4.33392	3.9117	4.03966	3.99756	4.07909	4.23446	3.91808	4.22178	4.26161	4.22086	3.96262	4.08719	4.40958	4.13008	3.70858	3.57434	3.71224	0.0107019
PRDX5	3.58718	3.63015	3.55707	3.64701	3.81371	3.63818	3.58047	3.48057	3.59648	3.46531	3.7388	3.48989	3.46834	3.84651	3.43846	3.61625	3.67359	3.76229	0.601428
DDT	3.54335	3.72337	3.58486	3.60862	3.40261	3.62071	3.45228	3.60907	3.69929	3.49047	3.78989	3.50593	3.65589	3.80731	3.41607	3.68767	3.71034	3.79941	0.662819
GCHFR	0.198034	0.276411	-0.443653	-0.235184	0.0512977	-0.0165447	0.243787	-0.139226	-0.014257	-0.115133	0.613835	-0.840673	-0.124316	1.43389	0.138853	0.143794	-0.149519	0.505749	0.736672
PRDX3	1.02607	1.27235	0.874869	0.863899	0.983987	1.04649	1.22321	1.00514	1.08866	1.19541	1.20401	0.782425	0.901413	1.09363	1.06002	1.42728	1.03565	1.03018	0.790624
ATP5F1D	-1.02826	0.06525	-0.116781	-0.502256	-0.301127	-0.381516	-0.619782	0.0989859	-0.328228	0.218895	-0.297462	-0.30321	-0.0662616	-0.421437	-0.0988579	-1.05069	-0.538899	-0.212808	0.67655
RPL12	-0.532204	-0.671192	-0.911452	-0.520918	-0.850454	-1.10148	-0.549847	-0.520972	-0.842708	-0.805492	-0.855935	-0.665777	-0.602743	-0.507605	-0.782259	-0.164679	-0.517969	-0.555508	0.221525
ECHS1	-1.95165	-2.47921	-1.55742	-1.99452	-1.15154	-1.76234	-2.03642	-1.67319	-3.32093	-1.58943	-0.999736	-2.28447	-2.49258	-1.30883	-2.34181	-1.23663	-2.43061	-1.52207	0.693885
CMPK1	0.959286	0.784081	0.618602	0.956169	0.865471	0.701655	0.995265	1.03582	0.905004	1.28645	1.13027	0.988737	0.853535	1.28697	0.766807	0.509808	0.778421	0.712599	0.0606248
PEBP1	3.64167	3.5012	3.54314	3.60974	3.56339	3.56816	3.58779	3.49235	3.64571	3.7608	3.80084	3.47339	3.51525	3.76957	3.59009	3.68438	3.54433	3.9135	0.619587
PDIA3	0.581045	0.660509	0.334032	0.697591	0.58692	0.628993	0.651104	0.588234	0.479691	1.00118	1.03464	0.459609	0.613807	0.559636	0.667196	0.832819	0.645101	0.754572	0.261357
PPP2R1A	-0.31384	-0.125448	-0.053494	-0.114758	-0.467952	0.0829726	0.0840193	0.0150754	-0.28341	-0.307203	0.197048	-0.248892	-0.254146	-0.188649	-0.0972118	0.0881549	-0.0514498	-0.021213	0.817637
FCER1G	-0.635946	-0.235787	-1.07794	-0.828228	-0.480346	-0.469193	-0.941145	-0.614253	-0.918114	-0.619153	-0.418015	-1.12856	-0.62224	-1.39703	-0.936976	-0.457671	-0.752426	0.254152	0.392187
ADSS2	-0.851565	-0.761786	-1.00907	-1.18585	-0.77605	-0.814373	-0.748036	-1.23685	-0.883532	-1.10738	-0.587853	-0.891425	-1.63933	-1.27918	-1.14406	-1.43492	-1.24634	-1.0583	0.0774079
AXL	1.3256	1.07787	1.62991	1.18973	1.61515	1.25377	1.63683	1.34497	1.60377	1.21917	1.62148	1.73953	1.46875	1.69021	1.46103	1.47051	1.68035	1.60489	0.6004
TSPO	-1.38257	-1.60371	-1.6406	-1.48576	-1.53009	-1.36241	-1.00818	-0.501497	-1.21186	-0.501228	-0.755645	-1.33412	-1.35743	-1.39869	-1.54758	-0.885795	-1.61381	-1.44025	0.0484267
ADSL	-0.691552	-1.0019	-0.745333	-0.700015	-0.819618	-1.31297	-0.739171	-0.990052	-0.831572	-1.03952	-0.325789	-1.39063	-1.37432	-1.43914	-1.19197	-1.32374	-1.50528	-1.38289	0.0869314
PKLR	3.84838	3.60433	3.58822	3.66451	3.64557	3.67763	3.78483	3.64876	3.7331	3.68322	3.99148	3.66804	3.82821	3.72898	3.47764	3.72992	3.45297	3.80769	0.903117
CLIP1	-3.30055	-3.21251	-3.45576	-3.41157	-3.09862	-3.00419	-3.36046	-2.85617	-2.41301	-2.3983	-1.97233	-3.27481	-3.14039	-3.48185	-3.27643	-3.50928	-1.2145	-2.90364	0.425812
SRI	2.115	2.00288	1.86908	1.95906	2.08957	2.09735	2.04485	2.12952	2.24249	1.84179	2.22238	2.13102	2.18754	1.74529	2.06662	1.93896	2.04438	2.05251	0.825965
GSTT1	-3.64782	-4.12959	-3.81301	-2.48661	-2.91016	-2.78104	-2.67147	-3.20864	-2.30756	-4.10378	-2.89715	-2.24412	-3.87366	-3.05499	-1.27548	-3.31988	-4.36271	-3.11502	0.324223
SERPINB1	2.37851	2.57648	2.35397	2.38087	2.43706	2.39661	2.44663	2.43484	2.46413	2.48376	3.9604	3.4735	3.73944	2.36185	2.9282	2.38178	2.36765	2.91244	0.123621
LCN1	1.58649	1.65385	1.30421	1.49458	1.24752	1.48721	1.65905	1.58614	1.3694	1.61821	1.50322	1.32466	1.65271	1.51035	1.32085	4.56679	1.26896	1.75926	0.456719
CORO1A	1.75828	1.73308	1.54928	1.79671	1.84428	1.97843	2.09857	1.90221	1.92117	1.72105	2.38028	1.63896	1.9588	1.80621	1.74826	2.35323	1.98858	2.13886	0.175902
GDI1	-0.126859	0.052795	-0.369	-0.219519	-0.34546	-0.155018	-0.30872	0.0542748	-0.156581	-0.444373	-0.0527566	-0.309826	-0.424997	-0.32663	-0.224127	-0.58051	-0.311793	-0.103723	0.659584
S100A7	-0.450555	-1.16898	-0.895552	-0.83962	-1.19698	-1.64741	-0.743525	-1.03405	0.0324373	2.75057	0.110052	-0.238069	-1.71369	-0.36044	0.0233948	0.348789	-1.37544	-0.92827	0.167225
MAT2A	-0.189037	-0.712972	-0.842219	-0.716493	-0.510524	-0.978541	-0.46754	-0.463569	-0.913112	-0.554749	-0.745749	-1.16323	-0.982544	-0.679167	-0.933877	-0.874663	-1.10698	-0.810582	0.510405
SDC4	-1.44285	-0.43816	-1.97189	-0.507733	-0.495379	-0.250776	0.20802	0.0525618	-0.934125	-0.260438	0.0315278	0.0124714	-0.460462	-0.799155	-0.0948517	-0.20863	-0.472828	0.266812	0.0719379
DNAJA1	-3.74515	-2.96526	-3.88445	-3.66068	-3.31938	-3.35791	-3.55307	-2.7816	-2.50939	-1.85197	-2.78016	-1.45439	-3.44967	-3.28817	-3.77765	-2.57786	-3.36534	-2.72804	0.0127851
UQCRC1	-2.49128	-1.96433	-1.79867	-2.19957	-1.80651	-1.74339	-2.46053	-2.44875	-2.40801	-1.95858	-2.4294	-2.43135	-2.34801	-2.30331	-2.3608	-1.61416	-2.35795	-2.33402	0.265272
HIBADH	-1.57642	-1.346	-1.72256	-1.97166	-1.7082	-1.93032	-0.60519	-1.52091	-1.61698	-1.36473	-0.887439	-1.59389	-2.17503	-2.75716	-1.94456	-1.50926	-1.80023	-1.51892	0.0236993
ATIC	-0.357143	-0.462234	-0.623242	-0.891618	-0.704892	-0.742437	-0.236664	-0.879039	-0.458564	-0.609932	0.289555	-0.543384	-0.486818	-0.60985	-0.344358	-0.342924	-0.925675	-0.315011	0.536556
APOBEC3A	-1.79226	-1.62653	-1.50064	-1.88528	-1.70992	-1.92327	-1.81205	-1.73574	-1.85183	-1.81806	-1.88529	-1.15627	-1.749	-1.85826	-1.61263	-1.89413	-1.86442	-1.8569	0.506498
HNRNPH3	-1.89378	-2.68718	-2.96442	-3.07417	-2.27273	-3.01355	-2.31366	-2.38517	-3.15519	-2.74806	-1.72857	-3.3053	-3.206	-1.18879	-1.29578	-1.85271	-2.73043	-1.14342	0.562989
HNRNPH1	0.291107	0.257746	0.191567	0.371155	0.449097	0.598084	0.269271	0.473286	0.126739	0.649525	0.596203	-0.103976	0.535161	0.418411	0.477467	0.703838	0.365943	0.619272	0.442946
CASP14	-1.57306	-0.93832	-0.545079	-1.16358	-0.481906	-0.733951	-0.884423	-1.5862	0.0416709	2.42308	-1.31771	-1.77825	-0.995775	-0.0235173	-1.18966	1.31815	-2.34804	-1.31461	0.984585
YWHAB	2.33039	2.6865	2.03266	2.61897	2.29449	2.29974	2.44367	2.51925	2.33995	2.67796	2.81321	2.61175	2.47459	2.81522	2.91934	2.51727	2.32321	2.4121	0.118281
SFN	-0.311757	-0.332171	-0.0849375	-0.128775	-0.314206	-0.146372	-0.578113	0.165852	-0.200872	1.40248	0.112023	-0.124351	0.038177	0.225519	-0.1202	-0.190352	0.0403991	0.0810855	0.285524
STIP1	1.27804	1.47089	1.08369	1.26194	1.22095	1.33624	1.12971	1.23369	1.33025	1.1873	1.57993	1.26577	1.41252	1.01025	1.45227	1.18404	1.41362	1.41756	0.959932
S100A11	3.41253	3.08509	3.4568	3.6605	3.50585	3.51462	3.45972	3.36778	3.56321	3.50369	3.46081	3.31184	3.27691	4.13615	3.16083	3.68787	3.10428	3.21718	0.849494
CEACAM8	0.716058	0.628326	0.12394	0.693621	0.443753	0.691706	1.43091	0.401022	0.847916	0.664114	0.103844	-0.0585513	-0.118814	0.74517	0.014007	0.543758	-0.0975598	0.291439	0.248062
L1CAM	-0.73899	-0.967526	-1.02707	-1.60916	-1.07756	-0.936726	-0.817038	-1.19445	-1.02392	-1.10472	-1.02696	-1.69864	-1.41926	-1.42339	-0.918486	-1.26281	-1.98294	-1.15524	0.37608
PRDX2	7.14418	7.23596	7.04223	7.07189	7.16594	7.11159	7.16887	7.03893	7.15009	7.07218	7.18642	7.03015	7.15095	7.23391	7.20515	7.2852	7.07939	7.25977	0.452895
ARRB2	-0.830906	-0.992927	-1.11097	-1.03691	-1.17423	-1.35459	-1.19868	-0.953449	-1.16245	-0.5073	-0.863346	-1.19094	-1.10498	-0.825514	-1.11594	-0.981158	-1.14151	-1.06446	0.405784
GK	-1.21035	-1.19349	-1.77668	0.861783	-1.75658	-0.865338	-1.30197	-1.96441	-0.583276	-2.0081	-0.310699	-1.08689	-1.79373	-1.50238	-1.85028	-1.40268	-0.369141	-1.85337	0.653679
VIPR1	-1.39842	-1.8708	-2.44067	-1.51633	-0.0161218	-2.36403	-1.17542	-2.36716	-1.15768	-1.34469	-1.79484	-2.56973	1.06691	-0.245701	-3.12535	0.135137	-1.2864	-1.96641	0.794835
CDA	1.27902	1.15464	0.765301	0.568798	1.23744	0.906688	0.99638	0.705335	1.13238	1.05617	0.985611	0.893202	1.15956	1.3011	1.2084	1.09395	1.2202	1.31196	0.32365
DCTD	-3.12792	-3.12949	-3.17488	-3.15136	-3.16643	-3.19899	-3.13123	-3.39533	-2.6522	-1.46413	-3.20881	-2.72381	-2.86862	-2.72112	-1.98054	-3.30691	-2.04491	-3.05819	0.417069
GBP1	-1.13888	-0.836138	-1.35084	-0.96775	-0.806449	-1.08906	-0.802303	-1.5129	-0.112616	-0.936552	-0.614084	-0.670032	-0.928319	-0.816734	-1.34446	-0.284093	-1.9647	-0.27992	0.9474
GBP2	-1.94684	-1.7674	-2.70175	-1.98965	-1.5022	-1.80138	-1.74031	-2.01963	-2.16677	-1.32823	-1.65028	-1.76807	-1.49549	-1.87745	-1.79005	-1.78551	-1.9152	-2.30098	0.259265
HPD	-2.01239	-2.1551	-2.51544	-1.99967	-1.70565	-1.63603	-1.96411	-3.36861	-1.55256	-2.31246	-1.32028	-1.54361	-1.84232	-2.48971	-2.39111	-1.90238	-2.69067	-1.94885	0.621592
DSG3	-2.6919	-1.06536	-2.49932	-2.90349	-2.67641	-0.906259	-2.87522	-2.81367	-2.58731	-2.89468	-2.75189	-2.63825	-2.9085	-1.70414	-2.87868	-2.44838	-2.66097	-2.88727	0.678235
CTH	-3.06497	-2.67566	-2.86967	-2.69546	-2.51836	-2.45431	-3.06096	-2.85335	-2.76036	-2.95014	-2.25669	-2.66905	-2.97384	-2.97351	-2.77861	-2.68389	-2.94693	-2.88721	0.189143
ICAM3	-0.479967	-0.00749334	-0.332264	-0.372709	0.0346256	-0.271132	-0.251575	-0.154978	-0.771264	-0.156116	-0.150611	-0.487443	-0.650307	-0.194236	-0.270702	0.304001	0.311594	0.0510888	0.0704354
RPL9	1.51528	1.11415	0.849573	0.882638	1.17085	1.37822	1.2001	0.760361	0.731352	1.17175	0.958856	0.44008	0.845902	0.944923	0.434792	0.984291	0.542376	0.79391	0.378805
ACSL1	-0.944003	-0.287656	-1.16935	-1.01906	-0.852304	-1.12104	-0.793754	-0.74606	-0.846061	-1.01687	-0.581062	-1.2594	-1.41277	-1.13692	-1.40176	-1.52394	-1.45564	-1.37588	0.0338373
CDH5	0.721103	0.726938	0.646266	0.358619	0.608475	0.581891	0.796276	0.775924	0.464896	0.811883	0.956047	0.781603	0.600269	0.959563	0.664738	0.799185	0.802418	0.573168	0.187613
KIF5B	-2.01627	-1.77135	0.259883	-2.24411	-1.02767	-1.61021	-2.7556	1.56824	-1.91822	-2.10725	-0.0522645	-1.6551	-2.53211	-2.25718	-2.67151	-1.49372	-2.08789	-1.59698	0.706978
CSTF2	-1.57664	-1.3496	-1.79805	-1.80508	-1.52226	-1.9094	-1.39541	-1.47067	-1.93456	-1.56465	-1.04617	-0.667849	-1.77749	-1.4088	-1.66933	-0.826529	-1.95284	-1.1237	0.290616
LSP1	1.37049	1.73118	1.26696	1.24847	1.47882	1.63312	1.55814	1.66038	1.48228	1.51874	1.65097	1.12873	1.46124	1.72594	1.65508	1.34354	1.19425	1.89658	0.911692
DUT	-1.46144	-1.8006	-1.70825	-1.27084	-0.627082	-0.45108	-0.888207	-1.49855	-1.46485	-1.4459	-1.19289	-0.65181	-1.08501	-0.755793	-1.64175	-0.352596	0.240305	-1.11655	0.0642336
MAN1A1	0.451389	0.659252	0.204636	0.000649311	0.227279	0.288959	0.430532	0.00698103	-0.0502874	0.275458	0.505769	-0.00499593	-0.0856008	0.141088	0.180151	0.200358	-0.15034	0.324957	0.423072
GALNS	2.80573	2.66145	2.5784	2.55471	2.66133	2.55263	2.84877	2.4741	2.92121	2.64303	2.84294	2.56641	2.64497	2.70662	2.55199	2.92929	2.61998	2.79927	0.618252
RNASE4	-1.42291	-1.13767	-1.91536	-1.66301	-0.735339	-1.71223	-1.09037	-1.28711	-1.12933	-1.63769	-1.85578	-1.39864	-1.39287	-1.43439	-1.2815	-1.42632	-0.902676	-1.51146	0.610705
SDC2	-2.58014	-2.5256	-2.84945	-2.33079	-1.36169	-2.77107	-1.87435	-1.8296	-2.56851	-0.97837	-2.31874	-2.18366	-2.28802	-0.387544	-1.95828	-2.68796	-2.49716	-2.59859	0.278845
CD68	-3.49845	-2.72691	-3.768	-3.65243	-3.55381	-3.89971	-3.95392	-3.63679	-4.00199	-3.76076	-4.12278	-3.5916	-3.87499	-3.51714	-3.92093	-3.44739	-3.67284	-3.96124	0.366682
SHMT1	-1.17741	-1.13908	-1.17993	-1.20247	-1.22511	-1.31354	-1.00609	-0.91755	-1.0841	-1.52457	-0.835463	-1.52245	-1.47102	-1.23654	-0.958512	-1.16173	-1.12866	-0.996381	0.536614
EVI2B	-1.5591	-0.770863	-1.3009	-0.60436	-1.42653	-0.466728	-1.57634	-1.66764	-1.66997	-1.37703	-1.47797	-1.76629	-1.86833	-1.3707	-1.58625	-1.53907	-1.84539	-1.53037	0.0390251
EPHX2	-1.87161	-1.87844	-2.25205	-2.10877	-1.68077	-1.69392	-2.56853	-1.30487	-2.0382	-1.84823	-2.08556	-1.86194	-1.57486	-1.70261	-2.17471	-1.6705	-1.89744	-1.89666	0.960257
RYK	-2.39316	-2.50127	-2.63456	-2.15605	-2.51959	-1.76614	-2.48508	-1.95497	-2.83332	-2.73931	-1.61616	-2.79445	-2.65698	-2.52619	-2.9026	-1.77379	-2.74418	-2.55062	0.74416
HSPA4	-0.337788	-0.321703	-0.509832	-0.542285	-0.454801	-0.412077	-0.385087	-0.515148	-0.456907	-0.524348	-0.330154	-0.424138	-0.655562	-0.594127	-0.485244	-0.727921	-0.77625	-0.40626	0.1328
MPI	-1.94125	-1.90064	-1.9116	-1.30143	-1.89727	-2.24025	-1.49384	-2.05638	-1.55053	-2.11665	-1.65412	-2.42341	-2.04983	-1.2252	-2.41216	-1.68687	-1.74793	-1.79295	0.856502
PRSS3	-2.7473	-3.32574	-3.19122	-3.30406	-2.91741	-2.97709	-2.14883	-3.16469	-2.34971	-3.09958	-3.16703	-3.19804	-3.31788	-3.11646	-3.41426	-3.12666	-3.08991	-3.1738	0.0861991
GPC1	-1.34849	-0.923021	-1.62952	-0.783199	-1.00261	-1.49615	-1.19465	-1.52637	-1.24686	-1.09663	-0.801261	-1.21175	-1.28054	-0.917384	-1.19039	-0.954656	-1.7507	-0.574733	0.873007
PFN2	-1.34189	-0.323465	-1.36069	-1.11727	-1.47993	-1.13875	-2.01444	-1.0628	-1.92463	-0.758567	-0.911653	-1.11975	-1.25849	-0.815146	-0.906549	-0.370329	-1.7135	-0.540276	0.355622
CTNNA1	-1.17603	-0.935376	-0.847621	-0.975854	-1.30847	-1.5728	-1.11591	-0.973037	-1.30843	-0.99546	-1.12002	-0.668717	-1.49525	-0.943203	-1.01817	-1.00244	-1.39163	-0.899769	0.563544
CTNNB1	-4.48677	-3.75759	-4.65517	-4.14702	-4.39255	-2.16847	-4.04824	-3.93221	-4.12523	-1.67118	-3.51664	-3.45376	-4.77434	-4.54801	-3.77959	-3.73298	0.26958	-3.85834	0.323446
NOS2	-3.86356	-4.11612	-3.56346	-3.39014	-4.09236	-2.84417	-3.65662	-3.51463	-4.30894	-3.66044	-3.71481	-1.57511	-4.5683	-4.0512	-3.22397	-4.23698	-3.64155	-3.54278	0.521762
PHB1	-1.56361	-1.6159	-1.56407	-1.65027	-1.4079	-1.71557	-0.773806	-1.6317	-1.60821	-1.47299	-0.92871	-1.52815	-1.65256	-1.48792	-1.55271	-1.1151	-1.44925	-1.41492	0.5438
SERPINB6	-0.886267	-0.879069	-0.198168	-0.812039	-0.566984	-0.854768	-0.430435	-0.585235	-0.670127	-0.933397	-0.349428	-0.303547	-0.350217	-0.548209	-0.473956	0.110975	-1.08468	-1.08188	0.927048
RDX	2.02554	2.30452	1.89869	1.96812	2.04883	1.99101	2.136	2.14556	1.90109	1.94563	2.2467	2.21295	2.16278	2.16824	1.93551	1.98033	2.08411	2.01295	0.868594
RPA3	-1.30388	-1.04634	-1.05778	-1.36304	-2.17008	-1.01644	-1.01098	-0.642733	-1.44493	-0.853195	-1.45276	-1.67634	-1.02887	-0.733129	-1.49244	-1.09033	-1.10474	-1.70534	0.698036
RPL22	0.565493	0.748929	0.521181	0.896402	0.988233	0.741174	0.353824	0.495374	0.579047	0.871133	0.594028	0.59581	0.533244	0.500376	0.237377	0.564463	0.037568	0.390184	0.0189477
SPR	-1.29539	-1.54436	-1.98951	-1.65408	-1.37221	-1.29947	-1.50637	-1.51864	-1.75532	-1.25551	-0.945079	-1.38004	-1.36152	-1.92189	-1.7148	-1.63933	-1.86384	-1.26766	0.301419
ADM	-0.543824	-0.457634	-0.444231	-0.273986	-0.503708	-0.673872	-0.65192	-0.517958	-1.81994	-0.519615	-0.268029	-1.07621	-0.990266	-0.188112	-0.0501973	-0.445761	-0.763091	-0.311672	0.575445
SPRR1A	-2.69183	-1.24253	-2.57355	-1.34927	-1.44376	-1.08636	-1.66802	-1.30032	-1.65385	-1.97727	-2.27383	-3.37193	-2.27488	-1.8447	-1.03533	-1.11681	-1.0324	-1.14577	0.0461404
SPRR2A	-3.45525	-3.41815	-3.74567	-4.61634	-2.81819	-4.40227	-3.90982	-1.47715	-4.01531	-0.315486	-4.51478	-3.78722	-1.77199	-3.86865	-3.88631	-0.803965	-3.62585	-3.80654	0.912332
THBS2	-1.39393	-0.824149	-0.827412	-0.853072	-1.49157	-0.807728	-1.55303	-0.501949	-0.843346	-1.15908	-0.916674	-1.01474	-0.983231	-0.796517	-0.827649	-1.00772	-0.91818	-0.524941	0.928623
THBS4	0.155186	0.484798	0.898322	0.0269642	0.123738	0.0701319	0.255903	0.723458	-0.0233882	0.450041	0.475187	-0.426187	-0.257112	0.240233	0.244387	-0.00237363	-0.217423	0.50694	0.616955
IDUA	-1.86231	-1.73752	-1.63021	-1.93415	-1.92004	-1.90675	-1.42327	-2.1545	-1.77409	-1.30433	-1.99397	-2.11571	-1.96735	-1.3959	-1.8305	-1.83904	-1.63169	-1.29453	0.825846
KRT9	1.29401	0.255938	0.839676	0.905046	-1.16584	5.35943	1.44716	1.04814	1.2028	3.22605	-0.490963	-0.457901	1.00292	0.480553	-0.0251824	2.44203	-0.27433	0.583366	0.964662
SAA4	2.60862	2.89766	2.95789	3.03961	1.99861	2.60231	2.5708	2.61465	2.65324	2.48373	2.87355	2.35581	2.56758	2.73557	2.30655	2.63705	2.09968	3.33486	0.92399
FBN1	1.66256	1.91061	1.69811	1.48948	1.82667	1.77004	1.79616	1.89631	1.82739	1.49551	1.72536	1.52842	1.70157	1.93536	1.92655	1.62737	1.82948	2.03787	0.241928
FBN2	-1.32632	-0.862983	-1.88365	-1.4668	-1.82117	-1.16572	-1.53874	-1.56398	-1.86038	-1.28373	-1.43108	-1.2665	-1.74938	-2.12448	-1.01111	-1.80636	-1.19005	-1.04454	0.817468
PCK1	-2.33032	-1.37183	-1.51172	-2.34068	-2.58242	-2.53664	-2.74958	-2.42307	-2.58594	-2.30293	-1.17331	-2.06452	-2.62037	-2.08487	-2.36313	-2.30873	-2.62544	-2.60505	0.0477404
AGL	-1.89341	-2.38988	-2.69215	-2.76577	-1.56661	-1.99737	-1.31841	-2.51854	-2.19496	-2.01154	-2.39082	-2.95922	-2.80889	-3.19171	-1.37759	-2.42758	-2.70404	-1.93824	0.915488
MYH9	0.0476617	-0.189068	-0.0170585	-0.0610793	-0.198144	-0.08047	0.727478	-0.30067	0.0107962	0.51677	0.772312	-0.369613	-0.308674	-0.0489455	0.135718	0.867526	0.286918	0.419165	0.277984
COPB2	-0.590389	-1.0796	-0.349233	-0.45534	-1.48642	-0.797505	-0.546305	-0.755808	-0.56049	0.147322	-0.27969	-0.343767	-0.546248	-0.851668	-0.166125	-0.332412	-0.035418	-0.748495	0.226216
ADD1	-0.310926	-0.155045	-0.403308	-0.499868	-0.518534	-0.243905	-0.0789573	-0.467854	-0.0547787	-0.223805	0.0781533	-0.258346	-0.704703	-0.45436	-0.50385	-0.342166	-0.407431	0.0303666	0.128456
ADD2	-0.070884	-0.089657	0.10026	-0.155826	0.0110051	-0.480667	-0.0656309	-0.21276	0.0522599	-0.0876834	0.174926	0.0840095	-0.331248	-0.0740787	0.161342	-0.114503	-0.34679	0.327917	0.78486
BSG	0.636039	0.946286	0.767174	0.853875	0.742677	0.573696	0.607971	1.47589	0.805106	0.532491	0.705107	0.44892	1.06169	0.957635	0.654402	0.752886	0.918902	0.640145	0.4357
FUS	0.164529	0.300392	-0.138226	0.221354	0.301685	0.314011	0.59172	0.370637	0.177421	-0.133062	0.0303827	0.098448	0.819955	0.688901	0.682755	0.155693	0.31792	-0.350969	0.00648586
NUP214	-2.87749	-2.91082	-2.92385	-2.40647	-3.27222	-3.28781	-2.39186	-2.19264	-3.04915	-1.62493	-1.97409	-2.13727	-2.16236	-1.32104	-2.1471	-2.16328	-2.24448	-1.96114	0.00684055
DEK	0.302493	-0.238001	-0.571573	-0.546085	-0.694487	-0.625345	0.168291	0.228802	-0.92986	0.0589796	-0.049992	-0.336964	-0.35951	0.055574	0.525144	-1.55088	-0.256478	0.210138	0.600282
GLRX	2.20002	2.11801	2.13834	2.19532	2.10273	2.06386	2.0655	2.3704	1.95602	2.14237	2.25164	2.33925	2.32099	2.01183	2.11812	2.45898	2.26737	2.47368	0.138691
PPM1A	-1.52859	-1.93233	-1.81446	-1.14021	-2.11416	-1.40958	-1.18505	-1.15256	-1.37588	-2.37974	-1.247	-0.0867174	-1.41458	-1.91141	-1.32012	-0.72209	-0.756194	-1.64189	0.672256
IGFALS	0.182225	0.333263	0.00621406	0.146305	0.1557	0.180636	0.00328573	0.163688	0.27678	-0.0381939	0.444068	-0.116207	0.0790385	0.216951	-0.395216	-0.429861	-0.127907	0.343242	0.76183
KRT20	-2.37553	-1.32874	-1.28422	-2.09508	-2.76056	-1.31644	-1.81239	-2.32709	-2.48223	-3.04386	-1.52209	-0.696772	-2.97285	-3.24002	-2.08411	-2.12071	-1.31909	-1.75645	0.429671
KRT2	2.58087	2.36498	2.1921	2.94491	1.4432	5.612	1.9682	3.11114	3.83157	4.23723	1.07589	0.739294	2.13312	2.11215	3.53648	5.50821	1.53939	2.67488	0.877204
HMGCL	-1.59533	-2.65962	0.775463	-2.05806	-2.42882	-1.15065	-0.880636	-2.06104	-1.88165	-0.963355	-1.42634	-0.634791	-2.18268	-1.96469	-0.975589	0.808694	1.29314	-2.66445	0.596777
FLT4	-0.54075	-0.464538	-0.564738	-0.696257	-0.446405	-0.482879	0.0258269	-0.53079	-0.587126	0.00915438	-0.549515	-0.549077	-0.74063	-0.53256	-0.519326	-0.597725	0.0252156	-0.558822	0.752572
KDR	-0.592505	-0.631505	-0.508299	-0.658452	-1.74418	-0.240127	-0.339013	-0.293048	-0.348935	-0.421238	-0.445876	-0.0194634	-0.429765	-1.30563	-0.76474	-0.0678917	-0.699234	-1.16664	0.491689
PSMC2	-0.832067	-0.6895	-0.819869	-1.21298	-1.14852	-0.705267	-0.263307	-1.30806	-0.772938	-0.303352	-0.037572	-0.924875	-0.901364	-0.35659	-1.01521	-0.189833	-0.782899	-0.137597	0.309114
CHI3L1	2.04549	2.06193	1.52848	1.78591	2.06727	2.00233	1.93001	1.8404	2.02389	1.99489	2.2577	1.99598	1.97525	2.13115	1.68857	2.08726	1.90384	2.23955	0.719894
GGT5	-4.90393	-4.81022	-4.78825	-4.87602	-4.99488	-4.87202	-4.90332	-3.30736	-4.89512	-4.93389	-4.9786	-5.31657	-3.56507	-4.75723	-4.39269	-5.15778	-4.71578	-5.12441	0.221456
ARL3	-0.594859	-0.184713	-0.834977	-0.674474	-0.654229	-0.788439	-0.447659	-0.249846	-0.317476	-0.405544	-0.303434	-0.437689	-0.727498	-0.327098	-0.557694	-0.787886	-0.657936	-0.365723	0.240946
MAP2K2	-1.00627	-0.0565719	-0.0514388	-0.819871	-0.436279	-0.418195	-1.41393	-0.372644	-0.987944	-0.567598	-0.626197	-1.09922	-0.500308	-0.651083	-0.204994	-1.01392	-0.59755	-0.544698	0.490474
ATP6V1E1	-0.911681	-0.224577	-0.667393	-0.640796	-0.862083	-0.527279	-0.625591	-0.676478	-0.451682	-0.534716	-0.191178	-0.503243	-0.931431	-0.78843	-0.837485	-0.799809	-1.03938	-0.841211	0.0777638
RPL4	0.341276	0.72647	0.390745	0.280572	0.307701	0.198534	0.664957	0.194086	-0.020649	0.528434	0.206692	0.314106	0.781828	0.420874	0.444566	0.834058	0.729886	0.728055	0.0704731
NUDT1	-0.089247	-0.218875	-0.65004	-0.241395	-0.525867	-0.111488	-0.0381154	-0.0796549	0.0379175	-0.426902	0.251497	-0.0479251	-0.265605	-0.16156	-0.363039	-0.791711	-0.365578	-0.0128055	0.506571
PGM1	0.133495	0.475198	0.0365026	-0.0610119	-0.135876	0.0966649	0.0652405	0.162955	0.0264617	0.254647	0.479229	0.222621	0.23336	0.141698	0.0675994	-0.0122178	0.0812255	0.502596	0.262613
PPP1CC	0.696678	0.817317	0.604871	0.662534	0.273817	0.358652	0.676638	0.488217	0.833618	0.351782	0.682385	0.671962	0.589256	0.272319	0.645129	0.0839742	0.275286	0.520075	0.143036
ACVR1B	1.58903	1.54661	1.82247	1.81995	1.5177	1.57063	1.50717	1.8621	1.57612	1.43612	1.76512	1.433	1.74707	1.52347	1.37324	1.60904	1.8772	1.90481	0.547035
TGFBR1	0.0835451	0.317033	2.10251	0.795341	1.95444	-0.645857	-0.0697079	-0.0714649	0.0392633	0.0430812	-0.035479	1.29617	-0.266347	0.659524	-0.1537	-0.206462	1.26551	1.79856	0.690614
LTBR	-2.63582	-2.45544	-2.71581	-1.96555	-2.62859	-2.59114	-2.25378	-2.62153	-2.79436	-2.58577	-2.12799	-2.58225	-2.87492	-2.78312	-2.81346	-2.22375	-2.96156	-1.28764	0.513447
SERPINB5	-0.573182	-0.534873	-0.514606	-0.970201	-0.806468	-1.02802	-0.43397	-0.882039	-0.671476	0.930936	-0.577489	-1.03918	-0.847037	-0.451589	-1.03921	-0.539138	-0.763406	-0.71743	0.546361
SERPINF1	2.56769	2.67588	2.42995	2.21743	2.24121	2.38796	2.6262	2.52869	2.44345	2.43829	2.74874	2.6014	2.34506	2.66042	2.41433	2.1475	2.40531	2.15701	0.0246673
DLST	1.93025	1.84456	1.75227	1.83527	1.73011	1.69568	1.8694	1.86579	1.82673	1.61483	1.91453	1.75342	1.89423	1.99287	2.13376	2.07572	1.84968	2.03292	0.0442331
GMPR	0.913273	1.18846	1.02305	0.805448	0.885342	0.824137	0.756425	0.978289	0.919281	0.795119	1.08261	0.791046	0.951692	1.03836	0.848007	0.94156	0.945669	1.01675	0.329164
GPX4	0.785309	1.03742	1.15145	0.642355	0.781056	1.03619	-0.0321169	0.981451	0.837287	0.859139	0.858571	0.249648	0.7279	0.320679	0.485682	0.906597	0.508562	0.489052	0.502611
CFHR2	2.39764	2.71622	2.64899	2.43879	2.61132	2.60974	2.38245	2.67598	2.58399	2.51114	2.7339	2.60733	2.68406	2.56687	2.77885	2.39844	2.87709	3.04316	0.646619
ACVRL1	-2.07008	-1.1266	-2.29539	-2.33989	-2.35947	-2.1741	-2.23563	-2.24194	-2.4848	-2.41848	-1.92813	-1.57323	-2.36183	-2.3724	-1.80523	-2.328	-2.15987	-2.22278	0.475664
SCNN1A	-2.65487	-1.20143	-2.11086	-1.2515	-1.93284	-0.71503	-1.7078	-2.18508	-2.32717	-2.4773	-2.38718	-2.44522	-1.01302	-1.768	-1.01373	-0.906918	-2.13707	-0.74092	0.0794771
SRP14	-1.54183	-1.63784	-1.48189	-1.79779	-1.83638	-1.66185	-1.87903	-1.7328	-2.3226	-1.55242	-1.60119	-1.66292	-1.61174	-1.48986	-1.20542	-1.73299	-0.737712	-2.22945	0.506488
TGFBR2	1.11991	1.37945	1.16522	0.832475	0.987556	1.34347	1.33757	0.725431	1.00065	1.18085	1.22566	0.900118	1.08606	0.607971	1.25234	1.2978	1.09369	1.25974	0.741721
NUP62	-2.1315	-1.62892	-2.37746	-2.30642	-2.33097	-1.96559	-2.11398	-2.17341	-2.42432	-1.99546	-1.6932	-2.28794	-1.61183	-2.11261	-1.45844	-1.39816	-1.88365	-2.3823	0.457463
HPCAL1	-0.948567	-0.899048	-0.526153	-0.874561	-0.635961	-0.591198	-0.613703	-0.81976	-0.30937	-0.898543	-0.928716	-1.0244	-0.597992	-0.896797	-1.06504	-1.46343	-0.674952	-0.366108	0.719309
TAGLN2	0.757596	1.08297	1.05127	1.03337	1.14574	1.02132	1.06893	0.861107	1.12222	1.07526	1.30361	0.82469	0.920528	1.34936	1.06111	1.27747	0.878049	1.28949	0.867685
TALDO1	4.38383	4.44149	4.32014	4.29408	4.35414	4.23856	4.39559	4.39844	4.48252	4.30983	4.57244	4.44337	4.53568	4.46336	4.28937	4.43305	4.26112	4.36519	0.394302
SNCA	2.6349	2.94671	2.22964	3.01655	2.79435	2.86854	2.78268	2.94575	2.96902	2.70992	2.35138	2.42709	2.9765	2.17889	2.8456	2.8924	2.84635	3.07004	0.235904
ETFB	-1.56745	-0.742234	-2.36649	-0.816334	-2.53671	-2.57147	-2.66408	-2.19632	-1.07784	-2.18863	-2.3998	-2.14559	-1.4083	-2.26257	-2.45649	-1.21247	-2.16433	-2.17115	0.894328
RBMX	-0.194452	-0.220599	-0.182774	-0.0609818	0.129633	-0.0763008	0.119387	-0.105092	0.0282173	-0.890532	0.262879	-0.326293	-0.447878	-0.0441671	-0.558315	-1.00642	-0.692278	0.295912	0.591219
LIPA	0.740726	0.71708	0.600642	0.789288	0.597701	0.691452	0.630198	0.568135	0.747125	0.529717	0.945541	0.602682	0.619937	0.700323	0.512452	0.659961	0.759846	0.573558	0.953004
ATP6V1A	-0.14555	0.263768	0.314811	-0.634491	0.245988	-0.19925	0.0656993	-0.185037	0.189838	0.0213907	0.0591336	-0.536715	-0.444826	-0.00852139	-0.0548327	-0.0874853	-0.450714	-0.567604	0.406643
HSPA9	-0.888382	-0.645738	-1.14755	-0.906227	-0.814384	-0.843589	-0.499986	-0.979394	-1.2026	-0.732923	-0.263797	-0.962914	-0.811409	-0.843684	-0.921085	-0.574812	-0.606828	-0.361031	0.323418
EIF4A3	-1.73396	-1.06274	-0.457663	-1.32091	-0.662028	-0.142353	-1.53575	-0.230344	-0.999935	-0.750601	-0.691197	-1.54063	-1.61691	-2.20885	-1.04059	0.611624	-1.29453	0.816058	0.20286
RPS19	0.307832	0.306574	-0.0360992	0.308259	0.38323	0.164369	0.128633	0.243243	-0.171051	0.249801	0.0238165	-0.139699	-0.115805	0.235099	-0.0417593	-0.101256	-0.362268	-0.200314	0.0630654
RPL3	-0.413986	-0.184743	-1.01521	-0.516644	-1.64172	-0.263969	-1.08376	-0.828868	-0.753793	-0.359082	-0.565268	-1.43187	-0.236315	-0.50201	-0.902772	-0.112336	-0.570759	0.029042	0.534217
COL15A1	0.0473348	0.242303	-0.0308998	0.130769	2.68674e-05	-0.260378	-0.00240486	-0.0236174	0.105572	-0.271187	0.00912131	-0.0961615	0.232693	0.38167	-0.742855	-0.317232	-0.490112	-0.175922	0.584695
COL18A1	1.34545	1.2349	0.970288	0.997442	1.24501	1.19458	1.24751	1.01412	1.00008	1.26188	1.33578	1.13377	1.2433	1.22114	1.12724	0.698425	1.0828	1.25034	0.596041
DDOST	-1.366	-1.43966	-1.49089	-1.42451	-1.49126	-1.35248	-1.49482	-1.45743	-1.25309	-0.68062	-0.902334	-1.39435	-1.67559	-0.977922	-1.60532	-0.974245	-0.822642	-1.59789	0.304204
ANP32A	1.50395	1.50954	1.48523	1.46972	1.77621	1.5167	1.58252	1.50117	1.61714	1.47961	1.54513	1.36737	1.60186	1.6491	1.30425	1.75226	1.31302	1.78325	0.827281
FEN1	0.295627	-0.286656	-0.14891	0.436312	-0.23154	-0.457582	0.270523	0.303686	-0.543992	-0.0666951	-0.0996971	0.160076	0.0749653	-0.325578	-0.407228	-0.381398	-0.52959	-1.04234	0.252652
CAPG	2.04636	2.08353	2.15275	2.12975	2.13444	1.96301	2.12095	2.2818	1.98505	2.79916	1.96056	2.28846	2.24758	2.75896	2.21923	2.36471	2.74147	2.22627	0.306524
IL6ST	-0.361512	-0.441046	-0.500609	-0.473025	-0.51938	-0.337736	-0.301464	-0.300156	-0.390686	-0.41667	-0.341013	-0.441519	-0.261935	0.0366781	-0.512435	-0.267777	-0.393442	-0.0501039	0.358952
CCT6A	0.569897	0.741839	0.4569	0.152288	0.361482	0.232173	0.382628	0.0829371	0.484119	0.448164	0.576739	0.0724084	-0.140706	0.171316	0.143983	0.0330623	-0.146672	0.0302945	0.0120171
PSMB10	-1.3547	-0.791401	-1.41171	-1.3553	-0.980256	-1.24177	-1.45159	-1.34224	-1.34915	-1.13058	-0.908923	-0.879495	-1.02594	-0.441941	-1.8503	-1.0732	-1.07312	-0.833069	0.71064
RPL13A	-3.54624	-3.35742	-3.23816	-4.4432	-2.31551	0.42642	-2.02696	-3.14132	-3.28631	-2.96507	-2.48454	-2.11774	-3.15877	-2.89913	-1.89714	-2.37099	-3.32438	-3.49277	0.792565
ARL1	-2.7669	-2.79727	-2.65715	-2.74821	-2.72715	-2.79236	-2.77274	-2.70641	-2.82673	-2.77386	-2.78754	-2.76917	-2.80637	-2.46798	-2.75102	-2.68468	-2.75847	-2.78558	0.759693
STAT3	-4.16171	-3.42182	-2.92667	-3.11581	-3.96564	-3.94049	-3.745	-2.95312	-4.17121	-2.61507	-2.80346	-4.14385	-3.82652	-4.04975	-3.83338	-1.91095	-2.42188	-3.87568	0.394874
MDH1	3.39082	3.81117	3.33682	3.45236	3.52813	3.41212	3.37761	3.38289	3.50686	3.45078	3.57611	3.66463	3.27604	3.18321	3.23771	3.01619	3.18153	3.04825	0.00430806
MDH2	1.81157	1.75992	1.5252	1.82708	1.76731	1.6455	1.91132	1.85602	1.61404	1.82326	1.98327	1.70775	1.74093	1.66016	1.5906	1.81794	2.09206	2.01703	0.119351
HADHA	-1.55561	-2.15975	-2.00477	-2.03931	-1.24622	-1.87391	-0.657373	-1.50615	-1.7046	-1.11739	-1.06069	-1.32886	-2.20458	-1.45921	-1.92244	-0.835385	-1.38518	-1.2226	0.0726628
EIF2S3	-1.42036	-1.51985	-1.98145	-1.58758	-1.65232	-1.58314	-1.59066	-1.36871	-1.37188	-1.47721	-1.21592	-2.06948	-1.33239	-1.74481	-1.8805	-2.1943	-1.3061	-1.77756	0.884925
LEP	-1.9064	-2.76364	-2.58693	-2.20296	-2.53524	-2.72929	-3.10294	-3.14497	-2.39691	-2.71141	-1.673	-2.73548	-2.136	-1.12137	-2.9142	-1.01835	-1.98571	-2.19957	0.3035
AQP2	1.09735	0.835509	0.922792	0.922414	0.937395	0.831694	0.655462	1.14351	0.816035	0.904468	1.0272	0.867963	0.992356	-1.14776	0.886634	0.61262	0.858174	0.846127	0.549422
CD200	1.98659	1.93925	2.00232	1.6747	1.83488	1.77707	1.47766	1.48238	1.74002	1.89003	1.8959	1.65385	1.73009	2.17011	1.25699	1.46171	1.51623	1.89423	0.36134
MNDA	1.62556	2.11316	1.6595	1.97613	1.85024	1.94202	1.63003	1.94836	1.51345	1.83274	2.00895	1.86847	1.99992	1.93359	1.85467	1.77671	1.96586	2.10335	0.44563
PTGDS	5.1912	4.83498	4.93129	4.97162	5.09031	5.06806	5.03092	4.85077	4.68818	5.0184	5.35357	4.69914	4.82542	5.59286	5.47468	5.31444	5.00985	4.93974	0.467245
UBA7	-2.51635	-2.63363	-2.18087	-2.64327	-2.53732	-2.1637	-1.73652	-2.54259	-2.72607	-2.77874	-1.48719	-2.54601	-2.54564	-2.51431	-2.49726	-2.67814	-2.75133	-2.89031	0.683485
NAA10	-2.76828	-2.67177	-2.45871	-2.99286	-3.8558	-3.05295	-2.58986	-3.3125	-4.02461	-4.46276	-3.14724	-3.72838	-2.44783	-2.88749	-4.15359	-2.75713	-3.24424	-3.52177	0.39217
PPP1R2	-1.56252	-1.92191	-1.38556	-0.686468	-1.76421	-1.35411	-1.66563	-1.04761	-1.27303	-1.34201	-1.01562	-1.71695	-1.12664	-1.2799	-1.2984	-1.83946	-1.45997	-1.79691	0.431389
CSK	-0.861074	-1.31386	-1.25765	-1.79562	-2.02478	-2.20817	-1.36112	-1.60677	-2.14868	-1.60771	-1.7157	-0.25404	-1.71189	-1.06754	-1.98454	-2.08692	-1.22293	-1.22065	0.307372
GARS1	-1.93919	-1.65007	-1.99642	-1.85589	-1.72539	-1.8017	-1.56697	-2.02588	-1.98998	-1.63959	-1.48411	-1.86252	-2.41443	-2.53177	-2.24662	-2.53148	-2.04436	-1.85922	0.0139019
IARS1	-2.10907	-1.73567	-2.49535	-2.57229	-2.58421	-2.59671	-2.55053	-2.70122	-2.75904	-2.7423	-2.80978	-2.54615	-2.52135	-2.705	-2.8478	-1.7896	-2.74548	-2.69248	0.159215
NBL1	-0.234893	-0.0415795	-0.449819	-0.466665	-0.731208	-0.0795048	-0.0397649	-0.110915	-0.293486	-0.479144	0.203456	0.029653	-0.334823	-0.46724	0.206601	-0.0412886	-0.158971	0.232316	0.526845
EIF1	-1.69426	-1.10157	-1.97183	-1.80815	-1.40711	-1.78671	-1.45868	-1.60935	-1.73587	-1.53643	-1.33783	-1.90602	-1.37101	-1.72958	-1.22778	-1.74571	-1.9055	-1.03783	0.973977
ACTR1B	-1.01936	-0.644271	-0.694021	-0.961575	-0.879147	-0.941697	-0.643048	-0.535139	-0.65896	-0.713043	-0.963918	-0.588802	-0.766554	-0.544139	-0.91632	-0.404857	-0.234073	-0.966543	0.334779
ECI1	-2.00589	-1.77426	-2.54043	-1.92069	-2.01093	-2.60837	-1.538	-2.48967	-2.25587	-1.69617	-1.50722	-2.20693	-2.53036	-1.1369	-1.89877	-1.96861	-2.76722	-1.96218	0.836869
TMPO	-0.198819	0.0331109	-0.38422	-0.345826	-0.449122	-0.091473	-0.294224	-0.316022	-0.149649	-0.0739401	-0.0186023	-0.1618	-0.130601	0.205851	0.0311688	-0.354334	0.426356	0.00662125	0.322394
STAT1	-2.64752	-0.913152	-1.52689	-2.49674	-2.32883	-2.53393	-0.867132	-2.30167	-1.79748	-1.16382	-2.5215	2.25542	-2.58742	-1.92497	-1.44145	-0.3898	-2.21431	-1.81321	0.51016
STAT6	-3.64496	-3.57044	-3.0556	-2.73819	-2.74939	-3.54599	-3.899	-3.22562	-2.38841	-2.70618	-2.29542	-3.09342	-3.83698	-2.6289	-2.82257	-3.14268	-2.56096	-3.65947	0.725088
AKR1C3	-1.88964	-2.09914	-2.28593	-2.11787	-1.49482	-2.12771	-1.73073	-1.67564	-2.27092	-1.84545	-1.11206	-2.56435	-2.53656	-1.63593	-1.42477	-1.96066	-2.28717	-1.29133	0.987332
ARHGAP25	-2.55451	-3.57722	-2.2373	-2.08036	-3.10919	-2.44538	-1.10195	-2.02005	-3.8559	-2.323	-2.15954	-2.36174	-1.28752	-0.741962	-2.89362	-2.02916	-1.99196	-2.22819	0.634028
HAL	-4.18024	-3.49787	-3.92955	-3.99096	-4.4593	-0.432689	-3.48657	-4.80021	-4.27319	-3.12261	-4.13082	-4.4906	-3.87179	-3.75056	-3.58017	-1.33721	-3.40719	-2.91855	0.448172
EPS15	-0.182731	-0.282337	-0.480549	-0.687094	-0.25305	-0.617806	-0.0148164	-0.469329	-0.508563	-0.269154	-0.14878	-0.45414	-0.281971	-0.293661	-0.586859	-0.287854	-0.172244	-0.0774772	0.433492
CASP3	-1.52307	-1.5187	-1.5516	-1.56475	-1.54126	-1.53437	-1.53561	-1.50358	-1.50523	-1.53207	-1.50659	-1.5096	-1.54406	-1.40707	-1.5255	-1.49034	-1.54415	-1.52967	0.566133
RPS27	0.110639	0.389993	0.389861	0.473237	0.389142	0.448687	0.311994	0.750679	0.33371	0.421523	0.64442	0.486578	0.682356	0.491805	0.304567	0.894891	0.600638	0.749116	0.0953767
LIFR	-1.66668	-0.791233	-1.50796	-0.84169	-1.06133	-0.15316	0.507441	-0.259045	-1.27163	-1.97213	-1.58151	-1.68189	-1.89316	-1.94418	-1.84697	-0.345641	-1.78254	-1.77719	0.0416552
LRPPRC	3.53128	1.35038	0.281422	-1.78642	-1.4193	-1.62367	-1.65567	-3.2198	-1.39803	1.87556	-2.4148	1.07831	-1.25732	0.203753	-1.71464	-2.37275	-2.34963	-1.4617	0.0236669
RPL35	-2.71497	-2.31439	-3.073	-2.63	-3.11287	-2.51874	-2.42126	-2.77309	-2.64213	-2.29389	-2.70134	-2.13313	-2.7456	-2.29273	-2.44798	-0.845718	-2.68203	-0.13145	0.0684655
WAS	-1.43914	-0.937929	-1.06053	-1.19504	-1.19236	-1.00142	-0.993665	-0.928439	-1.17399	-0.68553	-0.932549	-0.843273	-1.00281	-0.902365	-0.836212	-1.16689	-1.49878	-1.02917	0.0964159
PRCP	1.96154	1.85905	1.80199	2.00785	2.08905	2.08546	1.6845	1.83775	1.88307	2.13473	2.17576	1.87695	1.90491	2.01697	1.91334	2.27143	1.96448	2.46608	0.0265997
CXCL5	-1.48429	-1.66726	-1.70485	-1.6438	-1.34212	-1.88759	-1.29625	-1.41988	-1.62703	-1.715	-1.52286	-1.72185	-1.69033	-1.67013	-1.51477	-1.73903	-1.71412	-1.77769	0.370392
NSG1	-2.94288	-3.8162	-3.72266	-3.86806	-3.77353	-3.6496	-3.65521	-3.89235	-3.42379	-3.84807	-2.99642	-3.87241	-3.46541	-2.58908	-2.48063	-4.03438	-3.72848	-2.52831	0.333594
ECE1	-0.607633	-0.358744	-1.02972	-0.675937	-0.589732	-0.908762	-1.08574	-0.3173	-0.218865	-1.07879	-0.344763	-1.31964	-0.9759	-0.281239	-1.42076	-0.163242	-0.66917	-1.26726	0.910618
PAFAH1B1	-2.09486	-0.871444	-1.26455	-1.84927	-1.51249	-0.760287	-1.68378	-0.736641	-1.54158	-1.82755	-1.06019	-1.59965	-2.21379	-1.57669	-1.45939	-1.12032	-2.39288	-1.88391	0.816157
PTGER3	-2.15784	-1.73762	-2.27608	-1.87989	-1.76038	-1.98677	-2.12215	-1.76935	-1.54007	-2.14133	-2.15118	-1.63208	-1.90536	-1.72541	-0.903304	-1.68707	-1.76505	-2.29891	0.471451
MCAM	0.775207	1.05839	0.654028	0.774473	0.55191	0.706709	0.739519	0.914472	0.761828	0.67644	0.731496	0.701701	0.9484	0.628853	0.804027	0.666462	0.759707	0.951472	0.701796
CTSO	-1.55034	-1.5273	-0.562863	-1.45945	-1.58006	-0.824192	-0.969627	-1.18174	-1.35071	-1.52552	-1.48018	-1.2492	-2.26594	-1.14659	-1.54793	-1.46542	-1.4334	-1.40162	0.659506
MATR3	-1.54364	-1.34144	-2.83501	-2.04427	-1.71474	-2.31877	-2.27505	-2.09645	-2.6085	-1.45061	-2.03906	-2.51479	-2.89999	-1.6598	-2.21198	-2.06336	-2.96026	-1.8385	0.899381
GRK6	-2.73255	-1.75518	-2.56628	-2.73402	-2.78189	-3.03148	-2.75589	-2.83825	-2.86671	-1.68739	-2.22934	-2.46076	-2.87013	-2.42199	-0.447485	-2.99102	-2.48628	-2.15193	0.406949
BTD	3.32275	3.57247	3.30358	3.32817	3.23903	3.19435	3.23663	3.49971	3.43654	3.5475	3.6798	3.52056	3.60963	3.72291	3.72787	3.42205	3.36729	3.52581	0.00356294
GPD2	-1.40064	-0.137957	-2.06763	-2.51433	-2.6466	-1.23515	-0.184774	-2.17636	-2.75038	-1.8966	-2.75385	-2.20343	-1.95947	-2.68615	-2.10088	1.49595	-1.86401	-2.48179	0.631412
SSR1	-0.02008	-0.792521	-0.818408	-1.3483	-1.11884	-0.127502	-1.04206	-0.829092	-0.91481	0.452659	-0.943448	-1.06894	-1.05426	-0.953944	-0.824577	0.706198	-1.1062	-1.18146	0.891221
ALDH3B1	-3.08533	-3.10049	-3.1161	-3.18429	-3.06654	-3.15106	-3.10977	-3.19134	-3.17642	-3.22369	-3.09068	-3.11589	-3.06475	-3.0047	-3.06278	-2.86583	-2.9819	-2.52432	0.00990437
SYK	-1.95458	-1.94905	-1.98544	-2.06179	-2.13938	-1.31067	-1.93395	-2.1349	-1.82376	-2.16452	-1.93891	-2.05819	-2.05125	-2.10717	-1.99583	-1.41798	-2.11793	-2.0355	0.848466
RANBP1	1.11971	1.53977	0.965433	0.799603	1.20838	0.853195	1.33538	0.797617	1.01677	0.582068	0.697577	0.440149	0.657898	0.967425	0.382549	-0.103149	-0.781568	0.158142	0.00101498
TNFRSF4	-4.6869	-4.43622	-4.3711	-4.76795	-4.02342	-4.76255	-4.66913	-4.3889	-3.34341	-4.96488	-4.44276	-4.7965	-4.30781	-3.96847	-2.86772	-4.23986	-3.52235	-4.70189	0.28569
NAMPT	-0.258707	-0.386697	-0.366508	-0.504805	-0.452056	-0.378973	0.114538	-0.258898	-0.272894	-0.121373	0.293538	-0.38642	-0.331144	-0.374922	-0.266452	-0.0832106	-0.192931	0.0316121	0.108622
KIR2DL3	-0.337341	-0.627005	-1.0077	-0.506111	-0.51862	-0.349358	-0.609011	-0.941185	-0.679418	-0.652896	-0.17606	-1.08583	-0.560543	-0.60065	-0.556333	-0.314013	-1.04651	-0.258885	0.88915
AFM	5.26356	5.34843	5.24852	5.32346	5.40221	5.28613	5.32707	5.22011	5.324	5.31427	5.58111	5.23933	5.37943	5.57949	5.43845	5.53518	5.35696	5.4591	0.193049
PSMC4	-2.20581	-2.01161	-1.51035	-2.807	-3.12391	-2.28979	-2.32523	-2.89089	-2.78153	-1.79913	-1.72515	-1.89831	-1.93431	-2.01586	-1.05341	-1.55529	-3.04024	-3.13457	0.0634286
ASPA	-2.32505	-2.23632	-2.27284	-2.17658	-2.18481	-2.23669	-2.31337	-2.2866	-2.42934	-2.27238	-2.15123	-2.29375	-2.26203	-2.22498	-1.90791	-2.33613	-2.36375	-2.28911	0.127336
PPIC	-3.90346	-1.44438	-4.81063	-5.40194	-4.32545	-4.67013	-4.88565	-2.5321	-4.77785	-4.37832	-2.91287	-0.350352	-5.46631	-4.55485	-4.73042	-4.57809	-3.16642	-1.31622	0.298712
VDAC2	-2.91904	-2.53047	-2.705	-2.95711	-3.02355	-1.89038	-2.09085	-1.90006	-2.56484	-1.87211	-2.33318	-1.84862	-3.15867	-3.32607	-2.63684	-1.65313	-1.53992	-2.04273	0.00969688
USP5	0.241996	0.327504	0.0999785	-0.224252	0.0205616	0.0463324	0.354224	0.0199897	0.319438	0.246121	0.597816	-0.102525	-0.0990933	0.0741362	0.21417	0.163598	-0.197794	0.103338	0.38493
MAPK9	-2.5106	-2.51117	-2.66197	-2.61201	-2.57106	-2.47385	-2.56811	-2.47372	-2.52309	-2.50087	-2.48178	-2.41856	-2.54701	-2.39687	-2.5369	-2.11144	-2.46286	-2.60347	0.569513
RANGAP1	-2.76081	-2.31713	-2.08223	-2.39322	-2.66214	-2.63581	-2.97767	-2.59705	-2.97158	-2.50497	-2.04506	-3.18305	-2.94731	-3.36992	-3.21365	-2.29373	-4.38459	-2.63036	0.455451
CRK	-2.2111	-2.12794	-1.96113	-2.27302	-1.50817	-2.0705	-2.40763	-2.48717	-2.69788	-1.66224	-1.34101	-2.14271	-1.51574	-1.38962	-1.04474	-1.74582	-1.60083	-1.44015	0.00228258
CRKL	-0.630058	-0.653968	-0.914987	-0.759797	-0.489287	-0.634911	-0.594039	-0.781693	-0.643309	-0.602368	-0.50379	-0.676965	-0.567537	-0.453566	-0.375013	-0.7234	-1.20344	-0.298442	0.639145
BAG6	-1.08071	-1.36062	-1.57128	-0.988389	-1.43837	-0.86528	-0.890176	-0.994105	-0.688417	-1.15023	-0.135147	-1.34638	-0.581473	-1.24087	-0.725166	-0.661112	-0.591309	-1.37968	0.588311
NSF	-0.508797	-0.296927	-0.234975	-0.228269	-0.415599	-0.456463	-0.177711	-0.139409	0.0610381	0.0736755	0.288847	-0.0884968	-0.31466	-0.0246559	-0.356141	0.0979866	0.0430286	0.132672	0.00443774
NOTCH1	-2.76774	-3.73143	-2.23844	-3.35091	-3.49272	-1.89117	-3.46876	-3.53807	-2.44816	-2.24935	-3.41536	-2.72128	-3.19935	-3.05089	-2.72465	-2.97386	-3.35199	-1.43278	0.953753
MAP2K3	-2.72821	-2.53759	-2.54456	-1.82553	-2.13384	-1.82748	-1.57384	-2.31548	-1.75452	-1.29812	-0.940613	-2.30256	-2.72802	-0.983501	-2.44576	-2.25734	-2.38983	-2.33927	0.224395
BRCC3	-4.91041	-5.57553	-5.14505	-5.59581	-3.74462	-5.40984	-5.28409	-5.39399	-5.42116	-5.20503	-4.23764	-5.36047	-2.92211	-5.62804	-5.38764	-5.25693	-4.88984	-5.62398	0.882469
RPL27A	-0.971946	-0.803428	0.486821	-0.349082	-0.556547	-0.863553	-0.00180335	-0.548411	0.273566	-0.648699	-0.647391	-0.122716	-0.651604	-0.636079	-0.494504	-0.358648	-0.336976	0.302805	0.576834
RPL5	-1.52679	-2.22039	-1.83657	-1.27829	-2.09873	-0.860815	-0.925701	-1.85896	-1.05866	-1.2837	-1.73152	-1.02999	-1.78325	-2.11219	-0.657006	-1.86253	-1.68743	-2.01528	0.588703
RPL21	-2.57612	-2.18177	-2.54263	-2.04213	-2.33176	-1.67835	-2.53938	-1.24523	-1.92034	-1.95106	-1.49963	-2.1407	-2.1853	-2.56658	-2.4063	-1.87908	-1.19364	-1.32915	0.0705687
RPL28	-1.63664	-1.85633	-2.06955	-1.89697	-1.96358	-1.9777	-1.82483	-1.90061	-1.80076	-1.71485	-1.14287	-1.98572	-1.88045	-1.79684	-1.61845	-1.0438	-1.18047	-1.78838	0.131868
RPS9	-0.418203	-0.378344	-0.811454	-0.195111	-0.0144955	-0.406275	0.0125466	-0.308579	-0.932005	-0.0938608	-0.317568	-0.313366	-0.274038	-0.41983	-0.818774	0.0743574	0.28673	-0.091922	0.128861
RPS5	-0.875457	-0.851619	-1.45336	-1.18271	-0.668106	-0.691458	-0.874822	-1.4546	-1.11321	-0.551449	-0.410719	-1.41895	-1.37608	-0.619269	-0.908066	-0.760556	-1.34445	-0.470562	0.861249
RPS10	-1.01073	-1.09752	-1.25986	-1.0021	-1.73778	0.398074	-2.32609	-1.0633	-1.462	-0.57202	-0.491828	-1.21577	-1.33166	-1.11311	-0.733126	-0.0143083	-0.572628	-1.72225	0.59221
GNPDA1	-0.465733	-0.280144	-0.636394	-0.629973	-0.862603	-0.661019	-0.45454	-0.967354	-0.570027	-0.78851	-0.511124	-0.66951	-0.64934	-0.529874	-0.628423	-0.835032	-0.892393	-1.19691	0.0640921
UTRN	-1.04462	-0.482619	-0.458815	-0.57455	-1.97236	-1.55619	-0.305392	-1.02484	-2.02215	-0.911924	-0.709037	-1.71555	-1.04033	0.225239	-0.579933	-0.851288	-1.33106	-0.340419	0.530508
IQGAP1	-0.157571	-0.129065	-0.314828	-0.242213	-0.21541	-0.27948	0.06109	-0.113579	-0.143136	0.170438	0.0950812	-0.252595	-0.468822	-0.0475041	-0.357389	0.04551	-0.196546	0.0305692	0.167612
HAAO	-4.45857	-3.69251	-3.33772	-2.10474	-1.67784	-1.21741	-3.46025	-4.21398	-0.886715	-3.16426	-3.86006	-3.51328	-3.43589	-1.98163	-3.04836	-1.42744	-2.14893	-3.37193	0.132176
GYG1	1.23489	0.993453	1.31377	1.26174	1.07773	1.12337	1.1632	1.24934	1.09354	1.0065	1.23116	0.937045	1.19765	1.14548	1.17385	1.07319	1.00997	0.978288	0.361185
STT3A	-1.30719	-1.49416	-1.46683	-1.44282	-1.03876	-0.976494	0.418539	-0.480486	-1.33302	-1.19908	-1.22114	-1.31194	-1.53015	-1.50009	-1.25681	-1.27071	-0.670068	-0.943607	0.0925192
CAPZA2	0.184756	0.50234	0.109418	-0.168118	0.113053	-0.0860515	0.282877	-0.00822069	0.184172	0.0189232	0.271524	0.296157	0.313976	-0.00287693	0.511527	0.196447	0.0374476	0.345316	0.354644
CAPZB	2.03953	1.9254	1.90574	1.96597	1.73867	1.97697	2.13565	2.07654	2.25526	2.17734	1.91623	2.08046	1.91199	2.45631	2.1558	1.91484	2.1866	2.17137	0.259235
OMP	-0.237397	0.448323	-0.162671	-0.0929738	-0.199302	0.441693	0.574597	0.278877	0.555799	-0.109359	-0.347545	0.108152	0.285553	-0.282925	0.580075	-0.123872	-0.108211	1.07526	0.577082
ALDH1A3	-1.39743	-1.21538	-1.56735	-1.37122	-1.63019	-1.40158	-1.39804	-1.79326	-1.50672	-1.1525	-1.20232	-1.61919	-1.71054	-1.81624	-0.932686	-1.50084	-1.75679	-1.30804	0.894949
QARS1	-2.92735	-1.58328	-2.66305	-3.17572	-2.57755	-2.25688	-3.11829	-3.21967	-1.6288	-2.09768	-2.9479	-2.9286	-3.17402	-2.24677	-2.99689	-2.83167	-3.11011	-3.02669	0.873923
RPL29	-1.75739	-0.619923	-1.5741	-2.14715	-1.01797	-1.43076	-1.67275	-0.874759	-1.22807	-1.13593	-0.969244	-0.925391	-0.898333	-0.691397	-0.676728	-1.34107	-0.998687	-0.470371	0.308861
LGALS7	1.04626	1.43119	1.66012	1.62489	1.75378	1.19444	2.02366	1.36569	2.85364	3.92005	1.48412	1.66287	0.96728	1.7049	1.63859	2.35997	1.57748	1.306	0.511239
NPTX2	-0.292287	0.944445	-0.639827	-0.785731	-0.792114	-0.576268	-0.650461	-0.435878	-0.385459	-0.703247	0.568209	-0.870235	-0.579418	-0.303036	-0.385964	-0.951147	-0.506757	-0.383766	0.579158
ATP5PO	-0.808297	-1.16307	-1.11208	-1.2283	-1.31479	-1.44029	-1.10829	-1.31357	-1.12725	-1.36987	-1.0195	-1.40181	-1.44402	-1.62853	-1.75566	-1.20504	-1.59671	-1.5785	0.0190767
CXCL12	0.719931	0.402485	0.503787	0.496646	0.517493	0.574815	0.288622	0.873267	0.237606	-0.204956	0.509978	0.171331	0.119599	0.0801618	-0.564723	0.294112	-0.288839	0.762608	0.202909
PREP	-0.754234	-0.816501	-1.21123	-0.997039	-0.904173	-0.901358	-0.802802	-1.04125	-0.801915	-0.370242	-0.801419	-0.877822	-1.03326	-0.96855	-1.03346	-0.99933	-0.711615	-1.32967	0.435288
ME1	-4.00446	-3.92978	-4.23705	-3.93768	-4.40643	-2.97697	-4.09103	-4.78286	-2.58514	-0.940335	-4.0806	-3.66359	-4.04709	-3.45593	-3.96939	-2.6273	-3.90198	-3.185	0.658075
REG1B	-0.206008	-0.245783	-0.102083	-0.235012	0.223066	0.22592	-0.703206	0.0277842	-0.0285735	-0.20281	-0.545674	-0.295938	0.13087	-0.56067	-1.82002	-0.184244	-0.139803	0.0059284	0.406662
LEPR	-1.44506	-1.14582	-1.47147	-1.40213	-1.46304	-1.38287	-1.35345	-0.481699	-0.80935	-1.14439	-0.863221	-1.65554	-1.35864	-1.73939	-1.69812	-1.15488	-1.65521	-1.25013	0.140109
PIP4K2A	-0.107038	0.0758404	-0.12539	-0.312385	-0.296185	0.249448	-0.0161692	-0.388909	-0.211276	-0.300435	-0.00765349	-0.488222	-0.234244	0.0704316	-0.306551	0.0735356	-0.692656	-0.0401551	0.930335
ARCN1	-1.54709	-1.82819	-1.74747	-2.03844	-2.14845	-1.92304	-1.66109	-1.909	-1.75328	-1.66341	-1.87256	-1.72854	-1.83477	-1.76429	-2.39844	-1.44704	-2.43547	-2.2418	0.480951
GCLC	-0.928856	-0.434177	-1.12467	-0.965689	-1.04676	-1.24963	-0.612228	-1.14618	-0.651586	-0.953004	-0.205452	-0.893479	-0.81251	-0.833287	-0.651116	-0.661786	-0.770761	-0.443751	0.44033
GCLM	-0.358214	-0.668551	-0.997481	-1.27171	-1.24082	-1.28746	-0.420131	-1.74112	-0.582823	-1.27326	-0.239159	-1.48754	-1.39791	-0.918187	-0.816225	-0.474306	-0.881435	-0.625995	0.568399
CD151	-2.53927	-2.33497	-2.19733	-2.23163	-2.50617	-2.51523	-1.57801	-2.446	-2.49893	-2.29298	-2.34748	-2.32689	-2.38538	-2.33981	-2.31084	-2.08849	-2.45299	-2.34416	0.882828
IFNAR2	2.79673	2.51123	2.43969	2.46926	2.73899	2.59845	2.55261	2.24564	2.48703	2.5342	2.82447	2.61922	2.40868	2.89382	2.39854	2.81264	2.77078	2.90597	0.21836
PSMD8	-0.919643	-0.419306	-0.664114	-0.562009	-0.739515	-0.599158	-0.623237	-0.461589	-0.732029	-0.323486	-0.331243	-0.806457	-0.82755	-1.32496	-0.574641	-0.693892	-1.03787	-0.91513	0.280604
SERPINB4	-2.64611	-2.63968	-2.19216	-3.36518	-2.93398	-2.22055	-3.08305	-2.25217	-4.0599	-0.0692908	-3.55092	-2.94824	-3.41826	-3.39688	-3.13399	-2.83953	-3.65002	-3.48008	0.574205
SERPINB10	0.791738	0.914179	0.796131	0.770397	0.793817	0.783162	0.873368	0.775319	0.775264	1.05027	1.0201	0.685828	0.761438	1.04664	0.596868	0.771278	0.847096	0.820842	0.833208
GSS	1.62194	1.31671	1.20859	1.40441	1.51367	1.42073	1.57994	1.54626	1.42065	1.59664	1.66977	1.21127	1.53702	1.69199	1.41246	1.84239	1.26872	1.57363	0.859467
CCT5	-1.15484	-0.969639	-1.16007	-1.10704	-1.11573	-1.33052	-1.05528	-1.03063	-1.29664	-1.11527	-0.888287	-1.13651	-1.3297	-1.22837	-0.838565	-1.15634	-1.26197	-1.1439	0.858393
KRT6C	3.71124	3.3131	4.0266	3.62631	2.86662	6.71868	3.33399	3.6072	4.2962	5.69268	3.24884	2.55607	2.91068	3.17191	3.63773	5.69681	3.00411	3.69185	0.89963
HSPA13	-3.02695	-3.12373	-3.00208	-2.71715	-2.94367	-3.09191	-3.07402	-3.02566	-3.06054	-3.06773	-2.83915	-3.01893	-3.0609	-3.06981	-3.06999	-2.97577	-3.07296	-2.98132	0.444543
CSNK1A1	-2.23299	-1.99168	-2.20422	-1.12959	-2.22684	-2.16798	-2.31902	-2.22852	-2.27964	-2.42826	-1.00113	-2.08562	-2.20653	-2.36342	-1.50356	-2.14047	-2.26601	-2.08643	0.773824
IDH2	1.38921	0.617523	-0.680744	-1.86976	-1.20033	-0.737135	-0.146031	-1.11322	-0.335978	1.03178	0.66558	-0.474739	0.736587	-0.426512	1.45333	1.42935	1.17602	2.64248	0.0101645
PITPNB	-0.301135	-0.753792	-0.573863	-0.803017	-0.58752	0.378421	-0.493709	-0.298576	-0.599595	-0.53597	-0.566547	-0.199317	-0.632266	-0.5722	-0.770315	-0.350077	-0.391504	-0.758994	0.862172
MASP1	0.600159	0.826547	1.00671	0.434642	0.655881	0.881817	0.953162	0.796249	0.734968	0.662258	0.838733	0.638127	0.862647	0.924875	0.762631	0.526487	0.888358	0.789547	0.666824
CCN3	-0.717233	-0.0942667	-0.461762	-0.488696	-0.531827	-0.362689	-0.493978	0.0106899	-0.35056	-0.837851	-0.222498	-0.821563	-0.660889	-1.35716	-0.765785	-0.82837	-0.682333	-0.144633	0.243014
ADGRE5	-3.37673	-2.49135	-3.2763	-4.07841	-3.41275	-2.65425	-3.02969	-3.57331	-3.4082	-3.4757	-3.40153	-2.93543	-3.07	-2.4713	-3.06225	-3.57034	-3.2014	-2.60831	0.738898
MARCKSL1	-1.6776	-2.81507	-2.02841	-3.66731	-3.19761	-2.91569	-1.90111	-1.6233	-1.90991	-2.08439	-2.59473	-3.17115	-2.80236	-2.30508	-1.53249	-4.17241	-2.84597	-1.85496	0.142695
PXN	-3.57534	-2.98793	-3.20456	-2.19813	-3.32057	-1.09041	-3.09079	-3.29711	-3.11279	-2.72689	-3.59858	-3.00134	-2.92797	-2.10236	-2.81386	-2.42178	-2.3132	-1.74645	0.10465
ALDH9A1	0.503557	0.273137	0.515822	0.280239	0.292177	0.398224	0.22725	0.711177	0.433336	0.558553	0.551155	0.379139	0.244524	0.198048	0.194292	0.0499543	0.0439779	-0.294945	0.00497154
TGM4	-2.4479	-2.39285	-0.16068	-0.725807	-2.12084	0.758349	-1.60149	-0.0443078	-1.36286	-2.64192	1.92251	-2.26743	-2.14103	-2.0243	-2.58873	-1.99517	-2.47707	-1.93885	0.637859
RPIA	0.505731	0.467293	0.51171	0.264479	0.435962	0.418225	0.622308	0.0557128	0.442704	0.447785	0.733055	0.838162	0.610306	0.632411	0.812421	0.570333	0.622707	0.586175	0.0975854
LMAN1	-2.11339	-3.09609	-2.30901	-2.19021	-3.92365	-2.66443	-3.96071	-2.47091	-3.93293	-2.92431	-2.46275	-2.93223	-2.7306	-3.58332	-4.13798	-2.67414	-2.32195	-5.14983	0.675306
SLC11A2	-0.557606	-0.0497181	-1.04449	-0.829568	-1.02794	-0.825555	-0.531175	-1.04136	-0.10569	1.04163	0.154262	-0.363586	-1.04726	-0.872177	0.668056	-0.66817	-1.31416	-1.2067	0.158763
NASP	-3.70189	-3.47779	-3.66425	-3.76383	-2.68447	-3.50564	-2.94767	-3.53968	-3.15255	-1.71209	-2.98763	-3.81033	-1.81821	-4.01833	-3.18488	-2.18801	-4.08144	-3.50091	0.874503
FASN	-2.85326	-2.64669	-1.17668	-3.1963	-1.40098	-2.10838	-3.07269	-3.97893	-2.86584	-2.1233	-2.25865	-2.31585	-1.88513	-3.01038	-4.59269	-2.38358	-2.73055	-2.75249	0.399517
FNTA	-2.27045	-1.0479	-1.64281	-1.29011	-1.61925	-1.50752	-0.47291	-1.83296	-1.57961	-1.48383	-1.46902	-2.08761	-1.34777	-1.05093	-3.05981	-1.40176	-1.23348	-1.83563	0.922042
FNTB	-1.88352	-1.55709	-2.4684	-2.10815	-1.73117	-1.98609	-1.67449	-2.3318	-1.86135	-2.06172	-1.63478	-2.56086	-2.23682	-1.72737	-1.96761	-1.53791	-2.65262	-1.83222	0.998069
CCT3	0.293094	-0.00918435	0.362722	0.0685316	0.145266	0.0121486	0.52303	0.1025	-0.00502298	0.0546254	0.530317	0.237834	0.330338	0.224133	0.177176	0.0776292	0.0213647	-0.196475	0.36029
MRPL19	0.509991	1.75347	1.12057	1.05962	0.499219	0.387941	1.76475	1.49955	1.31086	0.23544	3.15102	0.591254	2.20889	0.952214	0.220704	0.671352	2.20223	0.774715	0.892895
ARRB1	-0.606973	-0.355212	-0.598728	-0.667315	-0.706103	-0.847206	-0.293878	-0.460507	-0.124956	-0.674206	-0.764357	-0.232598	-0.272552	-0.737697	-0.168584	-0.449439	-0.802888	-0.693488	0.181081
TUFM	-1.47099	-1.71801	-1.73764	-1.84293	-1.74264	-1.76856	-1.79399	-1.80843	-1.73676	-1.62996	-1.49414	-1.81297	-1.29627	-1.71829	-1.79578	-1.20694	-1.5371	-1.08162	0.035976
AMPH	-0.969904	-0.915774	-1.02575	-1.00147	-1.35786	-1.34828	-1.31089	-1.76073	0.350922	-1.35153	-1.24084	-0.0182137	-1.52322	-0.4955	-1.19671	-0.23132	-0.792667	-1.25591	0.951077
ALDH7A1	-0.407598	-0.329406	-0.738221	-0.395561	-0.655419	-0.549942	-0.6601	-0.64878	-0.721576	-0.0520933	-0.3615	-0.750838	-0.652074	-0.501661	-0.467023	-0.539139	-0.797186	-0.311288	0.693738
CDC34	-0.438793	-0.52639	-0.451675	-0.382596	-0.488624	-0.0305481	0.175108	-0.473515	-0.106442	0.220422	0.00226619	-0.372792	-0.492959	-0.334664	-0.148601	-0.453612	-0.0650811	-0.362928	0.352824
INPP1	-2.2138	-2.1899	-2.22765	-2.05265	-2.83054	-2.03492	-1.95174	-3.35647	-1.92378	-1.42628	-1.39833	-2.28975	-3.0908	-2.2808	-2.9712	-3.50195	-3.25049	-2.93753	0.03616
SRP9	0.565077	0.541327	-0.169067	0.139938	-0.139254	-0.00217002	0.0941829	-0.0172295	0.0969708	0.0173295	0.106707	-0.177027	-0.049334	0.568209	0.026997	0.123038	-0.0270339	0.293489	0.581437
AARS1	-1.62042	-2.38712	-2.90699	-1.53395	-1.97502	-2.30794	-3.00609	-2.92342	-2.02774	-2.10378	-2.05262	-2.81477	-2.60939	-2.67272	-2.73125	-2.16873	-3.0389	-2.28196	0.429709
CARS1	-1.47749	-1.05007	-1.37461	-1.40859	-1.53045	-1.35124	-1.47846	-1.4176	-1.16458	-1.12849	-1.00425	-1.45643	-1.48832	-1.12042	-1.65303	-0.474809	-0.974542	-1.16944	0.11045
SARS1	-0.524218	-0.352603	-0.814868	-0.575086	-0.462125	-0.694518	-0.559224	-0.521723	-0.62782	-0.779765	-0.543838	-0.759534	-0.521086	-0.491164	-0.867361	-0.7002	-0.496317	-0.621548	0.899163
PPM1F	-3.84788	-3.66795	-3.80365	-3.70016	-3.71002	-3.44441	-3.69776	-3.66515	-3.66539	-3.80072	-3.71102	-3.80058	-3.70856	-2.83983	-3.61427	-3.57216	-3.85768	-3.72943	0.313385
PSMB3	0.33023	0.558513	0.32217	0.311668	0.366023	0.262301	0.238213	0.258377	0.529174	0.41057	0.593537	0.393754	0.443541	0.824643	0.000680149	0.0964236	0.297263	0.542741	0.926103
PSMB2	1.60992	1.59957	1.14105	1.53572	1.53046	1.64672	1.45643	1.14499	1.46286	1.59637	1.98107	1.39929	1.66939	1.85141	1.61429	1.84438	1.35675	1.63589	0.370272
COMP	0.493539	0.487601	0.520996	0.354827	0.0700088	0.634857	0.389339	0.657222	0.43696	0.60415	0.586544	0.280674	0.727632	0.576866	0.589363	0.00291204	0.557512	0.722248	0.742745
ACADVL	-1.30627	-1.38714	-1.55739	-1.69684	-1.24119	-1.24183	-1.48477	-2.15554	-0.546133	-1.34146	-1.6199	-1.33723	-1.5035	-1.57273	-1.50046	-1.05661	-1.6116	-1.56157	0.997942
TMED10	-3.18767	-3.06443	-3.55153	-3.51128	-3.63008	-2.92299	-2.94302	-3.16069	-3.12398	-2.75472	-3.06429	-3.3765	-3.51081	-2.92821	-0.636148	-1.94307	-3.26383	-3.08491	0.588274
RBM25	-4.47516	-3.36197	-4.56232	-3.91643	-4.20501	-4.39876	-4.53357	-2.22221	-4.75728	-3.96628	-4.66237	-4.24141	-3.85431	-4.35176	-4.67675	-2.85925	-4.49543	-3.43008	0.834764
VEGFC	-2.22257	-2.32197	-3.47651	-3.02842	-3.61785	-3.06515	-2.57167	-3.04075	-3.18877	-3.01828	-2.13014	-3.84081	-2.75234	0.397046	-1.60299	-2.45495	-2.82764	-2.30125	0.140294
HINT1	0.745941	0.541304	0.399822	0.444703	0.497412	0.236471	0.566573	0.501986	0.658691	0.411383	0.548813	0.294146	0.56647	0.650222	0.758974	0.790755	0.766427	0.762646	0.0143755
RARRES1	-1.48683	-0.953479	-1.20368	-1.20693	-1.84602	-1.65984	-1.82255	-1.60527	-2.06993	-0.468385	-1.83887	-1.7381	-1.94811	-1.09609	-1.95129	-1.73787	-1.79544	-1.6114	0.499938
RANBP2	0.094836	0.169327	-0.107048	0.236992	0.126136	-0.105846	-0.277238	-0.139062	-0.00752886	-0.0459923	0.122045	-0.198382	-0.0652359	-0.058946	0.986002	0.402213	-0.183921	-0.0109043	0.653571
GSK3A	-2.17267	-1.14907	-1.94551	-2.32516	-2.01858	-2.56807	-1.74329	-2.31682	-2.19715	-1.67012	-2.04408	-2.68878	-1.48376	-1.02482	-2.13427	-2.63774	-1.73602	-2.43102	0.32797
NT5C2	-1.14531	-1.25873	-1.00263	-1.02134	-0.808751	-0.677471	-0.478152	-0.757084	-0.908676	-1.08231	-0.868417	-0.945121	-1.36755	-1.40668	-1.76903	-1.51252	-1.90782	-1.00311	0.00742614
SEPHS1	-2.30758	-2.28421	-2.63615	-2.41592	-2.40446	-2.10831	-2.37052	-2.05653	-2.39897	-1.64889	-2.19909	-2.69453	-2.84613	-1.23267	-2.62606	-2.86467	-2.43161	-2.18753	0.96006
SELENOP	0.898802	0.794568	1.27689	1.24584	1.578	1.62487	1.25382	0.840664	1.08262	0.636723	1.4855	0.797445	1.32142	1.22119	0.972382	1.6046	0.949685	1.25388	0.295765
CAMP	3.62866	4.04384	3.89126	3.92247	3.76497	3.7481	3.8613	4.13971	3.76501	3.7665	3.73999	3.72592	3.88796	3.78359	4.0227	3.86915	3.80071	4.27507	0.60668
GMPS	-0.823787	-1.41664	-0.926382	-1.59917	-1.78887	-1.51132	-1.53639	-0.980393	-0.967576	-1.4417	-0.780225	-1.63127	-1.67832	-1.299	-1.59938	-1.554	-1.39969	-1.49751	0.15986
KHK	-1.42158	-0.671365	-2.38803	-1.45752	-1.68643	-1.89434	-1.67178	-1.40709	-1.72517	-0.80652	-2.25148	-2.10613	-1.56751	-1.16689	-0.771205	-1.67044	-0.267881	-1.00266	0.588008
RBP2	-2.73602	-3.06869	-2.70363	-0.316392	-2.73224	-3.4678	-2.82673	0.262833	-3.3186	-2.63839	-2.36407	-0.130582	-2.84616	-1.27073	-2.34855	-2.0948	-2.77097	-2.14822	0.913833
HNMT	-1.18457	-1.56443	-1.2994	-1.14451	-1.51936	-1.22931	-0.953428	-1.17708	-1.19259	-1.23834	-0.69483	-1.54751	-1.74638	-0.979373	-0.896303	-1.09125	-1.36671	-0.471016	0.800259
GNAQ	0.119189	0.31376	-0.943195	-0.542403	-1.05096	-0.466652	-0.0499838	-0.434247	-0.454113	0.197635	0.00470138	-0.46356	-0.478103	0.00664993	0.238966	-0.977353	0.158311	0.352158	0.636249
SULT1A1	-1.80578	-2.59947	-2.87046	-2.4356	-2.61583	-3.2705	-1.81625	-3.03741	-2.96298	-2.94177	-2.95499	-2.92972	-2.81906	-2.65233	-1.67755	-2.96593	-2.84126	-3.01613	0.565661
CRIP1	-1.37774	-1.41102	-1.01549	-1.40629	-0.545905	-1.21218	-1.3228	-1.28872	-1.39769	-1.19806	-1.48103	-0.81943	-1.31535	-1.31357	-0.695993	-1.34689	-1.28382	-1.48055	0.714428
GDI2	3.47203	3.37365	3.13628	3.26417	3.36049	3.37441	3.38646	3.24704	3.44902	3.41851	3.42649	3.32989	3.24358	3.54341	3.34538	3.27695	3.23796	3.63272	0.987987
EMD	-0.4921	-1.43713	-1.98001	-1.44173	-1.81995	-2.28147	-1.16321	0.132942	-1.99887	-0.919755	-1.33159	-1.93321	-0.963404	-2.14186	-0.411627	-1.75144	-2.14231	-1.90202	0.5529
GATM	-3.12021	-2.17576	-3.37601	-2.98949	-1.09565	-1.83801	-2.92964	-3.21802	-2.98255	-3.18671	-3.07235	-3.18546	-3.20353	-1.95349	-3.16295	-2.28029	-3.18825	-3.1624	0.262909
SERPINB8	-1.28338	-1.0212	-0.814082	-0.784585	-0.993538	-0.993059	-1.15865	-1.38654	-1.03238	-0.763265	-0.377399	-0.864788	-0.369626	-0.880162	-1.04978	-0.993725	-1.41268	-0.792224	0.193454
SERPINB9	-0.399107	-0.358361	-0.962334	-0.912752	-0.588234	-0.911046	-0.855707	-0.584643	-0.58888	-0.962219	-0.792708	-1.32452	-1.40614	-1.00893	-1.21746	-1.3228	-0.952678	-0.964956	0.0386991
SERPINH1	-2.2313	-2.62408	-3.84668	-3.73509	-3.82485	-4.12902	-4.00294	-3.93829	-3.65692	-3.96625	-3.69551	-3.69686	-3.45287	-3.40537	-4.04766	-3.92815	-3.59359	-2.58278	0.177803
ST13	1.11637	1.55522	0.78737	1.14672	1.08611	0.846651	1.31398	0.923269	1.41229	1.4137	1.63565	0.968126	1.27778	1.44908	2.02333	1.08314	1.16944	1.65237	0.421637
VASP	0.23052	0.386111	0.00879274	0.00700745	0.101513	0.261584	0.0316793	-0.213903	0.124184	0.131433	0.501524	-0.254194	0.0395514	0.453179	-0.273864	0.220928	-0.159023	0.281073	0.935467
DNM2	-1.23216	-1.54612	-1.69999	-1.82195	-1.62769	-1.13963	-0.93441	-1.82135	-1.44932	-0.764686	-0.607539	-1.01637	-1.37394	-1.3168	-1.26471	-0.750442	-1.59544	-0.723748	0.114161
NUDT2	-4.47064	-5.89441	-5.47626	-4.73455	-4.12087	-5.12369	-5.34926	-3.1133	-5.07498	-5.17647	-3.28693	-2.20658	-2.76906	-1.98269	-2.83898	-5.24862	-2.9091	-4.92599	0.0773929
RASSF2	-0.772507	-0.894875	-0.800804	-0.995238	-0.952306	0.0634772	-1.07294	-0.245571	-0.744412	-0.819744	-0.750826	0.550906	-0.72885	-0.0448399	-0.0144585	0.905372	0.40854	-0.786731	0.381874
BCAM	-0.678632	-0.80224	-0.608522	-0.954579	-0.805034	-0.63878	-0.597386	-0.590993	-0.819914	-0.96879	-0.691153	-0.911456	-0.813367	-0.731019	-0.625999	-0.527291	-0.805534	-0.686922	0.446886
PPT1	0.653227	0.942905	0.781211	0.4707	0.687204	0.548548	0.825122	0.409282	0.845659	0.771954	0.844621	0.616864	0.721889	0.589822	0.656111	1.05547	0.972818	0.850835	0.0784617
RPL14	-1.01845	-0.152389	-1.48707	-1.45111	-1.19552	-1.39713	-0.923337	-1.50249	-1.6211	-0.646161	-1.05574	-1.43507	-1.25015	-1.36449	-1.4217	-0.130952	-1.06529	-1.47924	0.597558
CCT8	1.28263	1.37143	1.07334	1.30582	1.32008	1.39039	1.27873	1.24756	1.3066	1.41119	1.53169	1.28116	1.27321	1.58855	1.47885	1.21712	1.0518	1.43818	0.315148
CCT4	0.91095	0.926606	0.714608	0.566663	0.487686	0.720393	0.541624	0.632928	0.560548	0.764695	0.91703	0.568795	0.495744	0.630552	0.431851	0.455928	0.45641	0.270779	0.00587452
ANXA11	0.779568	0.513347	0.565149	0.302305	0.323656	0.116432	0.643958	0.3337	0.532862	0.586153	0.503603	0.444063	0.499941	0.486675	0.294913	0.872236	0.678085	0.639336	0.00811614
RAB5C	-0.528469	-1.05771	-1.50722	-0.72162	-0.530386	-0.874868	-0.654345	-0.788275	-0.593733	-1.17988	-0.329176	-0.459366	-0.930919	-0.424081	-1.12853	-1.19945	-1.07519	-0.70268	0.635641
RAB7A	2.18974	2.14796	1.91573	1.89953	2.07904	1.88376	1.99918	1.93256	1.98537	2.02924	2.22201	1.89372	2.08545	2.09997	1.96888	2.22695	2.31882	2.40682	0.0214253
RAB27A	-0.837455	-0.276937	-0.256405	-0.389927	-0.384806	-0.643266	-0.0089014	-1.04918	-0.815673	-0.502885	-0.0752315	-1.03671	-0.659188	-0.777828	-0.552761	-0.413714	-0.252437	-0.604004	0.937513
FABP6	-0.164228	-0.128618	1.12	-0.346927	-0.308739	0.238045	0.13066	-0.471266	0.867639	-0.44118	0.189397	-0.504043	-0.0754876	-0.490864	-0.099096	0.381091	0.34848	0.0268851	0.561884
SCNN1G	0.636264	-2.15071	0.273767	0.00584818	0.0593404	-0.667861	0.0227676	1.09512	-0.230183	-1.57894	1.4521	1.04596	-1.23579	2.81868	0.944038	-1.0876	-0.625764	-0.0817456	0.756273
PLCD1	-0.618298	-0.552307	-0.598608	-0.619911	-1.04677	-1.02242	-1.09565	-0.793389	-0.623629	-0.611598	-0.987788	-1.3108	-0.639167	-0.972484	-1.68112	-0.505162	-0.732132	-0.459753	0.266871
DAP	-3.40388	-0.566421	-2.62423	-3.12619	-3.05365	-2.92063	-2.61233	-3.1797	-2.87487	-2.21835	-2.79381	-3.14826	-2.22425	-2.60454	-2.08634	-2.95422	-2.95681	-3.23695	0.482971
DUSP3	-1.21875	-1.43608	-1.30531	-0.797074	-1.28613	-1.36052	-1.14178	-1.28817	-0.923673	-0.623005	-1.06983	0.53408	-1.06345	-0.985913	-1.24564	-1.01427	-1.24151	-1.25899	0.112905
SMARCA2	-3.53705	-3.76809	-3.64314	-3.86056	-3.47712	-3.72323	-3.69661	-3.50631	-3.6347	-3.73438	-3.71965	-3.54208	-3.71995	-2.78634	-3.71938	-3.66486	-3.14376	-3.76963	0.822326
BCAP31	-1.09033	-0.771691	-0.455067	0.609642	-0.429423	-0.707741	-0.719361	-0.609935	-0.568957	0.663967	0.744985	-0.781969	0.541676	0.192074	-0.810928	0.0225519	-0.563856	-0.6588	0.33583
TPMT	-1.11335	-1.05607	-0.662374	-1.35896	-1.17386	-1.18613	-1.32292	-1.18519	-1.11484	-1.19374	-1.15312	-0.889214	-1.07731	-0.750123	-1.32985	-0.833185	-1.45851	-1.18217	0.605051
RENBP	-1.92866	-1.82743	-1.72403	-2.02388	-1.92968	-1.65514	-2.18753	-1.9662	-2.07243	-1.14839	-1.04957	-1.87629	-1.99664	-1.01062	-2.13452	-2.26268	-2.06115	-2.01815	0.139019
MECP2	-2.10739	-2.43167	-1.99372	-2.66502	-2.48766	-1.72211	-2.24588	-1.49476	-2.41894	-2.1055	-2.65875	-1.62531	-2.21533	-3.01753	-1.45561	-2.03978	-1.56972	-2.22548	0.963673
HCFC1	-1.34311	-1.42354	-1.25881	-1.50467	-1.6201	-1.28941	-1.43958	-1.45587	-1.35268	-1.58511	-1.26435	-1.49011	-1.61184	-1.4807	-1.64925	-1.19833	-1.87117	-1.17491	0.774846
ALDH5A1	-1.73764	-2.97851	-3.74546	-3.50532	-3.60508	-3.21532	-2.50756	-2.34708	-3.38104	-3.33082	-1.95647	-1.0317	-3.21076	-1.38942	-2.51232	-2.85812	-2.55733	-2.99893	0.440957
GPC3	-1.71917	-1.33344	-2.30256	-2.56195	-1.65849	-1.62027	-1.51671	-2.26231	-2.58341	-1.83535	-1.51314	-1.82908	-2.43292	-2.04121	-2.19095	-1.66321	-2.22489	-1.52642	0.635272
HSD17B4	-0.575712	-0.175337	-0.439774	-0.287775	-0.0039742	-0.686148	-0.13282	-0.299246	-0.652936	0.243314	-0.158144	-0.327812	-0.238227	-0.200346	-0.624819	-0.225726	-0.267436	-0.0748362	0.623699
PSMD7	-2.27734	-1.82454	-2.35574	-2.02912	-1.91243	-3.33494	-2.76815	-2.46035	-2.42009	-1.72992	-1.72995	-3.01295	-2.14483	-1.73334	-1.9384	-2.54058	-3.0407	-1.69827	0.751648
SUOX	-1.99818	-1.8603	-2.04528	-2.72804	-1.75236	-2.43053	-1.99012	-2.27663	-1.98099	-2.10413	-1.52365	-2.14874	-1.69516	-2.39925	-1.60296	-1.86179	-2.95801	-2.22984	0.596684
SGSH	1.75597	1.94765	1.59844	1.82705	1.83751	1.7362	2.78058	1.85173	1.57921	1.73951	3.21571	3.02249	3.0988	1.82239	2.75498	1.97143	2.33103	3.21051	0.264974
STAT5B	-2.46783	-2.85291	-3.29702	-3.28187	-2.97433	-3.15072	-2.83201	-3.23773	-2.91651	-3.44674	-1.42762	-3.07695	-3.11796	-2.96884	-3.16974	-1.89796	-3.12389	-1.76834	0.463416
APLP1	-1.94547	-1.95696	-1.60029	-1.90124	-1.95421	-1.6161	-1.79914	-1.63491	-1.95305	-0.591821	-1.95634	-1.37389	-0.648165	-1.62833	-1.45948	-2.15312	-1.63612	-1.47959	0.293797
KCNQ1	-2.92629	-2.59303	-2.395	-2.94232	-2.64756	-2.78834	-1.60849	-1.94152	-2.57346	-2.75616	-2.38939	-1.0032	-1.47061	-1.79198	-3.07332	-2.86804	-1.45471	-2.57935	0.596575
PLXNA3	-0.895838	-0.377688	-0.968148	-0.678943	-1.31865	-0.513978	-1.00241	-0.380479	-0.313118	-1.4284	-1.21185	-1.24968	-1.41397	-1.26826	-1.66427	-0.701676	-1.57193	-1.36302	0.0458979
DYNLT3	-2.35801	-1.5943	-3.10403	-1.90784	-1.99555	-2.9489	-2.98521	-2.96348	-2.93738	-2.53361	-2.61239	-3.1207	-3.01354	-2.88072	-2.91217	-2.57088	-3.08305	-2.9872	0.259399
RPS6KA3	-1.1202	-0.285404	-0.777777	-0.213325	-0.986778	0.427665	-1.12449	-0.366473	0.022657	-1.27628	-0.885747	0.300819	-1.06536	-0.95214	-0.721252	-1.13775	-0.116451	-0.256728	0.807406
HDGF	1.36033	1.46059	1.48215	1.25125	1.3369	1.20567	1.29439	1.63115	1.14161	1.37736	1.41546	1.12982	1.54672	1.28804	1.59691	1.33272	1.24722	1.55483	0.600812
LUM	3.07634	3.36251	3.01677	3.05707	3.15622	3.09934	3.0842	3.24702	3.12329	3.16023	3.3081	3.00756	3.21269	3.29741	3.17973	3.23693	3.04283	3.2144	0.865361
PRELP	0.0255559	1.17596	1.06739	0.147086	1.57166	0.0349058	1.18178	0.68588	0.906388	0.0812468	1.29035	-0.00868396	0.520785	0.5275	0.515032	0.161473	0.403559	1.47715	0.937799
MNAT1	-2.10831	-1.94519	-2.41205	-1.99844	-2.06235	-1.96322	-1.74391	-2.58612	-1.82831	-2.44785	-1.55305	-2.55668	-2.62377	-2.51135	-1.97227	-2.04077	-1.37544	-1.68338	0.402342
NDUFA8	-0.162824	-1.87452	-0.572185	-1.65441	-1.77228	-0.458758	-0.971583	-1.95227	-1.60345	-0.480503	-1.3381	-1.72004	-0.969278	-0.00630477	-2.00937	0.167331	-0.33161	-1.03867	0.570553
HNRNPA3	-0.877945	-0.719261	-1.19757	-0.679659	-0.629262	-0.291621	-0.945621	-1.6951	-1.41945	-0.716692	-0.663982	-1.20814	-0.965761	-0.706261	-2.1067	-0.731724	-1.25196	-0.907085	0.228512
PGD	3.09673	3.18506	3.00281	3.03208	3.14024	3.13743	3.19204	2.98511	3.00077	3.09029	3.33249	3.07874	3.00418	3.28834	3.14237	2.89981	2.86954	3.20922	0.639885
HNRNPM	0.543115	0.545064	0.622666	0.821216	0.559918	0.485348	0.330823	0.810475	0.640046	0.599186	0.919432	0.844673	0.628969	0.86778	0.708254	0.655519	0.846832	0.976218	0.326026
RAP1GDS1	-1.82124	-2.92091	-2.31871	-2.60108	-2.97599	-3.6441	-2.98801	-2.33629	-3.48629	-3.21197	-3.09068	-3.61745	-3.27636	-2.50373	-2.16347	-3.04718	-3.21456	-3.05031	0.22559
POLR2H	-2.25136	-2.14406	-2.02927	-2.32479	-2.54785	-1.44485	-0.969406	-2.31361	-1.30881	-1.05629	-2.65703	-1.44207	-2.31833	-1.91039	-2.25225	-2.12138	-2.34948	-1.23632	0.686502
ARHGDIA	3.06944	3.24045	2.81505	2.94249	3.03874	3.07102	3.26238	2.94908	3.07091	3.13771	3.05102	2.95065	3.11354	3.4663	3.12091	3.09446	3.19398	3.00898	0.560524
ARHGDIB	1.75389	1.86314	1.637	1.68293	1.76324	1.78192	1.76488	1.69088	1.4927	1.88668	1.8773	1.48062	1.18294	2.19827	2.00763	2.06068	1.70194	2.02879	0.862997
AGFG1	-0.943815	-1.5743	-1.05033	-1.00758	-1.07867	-0.915313	-1.13577	-0.996376	-1.79244	-0.677845	-1.22969	-1.3682	-0.618793	-1.32718	-0.848561	-1.03807	-0.863024	-0.666115	0.542501
HNRNPF	-0.757652	-0.411969	-0.759662	-0.520895	-0.73798	-0.776428	-0.568137	-0.62306	-0.767804	-0.350647	-0.402839	-1.15711	-0.302061	-0.440495	-1.12264	-0.204782	-0.628669	-0.624962	0.972898
RIDA	0.0976834	0.597369	-0.0427461	-0.0206404	0.00223133	0.225562	-0.0493863	0.326	0.228161	0.440027	0.319156	0.322761	0.392717	0.406605	0.191006	0.817149	0.598795	0.00583443	0.431359
SMS	-2.03585	-1.53283	-1.9495	-2.06151	-1.30545	-1.27988	-0.481591	-1.6661	-1.00471	-1.22695	-1.15783	-1.9711	-2.48727	-1.275	-2.07105	-0.823465	-2.50741	-1.4918	0.49406
HK2	-0.559417	-2.07572	-0.517182	-1.19324	-0.420151	-0.475326	-0.252378	-0.933839	-0.995934	-0.400131	0.0233999	-0.711581	-0.902272	-0.560507	-0.769873	-1.28235	-2.08246	-0.712328	0.376355
HK3	0.0576647	0.280894	0.067557	-0.414881	-0.0773512	-0.0673341	0.100729	-0.0540174	-0.0102041	-0.0349029	0.647235	0.136731	-0.0201272	0.175833	-0.141565	-0.146558	-0.396208	0.118997	0.201049
EFNA4	-2.5152	-1.84124	-2.13717	-1.99605	-1.62431	-1.1922	-1.6369	-2.29064	-1.43868	-1.11499	-1.41542	-1.88249	-2.8459	-1.67079	-1.70045	-2.00114	-1.55546	-1.8475	0.397353
EFNB2	-0.249551	-0.575437	-0.305037	-1.08757	-0.236224	-0.417323	-0.376489	-0.431207	-0.464205	-0.387915	0.0305424	-0.710043	-0.336954	-0.450572	-0.487535	-0.0675136	-0.723943	-0.112458	0.892344
EFNA5	-2.03593	-1.69233	-2.29676	-1.84329	-1.40996	-2.40509	-1.72395	-2.23323	-2.21049	-0.946488	-2.52383	-2.20627	-1.59667	-1.50444	-1.00136	0.444305	-2.04334	-1.57948	0.465858
STC1	-2.85308	-2.06771	-2.16707	-3.38719	-2.77936	-1.83966	-2.6114	-2.32732	-2.31113	-2.01977	-2.53389	-3.31238	-2.47002	-2.1403	-3.56248	-2.65999	-2.30046	-2.20839	0.934584
AKR1C2	-1.40036	-1.80161	-1.01507	-1.37359	-1.99328	-2.08066	-1.69749	-1.78689	-2.32317	-1.62871	-1.04664	-1.85106	-1.49902	-1.91731	-2.52562	-1.93391	-2.24893	-1.53638	0.423293
CAPZA1	2.90995	2.75695	2.81543	2.79554	2.81844	2.83412	2.87412	2.78531	2.99484	2.83319	3.12323	2.84395	2.9856	2.94759	3.07645	2.69863	2.79092	3.17774	0.592601
CRIP2	-0.102899	-0.278942	-0.26175	-0.0568835	0.0109152	-0.195793	0.0293513	-0.316844	-0.0191802	0.0103543	0.159274	-0.364808	0.000878215	-0.119922	-0.97306	1.36359	0.405204	0.0568622	0.106705
BLVRA	1.91668	2.30496	1.89865	1.90298	1.96612	1.92506	1.87398	1.99885	2.00082	2.00856	2.14263	2.06557	1.89302	2.05928	1.76226	1.94697	2.11437	2.05787	0.50697
PPP5C	-1.20916	-1.01781	-1.47811	-1.31383	-1.55582	-1.20682	-1.19084	-1.6361	-1.33339	-1.22886	-1.3708	-1.3803	-0.998828	-0.861898	-1.05416	-1.04875	-1.26896	-1.19099	0.0815525
ARFIP1	-0.672191	-1.07868	-0.834738	-0.776319	-1.29039	-1.1162	-0.77973	-0.733231	-0.971473	-1.12574	-0.586737	-1.0294	-1.04984	-1.0962	-0.992201	-1.1807	-0.820257	-0.641422	0.697187
NUBP1	-2.19935	-2.60516	-3.01979	-2.28925	-2.34849	-3.21784	-2.21696	-3.08212	-2.50807	-2.08848	-2.35593	-3.42225	-2.63213	-2.21844	-2.92812	-1.96591	-3.07374	-2.44348	0.999582
ACLY	-0.827728	-0.448506	-0.92237	-0.795136	-1.04176	-0.762112	-0.690789	-0.673432	-0.998444	-0.766263	-0.255435	-0.83434	-0.839322	-0.954521	-0.618175	-0.906923	-0.826549	-0.6009	0.799696
METAP1	-0.988776	-1.70896	-1.96445	-1.16424	-1.33125	-1.72083	-1.32554	-1.34531	-1.03281	-1.36907	-1.91487	-1.07207	-1.65233	-1.68121	-1.82377	-1.85713	-1.86383	-1.49561	0.400395
SUCLG1	-1.83073	-1.75739	-1.72905	-1.58787	-1.49192	-1.81545	-1.68661	-1.6872	-0.568746	-1.77755	-1.15383	-1.92658	-1.90655	-1.86164	-1.47017	-1.15183	-1.87536	-1.62086	0.695327
RABGGTB	-1.81459	-1.72443	-2.3502	-1.04789	-1.99885	-1.99341	-1.6323	-1.04508	-2.28272	-2.18366	-1.84155	-2.08946	-2.36087	-1.54328	-1.32978	-1.42881	-1.35714	-1.80019	0.716295
COPB1	-3.98506	-1.32881	-4.12322	-3.7697	-3.28438	-2.90542	-2.04273	-3.76594	-3.17146	-3.55096	-2.28531	-1.30253	-3.83769	-3.4542	-2.19363	-3.93061	-3.31337	-3.04106	0.813883
COPA	-0.264422	0.195613	-0.688472	-0.46462	-0.754641	-0.618056	-1.12196	0.0687861	-0.321173	-0.651409	0.592599	-0.0813519	0.0527343	-0.851624	0.0463565	-0.695699	-0.790973	-0.101947	0.713448
CTSC	3.86881	4.10222	3.73707	3.85865	3.8295	3.81832	3.97867	3.86797	3.98843	3.93305	4.40905	4.21258	4.23513	4.27462	4.3658	3.91878	4.06377	4.10174	0.0102727
AP2S1	-2.47616	-1.72227	-2.46967	-2.66317	-2.60642	-2.86411	-2.33142	-1.70848	-2.90265	-2.67727	-2.8594	-2.70983	-2.8487	-1.72925	-2.67547	-2.79426	-2.7436	-2.74844	0.405893
PTTG1IP	0.648402	0.975529	-0.439787	0.406128	-0.119757	0.384144	1.01874	0.237412	0.353667	0.471128	0.670581	0.975796	0.958644	1.04802	0.962135	0.648576	1.05384	0.488887	0.302465
IST1	-0.0105487	0.260574	0.173414	0.406642	0.166217	0.135034	0.323738	0.413261	0.426076	0.332797	0.283003	0.24161	0.503648	0.376616	0.200784	0.12628	0.591584	0.150935	0.445559
SEC24C	-2.89084	-2.09504	-3.68513	-2.51637	-2.81569	-4.20071	-2.58241	-3.266	-3.29081	-2.75618	-2.54539	-2.9755	-3.55134	-3.43176	-2.57293	-3.52127	-2.83445	-3.15756	0.916117
SUB1	1.51389	1.8879	1.46954	1.39641	1.37886	1.59499	1.61989	1.48919	1.5973	1.26654	1.53584	1.64398	1.53754	1.48786	2.02918	1.58594	1.87658	1.55464	0.619474
CRISP3	1.18073	1.59379	1.09658	1.64347	1.62769	1.83725	1.51204	1.34463	1.72989	1.56523	1.78823	1.50833	1.70203	1.49257	1.59432	1.85101	1.54029	1.71224	0.102105
RARS1	-2.19669	-1.65243	-1.06252	-1.35193	-2.50551	-2.45208	-1.38799	-3.22591	-2.17313	-1.70674	-1.81836	-2.85274	-2.61836	-0.705939	-2.58464	-1.8678	-2.44767	-2.93837	0.859332
ATXN3	-1.76353	-1.79599	-1.77506	-1.77707	-1.7752	-1.76832	-1.76274	-1.7707	-1.76857	-1.71741	-1.78368	-1.81623	-1.76931	-1.75972	-1.77458	-1.7579	-1.7741	-1.69008	0.663669
CACNA2D1	-1.15085	-1.65182	-0.446333	-1.30106	-1.58694	-1.22948	-1.73541	-1.28465	-1.76766	-1.44342	-1.29006	-1.07255	-1.92035	-1.53264	-1.09312	-1.27125	-1.40426	-1.20999	0.522919
YARS1	-1.55057	-1.05241	-1.48652	-1.62915	-2.29274	-1.66595	-1.24072	-1.41388	-1.64845	-1.69591	-1.59273	-1.25552	-1.30208	-1.41108	-1.38537	-0.766516	-1.18993	-0.916795	0.0180939
USP14	2.09986	1.90445	2.04758	2.13119	2.12395	1.96864	2.21236	2.32982	2.12519	1.81373	2.43857	2.21058	2.28028	1.92791	2.21131	1.85421	2.25742	2.43754	0.842917
HSPA2	-1.69226	-1.44233	-1.13169	-2.05013	-2.08053	-2.52685	-1.94662	-2.27572	-2.02071	-1.55254	-2.45573	-2.15332	-1.94416	-1.7707	-2.26697	-2.4537	-2.00554	-1.86629	0.078991
ATP1B3	-0.855409	-2.44299	-2.06512	-2.13126	-2.23179	-2.51839	-2.49459	-1.90865	-1.94343	-1.57447	-0.797757	-2.39849	-2.23735	-2.24726	-2.26755	-2.15232	-1.81758	-2.55703	0.517967
FXYD2	0.0607042	1.39575	0.359807	0.844638	0.297113	0.766469	0.622816	0.608327	-0.580522	0.666621	0.655	0.130804	0.163829	0.998872	2.63598	0.895284	0.479262	1.00105	0.577023
RAD23A	0.0919037	-1.11102	-0.780676	-0.709482	-0.60935	-0.195855	-0.50608	-0.458544	-0.554743	-0.712974	-0.899192	-0.0560864	-0.609398	-0.505904	0.427997	-0.192908	-0.516687	0.435491	0.688022
RAD23B	0.764361	0.814584	0.785965	0.735747	0.824186	0.851429	0.769314	0.939465	0.922128	0.629771	1.21013	0.771453	0.946148	0.980362	0.916636	0.684452	0.85729	0.840137	0.68834
EPHB3	-1.68678	-0.899086	-1.31298	-1.16436	-1.51433	-1.19722	-0.752538	-1.43146	-0.902705	-1.13767	-1.21109	-1.80683	-0.833933	-1.17215	-1.29054	-1.24652	-0.957947	-1.18983	0.666056
EPHB4	0.593576	1.04313	0.638999	0.520797	0.475213	0.545546	0.446476	0.789618	0.925021	0.46817	1.13756	0.803644	0.882624	0.504138	1.10874	0.456079	0.716447	1.22696	0.766426
EPHA4	-0.51722	-0.844488	-1.55691	-1.39387	-1.73847	-1.26596	-1.39231	-1.38832	-1.37941	-0.89326	-0.48728	-1.27246	-1.28789	-1.01317	-1.3748	-0.837583	-1.27608	-0.753232	0.192452
ARSF	0.194088	-0.312624	-0.231403	-0.818937	-0.798067	-0.508259	-0.717972	-0.869973	-0.469645	-0.556922	-0.250052	-1.46688	-0.932487	-0.746857	-1.69259	-1.11842	-0.848195	-0.380912	0.144577
NAGLU	3.08914	3.086	2.77275	2.91727	3.1221	3.01654	3.13851	2.8483	3.00208	3.05756	3.41229	2.9559	2.95492	3.30896	2.89019	3.05088	2.81123	3.36008	0.932039
GALC	-0.942341	-0.915457	-1.18382	-0.568783	-0.727025	-0.924618	-0.365655	-1.21622	-0.901724	-0.696669	-0.76884	-1.24898	-0.834634	-0.660194	-1.04505	-0.980413	-1.40227	-0.615987	0.849352
AK2	0.544854	1.13913	0.695929	0.727182	0.818745	0.930947	0.597539	0.667413	0.834918	0.953022	0.923743	0.703752	0.987321	0.965856	0.728847	1.09772	0.754349	0.808549	0.77699
GAS1	0.301536	0.537156	0.896441	0.428931	0.203223	0.0339948	0.278934	0.477797	0.349815	0.27895	0.0853326	0.473831	0.114332	0.240934	0.366351	-0.0143395	0.473038	0.489148	0.400189
HMGCS2	-0.0709231	0.2334	-0.0262274	-0.141241	-0.114984	-0.174383	0.374058	0.106784	-0.0139777	-0.189506	0.395782	-0.21844	0.0369383	0.0817724	-0.242925	0.257175	-0.176062	-0.204636	0.678771
NAPA	-0.474947	-0.225404	-1.03965	-1.19309	-0.817602	-0.563314	-0.509931	-0.830806	-0.874288	-0.332494	0.0901002	-1.03156	-0.962946	-0.976803	-0.58812	-0.323053	-0.973181	-0.688767	0.684599
SLURP1	3.22765	3.07349	2.97216	3.03544	3.24002	3.30962	3.41298	3.29992	2.77446	3.78662	3.90611	3.63617	3.09094	4.84621	3.777	3.62854	3.157	3.59667	0.140333
MFAP2	-4.33544	-5.38353	-5.02172	-5.52782	-5.02593	-5.57926	-4.83892	-4.83861	-5.79357	-5.42615	-5.1712	-2.5042	-3.87291	-5.35822	-2.04975	-5.3716	-4.70443	-4.55269	0.45942
AIF1	-0.0825356	-0.27681	-0.0309916	-0.309633	-0.120761	-0.0600243	0.26415	-0.0739281	-0.217964	0.0996702	-0.286929	-0.238227	-0.195531	0.0834699	-0.1873	0.0863126	-0.589477	-0.416399	0.708895
EIF5	-0.849897	-0.424667	-0.437662	-0.894976	-0.746628	-0.304151	-1.03445	-0.0187712	-1.17921	-0.355527	-0.549792	-0.732606	-0.372147	0.0216103	-0.881305	-0.487626	-0.832297	-0.352259	0.925568
SLC12A2	-3.39568	-3.42544	-3.45031	-3.35918	-3.1675	-3.39517	-3.45405	-3.42733	-3.39846	-3.38597	-3.40314	-3.44458	-3.41805	-3.35716	-3.35087	-3.19065	-3.39014	-3.34634	0.177622
SLC12A3	-2.37433	-2.51962	-2.18319	-2.35901	-2.89239	-2.68292	-2.59845	-2.88401	-2.41193	-2.29653	-2.31261	-1.71209	-2.77081	-2.14268	-0.810533	-0.704564	-2.41965	-2.81561	0.608447
PSMD4	-0.82779	-0.630583	-1.03404	-1.27013	-0.764653	-1.42488	-0.924343	-1.01713	-1.0553	-0.985217	-1.06089	-1.70014	-1.20129	-0.667872	-1.21041	-1.41362	-0.975189	-1.05459	0.548991
APOC4	0.989781	1.26909	1.075	0.847127	0.684545	0.688273	0.831537	0.803659	0.47349	0.667489	1.09026	0.493069	0.398601	1.03016	0.60652	0.68941	0.302703	1.13363	0.412408
PLTP	2.2578	1.78621	1.64465	2.20294	2.0424	2.03202	2.08492	1.90848	1.5523	1.85753	2.54063	2.09983	1.92808	2.11801	2.23805	1.92965	1.64846	2.17649	0.58988
CSE1L	-3.43402	-3.9307	-2.12691	-4.18447	-4.18275	-3.56723	-2.53441	-3.37847	-2.91943	-3.44165	-2.26728	-3.99296	-3.91937	-3.32462	-4.14863	-4.02645	-3.59228	-2.58135	0.433805
VCP	0.671442	0.736728	0.638911	0.437701	0.728431	0.570076	0.961483	0.528525	0.834144	1.06416	1.26733	0.643283	0.765163	0.840091	0.763018	1.14128	0.924753	1.07522	0.0519935
MFAP4	-4.42946	-4.34748	-3.81647	-2.96259	-2.79816	-3.56946	-3.6684	-4.00629	-2.00049	-3.12696	-3.29491	-4.03616	-3.59166	-2.12061	-4.57591	-2.94261	-4.17177	-4.20982	0.593049
HADHB	-1.07533	-2.31405	-1.97189	-1.30319	-1.34934	-1.74787	-0.76243	-1.27987	-1.04822	-0.792823	-0.701882	-2.36083	-1.76391	-1.72445	-1.49513	-1.24257	-1.18847	-1.05866	0.421676
INHBC	-0.295685	-0.0547538	-0.780605	-0.972343	0.172208	-0.860756	-0.317194	0.045611	-0.268691	-0.257048	-0.61767	-0.792441	-0.27879	-0.684189	-0.108466	-0.199983	-0.298771	-0.424803	0.762921
GDF10	1.29809	1.17783	1.10368	1.16227	1.10107	0.963663	0.963963	1.10523	0.879095	0.656735	1.22139	0.947273	0.894108	0.95795	0.927256	0.808366	0.909108	1.20483	0.373048
MANF	-0.296598	-0.139254	-0.165281	0.468963	0.413552	-0.530232	-0.126005	-0.0270114	0.353054	-0.223198	-0.612237	-0.104181	0.0204138	-0.582349	0.352798	0.286066	0.133637	-0.87239	0.807975
NAP1L1	-0.388866	-1.33152	-0.68097	-0.770314	-0.811379	-0.848343	-0.636489	-0.639071	-0.569341	-1.73256	-0.437392	-1.23643	-0.944778	-0.956868	-1.32152	-1.47601	-1.42141	-0.552529	0.51689
CASP7	-1.16923	-0.340076	-1.3776	-1.89457	-1.49074	-1.58479	-1.59897	0.453641	-1.80382	-1.66441	-1.18545	-1.40025	-1.6631	-1.27297	-0.695396	-1.883	-1.67775	-1.83964	0.466041
CASP6	-1.91422	-2.14728	-2.10917	-2.65528	-2.49947	-1.7367	-1.69494	-2.69729	-2.27925	-2.0514	-1.51361	-2.24987	-2.33146	-1.73795	-2.30997	-1.86995	-2.7218	-2.0459	0.895157
GP2	-2.75906	-2.85564	-3.46828	-3.04609	1.11835	-3.13053	-0.511297	-1.00728	-2.92877	-1.19152	-2.15687	0.128768	0.0688426	-3.35914	1.76933	-2.67424	0.0259277	-3.65838	0.635493
ADK	0.148621	-0.100814	-0.0516945	-0.0239857	-0.0925114	-0.0285637	0.0813862	-0.0186028	0.124863	-0.133067	0.151333	0.0461398	0.225194	-0.198242	0.0816165	-0.0420081	0.0435145	0.427218	0.779185
LAMB2	-0.88867	0.083614	-0.803427	-0.494922	-0.534736	-0.162015	-0.191947	-0.171262	-0.648169	-0.212621	-0.511855	-0.558285	-0.455306	-0.0867305	-0.327191	-0.559147	-0.23672	-0.242795	0.923132
CDH6	-1.22988	-1.15063	-1.45751	-1.17913	-1.38038	-1.33219	-1.54371	-1.07042	-1.04814	-1.11612	-1.01414	-1.48555	-1.0313	-1.44384	-1.07354	-1.14702	-1.40423	-1.24268	0.975851
CDH8	-3.52588	-3.26842	-3.23512	-3.07688	-3.5699	-4.03538	-1.73364	-3.96052	-1.90113	-1.59482	-3.824	-3.34542	-3.13319	-3.04581	-3.33732	-1.6782	-1.58051	-2.87998	0.255978
CDH11	2.1339	2.16246	2.11038	2.16079	2.01143	2.1845	2.14426	2.35274	2.11855	2.23385	2.36683	1.9925	2.21132	2.32615	2.22206	2.19582	2.2782	2.30605	0.520047
CDH13	4.06875	3.96818	3.8304	4.00475	3.77623	3.88859	4.14897	3.92429	4.02061	4.1235	4.17997	4.13538	3.94915	4.22358	4.13774	3.78486	3.87275	3.96363	0.041509
CDH15	-2.06135	-2.56454	-2.03533	-2.42551	-1.95218	-2.42207	-1.95229	-2.19268	-1.47231	-2.2989	-2.18977	-3.04361	-2.52252	-1.85724	-2.0698	-3.37227	-2.78941	-1.95184	0.317029
TPD52	0.306963	0.389463	0.168626	0.306549	0.140472	0.0987387	0.424923	0.158911	0.252837	0.539566	0.34119	0.0740519	0.11977	0.315261	0.000514165	0.394259	0.314677	0.55931	0.331838
SEC13	-1.2768	-1.01074	-0.699952	-1.63137	-1.53269	-1.30986	-0.935562	-2.0198	-1.2101	-1.1374	-1.57181	-2.23532	-2.03005	-1.34592	-2.19137	-1.27904	-2.29714	-1.74904	0.271027
SNU13	0.354068	0.648757	0.733758	0.797429	0.687145	0.533	-0.00138009	0.462622	0.670224	0.636058	0.714635	0.344162	0.768465	0.205372	0.41145	0.206341	0.95929	0.684457	0.788258
CCL18	-1.37484	-0.987416	-1.98288	-1.25027	-1.07358	-1.3336	-1.26514	-1.66232	-1.38755	-1.24331	-0.635014	-1.03751	-0.787243	-0.664126	-1.45209	-1.4276	-1.29353	-0.931896	0.350161
NPEPPS	0.311131	0.608555	0.24239	0.165349	0.206509	0.139446	0.333046	0.044901	0.262192	0.323018	0.449763	0.0881175	0.173635	0.214264	0.00347508	0.25714	-0.0211467	0.0963002	0.246302
HNRNPH2	-2.58106	-2.12147	-3.13132	-3.48459	-3.65364	-3.59816	-3.51471	-3.44321	-2.9868	-3.25261	-3.30517	-3.02489	-3.55205	-2.19993	-2.14681	-3.66138	-3.32699	-3.57632	0.0471565
EIF3B	-2.97907	-1.26955	-0.759623	-2.69688	-2.75793	-3.33732	-2.00915	-1.46301	-2.39307	-2.89201	-2.04847	-3.16941	-2.52327	-2.18305	-2.93632	-2.11229	-1.93583	-1.99852	0.149663
BID	-1.21459	-0.859731	-1.25271	-0.996814	-1.03085	-0.85597	-1.13746	-0.613533	-1.13423	-0.701215	-0.817639	-0.969176	-0.546382	-0.651915	-1.27837	-0.96113	-1.40266	-0.427752	0.87074
GFRA1	-1.89197	-1.31618	-1.14268	-1.16616	-1.77694	-1.47853	-1.86735	-1.12672	-1.62496	-1.52658	-1.63574	-2.87051	-1.43041	-1.12687	-1.36283	-1.54233	-1.58323	-0.83561	0.435457
MARS1	-2.46291	-2.58409	-2.50453	-0.466634	-2.64515	-2.2632	-0.913727	-2.67362	-2.63227	-1.55757	-1.54475	-2.96406	-2.54466	-2.46953	-1.71674	-2.05659	-2.65701	-2.56226	0.844448
ARPP19	-0.381402	-0.20918	-0.503081	-0.388788	-0.435279	-0.0993714	-1.01896	0.148609	-1.22704	-0.845836	-0.0434394	-0.621802	-0.443627	-0.0340059	-0.00779991	-0.6438	-0.749819	0.195482	0.740844
AP1S2	-2.37009	-2.91256	-3.32497	-3.1428	-2.86523	-3.29765	-1.45751	-3.36617	-2.87298	-3.10377	-2.96989	-3.28419	-2.76368	-2.99883	-3.15248	-3.23553	-3.21479	-3.17863	0.610072
LGALS4	-0.645182	-0.573279	-0.716149	-0.729109	-0.669945	-0.457816	-0.629124	-0.591582	0.241334	-0.791062	0.521341	-0.990783	-0.434932	-0.00628513	-0.291925	0.0524551	-0.817697	-0.465694	0.849774
EIF6	-0.352616	0.138812	-0.52676	-0.594022	-0.122424	-0.343777	-0.176928	-0.666595	-0.213245	0.528691	-0.162755	-0.385751	-0.630576	0.213401	-0.286196	0.168723	-0.420746	-0.192481	0.826368
CTBP2	-3.12743	-3.09404	-3.15944	-2.98899	-3.05425	-3.05713	-3.02508	-3.15172	-3.05015	-3.00911	-3.04055	-3.06525	-3.08183	-3.18641	-3.11459	-2.73216	-3.05397	-2.94273	0.0481734
PRSS12	1.25244	1.76541	0.444322	0.572895	0.546886	0.500252	1.0813	1.57939	0.74332	0.908149	1.81771	1.85245	1.36817	1.08774	1.86876	0.342465	0.403901	1.46702	0.180455
JAM2	1.65129	-0.363263	0.948815	0.293637	0.591727	-0.107086	0.609424	0.597708	0.707526	0.0795726	-0.957666	-0.77602	-0.862623	1.49921	-0.942361	1.17618	-0.752513	0.017409	0.482461
TMEM33	1.3738	1.35124	1.02666	0.899602	0.965817	0.840791	0.748869	1.06644	0.815469	0.567768	0.679268	1.3956	1.54151	1.16339	0.385971	1.1638	0.843596	1.02203	0.720838
SYNJ2BP	-2.6973	-2.04979	-2.7967	-2.86797	-2.53097	-2.74338	-2.65709	-2.79921	-2.34055	-2.75812	-2.83105	-2.74353	-2.75958	-1.97503	-2.81236	-2.74456	-2.66266	-2.83729	0.758131
RAB25	4.13598	3.3794	2.66572	2.42338	2.33244	3.25972	2.29133	3.64298	2.30557	4.12722	5.04596	2.11416	3.57239	2.50284	1.39687	3.07573	3.91158	2.30467	0.589065
CORO7	-0.447084	-1.07431	-1.40679	-0.903217	-0.903334	-1.52171	-0.980177	-0.868334	-0.839435	-1.66061	-0.771938	-0.554316	-0.290319	-0.726084	-0.321259	-0.955418	-0.810954	-1.39262	0.367434
NUP107	-3.70674	-3.60157	-3.60155	-3.64358	-3.76278	-3.76042	-3.75523	-3.5536	-3.73592	-2.90195	-3.50709	-3.87625	-3.61101	-3.64628	-3.82985	-3.51633	-3.70459	-3.42615	0.600266
GSDMD	-1.68436	-1.56439	-1.32845	-1.4197	-1.76249	-1.73524	-1.71799	-1.04446	-1.52294	-1.11853	-1.18997	-1.08512	-1.91489	-1.07771	-1.2548	-1.65314	-1.85452	-1.11672	0.440349
EPPK1	-2.46684	-2.98008	-1.96679	-2.23198	-1.92065	-1.78343	-2.08835	-2.41045	-2.35991	-0.734641	-2.44074	-2.41864	-2.80258	-2.48821	-2.40396	-1.73481	-1.70759	-1.85002	0.267401
NRXN1	0.324396	0.40019	0.192689	0.0467166	0.0623981	0.2671	0.507239	0.817058	0.129838	0.632904	0.434496	0.413706	1.0869	0.579183	0.903053	-1.33793	0.195388	0.112896	0.0523308
FAM3B	-0.40033	-0.257574	-0.198537	-0.694901	-0.725421	-0.511285	-0.164904	-0.710345	-0.607638	-0.641309	0.0593744	-0.292957	-0.351072	-0.379112	-0.264611	-0.312016	-0.0553874	-0.107245	0.130706
MTPN	0.677067	0.462428	0.682053	0.730126	0.802969	0.633369	0.900928	0.400725	0.96245	0.698958	1.01281	0.693554	0.891044	0.945059	0.619244	0.809983	0.596711	0.595587	0.703813
DEFA1	4.37967	5.24546	4.84316	4.89409	5.15897	5.29396	4.7967	5.11995	4.58908	4.43556	4.89566	4.60033	4.55123	5.1921	6.13922	5.13066	5.14901	5.36249	0.37555
GNG2	-0.588721	-0.157966	-1.16175	-0.794026	-0.531122	-0.788426	-0.834967	-0.279963	-0.902466	-0.613027	-0.653481	-0.775239	-2.53964	-0.915839	-0.855981	-1.04448	-0.502549	0.115958	0.347791
ARPC4	1.10114	1.19307	0.868911	1.03279	0.901045	1.11846	1.39309	1.01446	0.925626	1.06345	1.42363	0.936837	0.507746	0.997981	0.634588	0.838565	0.344992	0.581675	0.0432704
DEFB1	3.53799	4.47242	3.27922	3.95054	3.73446	3.91311	3.78497	4.19698	2.7701	3.78876	4.44514	4.2077	4.1095	4.21649	4.85987	3.57202	4.16772	4.4186	0.420901
CD81	-2.72105	-2.52857	-4.04929	-3.31293	-3.11323	-2.9766	-2.90848	-2.70819	-3.94295	-2.63915	-1.79301	-1.94985	-3.06347	-2.85728	-3.56287	-2.07159	-2.89871	-1.94767	0.0993462
TPI1	3.34216	3.57144	3.36439	3.33876	3.61149	3.43663	3.33447	3.26678	3.66185	3.68228	3.98966	3.4675	3.74899	3.52422	3.7533	3.59777	3.57345	3.58172	0.186305
EIF3E	-2.15336	-0.457897	-2.36621	-2.48864	-2.45945	-2.43076	-1.60535	-2.35325	-2.60848	-2.50837	-2.22153	-1.56412	-2.65208	-2.14798	-2.44532	-1.73921	-2.32471	-1.79296	0.505751
KRTAP10-2	1.49197	1.23459	1.67145	0.668643	0.724332	2.0845	1.129	1.41956	1.78776	2.08571	1.04872	0.756038	1.13748	0.719234	2.33478	0.951572	2.97772	0.622091	0.99308
PPP4C	-0.434687	-0.367272	-1.17526	-0.854157	-1.08897	-1.12242	-1.14555	-0.88449	-0.784638	-1.19374	-0.563302	-0.932305	-1.05697	-2.50351	-1.05965	-0.379485	-1.25452	-0.967688	0.340818
GABARAPL2	-3.51308	-3.47146	-2.2678	-4.22638	-3.70308	-3.85402	-3.06915	-2.37209	-4.66851	-3.37314	-3.16424	-4.66333	-3.82664	-4.40665	-2.90712	-2.45095	-3.45599	-2.83366	0.545479
MYL6	1.43864	1.3325	1.18764	1.17342	1.33291	1.24317	1.68758	1.07161	1.39995	1.557	1.71707	0.845691	0.814338	1.07243	1.14806	1.33422	0.879712	1.47874	0.606721
ACTB	6.38832	6.49139	6.42899	6.4348	6.41512	6.32586	6.62112	6.59022	6.44157	6.75584	6.73074	6.5592	6.2513	7.18436	6.83738	6.29027	6.24003	6.46687	0.160453
EIF4A1	0.0640003	0.302895	-0.61156	-0.116958	-0.359186	-0.552915	0.0314359	-0.368767	0.0746041	0.128256	-0.024368	-0.264164	-0.819964	-1.312	-0.584888	-0.495077	-0.344086	-0.484827	0.0277949
RPS20	-0.823279	-0.732546	-0.615763	-0.721349	-0.711668	-0.65233	-1.48431	-0.33612	-0.89299	-0.823722	-0.522751	-1.24222	-0.788776	-0.868996	-0.855032	-0.618163	-0.81854	-0.291338	0.766743
PRPS1	0.116348	0.224455	0.131082	0.119561	0.0245732	0.493215	0.0931011	-0.116689	0.25778	0.314147	0.513773	-0.132932	-0.054489	0.205185	-0.385731	-0.569293	-0.441902	-0.0732432	0.0861224
PSMA6	2.55548	2.75319	2.46409	2.38925	2.46938	2.53525	2.48282	2.62102	2.6028	2.62902	2.70934	2.61577	2.63488	2.47616	2.60889	2.56059	2.57118	2.75535	0.295318
S100A10	1.12875	1.00021	1.30446	1.03632	0.950207	0.759285	0.568465	1.16079	0.889452	1.15964	0.878456	0.835864	0.966577	0.94682	1.02019	1.2287	1.23405	1.24559	0.121394
CDC42	1.84224	1.55713	1.23208	1.57419	1.44354	1.70271	1.72451	1.79911	1.86943	1.69697	1.9736	1.74251	1.50969	1.61085	1.48314	1.36067	1.56764	1.5633	0.12057
DSTN	0.744002	0.881077	0.32809	0.399115	0.282124	0.347809	0.68112	0.527456	0.262667	0.565488	0.50583	0.271962	-0.0533783	0.456787	0.582405	0.378145	0.0746676	-0.0458645	0.203088
GMFB	0.452259	0.696688	-0.211419	0.186677	0.271242	0.467645	0.14216	0.330937	0.531606	0.489649	0.774608	0.407275	0.406051	0.556173	0.424835	0.593044	0.0465711	0.621609	0.830171
RAB8A	-0.742899	-0.578756	-1.15262	-0.924103	-0.520915	-1.09333	-1.09074	-0.892076	-0.610153	-0.837355	-0.444232	-0.900121	-0.653621	-0.605808	-1.13164	-0.818708	-1.16905	-0.629928	0.986487
RAB4B	0.524929	-0.348673	-0.37948	-0.356666	-0.142651	-0.240125	-0.126165	-0.391011	0.352033	-0.170758	0.360353	-0.449302	0.0523118	-0.0455612	-0.253155	0.333033	-0.346966	0.0206058	0.967919
RAB2A	0.518364	0.238662	-0.0469245	0.0805571	0.0508222	0.171632	0.246531	-0.0981946	0.295708	0.0962614	0.228275	-0.0890201	-0.0698685	0.0566148	-0.496455	0.400906	-0.0127283	0.548776	0.253188
RAB5B	-1.57683	-1.24606	-1.58579	-1.03703	-1.54853	-0.831346	-1.38199	-2.22341	-1.38974	-0.943124	-0.0732352	-1.06197	-1.2117	-1.09873	-1.11044	-1.1612	-1.56778	-0.672577	0.11954
RAB10	0.16956	0.204313	0.151077	0.00330339	-0.0150388	0.0395912	0.253762	0.301226	0.216023	0.273815	0.342819	0.080563	0.33049	0.568789	-0.000438046	0.356741	0.632954	0.706649	0.0174012
UBE2D3	0.714434	0.838227	0.811338	0.609108	0.901538	0.840543	0.753423	0.852509	0.570771	0.751874	1.04802	0.970219	0.813321	1.35946	0.813161	0.700382	1.23511	1.09283	0.428887
UBE2M	0.428839	0.401608	0.356445	0.622662	0.419327	0.556017	0.257342	0.464557	0.548092	0.338677	0.484791	0.299786	0.312675	0.320025	0.144087	0.494808	0.355035	0.749466	0.139416
UBE2K	0.209203	0.0808377	-0.386554	-0.769349	-0.683147	-0.200535	-0.170764	-0.183017	-0.151585	-0.192972	-0.0711776	-0.586905	-0.168419	-0.475657	-0.105239	-0.489615	-0.511692	0.0664319	0.328983
UBE2N	1.8988	1.81353	1.74432	1.8373	1.85189	1.7087	1.95121	1.91654	1.74365	1.91419	2.03907	1.90959	1.81071	2.08967	1.5349	1.86628	1.85558	2.09945	0.662701
RAB14	0.58714	0.839696	0.473561	0.673831	0.469961	0.573343	0.82691	0.655698	0.816981	0.649455	0.717182	0.492883	0.780403	0.687013	0.53058	0.655748	0.560396	1.04011	0.624796
ACTR3	1.75218	1.81392	1.63666	1.50869	1.63525	1.66746	1.88065	1.59403	1.43456	1.84059	1.69005	1.36725	1.37932	1.67759	1.30613	1.15672	1.05541	1.02335	0.00539792
ACTR2	-0.691546	-0.296041	-0.648095	-0.894222	-0.704114	-0.904173	-0.588055	-0.975712	-0.726004	-0.435519	-0.301197	-0.747169	-1.0992	-0.170332	-0.595097	-0.36493	-0.780281	-0.789546	0.634448
ACTR1A	-1.18096	-1.35058	-1.6361	-1.53114	-1.13525	-1.22513	-0.610013	-1.77256	-1.53372	-1.1337	-1.17476	-1.97164	-1.76661	-1.27495	-1.67182	-1.08026	-2.23949	-1.14611	0.968417
RAP1B	1.99056	1.68053	1.54328	1.82392	1.82173	2.01453	1.80002	1.81417	1.90144	1.89843	2.19009	1.73436	1.93493	2.06558	1.88143	1.9068	1.58761	1.83421	0.509635
RAP2B	-0.310687	-0.24551	-0.893466	-0.863908	-0.729084	-0.581746	-0.35865	-0.89312	-0.814293	-0.597834	-0.0324036	-0.601398	-0.537732	-0.852362	-0.604826	-0.479433	-1.4221	-0.522859	0.674534
RPS3A	0.0432118	-0.0380541	-0.217809	0.399556	0.227007	0.238017	0.131793	0.129101	0.0716564	0.130114	0.154923	-0.258437	-0.110671	-0.00678576	-0.118039	-0.274568	-0.397774	0.145556	0.0586194
RPL26	-3.03153	-2.44179	-2.61332	-2.03537	-2.20213	-2.76486	-1.82142	-2.78212	-2.67674	-2.17447	-2.40663	-2.81091	-1.87396	-2.13821	-2.7051	-2.71417	-2.57159	-1.47772	0.832264
PSME3	-0.985826	-0.842576	-1.24357	-1.1458	-0.979099	-1.5955	-1.17616	-1.44337	-1.09776	-0.910941	-1.36465	-1.50072	-1.68721	-1.00864	-1.19715	-1.70329	-1.90653	-1.97423	0.0361979
RPL15	-0.734475	-1.10498	-1.2305	-1.09303	-1.17158	-1.10345	-1.13495	-1.25362	-1.26108	-1.25451	-1.3231	-1.1043	-1.17572	-1.17465	-0.529551	-0.6797	-1.2	-1.2161	0.644774
MAGOH;MAGOHB	-0.630597	-1.20352	-0.330157	-1.43824	-1.63378	-1.64228	-1.37006	-0.695224	-1.84316	-0.694729	-1.28257	-1.51174	-1.49583	-0.208093	-0.809156	-1.51157	-1.54416	-1.56314	0.154298
RPL27	-1.17197	-0.316887	-1.39576	-0.0503305	-0.212243	-0.9986	-0.531813	-0.310243	-1.09143	-1.25532	-0.20275	-0.799332	-1.33559	-0.277359	-1.26679	-0.912563	-0.625231	0.264183	0.695478
ATP6V0D1	-0.196638	-1.19581	-1.82017	-0.465257	-0.638984	-0.529194	-1.32338	-2.06444	-1.18379	-1.12554	-0.696364	-1.45968	-1.81093	-1.94786	-2.05796	-0.703741	-1.62552	-1.21918	0.049658
PCBD1	0.931336	0.339064	0.939405	0.532459	0.711985	0.592194	0.97697	0.776379	0.811923	0.636353	0.406543	1.19496	0.886458	1.05602	1.08773	0.381458	0.940909	0.499655	0.43166
RPL37A	-3.06043	-3.19128	-3.04032	-2.98123	-3.15234	-2.88313	-3.08606	-2.82715	-2.95345	-2.55095	-2.43099	-2.95981	-3.26066	-3.26274	-1.85584	-3.07257	-2.95565	-3.17971	0.637615
RHOA	1.84088	1.77595	1.01046	1.6465	1.78536	1.73394	1.34081	1.64185	2.02634	1.55275	2.28071	1.84656	1.58222	1.86598	2.04603	1.94405	1.88942	2.19295	0.504584
HSPE1	1.7651	1.91616	1.64635	1.86952	1.60481	1.62187	1.98388	2.10932	1.80586	1.60767	2.04805	2.39992	2.22887	2.16645	2.3107	1.89716	2.35683	2.25303	0.0651024
LYZ	5.50939	5.59496	5.56929	5.75667	5.7191	5.62998	5.69286	5.90673	5.64058	5.64464	5.95576	5.73905	5.55123	6.06022	5.7293	6.12425	5.85961	5.90613	0.115835
VBP1	-0.769925	-0.0347965	-0.842806	-0.769872	-0.817285	-0.465943	-0.987462	-0.281031	-0.73681	-0.393175	-0.600529	-0.450195	-0.967607	-0.675154	-0.28512	-0.820172	0.0811187	0.175203	0.57458
STXBP1	-2.05401	-2.87939	-3.24505	-2.08887	-3.58207	-1.3721	-3.41062	-3.28068	-3.50903	-3.4784	-3.44521	-3.05926	-3.62125	-3.59735	-1.08656	-2.28263	-2.69414	-3.76711	0.6746
B2M	6.46137	6.1371	6.70519	6.95037	6.94651	7.21449	6.31845	6.14862	6.74265	6.3934	6.97833	6.27711	6.58492	6.63265	6.49228	7.0297	5.85707	6.77582	0.326362
NPC2	1.63492	1.93774	1.94163	1.78354	1.81086	1.68489	1.62047	2.01671	1.69768	1.95053	1.91285	1.48756	1.90504	1.81811	1.79628	1.92334	1.94595	2.13947	0.52458
COPZ1	-0.766987	-1.0085	-0.985113	-1.42667	-0.795941	-1.28603	-0.847645	-0.877415	-0.772834	-0.757204	-1.08547	-0.804195	-0.606243	-0.695	-1.02898	-1.32252	-0.676285	-0.81326	0.45151
SUMO2	0.887267	1.10961	0.979196	0.881501	0.754609	0.868862	0.761666	1.01307	0.401281	0.44778	0.811804	1.10577	0.787858	0.424338	0.935605	0.741533	0.510218	1.09891	0.781364
UFM1	-0.034633	-0.927869	-0.163587	0.0330828	-0.145989	-0.349749	-0.292209	-0.0286606	-0.319709	-0.209941	-0.00969919	-0.809005	-0.931212	-0.0303573	-0.486868	-0.762744	-1.07932	0.221209	0.869546
NUTF2	1.87505	2.12196	1.32115	1.78244	1.87645	2.1708	1.97637	1.49221	1.22092	2.10711	1.85468	1.92287	1.97444	3.30488	2.15265	2.15433	1.75509	1.78066	0.196294
HNRNPK	1.33782	1.35176	1.35532	1.28725	1.19227	1.26177	1.21259	1.37501	1.47661	1.56675	1.46892	1.25448	1.31169	1.50111	1.2713	1.4107	1.22447	1.36131	0.516824
YWHAG	0.667686	0.912557	0.918148	1.0656	1.01977	1.01631	0.693493	0.634958	0.808477	1.05262	0.942657	0.650959	0.888402	0.957276	0.846412	1.30428	1.02665	1.20131	0.0104674
RRAS2	-3.1596	-2.62204	-3.12824	-3.0887	-3.23069	-3.47723	-3.24749	-3.36549	-3.15331	-3.20954	-3.17552	-3.3218	-3.30976	-3.04131	-3.15706	-3.34102	-3.23699	-3.4124	0.220258
RPS7	-0.940763	-0.487474	-0.777219	-1.06889	-0.575231	-0.612128	-0.67834	-0.660475	-0.99344	-0.282707	-0.327272	-1.06222	-0.761446	-0.83866	-0.789813	-0.508657	-0.954162	-0.349358	0.849189
PPP1CA	-0.786558	-0.67471	-0.640991	-1.02962	-1.26587	-1.07035	-0.762865	-0.785367	-1.17693	-0.713532	-1.0537	-1.33401	-1.41823	-1.19598	-1.99167	-1.31505	-1.24701	-0.916608	0.030983
PPP1CB	-0.746172	-0.581977	-0.0295489	-0.583523	-0.341346	-0.749934	-0.782089	-0.314542	-0.745774	-0.496796	-0.397273	-0.486711	-0.544539	-0.812918	-1.20505	-0.698612	-0.118393	-0.537917	0.472746
PSMC1	-1.21195	-0.855291	-1.20292	-2.06653	-0.793425	-1.57639	-1.03771	-1.22778	-0.747168	-0.647458	-0.348375	-1.18495	-0.895049	-1.23082	-0.95285	-1.31334	-1.36949	-1.07565	0.249102
PSMC5	-0.920497	-0.924592	-1.468	-1.83564	-1.24546	-0.896758	-0.660055	-1.11054	-0.804781	-0.311571	-0.616362	-1.12937	-1.80794	-0.945266	-2.50601	-0.117195	-0.7616	-0.464742	0.0483389
RPS8	-0.670096	-0.18136	-0.176314	-0.259301	-0.348019	-0.687124	-0.541796	-0.844176	-0.783214	-0.724894	-0.485326	-1.84793	-0.928309	-0.353403	-1.5395	-0.0933245	-0.666334	-0.0701103	0.240862
RPS15A	-0.563813	-0.634824	-1.0483	-0.923989	-0.81568	-0.761075	-0.0440158	-0.722114	-1.10615	-0.25578	-0.429864	-0.435014	-0.403658	-0.977362	-0.947919	-0.78002	-0.260198	-1.68594	0.665507
RPS16	0.304534	0.52337	-0.900595	0.147483	-0.0682059	-0.509417	-0.320585	-0.462252	-0.228966	0.147724	0.0210494	0.421018	-0.0010187	0.0154256	0.190448	0.0922638	0.171309	0.144494	0.50459
UBE2G1	-2.53366	2.0303	-2.25282	-2.41805	-1.954	-2.35613	-1.80556	-1.5784	-0.841213	2.30123	-0.734691	0.434329	-1.56917	-2.60353	-1.71622	-2.50663	-0.32655	0.576124	0.227811
UBE2H	-2.50138	-0.624037	-2.62389	-2.67788	-2.69457	-2.08658	-0.84777	-2.18133	-2.64094	-2.36581	-2.07235	-2.97756	-2.47378	-2.60763	-0.907788	-2.65619	-2.38836	-3.1934	0.652837
YWHAE	2.42998	2.79577	2.46446	2.5361	2.50678	2.5427	2.48881	2.6267	2.51667	2.61165	2.87086	2.62383	2.67214	2.53725	2.58837	2.62058	2.65281	2.64434	0.427931
RPS14	0.185854	0.781165	-0.706605	0.36898	0.568906	0.204529	0.516225	0.158481	-0.354371	0.117179	0.419748	-0.175462	0.716269	1.03443	-0.167472	0.296739	0.308584	0.536747	0.779262
RPS23	0.0854117	-0.618659	-0.108511	0.680558	-0.127385	0.142998	-0.000380596	0.022682	-0.229059	-0.2723	-0.385544	-0.881276	-0.450073	-0.178486	-1.41128	0.136983	-0.375953	0.308548	0.127951
RPS18	-1.25018	-0.807934	-2.09261	-1.39509	-1.38956	-1.17264	-0.82937	-1.2213	-1.24358	-0.387437	-0.541459	-1.59246	-0.848004	-0.820843	-0.974773	-0.390908	-0.09321	-0.281855	0.046667
RPS29	-5.27789	-4.28027	-4.33197	-4.46171	-4.43574	-4.10203	-4.88852	-4.47013	-4.91804	-3.81226	-4.25237	-4.49158	-4.59749	-4.13211	-4.16183	-2.29427	-5.01074	-3.91041	0.489611
RPS13	-1.72588	-1.93478	-2.39248	-1.42585	-2.10422	-2.16247	-1.76052	-1.79177	-2.06267	-1.57163	-0.54665	-2.00753	-1.31899	-2.37046	-1.5927	-0.952921	-1.24374	-1.05105	0.155668
RPS11	-1.91289	-1.74983	-4.20826	-1.81605	-1.93152	-1.60576	-2.2505	-1.60805	-1.87133	-1.69389	-1.5397	-1.8721	-1.81954	-2.22024	-1.67397	-1.76692	-1.40878	-1.14291	0.336686
SNRPF	0.4046	0.332432	0.19762	-0.275891	0.360277	0.21495	0.0461894	0.170465	-0.0148602	0.336451	0.328627	-0.411804	-0.181618	0.341043	-0.850566	0.576741	-0.34713	0.00234238	0.697495
LSM3	-0.288447	0.28188	-0.842308	0.0806452	-0.268272	-0.352153	-0.128389	0.0292775	-0.039632	0.503328	0.620605	0.00322503	-0.307222	-0.195243	0.629202	-0.679992	0.240967	-0.189954	0.419814
LSM6	-0.377432	-0.0653288	-0.268769	-0.417963	-0.0592184	-0.440128	-0.267212	-0.667951	-0.0865888	-0.0606979	-0.0724628	-0.0918068	-0.390281	-0.470042	-0.662502	-0.142506	-0.424223	-0.237375	0.188105
SNRPD2	-1.64332	-1.63968	-1.49579	-0.979205	-1.29594	-1.60691	-1.8308	-1.39229	-1.49139	-1.42682	-1.20047	-1.68954	-1.48685	-2.33583	-1.274	-1.34097	-1.57008	-1.29825	0.63028
SNRPD3	-0.698209	-0.269436	-0.519905	-0.371419	-0.636738	-0.381527	-1.0587	-0.206089	-0.597662	-0.421095	-0.240748	-0.914329	-0.576638	-0.825779	-0.721513	-0.375211	-0.275818	-0.132004	0.440183
TMSB4X	1.76838	2.52294	2.59201	2.24914	2.30755	2.1663	2.76519	2.99431	1.77156	2.64014	2.80215	2.35281	2.70262	3.37158	3.12481	2.32178	2.72507	2.62203	0.180552
ARF6	-0.0320475	-0.416333	0.0948686	0.318965	0.269483	-0.0448257	0.066857	-0.375067	-0.238008	-0.0824648	0.148639	-1.00715	-0.328081	-0.381993	-0.627733	-0.0696389	-0.0960799	-0.410447	0.310345
PSMC6	-0.411833	-2.79875	-1.69874	-1.05964	-0.813818	-3.12749	-1.50877	-1.63701	-1.52441	-2.90367	-1.28839	-1.12666	-2.51099	-1.7899	-1.90239	-2.66182	-2.21011	-2.27592	0.820596
RPL7A	-0.553182	-0.372833	-0.42243	-0.290576	-0.302221	-0.102577	-0.167673	0.0568604	-0.732183	-0.188853	-0.232578	-0.743885	-0.337224	-0.705531	-0.441494	-0.0342679	-0.149887	0.0523115	0.259083
ETF1	0.466108	0.566398	0.382788	0.485289	0.492757	0.396137	0.459006	0.349714	0.403461	0.810987	0.713754	0.46526	0.319998	0.672968	0.121715	0.444603	0.594686	0.397599	0.299787
CNBP	-3.12808	-2.86604	-3.66413	-2.76499	-3.44531	-2.77445	-3.68871	-3.06443	-3.92104	-4.43444	-3.38071	-3.08533	-3.95984	-3.95272	-3.87891	-3.45705	-3.12508	-2.52312	0.150881
RPS4X	-1.18261	-1.64135	-0.95805	-1.41934	-1.44983	-1.35769	-1.11485	-1.19936	-1.47803	-0.999411	-1.05724	-1.94387	-0.848034	-1.07064	-1.6074	-0.696661	-1.82015	-1.43083	0.98454
RPL23A	0.0584068	0.506584	-0.0937837	0.517056	0.473903	0.30253	-0.208818	0.0125712	-0.123943	0.174599	0.254242	-0.0766727	0.140659	0.464239	0.122371	0.503251	0.257551	0.804487	0.0350748
RPS6	-0.493568	0.0607612	0.0693883	0.772977	0.466058	-0.132533	-0.0842046	0.219629	0.0221694	-0.215723	0.0644823	0.228619	-0.818241	0.212139	0.538516	0.10397	0.0364335	0.544339	0.705633
H4C1	2.43791	1.80747	2.3389	2.77236	2.76173	2.35975	2.96728	2.53015	2.45126	2.63873	3.50063	2.80357	2.6756	3.21644	2.58256	3.75075	3.74751	3.77406	0.00121297
RAB1A	-2.38119	-2.45699	-4.01953	-3.97237	-3.83291	-3.86137	-2.95441	-4.50292	-2.81265	-4.13686	-2.03298	-3.2689	-4.02583	-2.36402	-3.59784	-3.18475	-2.55835	-3.18318	0.708411
RAN	1.80848	2.05105	1.96472	1.52205	1.57874	1.84793	1.8628	1.83063	1.76131	1.72371	2.2306	1.74927	1.1794	1.54069	1.4436	1.34258	1.16228	1.51853	0.00465336
RPL23	0.530142	0.616523	1.013	0.958567	1.2258	1.58415	-0.258076	0.532194	-0.154726	0.684136	1.35057	0.68591	0.13244	-1.97027	0.0459741	0.645343	0.866984	0.314418	0.02278
RAP1A	-2.22947	-2.49797	-2.61864	-2.41066	-1.81988	-2.04764	-1.89402	-2.44452	-1.53386	-1.91808	-1.93722	-1.57546	-2.60849	-2.6851	-2.88711	-2.24928	-2.17671	-2.03306	0.0111638
RPS24	-2.51748	-0.649248	-2.72254	-1.95553	-1.99269	-1.9676	-0.524133	-2.69444	-2.73713	-2.36243	-0.335688	-2.25286	-2.5488	-2.33731	-1.98338	-1.93105	0.0789672	-2.36944	0.913666
RPS25	1.45499	1.53826	1.15544	1.59856	1.49843	1.36495	1.59518	1.63055	1.39667	1.48494	1.77631	1.69516	1.74832	1.26744	1.29254	1.57026	1.71117	1.52557	0.429807
RPS28	1.94192	1.29344	1.57801	1.83452	1.76501	1.75428	1.89973	2.02028	2.0232	1.51231	1.51743	2.02109	1.95425	4.10464	1.42527	1.38189	1.78848	0.976946	0.400817
GNB1	-0.689609	-1.03326	-1.05511	-1.17501	-1.26045	-0.673179	-1.17091	-1.26753	-0.788827	-1.17339	-0.815721	-0.958291	-1.17264	-1.16647	-0.746713	-0.651865	-1.07619	-0.888194	0.901631
GNB2	0.656854	0.920843	0.953719	0.425565	0.510828	0.355658	0.990499	0.709506	1.15535	0.600013	1.36662	1.31361	0.693724	0.759432	1.19938	0.561249	0.751932	0.744036	0.0730243
RPL30	0.508972	0.710076	0.313094	0.522832	0.723601	0.411319	0.164939	0.176286	0.429212	0.225621	0.708512	-0.165216	0.0580648	0.591637	0.219212	0.29504	0.0952755	0.669306	0.631689
RPL31	-0.989408	-0.923319	-0.854844	-0.918297	-0.802029	-1.14738	-1.21531	-0.995259	-0.979038	-1.0656	-0.929669	-0.345227	-1.02926	-1.02893	-0.310733	-0.932502	-0.0403611	-0.988751	0.704536
RPL10A	-1.60235	-1.8556	-1.60559	-0.70374	-1.23585	-1.19479	-1.41195	-1.1235	-1.25439	-1.75426	-1.37758	-1.67225	-1.20427	-2.01556	-1.31754	-1.61255	-1.51605	-1.56735	0.0594393
RPL32	-2.65693	-2.57224	-2.65666	-2.57307	-2.61585	-2.7627	-2.05254	-2.5862	-2.7935	-2.69696	-2.60406	-2.58861	-2.19068	-2.6744	-2.63126	-2.22316	-1.95572	-2.6191	0.399476
RPL11	-1.71908	-2.02786	-1.61423	-1.32152	-1.61184	-1.64351	-2.43715	-1.64625	-2.23052	-2.81437	-1.73699	-1.98574	-1.87798	-2.59469	-2.31934	-1.67791	-2.5034	-2.63476	0.209986
RPL8	-2.6742	-1.64352	-2.00899	-2.19075	-2.03976	-1.96994	-2.59807	-1.93778	-3.94509	-1.4919	-2.0456	-3.0606	-2.47505	-1.87205	-3.01835	-1.30112	-1.83786	-1.19686	0.241425
PPIA	4.70721	4.77167	4.75875	4.5967	4.73765	4.6634	4.4615	4.33477	4.63443	4.60883	4.66645	4.29626	4.49689	4.867	4.75417	4.67513	4.45463	4.73987	0.243668
FKBP1A	2.23416	1.24007	1.64192	1.6756	1.77823	1.65075	2.12689	1.5128	1.32866	1.93187	1.93785	1.85667	1.95104	1.78249	1.75091	2.28392	1.82332	1.68508	0.802645
RPS27A	6.09434	5.92833	5.98675	5.75733	5.77285	5.92518	6.03649	5.95064	6.09386	6.1309	5.84101	6.20334	6.03421	5.68446	6.11408	5.88896	6.1773	5.59156	0.590561
GRB2	-0.292111	-0.113991	-0.281349	-0.164549	-0.128593	-0.311589	-0.209985	-0.287242	-0.0522874	-0.313873	-0.0664101	-0.199661	-0.235509	-0.270158	-0.395806	-0.241782	-0.13574	0.0988427	0.486376
TRA2B	-2.65026	-3.19863	-3.07696	-2.88099	-3.14606	-3.0426	-2.89498	-2.28862	-3.06209	-2.885	-3.09115	-2.86161	-3.25224	-1.25431	-2.885	-2.58677	-2.51593	-2.78936	0.688848
RAC1	1.36768	1.65962	1.70895	1.78427	1.47717	1.29158	1.56856	1.7456	1.9229	1.16156	1.9383	1.47832	1.23211	1.27457	1.16605	1.44947	1.23838	1.52579	0.186872
AP2B1	-0.122039	-0.498622	-0.648355	-0.44612	-0.188417	-0.265092	0.00850252	-0.0578035	-0.105787	-0.296682	-0.144288	-0.366823	-0.270809	-0.336601	-0.244191	-0.370716	-0.0156554	0.0664402	0.143196
VAMP2	-2.85862	-2.8814	-3.43137	-2.47138	-3.11214	-2.55789	-2.67897	-3.05215	-2.89254	-2.67483	-2.29492	-3.39363	-2.83824	-3.17916	-1.04634	-1.59441	-3.43634	-2.12832	0.773543
GNAS	0.0251461	-0.177615	-0.131291	-1.00356	-0.0221195	-0.503675	-0.293563	-0.242359	-0.316748	-0.00163212	-0.187589	-0.453632	-0.282879	-0.171235	-0.515442	-0.343773	0.00408575	-0.921629	0.631278
GNAI1	-0.408204	-0.126703	-0.667547	-0.155494	-0.233037	-0.396841	-0.155931	-0.630166	-0.0501102	-0.435733	-0.0262333	-0.398285	-0.944041	-0.289376	-0.584173	-0.164433	-0.716104	-0.445895	0.596158
PPP3R1	-0.774125	-0.896995	-0.746708	-0.823362	-0.246951	-0.801104	-0.864872	-1.0826	-0.501132	-0.722587	-0.680959	-1.04588	-1.19129	-1.11889	-1.05826	-0.999905	-0.827522	-0.962005	0.160001
YWHAZ	3.70987	3.79057	3.6694	3.49971	3.57465	3.46726	3.52548	3.16361	3.49119	3.57416	3.62314	3.36653	3.37086	3.713	3.21482	3.77044	3.36906	3.46497	0.309953
PPP2R2A	-2.29063	-3.14081	-3.26997	-3.96214	-2.57746	-2.48686	-2.6461	-2.36934	-2.11353	-2.78149	-2.97565	-1.76265	-3.33739	-2.86663	-3.2539	-2.9738	-2.99448	-3.19513	0.377433
DYNLL1	0.00904956	0.328239	0.187189	0.246253	0.248738	0.15664	-0.323457	0.230327	0.281078	-0.020353	0.253318	-0.0617732	-0.683152	-0.247023	-0.521449	-0.073873	-0.0746549	0.154683	0.0116162
DYNLT1	-4.82286	-4.89741	-5.74741	-5.02129	-4.93004	-4.20567	-5.41749	-5.85503	-5.41638	-3.57069	-3.11427	-3.5852	-5.88949	-3.88056	-5.65935	-4.31805	-4.80237	-4.58219	0.00815892
RPL38	-0.646489	0.0380194	-0.853555	-1.00874	-0.33466	-1.01972	-0.990342	-0.560699	-1.57512	-1.50326	-0.840168	-0.894207	-1.03864	-0.12619	-1.84727	-0.637877	-1.05612	0.326756	0.630384
SKP1	1.59962	1.49026	1.5478	1.50846	1.44653	1.61685	1.57149	1.51267	1.68726	1.4284	1.70331	1.57982	1.34878	1.53498	1.97447	1.41109	1.42627	1.80368	0.98697
GNG5	1.0271	0.436892	1.37935	0.00166585	0.0549827	2.38625	1.51348	0.21086	1.24589	0.265453	0.794488	1.30431	1.20466	1.23132	1.4323	0.260968	0.020464	0.330132	0.564923
RPS21	0.689278	-0.324887	0.683401	0.978728	0.648968	0.192994	1.36665	0.958381	0.205331	0.654979	-0.274364	1.55459	1.13415	0.802343	1.31164	0.590257	1.16425	-2.05362	0.669999
EIF5A	0.416795	1.16263	0.614333	0.739219	0.885836	0.920331	0.669325	0.581177	0.488925	0.952368	1.70062	1.1517	0.919022	1.34444	1.33868	1.06045	0.839641	1.34448	0.0512961
RACK1	-0.449906	0.130258	-0.187998	-0.204577	-0.439455	-0.24483	-0.198759	-0.365602	-0.865429	-0.215677	-0.199281	-0.549259	-0.0483615	-0.858047	-0.400878	-0.682817	-0.249323	-0.300232	0.787942
ACTG1	1.49036	1.35765	1.46888	1.5469	1.68144	2.01044	2.06311	1.08388	1.36743	2.59084	2.63154	1.03183	1.15883	4.19521	3.12951	2.33049	0.927897	2.17547	0.394324
UBE2I	0.567455	0.702428	0.324653	0.599582	0.516288	0.144228	0.188017	0.460702	0.809644	0.941122	0.627894	0.578122	0.442264	0.975506	0.255594	0.748063	0.369532	1.00347	0.741369
TMSB10	1.10659	1.64918	0.774542	1.70699	1.49342	1.86253	1.84305	1.83107	1.77229	1.67903	1.7684	1.27469	1.55237	1.54998	1.39637	1.50017	1.49192	1.01125	0.0876946
PPP2CA	0.742402	0.858041	0.509353	0.362216	0.759528	0.397389	0.460472	0.297483	0.759697	0.320128	0.537512	0.187312	0.0990254	0.594583	0.0727942	-0.143633	-0.137445	-0.231428	0.00406897
YBX1	-4.07384	-2.30071	-3.1056	-2.92175	-2.99084	-2.8425	-2.54735	-2.85279	-3.30155	-3.37272	-3.11267	-1.43777	-2.58864	-3.35937	-2.46225	-3.89396	-3.52585	-2.45155	0.868934
TPM4	0.598028	0.697551	0.537852	0.480582	0.48392	0.395251	0.488221	0.832661	0.545363	0.777253	0.505146	0.17773	0.698031	0.603363	1.02204	0.619785	0.450453	0.537528	0.332873
ACTC1	2.21403	2.69239	2.25998	2.43268	2.47645	2.60837	2.41373	2.13842	1.95477	2.58668	2.81608	2.22486	1.93507	4.20216	2.50235	2.76956	2.13936	2.82627	0.728695
UBE2L3	-0.602862	-0.353972	-0.704342	-0.479835	-0.469356	-0.540314	-0.584194	-0.328794	-0.513326	-0.390335	0.0938491	-0.441093	-0.394208	-0.321855	-0.282986	-0.590167	-0.326718	-0.0943973	0.346133
EEF1A1	3.3058	3.42285	3.42379	3.28006	3.40756	3.33682	3.354	3.5328	3.57148	3.57344	3.58883	3.4413	3.44871	3.66021	3.24979	3.4651	3.20732	3.33819	0.307773
FKBP1B	2.32417	2.59604	2.51389	2.6383	2.15797	2.58234	2.29076	2.77408	2.45324	2.41482	2.44369	2.40779	2.66715	2.24091	2.36426	2.29138	2.48146	2.19573	0.881884
ACTA1	2.65129	2.66505	2.69721	1.73093	1.07969	2.82779	2.09276	1.17279	2.50169	2.93311	2.95888	2.35134	2.50484	3.26005	2.82066	3.01851	2.29242	2.894	0.128627
TUBA1B	1.55943	1.5586	1.27219	1.25584	1.39527	1.48431	1.70092	1.4325	1.42924	1.87199	2.01683	1.54496	1.31637	1.55236	1.64027	1.5317	1.33122	1.6645	0.127497
[truncated: 1,788 more rows]

## Sheet: Supplementary table 3
Table 3: Normalised, imputed, relative protein abundances for pyelonephritis (PN) patient 79 (Patient 2) with ANOVA p-values. P-values < 0.05 are considered significant
Abbreviation: D: Direct freezing, F: Freezing and thawing (3 cycles), 4_30: 4°C for 30 minutes, 4_3: 4°C for 3 hours, RT_30: RT for 30 minutes, 4_3: RT for 3 hours																				Abbreviation: D: Direct freezing, F: Freezing and thawing (3 cycles), 4_30: 4°C for 30 minutes, 4_3: 4°C for 3 hours, RT_30: RT for 30 minutes, 4_3: RT for 3 hours																				Abbreviation: D: Direct freezing, F: Freezing and thawing (3 cycles), 4_30: 4°C for 30 minutes, 4_3: 4°C for 3 hours, RT_30: RT for 30 minutes, 4_3: RT for 3 hours
Gene name (Protein group)	79_D_1	79_D_2	79_D_3	79_F_1	79_F_2	79_F_3	79_4_30_1	79_4_30_2	79_4_30_3	79_4_3_1	79_4_3_2	79_4_3_3	79_RT_30_1	79_RT_30_2	79_RT_30_3	79_RT_3_1	79_RT_3_2	79_RT_3_3	P-Value(ANOVA)
TMA7B;TMA7	-6.04452	-4.21213	-3.58695	-1.86374	-4.92451	-3.69367	-5.40514	-5.54553	-5.46222	-5.65208	-4.21251	-5.45464	-5.37656	-3.9707	-4.2036	-1.6051	-4.53457	-4.28588	0.246862
IGKV3-7	3.51791	3.3848	3.5079	3.69858	2.74441	3.61722	2.99728	3.61237	3.51908	3.06807	3.55489	3.63537	3.24499	3.23319	2.42402	3.32332	3.42685	2.1475	0.581919
IGLV4-69	-0.812432	-0.0186533	-0.297071	-0.228683	-1.10531	-0.273688	-0.901154	-0.496039	-0.470579	-0.696655	-0.0157031	-0.757105	-1.23411	-1.07122	0.548371	-1.62366	-0.304149	-0.688599	0.935991
IGLV8-61	2.52264	2.78774	2.86359	2.83127	2.07293	2.80342	2.3835	2.84527	2.91254	2.53899	2.86455	2.50029	2.39243	2.79466	3.10723	1.83775	2.44956	2.77834	0.710958
IGLV4-60	-2.74587	-2.85741	-2.51577	-2.38519	-2.72783	-1.62268	-2.72741	-2.21185	-2.93462	-2.16968	-2.77698	-2.85568	-2.53652	-2.55041	-2.79946	-2.9555	-2.79546	-2.7411	0.438883
IGLV7-46	-0.532932	0.229219	-0.197483	-0.456285	-0.476303	0.223916	-0.588857	-0.47924	0.0856155	-0.295581	-0.497791	-0.526453	-0.454943	-0.25065	0.328047	1.27736	-0.298692	-0.52384	0.793873
IGLV5-37	1.34926	1.50709	-3.03294	1.56961	0.349355	1.57637	-0.536034	1.38819	-2.12235	0.929633	1.75761	1.35922	-0.388489	1.40089	0.782593	-1.74124	-0.688349	-2.05434	0.195895
IGLV2-18	3.67673	3.37626	3.60492	3.5618	2.6852	3.43659	2.10099	3.55898	3.86798	3.07447	3.48181	3.31947	3.00714	3.56336	4.12309	3.83031	3.65042	3.49281	0.777128
IGLV3-16	-0.21552	-0.154283	0.0407388	0.0935729	-0.320225	0.55615	-0.429825	-0.0305406	0.273151	0.0808328	-0.326559	-0.128471	0.032535	0.011286	-0.0362151	-0.423843	-0.163364	0.262228	0.905401
IGLV3-12	3.2331	2.96649	3.22373	3.10351	2.63674	3.17427	2.53815	3.34398	2.93592	3.11036	3.16897	3.12193	2.81873	3.18154	2.84557	1.89045	2.29186	2.86785	0.0701149
IGLV3-10	3.0989	3.03708	3.24025	3.33891	1.94712	3.01017	1.98262	3.29188	3.20544	2.82552	3.03011	2.91418	2.62133	3.22792	3.09837	2.1925	2.74391	2.93063	0.828113
IGLV3-9	3.59229	3.74282	3.6654	3.89461	3.11861	3.78627	3.20744	3.72127	3.65769	3.45781	3.66862	3.2379	3.31224	3.83867	3.63531	2.54798	3.52007	3.5777	0.661708
IGKV2-28;IGKV2D-28	4.56511	4.59692	5.00265	4.72134	4.2386	4.6825	4.33211	4.93444	4.86173	4.31607	4.8221	5.00439	4.04484	4.74168	3.84311	3.30369	5.15128	4.96589	0.806522
IGHV3-64	1.06406	1.50371	1.11102	1.53459	0.176795	0.996813	0.966763	1.21181	0.974641	0.772628	0.768449	0.583237	0.581994	1.12411	1.02669	1.65652	1.20287	0.811441	0.508154
IGHV4-4	-0.319258	-0.594138	0.583197	0.682801	-0.186105	-0.143135	0.307459	0.693811	0.354463	0.180294	0.406062	0.910793	-0.903093	0.0179115	-0.876279	0.554834	0.496225	-0.450156	0.137552
IGKV2D-29	6.86582	6.63828	7.03018	6.90645	5.515	6.88258	6.29441	7.01945	6.82009	6.69985	6.89875	6.84155	6.1879	6.83829	6.41716	6.082	6.74516	6.69794	0.740529
IGKV1-27	1.029	1.53403	1.60773	2.16769	0.913329	1.12641	0.717761	1.37703	1.58081	1.14586	1.42535	1.68976	0.650849	1.94524	0.538753	1.8964	2.48023	1.40139	0.51027
IGKV2D-30	2.33422	2.61524	2.21162	1.52597	1.80967	2.40678	1.78052	2.41387	2.0103	2.21671	2.35283	2.19479	2.25078	2.25744	2.81638	0.58448	2.37229	2.12096	0.41752
IGKV1-37;IGKV1D-37	1.15266	1.0631	1.71223	1.9295	0.533252	1.19297	0.634968	1.38479	1.09727	1.05276	1.04784	1.27253	0.153722	1.65142	0.651693	1.26093	1.54403	1.25099	0.768094
TRAJ3	-1.05054	-1.87464	-0.159291	-1.85711	-1.24739	1.66133	-2.14038	-2.02566	-1.78966	-1.81007	-1.40333	-0.707093	-1.11395	-2.2649	-2.76664	-2.31642	-1.97278	-1.3875	0.333728
IGLV5-45	2.00282	1.55581	2.03727	1.84138	0.876401	1.6449	0.784365	1.79067	2.03376	1.6976	1.91015	1.50793	1.50601	1.95385	2.20735	0.834838	1.36012	1.82797	0.592896
IGHV4-30-2	-2.14764	-2.50349	-2.46979	-0.667791	-2.03886	-0.683347	-1.87926	-1.75682	-1.1501	-2.47993	-1.69783	-0.552919	-2.48813	-1.60455	-2.21299	-1.37322	-1.40753	-1.92745	0.204558
IGKV3D-15	2.86776	3.11994	0.90993	2.32993	3.99312	1.96584	1.80488	2.13355	1.35133	1.81894	2.27276	2.38609	3.9495	1.4881	2.77759	1.40877	2.89885	3.19536	0.776639
IGKV1D-8	-0.301605	-0.540453	0.817378	1.05123	-0.505423	0.0506475	0.324851	0.828416	1.0123	-0.617325	0.291269	0.67692	-0.825361	0.538274	-0.415066	0.0212843	0.60258	-0.0779443	0.586748
IGKV2-40;IGKV2D-40	1.46277	1.05406	2.33977	2.09201	0.328356	1.36661	0.973325	1.94956	2.22245	1.33235	2.07384	1.83735	0.748619	1.64309	1.1492	0.864485	2.08788	1.95788	0.816312
IGHV1-45	-0.908389	0.362264	0.027934	-0.237102	-0.914103	-0.387959	0.0337894	-0.493699	-0.451308	-0.626574	0.0803183	-0.624884	0.0750563	-0.088664	0.147649	-1.41015	-0.379762	-0.513154	0.351063
IGHV3-49	2.09627	2.14406	2.31494	2.47064	1.44711	2.27498	2.02736	2.40066	2.14154	2.13161	2.0256	2.12128	2.10592	2.42813	2.51197	2.2141	2.04745	1.99339	0.771948
IGKV6D-21	-0.711789	-0.21694	-0.367656	-0.63229	-1.27699	-0.835483	-1.17083	-0.338959	-0.360164	-0.859805	-0.660149	-1.13042	-1.2582	-0.648042	-0.578182	-0.740649	-0.724536	-0.802157	0.451296
IGKJ1	1.74146	2.02003	2.06829	2.04456	1.33067	2.11015	2.05035	2.1368	2.17257	2.25903	1.38251	1.92127	1.52067	1.63658	2.71417	0.949733	1.76439	1.84809	0.664309
IGLV1-36	1.18234	1.7773	2.23059	2.19017	1.71398	1.69906	1.74666	2.36628	2.30548	1.0927	2.60068	2.34037	1.42727	1.55857	1.66071	1.82274	2.00326	2.1027	0.63073
IGHV6-1	2.8434	2.7995	2.27191	2.65045	1.93513	2.57757	1.98419	2.66902	1.69213	2.58955	2.59116	2.31157	2.09416	2.44954	2.50419	1.63703	2.25624	1.32163	0.112474
IGHV3-15	0.749313	0.601211	-0.0256322	1.12466	-0.0182856	0.954093	0.0906441	0.679479	-0.0885156	0.927778	0.713022	0.518812	-0.165864	0.818697	1.75907	0.832719	0.489372	0.330682	0.79544
IGHV3-21	-3.4883	-2.38879	-2.37959	-1.72371	-3.47634	-3.10631	-1.37616	-2.05564	-2.17013	-2.62195	-1.44569	-2.07118	-4.67072	-1.96978	-3.40695	-1.32907	-2.51629	-3.39449	0.398932
IGHV2-26	-0.229611	-0.770944	0.272561	0.711624	-0.513016	-0.127318	0.00491276	0.200579	0.276366	-0.534567	0.172392	0.0657689	-1.19739	0.0438993	-1.31865	0.263376	0.130687	-0.407562	0.277447
IGHV3-73	4.61201	4.49548	4.51204	4.74187	3.69395	4.54282	4.14697	4.48078	4.30258	4.60412	4.40672	4.17626	4.1441	4.62777	4.90247	4.27446	4.29526	4.22419	0.761658
IGHV3-74	3.12123	2.9663	3.55564	3.42206	1.86397	2.92657	2.81793	3.27047	3.0607	3.04877	3.17528	2.8567	2.9288	3.18907	3.24165	3.4359	3.23738	2.93985	0.689227
IGHV3-43	3.60599	4.07363	3.87952	4.12197	3.20065	4.1278	3.5435	4.0689	3.78631	3.89331	3.81776	3.57245	3.63871	3.92018	4.24188	1.68507	3.67578	3.64581	0.380856
IGLV9-49	2.15154	1.92012	2.23967	2.22233	1.39468	2.19642	1.66838	2.07877	2.19238	2.02307	2.04129	1.78482	1.70232	1.9721	2.24637	0.5431	1.9589	2.21381	0.787399
IGHV3-72	4.98205	5.1921	5.70677	5.81868	5.04194	5.57719	5.06333	5.6868	5.60056	5.34508	5.44865	5.3553	5.07605	5.56485	5.97299	4.78733	5.522	5.14664	0.788011
GATD3B;GATD3	-0.268437	-0.544677	0.162245	0.0453138	-1.45239	-0.0176995	0.482419	0.331541	0.214342	0.240794	-0.0908231	0.101788	-0.606216	-0.0999795	0.747673	0.478891	-0.00379019	-0.170623	0.464471
IGKV1D-13;IGKV1-13	-0.673418	-0.257446	-0.218023	-0.0232306	-0.398488	-0.388917	-0.435435	0.191067	0.139598	-0.149707	-0.00260434	0.00943758	-1.34767	-0.0584799	-1.2164	-0.390804	-0.130686	-0.269185	0.117257
IGHV1-69D	-2.12676	-3.42028	-3.37791	-2.45126	-0.375762	-2.01661	-2.81613	-3.18422	-1.72551	-3.85522	-3.16676	-3.57189	-2.4732	-1.77444	-4.16385	-1.58771	-2.24159	-3.73144	0.293185
IGKV6-21	0.612296	0.778405	0.896908	1.09787	0.552954	0.936596	0.389736	0.418716	0.789665	1.06659	0.756969	-0.05188	0.550189	0.674584	0.620133	1.04489	0.66711	0.208942	0.835355
IGKV3D-20	5.42356	5.0013	5.79794	5.71397	5.14199	5.77085	5.2288	5.80027	5.59867	5.49303	5.31549	5.35763	5.30962	5.62159	5.50702	6.13196	5.87037	5.71128	0.279546
IGHV1-3	-0.641048	-1.99601	-0.880145	-0.509462	-2.7325	-1.33977	-1.88626	-0.633525	-1.43425	-2.00855	-1.0513	-1.42721	-1.14262	-0.308666	-0.358441	0.271866	-0.382337	-1.70603	0.530266
IGHV1-18	-1.3621	-0.74224	-0.299223	0.328609	-1.17087	-1.08412	-0.389441	0.146666	-0.529064	-0.831612	-0.444952	-0.0685881	-1.94388	0.00505742	-1.20359	0.898806	-0.159407	-0.924062	0.591847
IGHV3-20	-1.50312	-1.16041	-1.31357	-1.26916	-1.48555	-1.1072	-0.859964	-1.22671	-0.968538	-0.433082	-1.74324	-1.56228	-1.0991	-0.642154	-0.35762	-1.78096	-1.63828	-2.49016	0.04076
IGHV1-24	-2.20525	-2.45069	-1.87139	-2.16864	-2.44056	-2.49487	-2.21479	-2.09626	-2.33272	-2.3166	-2.25572	-2.55963	-2.5266	-2.26682	-2.10606	-1.52257	-1.5271	-2.32883	0.143725
IGHV4-28	0.239756	-0.0847727	-0.129136	0.54906	0.2458	-0.0866245	-0.251549	-0.250707	-0.353558	-0.267476	-1.00981	-0.048236	0.185127	0.631325	1.09093	0.673429	0.124244	-0.382873	0.0540592
IGHV3-35	3.54983	3.63542	3.88544	3.80301	3.26353	3.59133	3.2087	3.88385	3.4074	3.57541	3.76494	3.39734	3.2536	3.53842	3.91324	1.00764	3.54585	3.48824	0.454331
IGHV3-38	1.50113	0.73659	1.45756	1.69944	1.13325	1.65001	1.34869	1.65381	1.43237	2.03973	1.10202	0.666111	0.549997	1.76682	2.57516	1.84865	1.30151	1.04123	0.956114
IGHV5-51	2.70894	2.54973	3.03228	3.35279	2.08489	3.04897	2.65264	3.05111	2.96941	2.94733	2.85517	2.72988	2.2956	3.11207	2.54252	2.78579	3.06922	2.8661	0.948862
IGHV1-58	-3.16352	-3.47697	-2.9344	-3.73282	-3.52741	-3.9441	-4.02035	-3.72713	-3.86235	-3.52347	-3.46653	-3.45461	-3.8949	-1.64744	-3.35122	-3.60828	-3.89823	-3.65216	0.274793
IGHV2-70D	2.23407	2.28523	2.71531	2.64407	1.56842	2.49733	2.13462	2.48746	2.47792	2.57068	2.39951	2.19759	2.1814	2.56226	2.43328	1.93399	2.3232	2.52149	0.970636
IGKV3D-7	2.07198	1.93416	2.0242	2.20613	0.181734	2.35795	1.47224	2.33306	2.00622	1.72048	2.221	1.86321	0.817667	2.28605	1.34692	1.05052	1.87093	2.23469	0.894556
IGKV1-8	2.18625	2.68198	3.05118	3.24882	1.69726	2.66622	2.05824	2.60831	2.86961	2.5726	2.92081	2.81461	1.67336	3.10651	1.47153	2.95637	2.74637	2.82285	0.625149
IGKV2-24	4.39314	4.12698	4.38456	4.47907	2.96033	4.08921	4.02927	4.44463	4.16351	4.0438	3.86228	4.1149	3.08976	3.9732	2.86034	3.50718	4.2375	3.95848	0.17232
IGKV1-12;IGKV1D-12	2.44764	2.47126	3.5909	3.48771	1.87918	3.08201	2.93974	3.45097	3.46623	1.96894	3.26698	3.73731	2.21779	3.5975	1.2257	3.67583	3.90661	3.28206	0.47902
IGLV5-39	1.0323	0.463321	1.14041	1.15327	0.497635	1.42221	0.515914	1.11542	1.02531	0.945014	1.16071	1.12776	1.0168	1.42628	1.52759	1.42645	0.917109	1.4921	0.458272
IGHV3-64D	2.53111	1.93137	2.57538	2.73723	1.52277	2.51842	2.29654	2.55499	2.38917	2.61557	2.22725	1.51531	2.06484	2.48603	2.92235	1.61285	2.2249	2.12517	0.737519
IGHV5-10-1	-3.19013	-4.73999	-4.4799	-4.82558	-4.88453	-5.01769	-1.83287	-4.50177	-3.08136	-5.55248	-4.63688	-4.60137	-4.56363	-3.36045	-1.29411	-1.10887	-3.83984	-4.69961	0.24878
MMP24OS	-3.52118	-5.09217	-3.07154	-4.7883	-5.50212	-3.62074	-4.22076	-3.87793	-4.33963	-2.82914	-4.94101	-2.01415	-4.87334	-5.40635	-4.44148	-5.61718	-5.51823	-4.52081	0.173587
SMIM32	0.685221	-0.238243	0.691019	0.0311878	-0.632999	-0.137712	0.304943	0.880886	1.36542	-0.115533	0.493769	0.0207468	-0.134427	0.543405	-0.393331	-0.203514	-0.0978965	0.178232	0.0853317
ERFL	1.5991	1.31512	1.31731	1.39796	1.23733	1.22752	0.622867	0.213156	1.44257	1.67405	1.09695	0.285334	-0.366385	1.68725	-0.414906	-2.24467	0.793963	0.849343	0.347291
UBA6	-2.06102	-2.01157	-2.06366	-2.44436	-3.55206	-2.42074	-1.36854	-2.834	-2.08163	-1.39476	-2.42947	-2.61898	-1.40173	-2.08021	-2.18229	-1.72318	-2.18754	-1.8495	0.345705
[truncated: 4,066 more rows]

## Sheet: Supplementary table 4
Table 4: Normalised, imputed, relative protein abundances for pyelonephritis (PN) patient 80 (Patient 3) with ANOVA p-values. P-values < 0.05 are considered significant
[truncated: 4,109 more rows]

[truncated: 5 more sheets: Supplementary table 5, Supplementary table 6, Supplementary table 7, Supplementary table 8, Supplementary table 9]
