# Supplementary material
Source: Research Square preprint supplement (doi:10.21203/rs.3.rs-8988536/v1)

**A**

## REACTOME Complement Cascade

Patient ID 78

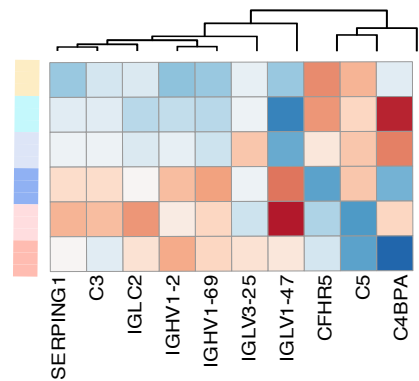**B**

## REACTOME Complement Cascade

Patient ID 81

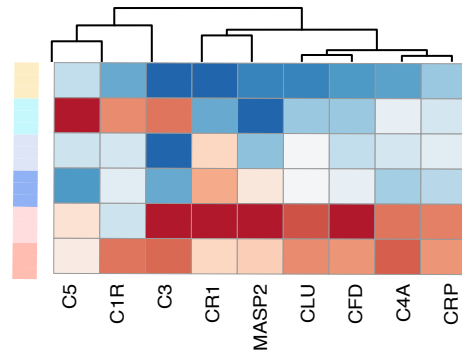**C**

## REACTOME Neutrophil degranulation

Patient ID 79

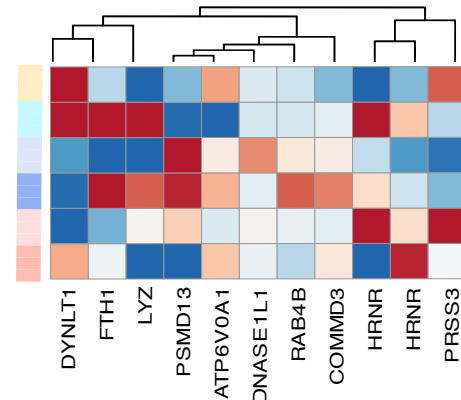**D**

## REACTOME Neutrophil degranulation

Patient ID 78

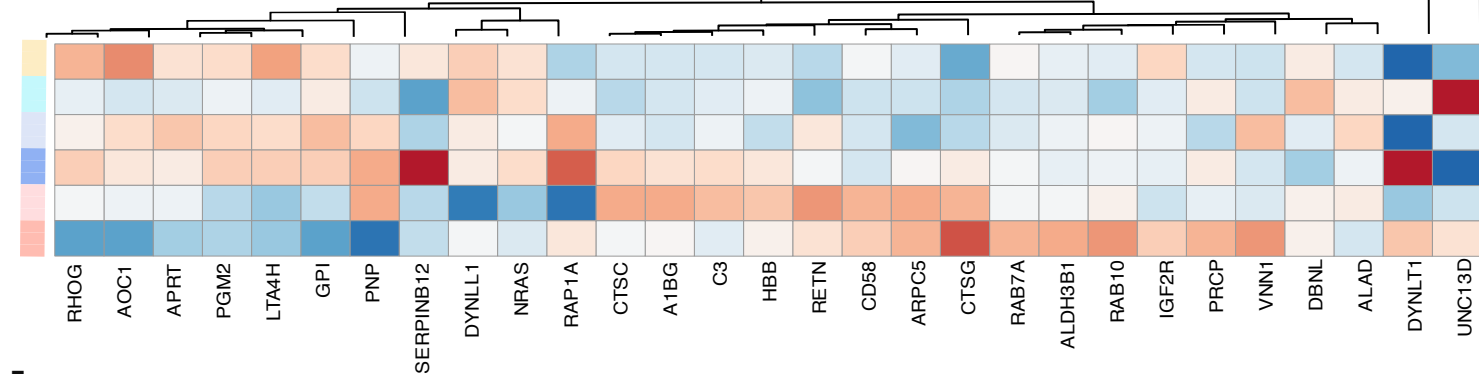**F**

## REACTOME Neutrophil degranulation

Patient ID 81

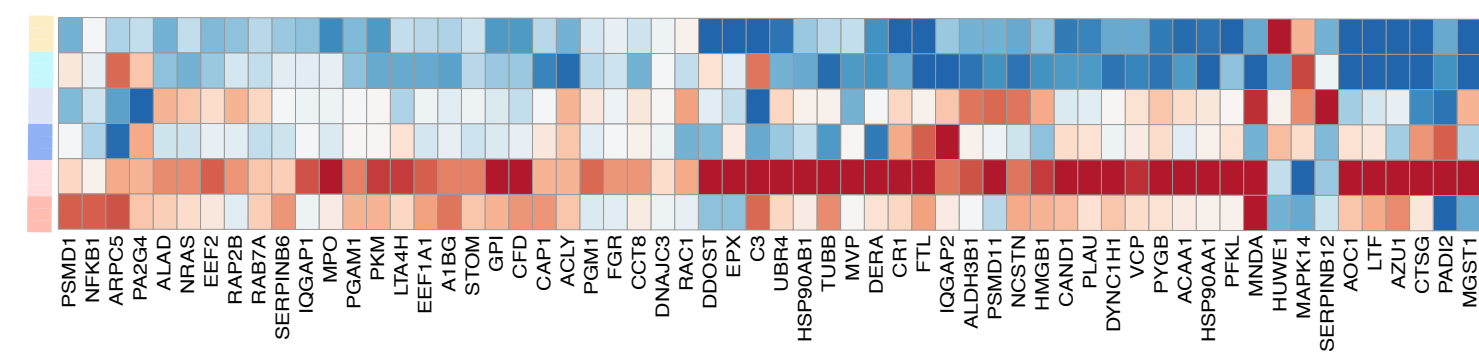

Supplement: Supplementary file 2 [file 657097c7e552036568a494d3.pdf]
