# Supplementary material
Source: Research Square preprint supplement (doi:10.21203/rs.3.rs-8988536/v1)

**A** Cathepsin G (CTSG)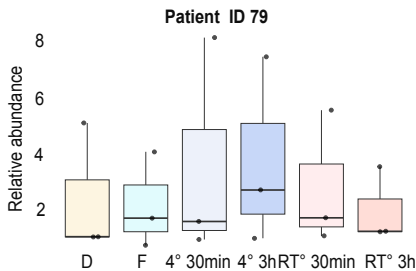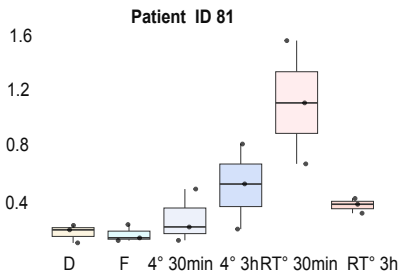**B** Complement C3 (C3)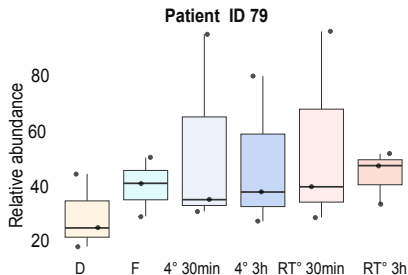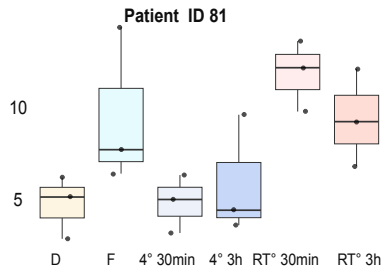**C** Complement C1r subcomponent (C1R)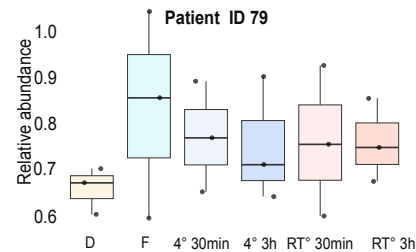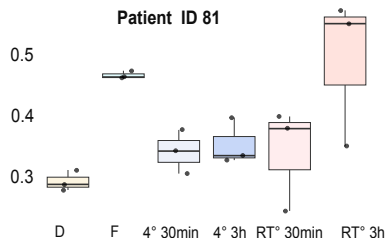

Supplement: Supplementary file 3 [file 68bf459873aaa321306c9a56.pdf]

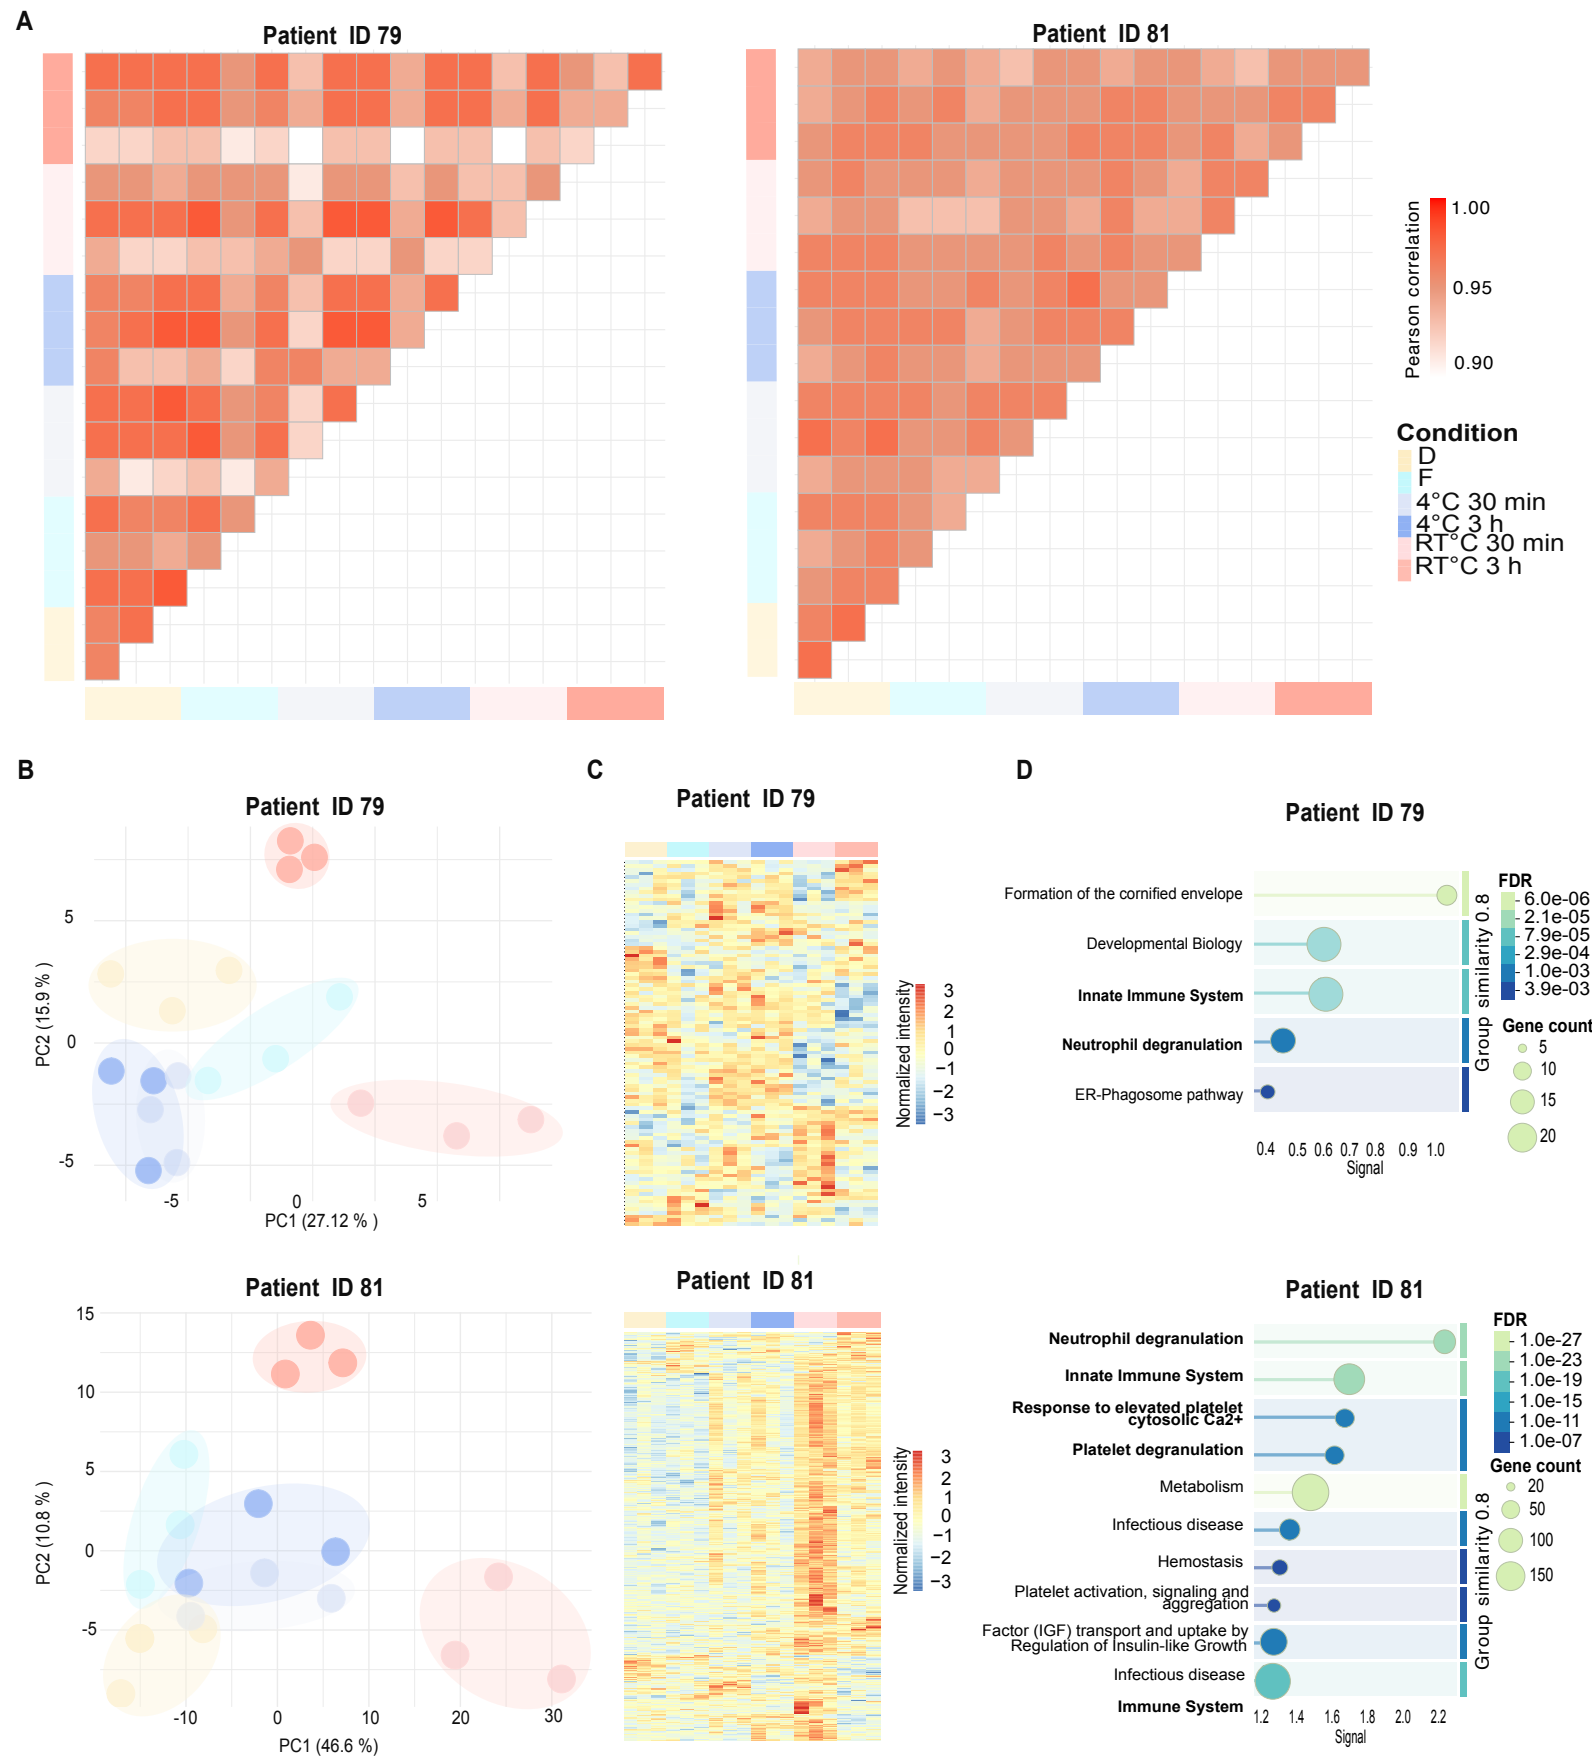

Supplement: Supplementary file 4 [file 84a2ae299d064e458c61ff5c.pdf]

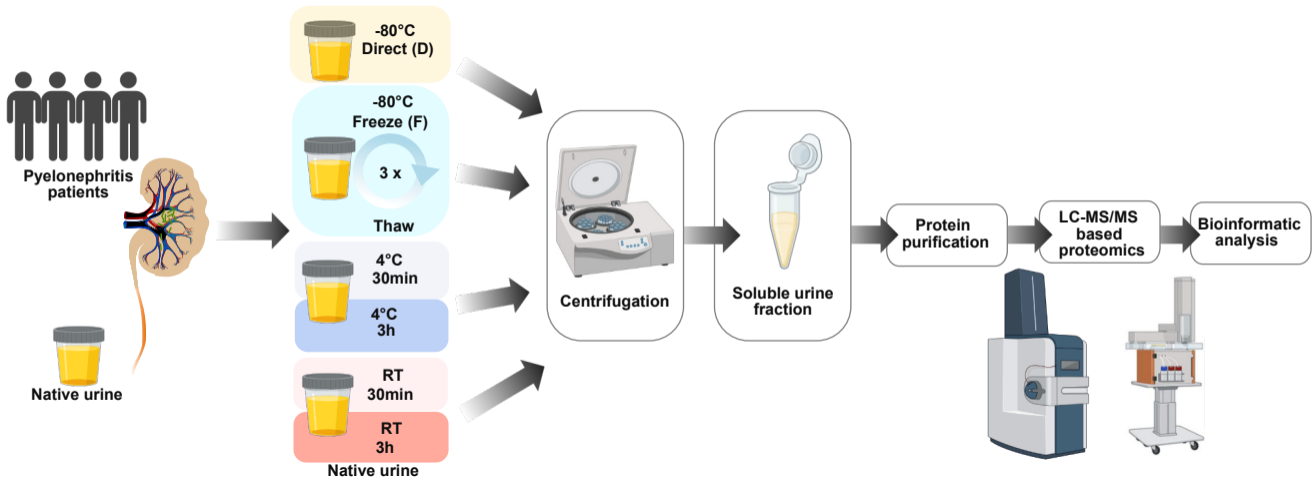

Supplement: Supplementary file 5 [file dde3b11a2d92119208944457.pdf]
